# Supplementary material
Source: PubMed Central journal article supplement (PMC8454890)
Supplement: NIHMS1739798-supplement-S2.pdf [file NIHMS1739798-supplement-S2.pdf]

# Experimental Parameters and Functional Components (FCs)

HT-MEK

# Preface

## Nomenclature

| <b>Term</b> | <b>Description</b> |
|-------------|--------------------|
|-------------|--------------------|

|     |                                                                                                                                          |
|-----|------------------------------------------------------------------------------------------------------------------------------------------|
| N/A | FC does not apply to the measurement. Applicable to FC2 and FC3 only, which are mutually exclusive.                                      |
| *   | Parameter has an undefined limit (i.e., the actual parameter value may be great or less than the estimate). These estimates are omitted. |
| ≤   | Estimate is an upper limit (prefix)                                                                                                      |
| ≥   | Estimate is a lower limit (prefix)                                                                                                       |
| -   | No estimate was obtained                                                                                                                 |

## Definitions

| <b>Term</b>                  | <b>p-value Threshold</b> | <b>Definition</b>                                                                                                                |
|------------------------------|--------------------------|----------------------------------------------------------------------------------------------------------------------------------|
| $f_a$                        | 0.01                     | $\frac{(f_r - 1)(k_{cat}/K_M)^{MeP} (k_{cat}/K_M)^{cMUP}}{k_1[f_r(k_{cat}/K_M)^{MeP} - (k_{cat}/K_M)^{cMUP}]}$ where $f_r = 776$ |
| $(k_{cat}/K_M)_{chem}^{MeP}$ | 0.05                     | $(k_{cat}/K_M)^{MeP} / f_a$                                                                                                      |
| <b>FC1</b>                   | 0.01                     | $\frac{(k_{cat}/K_M)^{MecMUP,mutant} / (k_{cat}/K_M)^{MecMUP,WT}}{(k_{cat}/K_M)^{MeP,mutant} / (k_{cat}/K_M)^{MeP,WT}}$          |
| <b>FC2</b>                   | 0.01                     | $(K_i P_i)^{mutant} / (K_i P_i)^{WT}$ where $(K_i P_i)^{mutant} < (K_i P_i)^{WT}$                                                |
| <b>FC3</b>                   | 0.01                     | $(K_i P_i)^{mutant} / (K_i P_i)^{WT}$ where $(K_i P_i)^{mutant} \geq (K_i P_i)^{WT}$                                             |
| <b>FC4</b>                   | 0.10                     | $\frac{k_{on,pi} K_i P_i k_{cat}^{cMUP,obs}}{f_a k_{on,pi} K_i P_i - k_{cat}^{cMUP,obs}}$                                        |

## Notes

1. **Bold**  $p$ -values are those below the defined  $p$ -value threshold for the corresponding parameter or FC
2. FCs without defined units are dimensionless quantities
3.  $p$ -values of magnitude 0 occur as a result of the bootstrapped hypothesis testing procedure, and are universally considered as below the defined  $p$ -value threshold for the corresponding parameter or FC
4. Active site variant estimates are derived from replicates on prints corresponding to Tiers I–III (Gly/Val libraries), not from the Active Site print
5. All estimates and  $p$ -values were rounded to two significant figures in tables below, though more significant figures are given in tables within the OSF Repository Data

## Active site variants

### Fit parameters

| Variant     | $k_{\text{cat}}$ cMUP ( $\text{s}^{-1}$ ) | $k_{\text{cat}}$ cMUP $p$ -value | $K_M$ cMUP ( $\mu\text{M}$ ) | $K_M$ cMUP $p$ -value                  | $k_{\text{cat}}/K_M$ cMUP ( $\text{M}^{-1}\text{s}^{-1}$ ) | $k_{\text{cat}}/K_M$ cMUP $p$ -value | $k_{\text{cat}}/K_M$ MeP ( $\text{M}^{-1}\text{s}^{-1}$ ) | $k_{\text{cat}}/K_M$ MeP $p$ -value   | $k_{\text{cat}}/K_M$ MecMUP ( $\text{M}^{-1}\text{s}^{-1}$ ) | $k_{\text{cat}}/K_M$ MecMUP $p$ -value | $K_i$ PO <sub>4</sub> ( $\mu\text{M}$ ) | $K_i$ PO <sub>4</sub> $p$ -value |
|-------------|-------------------------------------------|----------------------------------|------------------------------|----------------------------------------|------------------------------------------------------------|--------------------------------------|-----------------------------------------------------------|---------------------------------------|--------------------------------------------------------------|----------------------------------------|-----------------------------------------|----------------------------------|
| T79S        | 1.1                                       | <b>0</b>                         | $\leq 5.0$                   | <b>0</b>                               | $\geq 2.2 \times 10^5$                                     | <b>0</b>                             | $3.2 \times 10^4$                                         | <b>0</b>                              | $\geq 1.2 \times 10^1$                                       | <b><math>4.1 \times 10^{-3}</math></b> | $\leq 1.3 \times 10^1$                  | <b>0</b>                         |
| N100A       | $4.0 \times 10^{-1}$                      | <b>0</b>                         | $\leq 5.0$                   | <b>0</b>                               | $\geq 7.7 \times 10^4$                                     | <b>0</b>                             | $2.2 \times 10^3$                                         | <b><math>1. \times 10^{-4}</math></b> | $\leq 1.3$                                                   | <b>0</b>                               | $\leq 8.8 \times 10^2$                  | <b>0</b>                         |
| K162A       | $1.8 \times 10^{-2}$                      | <b>0</b>                         | $5.5 \times 10^1$            | <b><math>1.1 \times 10^{-3}</math></b> | $3.4 \times 10^2$                                          | <b>0</b>                             | $\leq 1.2 \times 10^4$                                    | <b>0</b>                              | $3.7 \times 10^1$                                            | <b>0</b>                               | -                                       | -                                |
| R164A       | 5.7                                       | <b>0</b>                         | $2.2 \times 10^1$            | <b>0</b>                               | $2.6 \times 10^5$                                          | <b>0</b>                             | $\leq 7.2 \times 10^3$                                    | <b>0</b>                              | $1.1 \times 10^2$                                            | <b>0</b>                               | $\geq 2.9 \times 10^3$                  | <b>0</b>                         |
| N100A/R164A | $6.8 \times 10^{-1}$                      | <b>0</b>                         | $1.8 \times 10^2$            | <b>0</b>                               | $3.7 \times 10^3$                                          | <b>0</b>                             | $\leq 7.0 \times 10^3$                                    | <b>0</b>                              | $\leq 1.3$                                                   | <b>0</b>                               | $5.6 \times 10^3$                       | <b>0</b>                         |
| WT          | $1.2 \times 10^2$                         | $9.7 \times 10^{-1}$             | $8.5 \times 10^1$            | 1.0                                    | $1.4 \times 10^6$                                          | $9.8 \times 10^{-1}$                 | $6.1 \times 10^5$                                         | $8.8 \times 10^{-1}$                  | $1.6 \times 10^1$                                            | $9.8 \times 10^{-1}$                   | $6.1 \times 10^2$                       | $8.7 \times 10^{-1}$             |

### Additional parameters and FCs

| Variant     | $f_a$                     | $f_a$ $p$ -value | $(k_{\text{cat}}/K_M)_{\text{chem}}^{\text{MeP}}$ ( $\text{M}^{-1}\text{s}^{-1}$ ) | $(k_{\text{cat}}/K_M)_{\text{chem}}^{\text{MeP}}$ $p$ -value | FC1                    | FC1 $p$ -value                         | FC2                       | FC3        | FC2/3 $p$ -value     | FC4 ( $\text{s}^{-1}$ ) | FC4 $p$ -value                         |
|-------------|---------------------------|------------------|------------------------------------------------------------------------------------|--------------------------------------------------------------|------------------------|----------------------------------------|---------------------------|------------|----------------------|-------------------------|----------------------------------------|
| T79S        | $1.6 \times 10^{-1}$      | <b>0</b>         | $2.1 \times 10^5$                                                                  | $1.2 \times 10^{-1}$                                         | $\geq 1.4 \times 10^1$ | <b><math>5.1 \times 10^{-4}</math></b> | $\leq 2.1 \times 10^{-2}$ | N/A        | <b>0</b>             | $\geq 1.1 \times 10^1$  | $6.8 \times 10^{-1}$                   |
| N100A       | $5.6 \times 10^{-2}$      | <b>0</b>         | $4.0 \times 10^4$                                                                  | <b><math>6.0 \times 10^{-3}</math></b>                       | -                      | -                                      | N/A                       | $\leq 1.4$ | <b>0</b>             | $\geq 7.2$              | <b><math>5.0 \times 10^{-3}</math></b> |
| K162A       | $\leq 1.0$                | 1.0              | $\leq 3.4 \times 10^2$                                                             | <b>0</b>                                                     | $\leq 1.1 \times 10^2$ | <b>0</b>                               | -                         | -          | -                    | -                       | -                                      |
| R164A       | $\leq 1.9 \times 10^{-1}$ | <b>0</b>         | $\leq 3.7 \times 10^4$                                                             | <b>0</b>                                                     | $\leq 5.8 \times 10^2$ | <b>0</b>                               | N/A                       | $\geq 4.8$ | <b>0</b>             | *                       | $8.0 \times 10^{-2}$                   |
| N100A/R164A | $\leq 1.0$                | 1.0              | $\leq 3.7 \times 10^3$                                                             | <b>0</b>                                                     | -                      | -                                      | N/A                       | 9.1        | <b>0</b>             | $\geq 2.7 \times 10^2$  | <b><math>5.0 \times 10^{-3}</math></b> |
| WT          | 1.0                       | 1.0              | $6.1 \times 10^5$                                                                  | 1.0                                                          | 1.0                    | 1.0                                    | N/A                       | 1.0        | $8.7 \times 10^{-1}$ | $1.4 \times 10^2$       | 1.0                                    |

## Valine and glycine library variants

### Fit parameters

| Variant | $k_{cat}$ cMUP (s <sup>-1</sup> ) | $k_{cat}$ cMUP $p$ -value    | $K_M$ cMUP ( $\mu$ M) | $K_M$ cMUP $p$ -value        | $k_{cat}/K_M$ cMUP (M <sup>-1</sup> s <sup>-1</sup> ) | $k_{cat}/K_M$ cMUP $p$ -value | $k_{cat}/K_M$ MeP (M <sup>-1</sup> s <sup>-1</sup> ) | $k_{cat}/K_M$ MeP $p$ -value | $k_{cat}/K_M$ MecMUP (M <sup>-1</sup> s <sup>-1</sup> ) | $k_{cat}/K_M$ MecMUP $p$ -value | $K_i$ PO <sub>4</sub> ( $\mu$ M) | $K_i$ PO <sub>4</sub> $p$ -value |
|---------|-----------------------------------|------------------------------|-----------------------|------------------------------|-------------------------------------------------------|-------------------------------|------------------------------------------------------|------------------------------|---------------------------------------------------------|---------------------------------|----------------------------------|----------------------------------|
| Q21G    | 2.2 × 10 <sup>2</sup>             | <b>6.0 × 10<sup>-4</sup></b> | 9.0 × 10 <sup>1</sup> | 6.9 × 10 <sup>-1</sup>       | 2.0 × 10 <sup>6</sup>                                 | 1.6 × 10 <sup>-1</sup>        | 6.1 × 10 <sup>5</sup>                                | 9.8 × 10 <sup>-1</sup>       | 1.5 × 10 <sup>1</sup>                                   | 7.5 × 10 <sup>-1</sup>          | 6.4 × 10 <sup>2</sup>            | 3.8 × 10 <sup>-1</sup>           |
| Q21V    | 2.1 × 10 <sup>2</sup>             | <b>1. × 10<sup>-4</sup></b>  | 9.2 × 10 <sup>1</sup> | 4.4 × 10 <sup>-1</sup>       | 2.2 × 10 <sup>6</sup>                                 | 1.2 × 10 <sup>-2</sup>        | 4.2 × 10 <sup>5</sup>                                | 6.9 × 10 <sup>-2</sup>       | 1.9 × 10 <sup>1</sup>                                   | 5.2 × 10 <sup>-1</sup>          | 6.6 × 10 <sup>2</sup>            | 2.0 × 10 <sup>-1</sup>           |
| K22G    | 7.4 × 10 <sup>1</sup>             | 9.9 × 10 <sup>-2</sup>       | 6.9 × 10 <sup>1</sup> | 2.3 × 10 <sup>-1</sup>       | 1.6 × 10 <sup>6</sup>                                 | 6.8 × 10 <sup>-1</sup>        | 5.2 × 10 <sup>5</sup>                                | 4.3 × 10 <sup>-1</sup>       | 1.3 × 10 <sup>1</sup>                                   | 4.1 × 10 <sup>-1</sup>          | 5.3 × 10 <sup>2</sup>            | 1.4 × 10 <sup>-2</sup>           |
| K22V    | 1.3 × 10 <sup>2</sup>             | 7.6 × 10 <sup>-1</sup>       | 1.0 × 10 <sup>2</sup> | 9.4 × 10 <sup>-2</sup>       | 1.2 × 10 <sup>6</sup>                                 | 3.9 × 10 <sup>-1</sup>        | 4.0 × 10 <sup>5</sup>                                | 9.8 × 10 <sup>-2</sup>       | 1.5 × 10 <sup>1</sup>                                   | 7.2 × 10 <sup>-1</sup>          | 7.1 × 10 <sup>2</sup>            | 1.6 × 10 <sup>-2</sup>           |
| T23G    | 1.1 × 10 <sup>2</sup>             | 5.0 × 10 <sup>-1</sup>       | 7.7 × 10 <sup>1</sup> | 4.1 × 10 <sup>-1</sup>       | 1.4 × 10 <sup>6</sup>                                 | 9.4 × 10 <sup>-1</sup>        | 6.9 × 10 <sup>5</sup>                                | 6.0 × 10 <sup>-1</sup>       | 2.0 × 10 <sup>1</sup>                                   | 1.4 × 10 <sup>-1</sup>          | 6.3 × 10 <sup>2</sup>            | 5.1 × 10 <sup>-1</sup>           |
| T23V    | 1.9 × 10 <sup>2</sup>             | 1.7 × 10 <sup>-2</sup>       | 1.1 × 10 <sup>2</sup> | 7.0 × 10 <sup>-2</sup>       | 1.9 × 10 <sup>6</sup>                                 | 1.7 × 10 <sup>-1</sup>        | 3.3 × 10 <sup>5</sup>                                | 2.4 × 10 <sup>-2</sup>       | 1.9 × 10 <sup>1</sup>                                   | 4.5 × 10 <sup>-1</sup>          | 6.4 × 10 <sup>2</sup>            | 5.6 × 10 <sup>-1</sup>           |
| N24G    | 1.0 × 10 <sup>2</sup>             | 4.4 × 10 <sup>-1</sup>       | 6.2 × 10 <sup>1</sup> | 9.4 × 10 <sup>-2</sup>       | 1.8 × 10 <sup>6</sup>                                 | 4.1 × 10 <sup>-1</sup>        | 5.5 × 10 <sup>5</sup>                                | 4.7 × 10 <sup>-1</sup>       | 1.3 × 10 <sup>1</sup>                                   | 3.4 × 10 <sup>-1</sup>          | 4.8 × 10 <sup>2</sup>            | <b>2.0 × 10<sup>-3</sup></b>     |
| N24V    | 1.3 × 10 <sup>2</sup>             | 3.9 × 10 <sup>-1</sup>       | 9.0 × 10 <sup>1</sup> | 5.2 × 10 <sup>-1</sup>       | 1.4 × 10 <sup>6</sup>                                 | 9.4 × 10 <sup>-1</sup>        | 4.2 × 10 <sup>5</sup>                                | 1.7 × 10 <sup>-1</sup>       | 2.0 × 10 <sup>1</sup>                                   | 3.9 × 10 <sup>-1</sup>          | 6.5 × 10 <sup>2</sup>            | 2.3 × 10 <sup>-1</sup>           |
| A25G    | 2.1 × 10 <sup>2</sup>             | <b>1.9 × 10<sup>-3</sup></b> | 8.6 × 10 <sup>1</sup> | 9.3 × 10 <sup>-1</sup>       | 2.7 × 10 <sup>6</sup>                                 | <b>2.0 × 10<sup>-3</sup></b>  | 8.5 × 10 <sup>5</sup>                                | 7.1 × 10 <sup>-2</sup>       | 2.4 × 10 <sup>1</sup>                                   | 1.6 × 10 <sup>-2</sup>          | 5.8 × 10 <sup>2</sup>            | 1.6 × 10 <sup>-1</sup>           |
| A25V    | 2.2 × 10 <sup>2</sup>             | <b>0</b>                     | 9.7 × 10 <sup>1</sup> | 2.0 × 10 <sup>-1</sup>       | 2.0 × 10 <sup>6</sup>                                 | 7.3 × 10 <sup>-2</sup>        | 6.7 × 10 <sup>5</sup>                                | 6.4 × 10 <sup>-1</sup>       | 1.8 × 10 <sup>1</sup>                                   | 4.9 × 10 <sup>-1</sup>          | 6.6 × 10 <sup>2</sup>            | 1.6 × 10 <sup>-1</sup>           |
| V26A    | 5.1 × 10 <sup>1</sup>             | <b>2.9 × 10<sup>-3</sup></b> | 7.9 × 10 <sup>1</sup> | 4.8 × 10 <sup>-1</sup>       | 7.3 × 10 <sup>5</sup>                                 | 4.2 × 10 <sup>-2</sup>        | 1.9 × 10 <sup>5</sup>                                | <b>1.9 × 10<sup>-3</sup></b> | 6.5                                                     | 1.2 × 10 <sup>-2</sup>          | 6.0 × 10 <sup>2</sup>            | 6.3 × 10 <sup>-1</sup>           |
| V26G    | 2.1 × 10 <sup>1</sup>             | <b>0</b>                     | 5.7 × 10 <sup>1</sup> | 1.2 × 10 <sup>-2</sup>       | 2.6 × 10 <sup>5</sup>                                 | <b>1.2 × 10<sup>-3</sup></b>  | 3.9 × 10 <sup>4</sup>                                | <b>0</b>                     | 3.8                                                     | <b>2.0 × 10<sup>-4</sup></b>    | 5.4 × 10 <sup>2</sup>            | 1.7 × 10 <sup>-2</sup>           |
| P27G    | 5.9 × 10 <sup>1</sup>             | 3.7 × 10 <sup>-2</sup>       | 7.0 × 10 <sup>1</sup> | 2.5 × 10 <sup>-1</sup>       | 4.3 × 10 <sup>5</sup>                                 | 1.3 × 10 <sup>-2</sup>        | 3.0 × 10 <sup>5</sup>                                | 1.2 × 10 <sup>-2</sup>       | 1.4 × 10 <sup>1</sup>                                   | 5.0 × 10 <sup>-1</sup>          | 5.5 × 10 <sup>2</sup>            | 4.3 × 10 <sup>-2</sup>           |
| P27V    | 1.4 × 10 <sup>2</sup>             | 4.0 × 10 <sup>-1</sup>       | 9.2 × 10 <sup>1</sup> | 4.3 × 10 <sup>-1</sup>       | 1.5 × 10 <sup>6</sup>                                 | 7.9 × 10 <sup>-1</sup>        | 2.5 × 10 <sup>5</sup>                                | 1.7 × 10 <sup>-2</sup>       | 1.3 × 10 <sup>1</sup>                                   | 5.2 × 10 <sup>-1</sup>          | 6.2 × 10 <sup>2</sup>            | 6.9 × 10 <sup>-1</sup>           |
| R28G    | 4.2 × 10 <sup>1</sup>             | 3.5 × 10 <sup>-2</sup>       | 3.8 × 10 <sup>1</sup> | 1.6 × 10 <sup>-2</sup>       | 1.1 × 10 <sup>6</sup>                                 | 5.3 × 10 <sup>-1</sup>        | 3.6 × 10 <sup>5</sup>                                | 4.1 × 10 <sup>-2</sup>       | 9.8                                                     | 3.8 × 10 <sup>-2</sup>          | 4.4 × 10 <sup>2</sup>            | <b>1.3 × 10<sup>-3</sup></b>     |
| R28V    | 7.6 × 10 <sup>1</sup>             | 3.0 × 10 <sup>-2</sup>       | 7.8 × 10 <sup>1</sup> | 4.6 × 10 <sup>-1</sup>       | 9.3 × 10 <sup>5</sup>                                 | 1.3 × 10 <sup>-1</sup>        | 1.3 × 10 <sup>5</sup>                                | <b>1.6 × 10<sup>-3</sup></b> | 1.0 × 10 <sup>1</sup>                                   | 1.1 × 10 <sup>-1</sup>          | 6.2 × 10 <sup>2</sup>            | 9.1 × 10 <sup>-1</sup>           |
| P29G    | 1.1 × 10 <sup>1</sup>             | <b>0</b>                     | 6.9 × 10 <sup>1</sup> | 8.9 × 10 <sup>-2</sup>       | 1.9 × 10 <sup>5</sup>                                 | <b>1. × 10<sup>-4</sup></b>   | 2.3 × 10 <sup>4</sup>                                | <b>5.0 × 10<sup>-4</sup></b> | ≤ 1.2                                                   | <b>0</b>                        | 4.9 × 10 <sup>2</sup>            | <b>0</b>                         |
| P29V    | 1.4 × 10 <sup>1</sup>             | <b>3.0 × 10<sup>-4</sup></b> | 7.6 × 10 <sup>1</sup> | 4.4 × 10 <sup>-1</sup>       | 2.0 × 10 <sup>5</sup>                                 | <b>4.5 × 10<sup>-3</sup></b>  | 1.3 × 10 <sup>5</sup>                                | <b>1.1 × 10<sup>-3</sup></b> | ≤ 1.9                                                   | <b>1. × 10<sup>-4</sup></b>     | 4.4 × 10 <sup>2</sup>            | <b>1. × 10<sup>-4</sup></b>      |
| K30G    | 5.0 × 10 <sup>1</sup>             | <b>1.8 × 10<sup>-3</sup></b> | 6.2 × 10 <sup>1</sup> | 3.0 × 10 <sup>-2</sup>       | 1.2 × 10 <sup>6</sup>                                 | 5.1 × 10 <sup>-1</sup>        | 2.6 × 10 <sup>5</sup>                                | 1.1 × 10 <sup>-2</sup>       | 1.1 × 10 <sup>1</sup>                                   | 9.8 × 10 <sup>-2</sup>          | 5.3 × 10 <sup>2</sup>            | 1.4 × 10 <sup>-2</sup>           |
| K30V    | 8.7 × 10 <sup>1</sup>             | 1.5 × 10 <sup>-1</sup>       | 9.1 × 10 <sup>1</sup> | 5.7 × 10 <sup>-1</sup>       | 9.5 × 10 <sup>5</sup>                                 | 2.0 × 10 <sup>-1</sup>        | 1.3 × 10 <sup>5</sup>                                | <b>1. × 10<sup>-4</sup></b>  | 7.4                                                     | 3.4 × 10 <sup>-2</sup>          | 5.4 × 10 <sup>2</sup>            | 4.5 × 10 <sup>-2</sup>           |
| L31G    | 2.3 × 10 <sup>-1</sup>            | <b>0</b>                     | 5.0 × 10 <sup>1</sup> | <b>5.3 × 10<sup>-3</sup></b> | 5.0 × 10 <sup>3</sup>                                 | <b>7.0 × 10<sup>-4</sup></b>  | ≤ 1.4 × 10 <sup>3</sup>                              | <b>0</b>                     | ≤ 9.9 × 10 <sup>-1</sup>                                | <b>0</b>                        | -                                | -                                |
| L31V    | 1.3 × 10 <sup>2</sup>             | 6.0 × 10 <sup>-1</sup>       | 8.6 × 10 <sup>1</sup> | 8.7 × 10 <sup>-1</sup>       | 1.4 × 10 <sup>6</sup>                                 | 8.4 × 10 <sup>-1</sup>        | 2.9 × 10 <sup>5</sup>                                | <b>6.1 × 10<sup>-3</sup></b> | 1.2 × 10 <sup>1</sup>                                   | 2.6 × 10 <sup>-1</sup>          | 6.2 × 10 <sup>2</sup>            | 7.4 × 10 <sup>-1</sup>           |
| V32A    | 1.6 × 10 <sup>2</sup>             | 6.9 × 10 <sup>-2</sup>       | 1.1 × 10 <sup>2</sup> | 6.9 × 10 <sup>-2</sup>       | 1.4 × 10 <sup>6</sup>                                 | 9.3 × 10 <sup>-1</sup>        | 2.5 × 10 <sup>5</sup>                                | 3.1 × 10 <sup>-2</sup>       | 1.6 × 10 <sup>1</sup>                                   | 9.5 × 10 <sup>-1</sup>          | 6.2 × 10 <sup>2</sup>            | 9.7 × 10 <sup>-1</sup>           |
| V32G    | 5.1 × 10 <sup>1</sup>             | 5.7 × 10 <sup>-2</sup>       | 6.4 × 10 <sup>1</sup> | 2.0 × 10 <sup>-1</sup>       | 7.3 × 10 <sup>5</sup>                                 | 2.0 × 10 <sup>-1</sup>        | 1.7 × 10 <sup>5</sup>                                | <b>8.2 × 10<sup>-3</sup></b> | 5.4                                                     | <b>1.1 × 10<sup>-3</sup></b>    | 4.6 × 10 <sup>2</sup>            | <b>2.1 × 10<sup>-3</sup></b>     |
| V33A    | 1.8 × 10 <sup>2</sup>             | 2.6 × 10 <sup>-2</sup>       | 9.8 × 10 <sup>1</sup> | 2.5 × 10 <sup>-1</sup>       | 1.9 × 10 <sup>6</sup>                                 | 2.1 × 10 <sup>-1</sup>        | 2.1 × 10 <sup>5</sup>                                | <b>1.0 × 10<sup>-3</sup></b> | 1.1 × 10 <sup>1</sup>                                   | 3.7 × 10 <sup>-1</sup>          | 6.0 × 10 <sup>2</sup>            | 4.4 × 10 <sup>-1</sup>           |
| V33G    | 3.4 × 10 <sup>1</sup>             | <b>1. × 10<sup>-4</sup></b>  | 5.9 × 10 <sup>1</sup> | 1.6 × 10 <sup>-2</sup>       | 5.5 × 10 <sup>5</sup>                                 | 1.0 × 10 <sup>-2</sup>        | 2.3 × 10 <sup>5</sup>                                | <b>5.6 × 10<sup>-3</sup></b> | 6.8                                                     | 1.4 × 10 <sup>-2</sup>          | 5.0 × 10 <sup>2</sup>            | <b>2.0 × 10<sup>-4</sup></b>     |
| G34A    | 9.8 × 10 <sup>1</sup>             | 2.5 × 10 <sup>-1</sup>       | 7.4 × 10 <sup>1</sup> | 2.2 × 10 <sup>-1</sup>       | 1.2 × 10 <sup>6</sup>                                 | 4.0 × 10 <sup>-1</sup>        | 7.0 × 10 <sup>5</sup>                                | 4.6 × 10 <sup>-1</sup>       | 1.6 × 10 <sup>1</sup>                                   | 9.6 × 10 <sup>-1</sup>          | 6.4 × 10 <sup>2</sup>            | 4.6 × 10 <sup>-1</sup>           |
| G34V    | 1.9 × 10 <sup>1</sup>             | <b>2.0 × 10<sup>-4</sup></b> | 8.0 × 10 <sup>1</sup> | 6.1 × 10 <sup>-1</sup>       | 2.7 × 10 <sup>5</sup>                                 | <b>3.2 × 10<sup>-3</sup></b>  | ≤ 3.4 × 10 <sup>4</sup>                              | <b>0</b>                     | ≤ 1.9                                                   | <b>0</b>                        | 4.4 × 10 <sup>2</sup>            | <b>0</b>                         |
| L35G    | 1.9                               | <b>2.5 × 10<sup>-3</sup></b> | 8.3 × 10 <sup>1</sup> | 8.8 × 10 <sup>-1</sup>       | 2.4 × 10 <sup>4</sup>                                 | <b>2.7 × 10<sup>-3</sup></b>  | ≤ 1.6 × 10 <sup>3</sup>                              | <b>0</b>                     | ≤ 1.3                                                   | <b>0</b>                        | 8.8 × 10 <sup>2</sup>            | <b>1.0 × 10<sup>-3</sup></b>     |
| L35V    | 1.5 × 10 <sup>2</sup>             | 7.5 × 10 <sup>-2</sup>       | 9.1 × 10 <sup>1</sup> | 5.4 × 10 <sup>-1</sup>       | 2.0 × 10 <sup>6</sup>                                 | 6.0 × 10 <sup>-2</sup>        | 4.8 × 10 <sup>5</sup>                                | 1.2 × 10 <sup>-1</sup>       | 1.7 × 10 <sup>1</sup>                                   | 8.1 × 10 <sup>-1</sup>          | 6.7 × 10 <sup>2</sup>            | 3.8 × 10 <sup>-2</sup>           |
| V36A    | 1.3 × 10 <sup>2</sup>             | 4.9 × 10 <sup>-1</sup>       | 8.0 × 10 <sup>1</sup> | 4.8 × 10 <sup>-1</sup>       | 1.9 × 10 <sup>6</sup>                                 | 1.9 × 10 <sup>-1</sup>        | 3.6 × 10 <sup>5</sup>                                | 4.3 × 10 <sup>-2</sup>       | 1.3 × 10 <sup>1</sup>                                   | 5.7 × 10 <sup>-1</sup>          | 5.1 × 10 <sup>2</sup>            | 5.2 × 10 <sup>-2</sup>           |
| V36G    | 1.8 × 10 <sup>1</sup>             | <b>0</b>                     | 2.3 × 10 <sup>1</sup> | <b>0</b>                     | 7.8 × 10 <sup>5</sup>                                 | 1.8 × 10 <sup>-2</sup>        | 1.4 × 10 <sup>5</sup>                                | <b>1.4 × 10<sup>-3</sup></b> | 5.3                                                     | <b>0</b>                        | 2.0 × 10 <sup>2</sup>            | <b>0</b>                         |
| V37A    | 1.9 × 10 <sup>2</sup>             | <b>2.4 × 10<sup>-3</sup></b> | 9.9 × 10 <sup>1</sup> | 1.7 × 10 <sup>-1</sup>       | 1.8 × 10 <sup>6</sup>                                 | 2.6 × 10 <sup>-1</sup>        | 3.6 × 10 <sup>5</sup>                                | 4.6 × 10 <sup>-2</sup>       | 1.3 × 10 <sup>1</sup>                                   | 5.2 × 10 <sup>-1</sup>          | 7.2 × 10 <sup>2</sup>            | 1.1 × 10 <sup>-2</sup>           |
| V37G    | 9.3 × 10 <sup>1</sup>             | 1.7 × 10 <sup>-1</sup>       | 7.0 × 10 <sup>1</sup> | 2.3 × 10 <sup>-1</sup>       | 1.2 × 10 <sup>6</sup>                                 | 5.5 × 10 <sup>-1</sup>        | 2.0 × 10 <sup>5</sup>                                | <b>4.6 × 10<sup>-3</sup></b> | 6.1                                                     | <b>1.7 × 10<sup>-3</sup></b>    | 4.8 × 10 <sup>2</sup>            | <b>3.0 × 10<sup>-4</sup></b>     |
| D38G    | 4.2                               | <b>0</b>                     | ≤ 5.0                 | <b>0</b>                     | ≥ 7.2 × 10 <sup>5</sup>                               | <b>5.0 × 10<sup>-3</sup></b>  | ≤ 6.0 × 10 <sup>3</sup>                              | <b>0</b>                     | 2.1                                                     | <b>3.0 × 10<sup>-4</sup></b>    | ≤ 1.3 × 10 <sup>2</sup>          | <b>0</b>                         |
| D38V    | -                                 | -                            | -                     | -                            | ≤ 6.0 × 10 <sup>2</sup>                               | <b>0</b>                      | ≤ 9.4 × 10 <sup>2</sup>                              | <b>0</b>                     | ≤ 1.3                                                   | <b>0</b>                        | -                                | -                                |
| Q39G    | 7.0 × 10 <sup>1</sup>             | 4.2 × 10 <sup>-2</sup>       | 3.8 × 10 <sup>1</sup> | <b>5.0 × 10<sup>-4</sup></b> | 1.8 × 10 <sup>6</sup>                                 | 3.3 × 10 <sup>-1</sup>        | 3.6 × 10 <sup>4</sup>                                | <b>1. × 10<sup>-4</sup></b>  | 2.6                                                     | <b>7.0 × 10<sup>-4</sup></b>    | 1.3 × 10 <sup>3</sup>            | <b>1. × 10<sup>-4</sup></b>      |
| Q39V    | 1.9                               | <b>0</b>                     | 4.5 × 10 <sup>1</sup> | <b>3.0 × 10<sup>-4</sup></b> | 4.6 × 10 <sup>4</sup>                                 | <b>0</b>                      | ≤ 1.6 × 10 <sup>3</sup>                              | <b>0</b>                     | ≤ 1.3                                                   | <b>1. × 10<sup>-4</sup></b>     | 2.6 × 10 <sup>2</sup>            | <b>3.0 × 10<sup>-4</sup></b>     |
| M40G    | 1.9 × 10 <sup>1</sup>             | <b>0</b>                     | 6.1 × 10 <sup>1</sup> | 2.4 × 10 <sup>-2</sup>       | 3.1 × 10 <sup>5</sup>                                 | <b>1.0 × 10<sup>-3</sup></b>  | 1.2 × 10 <sup>5</sup>                                | <b>1.9 × 10<sup>-3</sup></b> | 4.9                                                     | <b>8.0 × 10<sup>-4</sup></b>    | 3.8 × 10 <sup>2</sup>            | <b>0</b>                         |
| M40V    | 3.6                               | <b>0</b>                     | 5.9 × 10 <sup>1</sup> | <b>2.0 × 10<sup>-3</sup></b> | 7.0 × 10 <sup>4</sup>                                 | <b>0</b>                      | 3.1 × 10 <sup>3</sup>                                | <b>5.0 × 10<sup>-4</sup></b> | ≤ 1.3                                                   | <b>1. × 10<sup>-4</sup></b>     | 3.2 × 10 <sup>2</sup>            | <b>1. × 10<sup>-4</sup></b>      |
| R41G    | 2.0 × 10 <sup>2</sup>             | 2.0 × 10 <sup>-2</sup>       | 4.7 × 10 <sup>1</sup> | 3.1 × 10 <sup>-2</sup>       | 2.9 × 10 <sup>6</sup>                                 | <b>8.9 × 10<sup>-3</sup></b>  | 4.3 × 10 <sup>5</sup>                                | <b>1.8 × 10<sup>-1</sup></b> | 1.6 × 10 <sup>1</sup>                                   | 9.3 × 10 <sup>-1</sup>          | 5.5 × 10 <sup>2</sup>            | 1.1 × 10 <sup>-1</sup>           |
| R41V    | 5.6 × 10 <sup>1</sup>             | <b>1.7 × 10<sup>-3</sup></b> | 5.0 × 10 <sup>1</sup> | <b>6.0 × 10<sup>-4</sup></b> | 1.2 × 10 <sup>6</sup>                                 | 4.4 × 10 <sup>-1</sup>        | 2.2 × 10 <sup>5</sup>                                | <b>5.9 × 10<sup>-3</sup></b> | ≤ 2.3                                                   | <b>4.0 × 10<sup>-4</sup></b>    | 3.5 × 10 <sup>2</sup>            | <b>3.0 × 10<sup>-4</sup></b>     |
| W42G    | 4.8 × 10 <sup>1</sup>             | <b>9.3 × 10<sup>-3</sup></b> | 4.1 × 10 <sup>1</sup> | <b>1.9 × 10<sup>-3</sup></b> | 1.4 × 10 <sup>6</sup>                                 | 9.4 × 10 <sup>-1</sup>        | 2.6 × 10 <sup>5</sup>                                | 1.1 × 10 <sup>-2</sup>       | 6.2                                                     | <b>2.3 × 10<sup>-3</sup></b>    | 3.8 × 10 <sup>2</sup>            | <b>1. × 10<sup>-4</sup></b>      |
| W42V    | 1.8 × 10 <sup>2</sup>             | <b>7.6 × 10<sup>-3</sup></b> | 7.8 × 10 <sup>1</sup> | 4.5 × 10 <sup>-1</sup>       | 2.3 × 10 <sup>6</sup>                                 | <b>9.0 × 10<sup>-3</sup></b>  | 7.6 × 10 <sup>5</sup>                                | 2.6 × 10 <sup>-1</sup>       | 1.1 × 10 <sup>1</sup>                                   | 1.0 × 10 <sup>-1</sup>          | 5.0 × 10 <sup>2</sup>            | 2.3 × 10 <sup>-2</sup>           |
| D43G    | 8.8                               | <b>0</b>                     | 3.5 × 10 <sup>1</sup> | <b>0</b>                     | 2.5 × 10 <sup>5</sup>                                 | <b>0</b>                      | 1.8 × 10 <sup>4</sup>                                | <b>4.0 × 10<sup>-4</sup></b> | 1.4                                                     | <b>0</b>                        | 3.0 × 10 <sup>2</sup>            | <b>0</b>                         |
| D43V    | 7.8                               | <b>0</b>                     | 3.8 × 10 <sup>1</sup> | <b>0</b>                     | 2.4 × 10 <sup>5</sup>                                 | <b>1. × 10<sup>-4</sup></b>   | 1.5 × 10 <sup>4</sup>                                | <b>6.0 × 10<sup>-4</sup></b> | 2.0                                                     | <b>0</b>                        | 2.8 × 10 <sup>2</sup>            | <b>0</b>                         |
| Y44G    | 6.2 × 10 <sup>1</sup>             | 2.3 × 10 <sup>-2</sup>       | 7.4 × 10 <sup>1</sup> | 3.1 × 10 <sup>-1</sup>       | 8.6 × 10 <sup>5</sup>                                 | 1.4 × 10 <sup>-1</sup>        | 2.6 × 10 <sup>5</sup>                                | 1.3 × 10 <sup>-2</sup>       | 5.7                                                     | <b>5.2 × 10<sup>-3</sup></b>    | 6.9 × 10 <sup>2</sup>            | 2.2 × 10 <sup>-2</sup>           |
| Y44V    | 1.0 × 10 <sup>2</sup>             | 3.1 × 10 <sup>-1</sup>       | 7.2 × 10 <sup>1</sup> | 1.9 × 10 <sup>-1</sup>       | 1.6 × 10 <sup>6</sup>                                 | 5.6 × 10 <sup>-1</sup>        | 2.6 × 10 <sup>5</sup>                                | 1.0 × 10 <sup>-2</sup>       | 9.1                                                     | 8.6 × 10 <sup>-2</sup>          | 6.2 × 10 <sup>2</sup>            | 5.8 × 10 <sup>-1</sup>           |
| L45G    | 6.5 × 10 <sup>1</sup>             | 6.3 × 10 <sup>-2</sup>       | 6.2 × 10 <sup>1</sup> | 9.0 × 10 <sup>-2</sup>       | 1.0 × 10 <sup>6</sup>                                 | 4.0 × 10 <sup>-1</sup>        | 8.3 × 10 <sup>4</sup>                                | <b>1.4 × 10<sup>-3</sup></b> | 5.8                                                     | <b>6.4 × 10<sup>-3</sup></b>    | 5.4 × 10 <sup>2</sup>            | 3.8 × 10 <sup>-2</sup>           |
| L45V    | 4.9 × 10 <sup>1</sup>             | <b>1.7 × 10<sup>-3</sup></b> | 8.9 × 10 <sup>1</sup> | 6.8 × 10 <sup>-1</sup>       | 6.2 × 10 <sup>5</sup>                                 | 1.5 × 10 <sup>-2</sup>        | 1.3 × 10 <sup>5</sup>                                | <b>6.3 × 10<sup>-3</sup></b> | 6.6                                                     | <b>2.8 × 10<sup>-3</sup></b>    | 5.7 × 10 <sup>2</sup>            | 1.9 × 10 <sup>-1</sup>           |
| Y46G    | 2.1 × 10 <sup>1</sup>             | <b>3.0 × 10<sup>-4</sup></b> | 4.4 × 10 <sup>1</sup> | <b>1.4 × 10<sup>-3</sup></b> | 4.0 × 10 <sup>5</sup>                                 | <b>6.1 × 10<sup>-3</sup></b>  | 2.7 × 10 <sup>5</sup>                                | 1.1 × 10 <sup>-2</sup>       | ≤ 3.2 × 10 <sup>-1</sup>                                | <b>0</b>                        | 3.4 × 10 <sup>2</sup>            | <b>1. × 10<sup>-4</sup></b>      |
| Y46V    | 1.2 × 10 <sup>2</sup>             | 9.3 × 10 <sup>-1</sup>       | 8.5 × 10 <sup>1</sup> | 9.5 × 10 <sup>-1</sup>       | 1.6 × 10 <sup>6</sup>                                 | 6.5 × 10 <sup>-1</sup>        | 3.4 × 10 <sup>5</sup>                                | 1.7 × 10 <sup>-2</sup>       | 1.5 × 10 <sup>1</sup>                                   | 7.9 × 10 <sup>-1</sup>          | 5.6 × 10 <sup>2</sup>            | 6.6 × 10 <sup>-2</sup>           |
| R47G    | 4.0 × 10 <sup>1</sup>             | 1.0 × 10 <sup>-2</sup>       | 5.1 × 10 <sup>1</sup> | 1.7 × 10 <sup>-2</sup>       | 8.4 × 10 <sup>5</sup>                                 | 1.8 × 10 <sup>-1</sup>        | 1.8 × 10 <sup>5</sup>                                | 2.7 × 10 <sup>-2</sup>       | 6.9                                                     | <b>3.1 × 10<sup>-3</sup></b>    | 4.8 × 10 <sup>2</sup>            | <b>0</b>                         |
| R47V    | 1.3 × 10 <sup>2</sup>             | 5.5 × 10 <sup>-1</sup>       | 8.0 × 10 <sup>1</sup> | 5.6 × 10 <sup>-1</sup>       | 1.7 × 10 <sup>6</sup>                                 | 3.9 × 10 <sup>-1</sup>        | 9.8 × 10 <sup>4</sup>                                | <b>8.0 × 10<sup>-4</sup></b> | 1.2 × 10 <sup>1</sup>                                   | 2.6 × 10 <sup>-1</sup>          |                                  |                                  |

| Variant | $k_{cat}$ cMUP (s <sup>-1</sup> ) | $k_{cat}$ cMUP $p$ -value  | $K_M$ cMUP ( $\mu$ M) | $K_M$ cMUP $p$ -value      | $k_{cat}/K_M$ cMUP (M <sup>-1</sup> s <sup>-1</sup> ) | $k_{cat}/K_M$ cMUP $p$ -value | $k_{cat}/K_M$ MeP (M <sup>-1</sup> s <sup>-1</sup> ) | $k_{cat}/K_M$ MeP $p$ -value | $k_{cat}/K_M$ MecMUP (M <sup>-1</sup> s <sup>-1</sup> ) | $k_{cat}/K_M$ MecMUP $p$ -value | $K_i$ PO <sub>4</sub> ( $\mu$ M) | $K_i$ PO <sub>4</sub> $p$ -value |
|---------|-----------------------------------|----------------------------|-----------------------|----------------------------|-------------------------------------------------------|-------------------------------|------------------------------------------------------|------------------------------|---------------------------------------------------------|---------------------------------|----------------------------------|----------------------------------|
| K58V    | 1.2×10 <sup>2</sup>               | 8.0×10 <sup>-1</sup>       | 8.2×10 <sup>1</sup>   | 7.1×10 <sup>-1</sup>       | 1.1×10 <sup>6</sup>                                   | 3.4×10 <sup>-1</sup>          | 2.1×10 <sup>5</sup>                                  | 1.7×10 <sup>-2</sup>         | 1.3×10 <sup>1</sup>                                     | 5.5×10 <sup>-1</sup>            | 6.1×10 <sup>2</sup>              | 8.9×10 <sup>-1</sup>             |
| R59G    | 1.5×10 <sup>1</sup>               | <b>1.0×10<sup>-3</sup></b> | 7.3×10 <sup>1</sup>   | 3.5×10 <sup>-1</sup>       | 2.1×10 <sup>5</sup>                                   | <b>4.4×10<sup>-3</sup></b>    | 3.3×10 <sup>4</sup>                                  | <b>0</b>                     | ≤ 9.9×10 <sup>-1</sup>                                  | <b>0</b>                        | 5.8×10 <sup>2</sup>              | 2.5×10 <sup>-1</sup>             |
| R59V    | 2.7×10 <sup>1</sup>               | <b>1.×10<sup>-4</sup></b>  | 8.4×10 <sup>1</sup>   | 9.0×10 <sup>-1</sup>       | 4.3×10 <sup>5</sup>                                   | <b>7.9×10<sup>-3</sup></b>    | 1.9×10 <sup>4</sup>                                  | <b>0</b>                     | 4.2                                                     | <b>9.0×10<sup>-4</sup></b>      | 4.9×10 <sup>2</sup>              | 2.4×10 <sup>-2</sup>             |
| M60G    | 3.4×10 <sup>1</sup>               | <b>2.8×10<sup>-3</sup></b> | 8.7×10 <sup>1</sup>   | 8.8×10 <sup>-1</sup>       | 3.9×10 <sup>5</sup>                                   | 1.4×10 <sup>-2</sup>          | 9.5×10 <sup>4</sup>                                  | <b>5.5×10<sup>-3</sup></b>   | 2.3                                                     | <b>2.0×10<sup>-4</sup></b>      | 6.9×10 <sup>2</sup>              | 2.5×10 <sup>-2</sup>             |
| M60V    | 2.0×10 <sup>2</sup>               | <b>2.0×10<sup>-4</sup></b> | 1.0×10 <sup>2</sup>   | 6.1×10 <sup>-2</sup>       | 1.7×10 <sup>6</sup>                                   | 3.5×10 <sup>-1</sup>          | 3.9×10 <sup>5</sup>                                  | 7.7×10 <sup>-2</sup>         | 8.8                                                     | 7.7×10 <sup>-2</sup>            | 8.1×10 <sup>2</sup>              | <b>2.0×10<sup>-4</sup></b>       |
| L61G    | 1.3×10 <sup>2</sup>               | 8.5×10 <sup>-1</sup>       | 7.0×10 <sup>1</sup>   | 2.3×10 <sup>-1</sup>       | 1.3×10 <sup>6</sup>                                   | 7.7×10 <sup>-1</sup>          | 2.4×10 <sup>5</sup>                                  | <b>7.4×10<sup>-3</sup></b>   | 6.0                                                     | <b>1.8×10<sup>-3</sup></b>      | 4.7×10 <sup>2</sup>              | <b>4.0×10<sup>-4</sup></b>       |
| L61V    | 6.6×10 <sup>1</sup>               | <b>3.9×10<sup>-3</sup></b> | 8.2×10 <sup>1</sup>   | 7.2×10 <sup>-1</sup>       | 7.6×10 <sup>5</sup>                                   | 2.1×10 <sup>-2</sup>          | 2.7×10 <sup>5</sup>                                  | <b>1.9×10<sup>-3</sup></b>   | 5.6                                                     | <b>1.3×10<sup>-3</sup></b>      | 5.8×10 <sup>2</sup>              | 8.2×10 <sup>-2</sup>             |
| N62G    | 1.0×10 <sup>2</sup>               | 3.6×10 <sup>-1</sup>       | 6.7×10 <sup>1</sup>   | 1.3×10 <sup>-1</sup>       | 1.2×10 <sup>6</sup>                                   | 4.9×10 <sup>-1</sup>          | 3.3×10 <sup>5</sup>                                  | 2.8×10 <sup>-2</sup>         | 1.8×10 <sup>1</sup>                                     | 5.5×10 <sup>-1</sup>            | 5.0×10 <sup>2</sup>              | 3.0×10 <sup>-2</sup>             |
| N62V    | 1.6×10 <sup>2</sup>               | 2.7×10 <sup>-2</sup>       | 1.0×10 <sup>2</sup>   | 5.9×10 <sup>-2</sup>       | 1.5×10 <sup>6</sup>                                   | 6.6×10 <sup>-1</sup>          | 1.1×10 <sup>5</sup>                                  | <b>1.0×10<sup>-3</sup></b>   | 1.2×10 <sup>1</sup>                                     | 1.9×10 <sup>-1</sup>            | 6.6×10 <sup>2</sup>              | 1.4×10 <sup>-1</sup>             |
| T63G    | 1.1×10 <sup>2</sup>               | 6.4×10 <sup>-1</sup>       | 5.8×10 <sup>1</sup>   | 5.5×10 <sup>-2</sup>       | 2.0×10 <sup>6</sup>                                   | 1.6×10 <sup>-1</sup>          | 3.2×10 <sup>5</sup>                                  | 2.9×10 <sup>-2</sup>         | 1.8×10 <sup>1</sup>                                     | 5.5×10 <sup>-1</sup>            | 5.0×10 <sup>2</sup>              | <b>1.5×10<sup>-3</sup></b>       |
| T63V    | 1.1×10 <sup>2</sup>               | 2.9×10 <sup>-1</sup>       | 9.1×10 <sup>1</sup>   | 4.7×10 <sup>-1</sup>       | 1.2×10 <sup>6</sup>                                   | 3.5×10 <sup>-1</sup>          | 3.8×10 <sup>5</sup>                                  | 3.7×10 <sup>-2</sup>         | 1.0×10 <sup>1</sup>                                     | 1.4×10 <sup>-1</sup>            | 6.5×10 <sup>2</sup>              | 2.9×10 <sup>-1</sup>             |
| G64A    | 1.2×10 <sup>1</sup>               | <b>0</b>                   | 7.9×10 <sup>1</sup>   | 4.4×10 <sup>-1</sup>       | 1.6×10 <sup>5</sup>                                   | <b>0</b>                      | 3.0×10 <sup>4</sup>                                  | <b>0</b>                     | ≤ 1.2                                                   | <b>0</b>                        | 5.9×10 <sup>2</sup>              | 3.0×10 <sup>-1</sup>             |
| G64V    | -                                 | -                          | -                     | -                          | ≤ 3.8×10 <sup>2</sup>                                 | <b>0</b>                      | ≤ 8.9×10 <sup>2</sup>                                | <b>0</b>                     | ≤ 1.3                                                   | <b>0</b>                        | -                                | -                                |
| Y65G    | 4.9×10 <sup>1</sup>               | <b>1.7×10<sup>-3</sup></b> | 6.7×10 <sup>1</sup>   | 8.7×10 <sup>-2</sup>       | 6.0×10 <sup>5</sup>                                   | 1.4×10 <sup>-2</sup>          | 7.8×10 <sup>4</sup>                                  | <b>1.2×10<sup>-3</sup></b>   | 5.6                                                     | <b>9.0×10<sup>-4</sup></b>      | 5.1×10 <sup>2</sup>              | <b>2.5×10<sup>-3</sup></b>       |
| Y65V    | 1.3×10 <sup>2</sup>               | 6.6×10 <sup>-1</sup>       | 8.7×10 <sup>1</sup>   | 8.4×10 <sup>-1</sup>       | 1.4×10 <sup>6</sup>                                   | 1.0                           | 2.4×10 <sup>5</sup>                                  | <b>1.9×10<sup>-3</sup></b>   | 1.0×10 <sup>1</sup>                                     | 8.7×10 <sup>-2</sup>            | 6.6×10 <sup>2</sup>              | 2.2×10 <sup>-1</sup>             |
| S66G    | 7.5×10 <sup>1</sup>               | 3.5×10 <sup>-2</sup>       | 6.6×10 <sup>1</sup>   | 8.2×10 <sup>-2</sup>       | 1.1×10 <sup>6</sup>                                   | 3.7×10 <sup>-1</sup>          | 3.1×10 <sup>5</sup>                                  | 1.5×10 <sup>-2</sup>         | 1.3×10 <sup>1</sup>                                     | 2.8×10 <sup>-1</sup>            | 4.7×10 <sup>2</sup>              | <b>0</b>                         |
| S66V    | 1.0×10 <sup>2</sup>               | 2.0×10 <sup>-1</sup>       | 8.9×10 <sup>1</sup>   | 6.0×10 <sup>-1</sup>       | 1.1×10 <sup>6</sup>                                   | 2.8×10 <sup>-1</sup>          | 3.6×10 <sup>5</sup>                                  | 1.9×10 <sup>-2</sup>         | 8.8                                                     | 1.6×10 <sup>-2</sup>            | 5.9×10 <sup>2</sup>              | 2.3×10 <sup>-1</sup>             |
| L67G    | 3.8×10 <sup>1</sup>               | <b>3.1×10<sup>-3</sup></b> | 5.5×10 <sup>1</sup>   | 3.2×10 <sup>-2</sup>       | 7.4×10 <sup>5</sup>                                   | 1.2×10 <sup>-1</sup>          | 1.1×10 <sup>5</sup>                                  | <b>2.1×10<sup>-3</sup></b>   | 9.0                                                     | 2.7×10 <sup>-2</sup>            | 4.7×10 <sup>2</sup>              | <b>3.0×10<sup>-4</sup></b>       |
| L67V    | 8.3×10 <sup>1</sup>               | 7.0×10 <sup>-2</sup>       | 8.1×10 <sup>1</sup>   | 6.7×10 <sup>-1</sup>       | 1.1×10 <sup>6</sup>                                   | 3.1×10 <sup>-1</sup>          | 2.1×10 <sup>5</sup>                                  | 5.0×10 <sup>-2</sup>         | 8.7                                                     | 5.7×10 <sup>-2</sup>            | 6.0×10 <sup>2</sup>              | 5.7×10 <sup>-1</sup>             |
| N68G    | 6.8×10 <sup>1</sup>               | 2.1×10 <sup>-2</sup>       | 7.7×10 <sup>1</sup>   | 4.3×10 <sup>-1</sup>       | 8.4×10 <sup>5</sup>                                   | 7.7×10 <sup>-2</sup>          | 1.6×10 <sup>5</sup>                                  | 3.1×10 <sup>-2</sup>         | 9.5                                                     | 2.9×10 <sup>-2</sup>            | 6.3×10 <sup>2</sup>              | 6.0×10 <sup>-1</sup>             |
| N68V    | 1.6×10 <sup>1</sup>               | <b>0</b>                   | 7.9×10 <sup>1</sup>   | 3.7×10 <sup>-1</sup>       | 2.3×10 <sup>5</sup>                                   | <b>0</b>                      | 6.9×10 <sup>4</sup>                                  | 1.1×10 <sup>-2</sup>         | ≤ 9.7×10 <sup>-1</sup>                                  | <b>0</b>                        | 4.8×10 <sup>2</sup>              | <b>0</b>                         |
| N69G    | 1.8×10 <sup>1</sup>               | <b>5.0×10<sup>-4</sup></b> | 5.1×10 <sup>1</sup>   | 2.0×10 <sup>-2</sup>       | 3.4×10 <sup>5</sup>                                   | 1.1×10 <sup>-2</sup>          | 1.2×10 <sup>5</sup>                                  | <b>1.6×10<sup>-3</sup></b>   | 6.6                                                     | 1.5×10 <sup>-2</sup>            | 4.5×10 <sup>2</sup>              | <b>2.0×10<sup>-4</sup></b>       |
| N69V    | 5.1×10 <sup>1</sup>               | <b>2.0×10<sup>-3</sup></b> | 7.1×10 <sup>1</sup>   | 1.8×10 <sup>-1</sup>       | 7.1×10 <sup>5</sup>                                   | 3.5×10 <sup>-2</sup>          | ≤ 8.2×10 <sup>4</sup>                                | <b>3.9×10<sup>-3</sup></b>   | 6.3                                                     | <b>2.1×10<sup>-3</sup></b>      | 5.0×10 <sup>2</sup>              | <b>3.7×10<sup>-3</sup></b>       |
| V70A    | 2.1×10 <sup>2</sup>               | <b>1.2×10<sup>-3</sup></b> | 7.5×10 <sup>1</sup>   | 3.7×10 <sup>-1</sup>       | 2.4×10 <sup>6</sup>                                   | <b>8.3×10<sup>-3</sup></b>    | 8.4×10 <sup>5</sup>                                  | 1.2×10 <sup>-1</sup>         | 1.8×10 <sup>1</sup>                                     | 6.1×10 <sup>-1</sup>            | 5.1×10 <sup>2</sup>              | 2.8×10 <sup>-2</sup>             |
| V70G    | 3.2                               | <b>6.0×10<sup>-4</sup></b> | 5.1×10 <sup>1</sup>   | 1.8×10 <sup>-2</sup>       | 6.2×10 <sup>4</sup>                                   | <b>2.3×10<sup>-3</sup></b>    | 1.0×10 <sup>4</sup>                                  | <b>5.0×10<sup>-4</sup></b>   | ≤ 9.9×10 <sup>-1</sup>                                  | <b>0</b>                        | 3.5×10 <sup>2</sup>              | <b>7.0×10<sup>-4</sup></b>       |
| H71G    | 9.6×10 <sup>1</sup>               | 3.0×10 <sup>-1</sup>       | 7.4×10 <sup>1</sup>   | 2.7×10 <sup>-1</sup>       | 1.5×10 <sup>6</sup>                                   | 7.2×10 <sup>-1</sup>          | 3.7×10 <sup>5</sup>                                  | 5.8×10 <sup>-2</sup>         | 7.5                                                     | <b>5.9×10<sup>-3</sup></b>      | 4.3×10 <sup>2</sup>              | <b>2.0×10<sup>-4</sup></b>       |
| H71V    | 1.1×10 <sup>2</sup>               | 4.5×10 <sup>-1</sup>       | 9.0×10 <sup>1</sup>   | 7.0×10 <sup>-1</sup>       | 1.5×10 <sup>6</sup>                                   | 7.6×10 <sup>-1</sup>          | 8.6×10 <sup>5</sup>                                  | 4.7×10 <sup>-2</sup>         | 1.0×10 <sup>1</sup>                                     | 8.2×10 <sup>-2</sup>            | 6.0×10 <sup>2</sup>              | 4.9×10 <sup>-1</sup>             |
| I72G    | 4.1                               | <b>0</b>                   | 9.7×10 <sup>1</sup>   | 1.6×10 <sup>-1</sup>       | 3.5×10 <sup>4</sup>                                   | <b>1.×10<sup>-4</sup></b>     | 5.9×10 <sup>3</sup>                                  | <b>1.×10<sup>-4</sup></b>    | ≤ 1.1                                                   | <b>1.×10<sup>-4</sup></b>       | 5.0×10 <sup>2</sup>              | <b>1.×10<sup>-4</sup></b>        |
| I72V    | 8.0×10 <sup>1</sup>               | 8.4×10 <sup>-2</sup>       | 8.0×10 <sup>1</sup>   | 6.7×10 <sup>-1</sup>       | 1.1×10 <sup>6</sup>                                   | 3.8×10 <sup>-1</sup>          | 2.5×10 <sup>5</sup>                                  | 1.0×10 <sup>-2</sup>         | 1.1×10 <sup>1</sup>                                     | 2.1×10 <sup>-1</sup>            | 3.6×10 <sup>2</sup>              | <b>0</b>                         |
| D73G    | 2.1×10 <sup>1</sup>               | <b>5.0×10<sup>-4</sup></b> | 5.7×10 <sup>1</sup>   | 2.2×10 <sup>-2</sup>       | 3.7×10 <sup>5</sup>                                   | <b>5.4×10<sup>-3</sup></b>    | 1.5×10 <sup>5</sup>                                  | <b>1.7×10<sup>-3</sup></b>   | 4.3                                                     | <b>0</b>                        | 4.1×10 <sup>2</sup>              | <b>1.×10<sup>-4</sup></b>        |
| D73V    | 2.0×10 <sup>1</sup>               | <b>0</b>                   | 7.3×10 <sup>1</sup>   | 6.0×10 <sup>-2</sup>       | 2.5×10 <sup>5</sup>                                   | <b>0</b>                      | 6.4×10 <sup>4</sup>                                  | <b>4.0×10<sup>-4</sup></b>   | 2.3                                                     | <b>4.0×10<sup>-4</sup></b>      | 3.4×10 <sup>2</sup>              | <b>0</b>                         |
| Y74G    | 4.9                               | <b>0</b>                   | 2.7×10 <sup>1</sup>   | <b>0</b>                   | 1.7×10 <sup>5</sup>                                   | <b>0</b>                      | ≥ 1.2×10 <sup>5</sup>                                | <b>0</b>                     | 5.6                                                     | <b>1.×10<sup>-4</sup></b>       | 4.1×10 <sup>1</sup>              | <b>0</b>                         |
| Y74V    | 5.6×10 <sup>1</sup>               | <b>1.9×10<sup>-3</sup></b> | 5.1×10 <sup>1</sup>   | <b>1.8×10<sup>-3</sup></b> | 1.0×10 <sup>6</sup>                                   | 1.8×10 <sup>-1</sup>          | 5.0×10 <sup>5</sup>                                  | 2.8×10 <sup>-1</sup>         | 2.1×10 <sup>1</sup>                                     | 2.7×10 <sup>-1</sup>            | 1.1×10 <sup>2</sup>              | <b>0</b>                         |
| V75A    | 6.6×10 <sup>1</sup>               | 1.8×10 <sup>-2</sup>       | 7.1×10 <sup>1</sup>   | 2.0×10 <sup>-1</sup>       | 9.3×10 <sup>5</sup>                                   | 1.4×10 <sup>-1</sup>          | ≤ 5.6×10 <sup>4</sup>                                | <b>6.0×10<sup>-4</sup></b>   | 4.3                                                     | <b>1.3×10<sup>-3</sup></b>      | 5.5×10 <sup>2</sup>              | 7.8×10 <sup>-2</sup>             |
| V75G    | 1.0×10 <sup>1</sup>               | <b>4.0×10<sup>-3</sup></b> | 4.3×10 <sup>1</sup>   | 1.9×10 <sup>-2</sup>       | 2.9×10 <sup>5</sup>                                   | 2.5×10 <sup>-2</sup>          | 2.2×10 <sup>5</sup>                                  | <b>4.8×10<sup>-3</sup></b>   | ≤ 1.3                                                   | <b>1.×10<sup>-4</sup></b>       | 2.1×10 <sup>2</sup>              | <b>1.×10<sup>-4</sup></b>        |
| P76V    | 2.8                               | <b>0</b>                   | 5.1×10 <sup>1</sup>   | <b>8.0×10<sup>-4</sup></b> | 7.1×10 <sup>4</sup>                                   | <b>0</b>                      | 5.5×10 <sup>3</sup>                                  | <b>8.0×10<sup>-3</sup></b>   | ≤ 1.9                                                   | <b>1.×10<sup>-4</sup></b>       | 2.5×10 <sup>2</sup>              | <b>1.×10<sup>-4</sup></b>        |
| T77G    | 1.2×10 <sup>1</sup>               | <b>3.0×10<sup>-4</sup></b> | 3.2×10 <sup>1</sup>   | <b>0</b>                   | 2.6×10 <sup>5</sup>                                   | <b>1.6×10<sup>-3</sup></b>    | 2.8×10 <sup>5</sup>                                  | 1.2×10 <sup>-2</sup>         | 1.1×10 <sup>1</sup>                                     | 6.2×10 <sup>-2</sup>            | 9.3×10 <sup>1</sup>              | <b>3.0×10<sup>-4</sup></b>       |
| T77V    | 5.3×10 <sup>1</sup>               | <b>8.3×10<sup>-3</sup></b> | 5.9×10 <sup>1</sup>   | 2.8×10 <sup>-2</sup>       | 9.0×10 <sup>5</sup>                                   | 1.4×10 <sup>-1</sup>          | 2.5×10 <sup>5</sup>                                  | <b>9.6×10<sup>-3</sup></b>   | 2.1×10 <sup>1</sup>                                     | 2.8×10 <sup>-1</sup>            | 2.5×10 <sup>2</sup>              | <b>1.9×10<sup>-3</sup></b>       |
| V78A    | 6.5×10 <sup>1</sup>               | <b>7.1×10<sup>-3</sup></b> | 3.0×10 <sup>1</sup>   | <b>0</b>                   | 2.7×10 <sup>6</sup>                                   | <b>3.0×10<sup>-4</sup></b>    | 5.4×10 <sup>4</sup>                                  | <b>1.×10<sup>-4</sup></b>    | ≤ 1.8                                                   | <b>0</b>                        | 6.1×10 <sup>2</sup>              | 9.8×10 <sup>-1</sup>             |
| V78G    | 1.7×10 <sup>1</sup>               | <b>3.0×10<sup>-4</sup></b> | 2.4×10 <sup>1</sup>   | <b>1.×10<sup>-4</sup></b>  | 6.5×10 <sup>5</sup>                                   | 3.9×10 <sup>-2</sup>          | 9.7×10 <sup>4</sup>                                  | <b>5.0×10<sup>-3</sup></b>   | ≤ 9.9×10 <sup>-1</sup>                                  | <b>4.0×10<sup>-4</sup></b>      | 2.9×10 <sup>2</sup>              | <b>0</b>                         |
| T79G    | -                                 | -                          | -                     | -                          | ≤ 1.5×10 <sup>3</sup>                                 | <b>0</b>                      | ≤ 6.3×10 <sup>3</sup>                                | <b>0</b>                     | ≤ 1.3                                                   | <b>0</b>                        | -                                | -                                |
| T79V    | -                                 | -                          | -                     | -                          | ≤ 8.0×10 <sup>2</sup>                                 | <b>0</b>                      | ≤ 1.4×10 <sup>3</sup>                                | <b>0</b>                     | ≤ 1.3                                                   | <b>0</b>                        | -                                | -                                |
| A80G    | 3.5×10 <sup>1</sup>               | <b>1.×10<sup>-4</sup></b>  | 6.8×10 <sup>1</sup>   | 1.1×10 <sup>-1</sup>       | 4.5×10 <sup>5</sup>                                   | <b>3.3×10<sup>-3</sup></b>    | 2.3×10 <sup>5</sup>                                  | <b>7.2×10<sup>-3</sup></b>   | 7.9                                                     | 1.1×10 <sup>-2</sup>            | 4.4×10 <sup>2</sup>              | <b>1.×10<sup>-4</sup></b>        |
| A80V    | 5.2                               | <b>0</b>                   | 4.0×10 <sup>1</sup>   | <b>0</b>                   | 2.0×10 <sup>5</sup>                                   | <b>0</b>                      | 1.5×10 <sup>4</sup>                                  | <b>2.0×10<sup>-4</sup></b>   | 8.5×10 <sup>-1</sup>                                    | <b>1.×10<sup>-4</sup></b>       | 1.1×10 <sup>3</sup>              | <b>0</b>                         |
| I81G    | 2.3×10 <sup>1</sup>               | <b>3.0×10<sup>-4</sup></b> | 2.6×10 <sup>1</sup>   | <b>0</b>                   | 9.4×10 <sup>5</sup>                                   | 2.0×10 <sup>-1</sup>          | 8.0×10 <sup>5</sup>                                  | 1.1×10 <sup>-1</sup>         | 1.8×10 <sup>1</sup>                                     | 6.9×10 <sup>-1</sup>            | 6.8×10 <sup>1</sup>              | <b>4.0×10<sup>-4</sup></b>       |
| I81V    | 1.1×10 <sup>2</sup>               | 4.1×10 <sup>-1</sup>       | 9.3×10 <sup>1</sup>   | 4.2×10 <sup>-1</sup>       | 1.3×10 <sup>6</sup>                                   | 7.9×10 <sup>-1</sup>          | 5.0×10 <sup>5</sup>                                  | 3.6×10 <sup>-1</sup>         | 1.8×10 <sup>1</sup>                                     | 8.0×10 <sup>-1</sup>            | 4.1×10 <sup>2</sup>              | <b>0</b>                         |
| G82A    | 1.4                               | <b>0</b>                   | 1.6×10 <sup>1</sup>   | <b>0</b>                   | 9.7×10 <sup>4</sup>                                   | <b>0</b>                      | ≥ 1.7×10 <sup>4</sup>                                | <b>0</b>                     | 4.9                                                     | <b>5.0×10<sup>-4</sup></b>      | 2.1×10 <sup>1</sup>              | <b>0</b>                         |
| G82V    | -                                 | -                          | -                     | -                          | ≤ 1.3×10 <sup>3</sup>                                 | <b>0</b>                      | ≤ 6.3×10 <sup>2</sup>                                | <b>0</b>                     | ≤ 1.4                                                   | <b>0</b>                        | -                                | -                                |
| H83G    | 1.9                               | <b>0</b>                   | 5.6                   | <b>0</b>                   | 3.1×10 <sup>5</sup>                                   | <b>0</b>                      | ≥ 2.1×10 <sup>5</sup>                                | <b>9.0×10<sup>-4</sup></b>   | 1.2                                                     | <b>1.×10<sup>-4</sup></b>       | 8.9                              | <b>0</b>                         |
| H83V    | 3.2×10 <sup>1</sup>               | <b>3.0×10<sup>-4</sup></b> | 1.9×10 <sup>1</sup>   | <b>0</b>                   | 1.8×10 <sup>6</sup>                                   | 2.2×10 <sup>-1</sup>          | 2.7×10 <sup>5</sup>                                  | 3.6×10 <sup>-2</sup>         | 4.4                                                     | <b>1.7×10<sup>-3</sup></b>      | 9.4×10 <sup>1</sup>              | <b>0</b>                         |
| T84G    | 1.2×10 <sup>2</sup>               | 9.5×10 <sup>-1</sup>       | 7.9×10 <sup>1</sup>   | 5.9×10 <sup>-1</sup>       | 1.9×10 <sup>6</sup>                                   | 2.2×10 <sup>-1</sup>          | 3.2×10 <sup>5</sup>                                  | 9.5×10 <sup>-2</sup>         | 1.7×10 <sup>1</sup>                                     | 8.2×10 <sup>-1</sup>            | 8.3×10 <sup>2</sup>              | <b>6.0×10<sup>-4</sup></b>       |
| S85G    | 7.9×10 <sup>1</sup>               | 7.5×10 <sup>-2</sup>       | 7.0×10 <sup>1</sup>   | 2.1×10 <sup>-1</sup>       | 1.1×10 <sup>6</sup>                                   | 4.6×10 <sup>-1</sup>          | 7.5×10 <sup>5</sup>                                  | 2.5×10 <sup>-1</sup>         | 1.0×10 <sup>1</sup>                                     | 5.2×10 <sup>-2</sup>            | 4.8×10 <sup>2</sup>              | <b>1.×10<sup>-4</sup></b>        |
| S85V    | 1.8×10 <sup>1</sup>               | <b>0</b>                   | 7.5×10 <sup>1</sup>   | 2.6×10 <sup>-1</sup>       | 2.7×10 <sup>5</sup>                                   | <b>0</b>                      | 1.2×10 <sup>4</sup>                                  | <b>0</b>                     | 2.5                                                     | <b>5.0×10<sup>-4</sup></b>      | 4.4×10 <sup>2</sup>              | <b>0</b>                         |
| I86G    | 7.8                               | <b>1.×10<sup>-4</sup></b>  | 7.1×10 <sup>1</sup>   | 2.2×10 <sup>-1</sup>       | 1.8×10 <sup>5</sup>                                   | <b>1.1×10<sup>-3</sup></b>    | 1.7×10 <sup>5</sup>                                  | <b>3.5×10<sup>-3</sup></b>   | 5.1                                                     | <b>7.0×10<sup>-4</sup></b>      | 3.7×10 <sup>2</sup>              | <b>0</b>                         |
| I86V    | 1.3×10 <sup>2</sup>               | 7.2×10 <sup>-1</sup>       | 7.6×10 <sup>1</sup>   | 3.7×10 <sup>-1</sup>       | 1.6×10 <sup>6</sup>                                   | 5.4×10 <sup>-1</sup>          | 3.7×10 <sup>5</sup>                                  | 6.2×10 <sup>-2</sup>         | 7.6                                                     | 2.8×10 <sup>-2</sup>            | 5.8×10 <sup>2</sup>              | 1.7×10 <sup>-1</sup>             |
| F87G    | 9.9×10 <sup>1</sup>               | 3.2×10 <sup>-1</sup>       | 6.3×10 <sup>1</sup>   | 5.6×10 <sup>-2</sup>       | 2.0×10 <sup>6</sup>                                   | 1.2×10 <sup>-1</sup>          | 6.7×10 <sup>5</sup>                                  | 6.0×10 <sup>-1</sup>         | 1.5×10 <sup>1</sup>                                     | 6.6×10 <sup>-1</sup>            | 3.5×10 <sup>2</sup>              | <b>1.×10<sup>-4</sup></b>        |
| F87V    | 9.8×10 <sup>1</sup>               | 2.0×10 <sup>-1</sup>       | 6.5×10 <sup>1</sup>   | 3.4×10 <sup>-2</sup>       | 1.7×10 <sup>6</sup>                                   | 4.4×10 <sup>-1</sup>          | 3.7×10 <sup>5</sup>                                  | 5.1×10 <sup>-2</sup>         | 1.7×10 <sup>1</sup>                                     | 9.2×10 <sup>-1</sup>            | 2.9×10 <sup>2</sup>              | <b>0</b>                         |
| T88G    | 9.7                               | <b>3.2×10<sup>-3</sup></b> | 4.0×10 <sup>1</sup>   | 1.2×10 <sup>-2</sup>       | 2.6×10 <sup>5</sup>                                   | 1.7×10 <sup>-2</sup>          | 2.2×10 <sup>5</sup>                                  | <b>6.6×10<sup>-3</sup></b>   | 6.2                                                     | <b>8.0×10<sup>-4</sup></b>      | 1.7×10 <sup>2</sup>              | <b>4.0×10<sup>-4</sup></b>       |
| T88V    | 4.9×10 <sup>1</sup>               | <b>2.5×10<sup>-3</sup></b> | 6.6×10 <sup>1</sup>   | 6.6×10 <sup>-2</sup>       | 7.5×10 <sup>5</sup>                                   | 4.6×10 <sup>-2</sup>          | 6.9×10 <sup>4</sup>                                  |                              |                                                         |                                 |                                  |                                  |

| Variant | $k_{cat}$ cMUP (s <sup>-1</sup> ) | $k_{cat}$ cMUP $p$ -value    | $K_M$ cMUP ( $\mu$ M) | $K_M$ cMUP $p$ -value        | $k_{cat}/K_M$ cMUP (M <sup>-1</sup> s <sup>-1</sup> ) | $k_{cat}/K_M$ cMUP $p$ -value | $k_{cat}/K_M$ MeP (M <sup>-1</sup> s <sup>-1</sup> ) | $k_{cat}/K_M$ MeP $p$ -value | $k_{cat}/K_M$ MecMUP (M <sup>-1</sup> s <sup>-1</sup> ) | $k_{cat}/K_M$ MecMUP $p$ -value | $K_i$ PO <sub>4</sub> ( $\mu$ M) | $K_i$ PO <sub>4</sub> $p$ -value |
|---------|-----------------------------------|------------------------------|-----------------------|------------------------------|-------------------------------------------------------|-------------------------------|------------------------------------------------------|------------------------------|---------------------------------------------------------|---------------------------------|----------------------------------|----------------------------------|
| I97G    | -                                 | -                            | -                     | -                            | $\leq 1.4 \times 10^3$                                | <b>0</b>                      | $\leq 6.5 \times 10^2$                               | <b>1. x 10<sup>-4</sup></b>  | $\leq 1.2$                                              | <b>0</b>                        | -                                | -                                |
| I97V    | $1.5 \times 10^2$                 | $1.4 \times 10^{-1}$         | $8.9 \times 10^1$     | $6.0 \times 10^{-1}$         | $1.7 \times 10^6$                                     | $3.8 \times 10^{-1}$          | $4.3 \times 10^5$                                    | $7.2 \times 10^{-2}$         | $1.4 \times 10^1$                                       | $5.7 \times 10^{-1}$            | $5.7 \times 10^2$                | $2.3 \times 10^{-1}$             |
| A98G    | $5.2 \times 10^1$                 | $2.2 \times 10^{-2}$         | $6.0 \times 10^1$     | $6.1 \times 10^{-2}$         | $8.1 \times 10^5$                                     | $1.7 \times 10^{-1}$          | $2.5 \times 10^5$                                    | $3.0 \times 10^{-2}$         | $1.0 \times 10^1$                                       | $3.9 \times 10^{-2}$            | $5.3 \times 10^2$                | $1.2 \times 10^{-2}$             |
| A98V    | $1.2 \times 10^2$                 | $6.5 \times 10^{-1}$         | $8.7 \times 10^1$     | $8.2 \times 10^{-1}$         | $1.3 \times 10^6$                                     | $5.9 \times 10^{-1}$          | $4.4 \times 10^5$                                    | $8.3 \times 10^{-2}$         | $1.3 \times 10^1$                                       | $5.4 \times 10^{-1}$            | $5.0 \times 10^2$                | <b>7.0 x 10<sup>-4</sup></b>     |
| G99A    | $1.1 \times 10^2$                 | $5.3 \times 10^{-1}$         | $7.4 \times 10^1$     | $3.0 \times 10^{-1}$         | $1.0 \times 10^6$                                     | $3.0 \times 10^{-1}$          | $2.7 \times 10^5$                                    | $1.8 \times 10^{-2}$         | $1.1 \times 10^1$                                       | $6.7 \times 10^{-2}$            | $8.7 \times 10^2$                | <b>2.0 x 10<sup>-4</sup></b>     |
| G99V    | 1.3                               | <b>0</b>                     | 5.5                   | <b>0</b>                     | $1.4 \times 10^5$                                     | <b>0</b>                      | $\leq 2.1 \times 10^3$                               | <b>0</b>                     | 1.7                                                     | <b>1. x 10<sup>-4</sup></b>     | $1.0 \times 10^2$                | <b>0</b>                         |
| N100G   | 1.3                               | <b>0</b>                     | $\leq 5.0$            | <b>0</b>                     | $\geq 2.7 \times 10^5$                                | <b>0</b>                      | $1.8 \times 10^3$                                    | <b>7.0 x 10<sup>-4</sup></b> | 1.2                                                     | <b>1. x 10<sup>-4</sup></b>     | $\leq 3.7 \times 10^2$           | <b>0</b>                         |
| N100V   | 1.8                               | <b>0</b>                     | $\leq 5.0$            | <b>0</b>                     | $\geq 3.5 \times 10^5$                                | <b>2.0 x 10<sup>-4</sup></b>  | $\leq 1.7 \times 10^3$                               | <b>1. x 10<sup>-4</sup></b>  | $\leq 1.3$                                              | <b>0</b>                        | $\leq 8.1 \times 10^2$           | <b>0</b>                         |
| D101G   | $4.0 \times 10^1$                 | <b>4.6 x 10<sup>-3</sup></b> | $2.9 \times 10^1$     | <b>7.0 x 10<sup>-4</sup></b> | $1.3 \times 10^6$                                     | $7.9 \times 10^{-1}$          | $1.1 \times 10^5$                                    | <b>1.9 x 10<sup>-3</sup></b> | $2.5 \times 10^1$                                       | <b>1.1 x 10<sup>-3</sup></b>    | $7.3 \times 10^2$                | <b>6.8 x 10<sup>-3</sup></b>     |
| D101V   | $1.4 \times 10^2$                 | $2.0 \times 10^{-1}$         | $6.2 \times 10^1$     | <b>2.8 x 10<sup>-3</sup></b> | $2.3 \times 10^6$                                     | <b>1.6 x 10<sup>-3</sup></b>  | $1.7 \times 10^5$                                    | <b>1. x 10<sup>-4</sup></b>  | $1.6 \times 10^1$                                       | $8.9 \times 10^{-1}$            | $9.9 \times 10^2$                | <b>0</b>                         |
| W102G   | -                                 | -                            | -                     | -                            | $\leq 1.3 \times 10^3$                                | <b>0</b>                      | $\leq 1.3 \times 10^3$                               | <b>1. x 10<sup>-4</sup></b>  | $\leq 1.0$                                              | <b>0</b>                        | -                                | -                                |
| W102V   | 1.8                               | <b>0</b>                     | $2.5 \times 10^1$     | <b>0</b>                     | $5.7 \times 10^4$                                     | <b>0</b>                      | $3.7 \times 10^3$                                    | <b>0</b>                     | $\leq 1.3$                                              | <b>1. x 10<sup>-4</sup></b>     | $7.6 \times 10^2$                | <b>4.0 x 10<sup>-4</sup></b>     |
| Y103G   | 9.7                               | <b>0</b>                     | $2.9 \times 10^1$     | <b>0</b>                     | $2.8 \times 10^5$                                     | <b>5.0 x 10<sup>-4</sup></b>  | $2.6 \times 10^4$                                    | <b>0</b>                     | 1.9                                                     | <b>1. x 10<sup>-4</sup></b>     | $3.8 \times 10^2$                | <b>1. x 10<sup>-4</sup></b>      |
| Y103V   | $9.0 \times 10^1$                 | $1.3 \times 10^{-1}$         | $7.5 \times 10^1$     | $3.2 \times 10^{-1}$         | $1.1 \times 10^6$                                     | $3.0 \times 10^{-1}$          | $1.3 \times 10^5$                                    | <b>1. x 10<sup>-4</sup></b>  | 5.4                                                     | <b>4.8 x 10<sup>-3</sup></b>    | $4.7 \times 10^2$                | <b>0</b>                         |
| D104G   | $4.4 \times 10^1$                 | <b>2.0 x 10<sup>-3</sup></b> | $6.9 \times 10^1$     | $1.7 \times 10^{-1}$         | $6.7 \times 10^5$                                     | $5.0 \times 10^{-2}$          | $1.8 \times 10^5$                                    | <b>4.2 x 10<sup>-3</sup></b> | $1.0 \times 10^1$                                       | $4.3 \times 10^{-2}$            | $4.9 \times 10^2$                | <b>1. x 10<sup>-4</sup></b>      |
| D104V   | $1.4 \times 10^2$                 | $4.5 \times 10^{-1}$         | $9.6 \times 10^1$     | $3.5 \times 10^{-1}$         | $1.5 \times 10^6$                                     | $8.2 \times 10^{-1}$          | $1.1 \times 10^5$                                    | <b>5.8 x 10<sup>-3</sup></b> | $\leq 4.1$                                              | $1.2 \times 10^{-2}$            | $8.5 \times 10^2$                | <b>0</b>                         |
| K105G   | $1.8 \times 10^2$                 | $1.7 \times 10^{-2}$         | $7.6 \times 10^1$     | $3.9 \times 10^{-1}$         | $2.1 \times 10^6$                                     | $7.8 \times 10^{-2}$          | $5.3 \times 10^5$                                    | $5.2 \times 10^{-1}$         | $2.5 \times 10^1$                                       | <b>1.8 x 10<sup>-3</sup></b>    | $6.5 \times 10^2$                | $3.4 \times 10^{-1}$             |
| K105V   | $2.2 \times 10^2$                 | <b>8.0 x 10<sup>-4</sup></b> | $8.6 \times 10^1$     | $9.8 \times 10^{-1}$         | $2.7 \times 10^6$                                     | <b>1.0 x 10<sup>-3</sup></b>  | $6.9 \times 10^5$                                    | $5.3 \times 10^{-1}$         | $1.8 \times 10^1$                                       | $6.8 \times 10^{-1}$            | $6.2 \times 10^2$                | $7.9 \times 10^{-1}$             |
| E106G   | $1.1 \times 10^2$                 | $6.8 \times 10^{-1}$         | $6.5 \times 10^1$     | $4.3 \times 10^{-2}$         | $1.3 \times 10^6$                                     | $8.1 \times 10^{-1}$          | $2.5 \times 10^5$                                    | $1.1 \times 10^{-2}$         | $1.8 \times 10^1$                                       | $4.9 \times 10^{-1}$            | $5.4 \times 10^2$                | $4.2 \times 10^{-2}$             |
| E106V   | $5.1 \times 10^1$                 | <b>2.4 x 10<sup>-3</sup></b> | $7.8 \times 10^1$     | $4.6 \times 10^{-1}$         | $6.0 \times 10^5$                                     | $1.2 \times 10^{-2}$          | $4.8 \times 10^5$                                    | $2.8 \times 10^{-1}$         | $1.1 \times 10^1$                                       | $2.1 \times 10^{-1}$            | $5.4 \times 10^2$                | <b>7.1 x 10<sup>-3</sup></b>     |
| L107G   | $1.1 \times 10^2$                 | $4.8 \times 10^{-1}$         | $5.5 \times 10^1$     | $1.8 \times 10^{-2}$         | $2.1 \times 10^6$                                     | $1.0 \times 10^{-1}$          | $4.3 \times 10^5$                                    | $1.3 \times 10^{-1}$         | $2.6 \times 10^1$                                       | <b>9.0 x 10<sup>-4</sup></b>    | $4.5 \times 10^2$                | <b>2.0 x 10<sup>-4</sup></b>     |
| L107V   | $1.5 \times 10^2$                 | $1.7 \times 10^{-1}$         | $1.0 \times 10^2$     | $6.2 \times 10^{-2}$         | $1.5 \times 10^6$                                     | $8.8 \times 10^{-1}$          | $6.3 \times 10^5$                                    | $8.5 \times 10^{-1}$         | $1.4 \times 10^1$                                       | $5.4 \times 10^{-1}$            | $6.6 \times 10^2$                | $1.5 \times 10^{-1}$             |
| G108A   | $7.2 \times 10^1$                 | $4.0 \times 10^{-2}$         | $6.3 \times 10^1$     | $4.7 \times 10^{-2}$         | $1.3 \times 10^6$                                     | $7.7 \times 10^{-1}$          | $2.6 \times 10^5$                                    | $1.1 \times 10^{-2}$         | 7.3                                                     | <b>1.7 x 10<sup>-3</sup></b>    | $5.4 \times 10^2$                | $1.5 \times 10^{-2}$             |
| G108V   | $1.4 \times 10^2$                 | $3.2 \times 10^{-1}$         | $1.0 \times 10^2$     | $1.2 \times 10^{-1}$         | $1.4 \times 10^6$                                     | $9.4 \times 10^{-1}$          | $3.9 \times 10^5$                                    | $4.4 \times 10^{-2}$         | 9.2                                                     | $1.4 \times 10^{-1}$            | $6.6 \times 10^2$                | $2.2 \times 10^{-1}$             |
| K109G   | $2.4 \times 10^2$                 | <b>3.0 x 10<sup>-4</sup></b> | $1.0 \times 10^2$     | $1.5 \times 10^{-1}$         | $2.6 \times 10^6$                                     | <b>1.2 x 10<sup>-3</sup></b>  | $7.3 \times 10^5$                                    | $3.2 \times 10^{-1}$         | $2.2 \times 10^1$                                       | $6.5 \times 10^{-2}$            | $7.7 \times 10^2$                | <b>7.0 x 10<sup>-4</sup></b>     |
| K109V   | $1.5 \times 10^2$                 | $1.1 \times 10^{-1}$         | $8.9 \times 10^1$     | $7.2 \times 10^{-1}$         | $1.9 \times 10^6$                                     | $7.7 \times 10^{-2}$          | $5.7 \times 10^5$                                    | $8.0 \times 10^{-1}$         | $1.6 \times 10^1$                                       | $9.2 \times 10^{-1}$            | $5.9 \times 10^2$                | $4.4 \times 10^{-1}$             |
| S110G   | $1.4 \times 10^2$                 | $5.2 \times 10^{-1}$         | $7.3 \times 10^1$     | $2.9 \times 10^{-1}$         | $1.7 \times 10^6$                                     | $4.1 \times 10^{-1}$          | $6.5 \times 10^5$                                    | $7.7 \times 10^{-1}$         | $2.0 \times 10^1$                                       | $1.9 \times 10^{-1}$            | $4.5 \times 10^2$                | <b>1. x 10<sup>-4</sup></b>      |
| S110V   | $9.3 \times 10^1$                 | $1.2 \times 10^{-1}$         | $8.6 \times 10^1$     | $9.1 \times 10^{-1}$         | $1.7 \times 10^6$                                     | $4.9 \times 10^{-1}$          | $4.0 \times 10^5$                                    | $8.6 \times 10^{-2}$         | $1.2 \times 10^1$                                       | $2.6 \times 10^{-1}$            | $1.1 \times 10^3$                | <b>0</b>                         |
| V111A   | $1.4 \times 10^2$                 | $3.1 \times 10^{-1}$         | $6.6 \times 10^1$     | $2.9 \times 10^{-2}$         | $1.6 \times 10^6$                                     | $4.7 \times 10^{-1}$          | $1.8 \times 10^5$                                    | <b>6.0 x 10<sup>-4</sup></b> | $1.3 \times 10^1$                                       | $3.0 \times 10^{-1}$            | $7.1 \times 10^2$                | <b>2.1 x 10<sup>-3</sup></b>     |
| V111G   | 9.2                               | <b>2.3 x 10<sup>-3</sup></b> | $8.5 \times 10^1$     | $9.7 \times 10^{-1}$         | $1.1 \times 10^5$                                     | <b>3.7 x 10<sup>-3</sup></b>  | $1.0 \times 10^5$                                    | <b>7.0 x 10<sup>-4</sup></b> | 5.4                                                     | <b>9.0 x 10<sup>-4</sup></b>    | $2.2 \times 10^3$                | <b>0</b>                         |
| Y112G   | $1.9 \times 10^1$                 | <b>0</b>                     | $2.6 \times 10^1$     | <b>0</b>                     | $6.6 \times 10^5$                                     | <b>3.4 x 10<sup>-3</sup></b>  | $2.6 \times 10^4$                                    | <b>0</b>                     | $3.2 \times 10^1$                                       | <b>0</b>                        | $2.2 \times 10^3$                | <b>0</b>                         |
| Y112V   | $3.5 \times 10^1$                 | <b>1. x 10<sup>-4</sup></b>  | $1.3 \times 10^2$     | <b>2.0 x 10<sup>-4</sup></b> | $4.4 \times 10^5$                                     | <b>2.0 x 10<sup>-3</sup></b>  | $1.5 \times 10^4$                                    | <b>1. x 10<sup>-4</sup></b>  | 9.1                                                     | $3.8 \times 10^{-2}$            | $4.6 \times 10^3$                | <b>0</b>                         |
| C113G   | $8.9 \times 10^1$                 | $2.4 \times 10^{-1}$         | $6.4 \times 10^1$     | $1.3 \times 10^{-1}$         | $1.3 \times 10^6$                                     | $7.9 \times 10^{-1}$          | $2.1 \times 10^5$                                    | <b>4.5 x 10<sup>-3</sup></b> | $1.4 \times 10^1$                                       | $5.7 \times 10^{-1}$            | $7.2 \times 10^2$                | <b>8.4 x 10<sup>-3</sup></b>     |
| C113V   | $2.9 \times 10^2$                 | <b>0</b>                     | $9.8 \times 10^1$     | $1.7 \times 10^{-1}$         | $2.5 \times 10^6$                                     | <b>1.4 x 10<sup>-3</sup></b>  | $5.5 \times 10^5$                                    | $6.3 \times 10^{-1}$         | $2.0 \times 10^1$                                       | $3.9 \times 10^{-1}$            | $4.7 \times 10^2$                | <b>4.8 x 10<sup>-3</sup></b>     |
| T114G   | 1.3                               | <b>0</b>                     | $\leq 5.0$            | <b>0</b>                     | $\geq 2.5 \times 10^5$                                | <b>0</b>                      | $\leq 1.5 \times 10^3$                               | <b>0</b>                     | 3.5                                                     | <b>0</b>                        | $\leq 5.9 \times 10^2$           | $2.9 \times 10^{-1}$             |
| T114V   | $9.8 \times 10^1$                 | $2.4 \times 10^{-1}$         | $8.6 \times 10^1$     | $9.7 \times 10^{-1}$         | $1.4 \times 10^6$                                     | $8.3 \times 10^{-1}$          | $5.4 \times 10^5$                                    | $5.5 \times 10^{-1}$         | $4.2 \times 10^1$                                       | <b>0</b>                        | $3.6 \times 10^2$                | <b>6.0 x 10<sup>-4</sup></b>     |
| S115G   | $8.7 \times 10^1$                 | $1.4 \times 10^{-1}$         | $7.0 \times 10^1$     | $2.2 \times 10^{-1}$         | $1.5 \times 10^6$                                     | $7.4 \times 10^{-1}$          | $4.5 \times 10^5$                                    | $1.6 \times 10^{-1}$         | $2.0 \times 10^1$                                       | $1.9 \times 10^{-1}$            | $5.8 \times 10^2$                | $1.9 \times 10^{-1}$             |
| S115V   | $1.1 \times 10^2$                 | $6.5 \times 10^{-1}$         | $8.4 \times 10^1$     | $9.1 \times 10^{-1}$         | $1.1 \times 10^6$                                     | $2.6 \times 10^{-1}$          | $4.3 \times 10^5$                                    | $8.6 \times 10^{-2}$         | $1.2 \times 10^1$                                       | $2.6 \times 10^{-1}$            | $1.9 \times 10^3$                | <b>0</b>                         |
| D116G   | $8.9 \times 10^{-2}$              | <b>4.0 x 10<sup>-4</sup></b> | $\leq 5.0$            | <b>0</b>                     | $\geq 1.8 \times 10^4$                                | <b>1.8 x 10<sup>-3</sup></b>  | $\leq 1.2 \times 10^3$                               | <b>0</b>                     | $\leq 1.3$                                              | <b>0</b>                        | $\leq 5.3 \times 10^2$           | $2.1 \times 10^{-1}$             |
| D116V   | 7.1                               | <b>0</b>                     | $4.1 \times 10^1$     | <b>8.0 x 10<sup>-4</sup></b> | $2.1 \times 10^5$                                     | <b>8.0 x 10<sup>-4</sup></b>  | $\leq 9.1 \times 10^3$                               | <b>4.0 x 10<sup>-4</sup></b> | $\leq 1.3$                                              | <b>2.0 x 10<sup>-4</sup></b>    | -                                | -                                |
| E117G   | $6.9 \times 10^1$                 | $2.5 \times 10^{-2}$         | $6.1 \times 10^1$     | $2.1 \times 10^{-2}$         | $1.8 \times 10^6$                                     | $2.2 \times 10^{-1}$          | $3.8 \times 10^5$                                    | $7.0 \times 10^{-2}$         | $1.9 \times 10^1$                                       | $3.6 \times 10^{-1}$            | $5.6 \times 10^2$                | $6.8 \times 10^{-2}$             |
| E117V   | $1.6 \times 10^2$                 | $5.2 \times 10^{-2}$         | $9.4 \times 10^1$     | $3.3 \times 10^{-1}$         | $1.7 \times 10^6$                                     | $4.0 \times 10^{-1}$          | $5.3 \times 10^5$                                    | $4.8 \times 10^{-1}$         | $1.3 \times 10^1$                                       | $4.9 \times 10^{-1}$            | $6.5 \times 10^2$                | $2.4 \times 10^{-1}$             |
| T118G   | $1.0 \times 10^2$                 | $4.0 \times 10^{-1}$         | $6.4 \times 10^1$     | $7.0 \times 10^{-2}$         | $1.9 \times 10^6$                                     | $1.9 \times 10^{-1}$          | $4.7 \times 10^5$                                    | $1.6 \times 10^{-1}$         | $1.3 \times 10^1$                                       | $3.7 \times 10^{-1}$            | $5.4 \times 10^2$                | $1.2 \times 10^{-1}$             |
| T118V   | $1.5 \times 10^2$                 | $1.2 \times 10^{-1}$         | $9.1 \times 10^1$     | $5.4 \times 10^{-1}$         | $1.6 \times 10^6$                                     | $6.2 \times 10^{-1}$          | $4.9 \times 10^5$                                    | $3.1 \times 10^{-1}$         | $1.4 \times 10^1$                                       | $5.5 \times 10^{-1}$            | $6.0 \times 10^2$                | $6.6 \times 10^{-1}$             |
| V119A   | $2.3 \times 10^2$                 | <b>0</b>                     | $9.3 \times 10^1$     | $4.2 \times 10^{-1}$         | $1.8 \times 10^6$                                     | $2.1 \times 10^{-1}$          | $6.1 \times 10^5$                                    | $9.6 \times 10^{-1}$         | $2.2 \times 10^1$                                       | $8.7 \times 10^{-2}$            | $7.2 \times 10^2$                | $1.4 \times 10^{-2}$             |
| V119G   | 7.7                               | <b>3.2 x 10<sup>-3</sup></b> | $7.8 \times 10^1$     | $6.0 \times 10^{-1}$         | $1.0 \times 10^5$                                     | <b>4.5 x 10<sup>-3</sup></b>  | $8.2 \times 10^4$                                    | <b>8.0 x 10<sup>-4</sup></b> | 6.5                                                     | <b>2.9 x 10<sup>-3</sup></b>    | $7.4 \times 10^2$                | $1.5 \times 10^{-2}$             |
| Q120G   | $1.1 \times 10^2$                 | $5.5 \times 10^{-1}$         | $7.1 \times 10^1$     | $2.7 \times 10^{-1}$         | $2.0 \times 10^6$                                     | $1.9 \times 10^{-1}$          | $5.2 \times 10^5$                                    | $3.6 \times 10^{-1}$         | $2.1 \times 10^1$                                       | $1.6 \times 10^{-1}$            | $5.6 \times 10^2$                | $1.1 \times 10^{-1}$             |
| Q120V   | $1.6 \times 10^2$                 | $3.2 \times 10^{-2}$         | $9.7 \times 10^1$     | $2.1 \times 10^{-1}$         | $1.5 \times 10^6$                                     | $7.2 \times 10^{-1}$          | $5.3 \times 10^5$                                    | $2.9 \times 10^{-1}$         | $1.2 \times 10^1$                                       | $2.0 \times 10^{-1}$            | $6.8 \times 10^2$                | $1.4 \times 10^{-2}$             |
| P121G   | $8.9 \times 10^1$                 | $2.5 \times 10^{-1}$         | $4.8 \times 10^1$     | <b>9.8 x 10<sup>-3</sup></b> | $1.7 \times 10^6$                                     | $5.3 \times 10^{-1}$          | $1.1 \times 10^6$                                    | <b>6.6 x 10<sup>-3</sup></b> | $1.4 \times 10^1$                                       | $5.0 \times 10^{-1}$            | $5.6 \times 10^2$                | $2.0 \times 10^{-1}$             |
| P121V   | $8.9 \times 10^1$                 | $8.0 \times 10^{-2}$         | $8.0 \times 10^1$     | $5.6 \times 10^{-1}$         | $1.0 \times 10^6$                                     | $2.0 \times 10^{-1}$          | $5.4 \times 10^5$                                    | $4.2 \times 10^{-1}$         | $1.5 \times 10^1$                                       | $7.1 \times 10^{-1}$            | $6.2 \times 10^2$                | $5.9 \times 10^{-1}$             |
| V122A   | $1.5 \times 10^2$                 | $2.6 \times 10^{-1}$         | $9.4 \times 10^1$     | $4.8 \times 10^{-1}$         | $1.6 \times 10^6$                                     | $7.3 \times 10^{-1}$          | $2.3 \times 10^5$                                    | <b>6.8 x 10<sup>-3</sup></b> | $1.2 \times 10^1$                                       | $2.8 \times 10^{-1}$            | $6.0 \times 10^2$                | $6.2 \times 10^{-1}$             |
| V122G   | 2.4                               | <b>0</b>                     | 5.1                   | <b>0</b>                     | $3.9 \times 10^5$                                     | <b>2.0 x 10<sup>-4</sup></b>  | $2.9 \times 10^4$                                    | <b>1. x 10<sup>-4</sup></b>  | 2.5                                                     | <b>0</b>                        | $2.4 \times 10^2$                | <b>0</b>                         |
| G123A   | $9.1 \times 10^1$                 | $3.1 \times 10^{-1}$         | $6.2 \times 10^1$     | $1.3 \times 10^{-1}$         | $1.3 \times 10^6$                                     | $8.2 \times 10^{-1}$          |                                                      |                              |                                                         |                                 |                                  |                                  |

| Variant | $k_{cat}$ cMUP (s <sup>-1</sup> ) | $k_{cat}$ cMUP $p$ -value | $K_M$ cMUP ( $\mu$ M) | $K_M$ cMUP $p$ -value | $k_{cat}/K_M$ cMUP (M <sup>-1</sup> s <sup>-1</sup> ) | $k_{cat}/K_M$ cMUP $p$ -value | $k_{cat}/K_M$ MeP (M <sup>-1</sup> s <sup>-1</sup> ) | $k_{cat}/K_M$ MeP $p$ -value | $k_{cat}/K_M$ MecMUP (M <sup>-1</sup> s <sup>-1</sup> ) | $k_{cat}/K_M$ MecMUP $p$ -value | $K_i$ PO <sub>4</sub> ( $\mu$ M) | $K_i$ PO <sub>4</sub> $p$ -value |
|---------|-----------------------------------|---------------------------|-----------------------|-----------------------|-------------------------------------------------------|-------------------------------|------------------------------------------------------|------------------------------|---------------------------------------------------------|---------------------------------|----------------------------------|----------------------------------|
| R135G   | 2.5×10 <sup>2</sup>               | 0                         | 7.7×10 <sup>1</sup>   | 4.3×10 <sup>-1</sup>  | 3.2×10 <sup>6</sup>                                   | 0                             | 5.4×10 <sup>5</sup>                                  | 5.6×10 <sup>-1</sup>         | 3.6×10 <sup>1</sup>                                     | 0                               | 5.9×10 <sup>2</sup>              | 3.7×10 <sup>-1</sup>             |
| R135V   | 2.3×10 <sup>2</sup>               | 0                         | 1.1×10 <sup>2</sup>   | 5.3×10 <sup>-2</sup>  | 1.9×10 <sup>6</sup>                                   | 1.4×10 <sup>-1</sup>          | 8.4×10 <sup>5</sup>                                  | 4.1×10 <sup>-2</sup>         | 2.3×10 <sup>1</sup>                                     | 5.8×10 <sup>-2</sup>            | 7.0×10 <sup>2</sup>              | 3.4×10 <sup>-2</sup>             |
| N136G   | 4.7×10 <sup>1</sup>               | 1.0×10 <sup>-3</sup>      | 6.1×10 <sup>1</sup>   | 2.3×10 <sup>-2</sup>  | 8.6×10 <sup>5</sup>                                   | 9.8×10 <sup>-2</sup>          | 3.4×10 <sup>5</sup>                                  | 3.6×10 <sup>-2</sup>         | 1.1×10 <sup>1</sup>                                     | 1.9×10 <sup>-1</sup>            | 5.8×10 <sup>2</sup>              | 3.2×10 <sup>-1</sup>             |
| N136V   | 2.3×10 <sup>1</sup>               | 1.×10 <sup>-4</sup>       | 7.5×10 <sup>1</sup>   | 3.7×10 <sup>-1</sup>  | 4.8×10 <sup>5</sup>                                   | 1.4×10 <sup>-2</sup>          | 1.8×10 <sup>5</sup>                                  | 2.0×10 <sup>-3</sup>         | 5.6                                                     | 4.9×10 <sup>-3</sup>            | 7.0×10 <sup>2</sup>              | 4.3×10 <sup>-2</sup>             |
| L137G   | 2.1×10 <sup>1</sup>               | 4.1×10 <sup>-3</sup>      | 4.8×10 <sup>1</sup>   | 1.1×10 <sup>-2</sup>  | 3.6×10 <sup>5</sup>                                   | 1.3×10 <sup>-2</sup>          | 7.3×10 <sup>4</sup>                                  | 4.8×10 <sup>-3</sup>         | 8.1                                                     | 1.2×10 <sup>-2</sup>            | 4.7×10 <sup>2</sup>              | 3.8×10 <sup>-3</sup>             |
| L137V   | 1.5×10 <sup>2</sup>               | 7.7×10 <sup>-2</sup>      | 1.1×10 <sup>2</sup>   | 1.6×10 <sup>-2</sup>  | 1.5×10 <sup>6</sup>                                   | 7.6×10 <sup>-1</sup>          | 5.0×10 <sup>5</sup>                                  | 2.7×10 <sup>-1</sup>         | 1.6×10 <sup>1</sup>                                     | 9.7×10 <sup>-1</sup>            | 7.0×10 <sup>2</sup>              | 1.1×10 <sup>-2</sup>             |
| W138G   | 1.6×10 <sup>1</sup>               | 0                         | 5.0×10 <sup>1</sup>   | 1.×10 <sup>-4</sup>   | 4.7×10 <sup>5</sup>                                   | 1.2×10 <sup>-3</sup>          | 1.0×10 <sup>5</sup>                                  | 0                            | 4.7                                                     | 0                               | 4.3×10 <sup>2</sup>              | 0                                |
| W138V   | 3.5×10 <sup>1</sup>               | 1.×10 <sup>-4</sup>       | 7.2×10 <sup>1</sup>   | 1.9×10 <sup>-1</sup>  | 5.1×10 <sup>5</sup>                                   | 6.3×10 <sup>-3</sup>          | 9.5×10 <sup>4</sup>                                  | 4.0×10 <sup>-4</sup>         | 4.7                                                     | 2.4×10 <sup>-3</sup>            | 5.3×10 <sup>2</sup>              | 1.3×10 <sup>-2</sup>             |
| S139G   | 3.7×10 <sup>1</sup>               | 4.0×10 <sup>-3</sup>      | 4.3×10 <sup>1</sup>   | 4.2×10 <sup>-3</sup>  | 4.9×10 <sup>5</sup>                                   | 2.5×10 <sup>-2</sup>          | 2.5×10 <sup>5</sup>                                  | 9.1×10 <sup>-3</sup>         | 1.0×10 <sup>1</sup>                                     | 6.8×10 <sup>-2</sup>            | 4.0×10 <sup>2</sup>              | 1.0×10 <sup>-3</sup>             |
| S139V   | 1.4×10 <sup>2</sup>               | 4.9×10 <sup>-1</sup>      | 8.4×10 <sup>1</sup>   | 8.9×10 <sup>-1</sup>  | 1.7×10 <sup>6</sup>                                   | 4.9×10 <sup>-1</sup>          | 4.0×10 <sup>5</sup>                                  | 1.2×10 <sup>-1</sup>         | 1.2×10 <sup>1</sup>                                     | 3.0×10 <sup>-1</sup>            | 5.9×10 <sup>2</sup>              | 3.5×10 <sup>-1</sup>             |
| T140G   | 2.0×10 <sup>1</sup>               | 4.0×10 <sup>-4</sup>      | 5.0×10 <sup>1</sup>   | 5.0×10 <sup>-3</sup>  | 5.4×10 <sup>5</sup>                                   | 1.7×10 <sup>-2</sup>          | 1.3×10 <sup>5</sup>                                  | 1.8×10 <sup>-3</sup>         | 6.8                                                     | 9.0×10 <sup>-4</sup>            | 4.4×10 <sup>2</sup>              | 2.0×10 <sup>-4</sup>             |
| T140V   | 4.4×10 <sup>1</sup>               | 5.0×10 <sup>-4</sup>      | 7.8×10 <sup>1</sup>   | 3.9×10 <sup>-1</sup>  | 5.2×10 <sup>5</sup>                                   | 4.0×10 <sup>-3</sup>          | 2.2×10 <sup>5</sup>                                  | 4.8×10 <sup>-3</sup>         | 1.0×10 <sup>1</sup>                                     | 1.7×10 <sup>-1</sup>            | 5.0×10 <sup>2</sup>              | 1.9×10 <sup>-3</sup>             |
| T141G   | 2.6×10 <sup>1</sup>               | 0                         | 5.2×10 <sup>1</sup>   | 2.6×10 <sup>-3</sup>  | 7.8×10 <sup>5</sup>                                   | 5.6×10 <sup>-2</sup>          | 2.0×10 <sup>5</sup>                                  | 5.4×10 <sup>-3</sup>         | 8.3                                                     | 6.9×10 <sup>-3</sup>            | 4.6×10 <sup>2</sup>              | 3.0×10 <sup>-4</sup>             |
| T141V   | 1.1×10 <sup>2</sup>               | 5.4×10 <sup>-1</sup>      | 7.9×10 <sup>1</sup>   | 4.5×10 <sup>-1</sup>  | 1.5×10 <sup>6</sup>                                   | 6.9×10 <sup>-1</sup>          | 9.3×10 <sup>4</sup>                                  | 4.2×10 <sup>-3</sup>         | 7.6                                                     | 2.0×10 <sup>-2</sup>            | 5.5×10 <sup>2</sup>              | 8.9×10 <sup>-2</sup>             |
| V142A   | 1.4×10 <sup>2</sup>               | 3.9×10 <sup>-1</sup>      | 9.7×10 <sup>1</sup>   | 2.2×10 <sup>-1</sup>  | 1.5×10 <sup>6</sup>                                   | 8.8×10 <sup>-1</sup>          | 2.0×10 <sup>5</sup>                                  | 3.0×10 <sup>-4</sup>         | 1.1×10 <sup>1</sup>                                     | 1.3×10 <sup>-1</sup>            | 5.6×10 <sup>2</sup>              | 2.9×10 <sup>-2</sup>             |
| V142G   | 1.2×10 <sup>1</sup>               | 0                         | 5.6×10 <sup>1</sup>   | 7.4×10 <sup>-3</sup>  | 2.3×10 <sup>5</sup>                                   | 3.0×10 <sup>-4</sup>          | 1.0×10 <sup>5</sup>                                  | 1.×10 <sup>-4</sup>          | 2.7                                                     | 2.0×10 <sup>-4</sup>            | 4.7×10 <sup>2</sup>              | 0                                |
| T143G   | 6.3×10 <sup>1</sup>               | 2.6×10 <sup>-2</sup>      | 7.6×10 <sup>1</sup>   | 3.7×10 <sup>-1</sup>  | 8.5×10 <sup>5</sup>                                   | 1.3×10 <sup>-1</sup>          | 3.5×10 <sup>5</sup>                                  | 3.5×10 <sup>-2</sup>         | 1.2×10 <sup>1</sup>                                     | 3.3×10 <sup>-1</sup>            | 6.2×10 <sup>2</sup>              | 8.4×10 <sup>-1</sup>             |
| T143V   | 8.6×10 <sup>1</sup>               | 5.4×10 <sup>-2</sup>      | 7.7×10 <sup>1</sup>   | 3.8×10 <sup>-1</sup>  | 1.2×10 <sup>6</sup>                                   | 5.4×10 <sup>-1</sup>          | 2.8×10 <sup>5</sup>                                  | 3.6×10 <sup>-3</sup>         | 8.1                                                     | 3.1×10 <sup>-2</sup>            | 6.3×10 <sup>2</sup>              | 5.5×10 <sup>-1</sup>             |
| D144G   | 1.5×10 <sup>1</sup>               | 0                         | 6.7×10 <sup>1</sup>   | 3.0×10 <sup>-2</sup>  | 2.4×10 <sup>5</sup>                                   | 0                             | 4.2×10 <sup>4</sup>                                  | 0                            | ≤ 1.2                                                   | 0                               | 5.3×10 <sup>2</sup>              | 1.8×10 <sup>-3</sup>             |
| D144V   | 6.2×10 <sup>-1</sup>              | 0                         | 6.2×10 <sup>1</sup>   | 4.4×10 <sup>-2</sup>  | 9.5×10 <sup>3</sup>                                   | 6.0×10 <sup>-4</sup>          | ≤ 1.3×10 <sup>3</sup>                                | 1.×10 <sup>-4</sup>          | ≤ 1.3                                                   | 0                               | 3.7×10 <sup>2</sup>              | 1.×10 <sup>-4</sup>              |
| Q145G   | 7.4×10 <sup>1</sup>               | 1.0×10 <sup>-1</sup>      | 3.9×10 <sup>1</sup>   | 1.9×10 <sup>-3</sup>  | 1.9×10 <sup>6</sup>                                   | 2.5×10 <sup>-1</sup>          | 4.3×10 <sup>5</sup>                                  | 1.4×10 <sup>-1</sup>         | 1.1×10 <sup>1</sup>                                     | 9.6×10 <sup>-2</sup>            | 3.4×10 <sup>2</sup>              | 1.4×10 <sup>-2</sup>             |
| Q145V   | 1.2×10 <sup>2</sup>               | 9.3×10 <sup>-1</sup>      | 7.4×10 <sup>1</sup>   | 4.7×10 <sup>-1</sup>  | 1.6×10 <sup>6</sup>                                   | 7.6×10 <sup>-1</sup>          | 3.3×10 <sup>5</sup>                                  | 2.9×10 <sup>-2</sup>         | 8.9                                                     | 3.3×10 <sup>-2</sup>            | 5.1×10 <sup>2</sup>              | 2.9×10 <sup>-3</sup>             |
| L146G   | 6.7                               | 0                         | 5.6×10 <sup>1</sup>   | 2.0×10 <sup>-4</sup>  | 1.4×10 <sup>5</sup>                                   | 0                             | 1.5×10 <sup>4</sup>                                  | 0                            | ≤ 1.3                                                   | 0                               | 4.0×10 <sup>2</sup>              | 0                                |
| L146V   | 1.8×10 <sup>2</sup>               | 1.9×10 <sup>-2</sup>      | 8.7×10 <sup>1</sup>   | 8.6×10 <sup>-1</sup>  | 2.3×10 <sup>6</sup>                                   | 8.4×10 <sup>-3</sup>          | 3.9×10 <sup>5</sup>                                  | 6.2×10 <sup>-2</sup>         | 1.1×10 <sup>1</sup>                                     | 1.5×10 <sup>-1</sup>            | 6.6×10 <sup>2</sup>              | 1.2×10 <sup>-1</sup>             |
| G147A   | 9.1×10 <sup>1</sup>               | 1.9×10 <sup>-1</sup>      | 7.1×10 <sup>1</sup>   | 2.8×10 <sup>-1</sup>  | 9.8×10 <sup>5</sup>                                   | 2.2×10 <sup>-1</sup>          | 3.5×10 <sup>5</sup>                                  | 5.6×10 <sup>-2</sup>         | 1.7×10 <sup>1</sup>                                     | 8.4×10 <sup>-1</sup>            | 5.1×10 <sup>2</sup>              | 3.2×10 <sup>-2</sup>             |
| G147V   | 1.1×10 <sup>2</sup>               | 5.3×10 <sup>-1</sup>      | 9.7×10 <sup>1</sup>   | 2.4×10 <sup>-1</sup>  | 1.2×10 <sup>6</sup>                                   | 4.3×10 <sup>-1</sup>          | 3.1×10 <sup>5</sup>                                  | 1.1×10 <sup>-2</sup>         | 8.4                                                     | 2.0×10 <sup>-2</sup>            | 6.2×10 <sup>2</sup>              | 6.5×10 <sup>-1</sup>             |
| L148G   | 1.5×10 <sup>1</sup>               | 1.×10 <sup>-4</sup>       | 5.8×10 <sup>1</sup>   | 2.9×10 <sup>-2</sup>  | 2.0×10 <sup>5</sup>                                   | 1.5×10 <sup>-3</sup>          | 1.1×10 <sup>5</sup>                                  | 1.5×10 <sup>-2</sup>         | ≤ 8.9×10 <sup>-1</sup>                                  | 0                               | 3.9×10 <sup>2</sup>              | 0                                |
| L148V   | 6.1×10 <sup>1</sup>               | 8.5×10 <sup>-3</sup>      | 8.5×10 <sup>1</sup>   | 9.5×10 <sup>-1</sup>  | 7.7×10 <sup>5</sup>                                   | 5.1×10 <sup>-2</sup>          | 1.6×10 <sup>5</sup>                                  | 2.7×10 <sup>-3</sup>         | 7.1                                                     | 1.6×10 <sup>-2</sup>            | 6.4×10 <sup>2</sup>              | 4.4×10 <sup>-1</sup>             |
| A149G   | 1.2×10 <sup>2</sup>               | 6.8×10 <sup>-1</sup>      | 6.4×10 <sup>1</sup>   | 6.7×10 <sup>-2</sup>  | 1.7×10 <sup>6</sup>                                   | 4.9×10 <sup>-1</sup>          | 2.7×10 <sup>5</sup>                                  | 4.1×10 <sup>-2</sup>         | 1.9×10 <sup>1</sup>                                     | 4.7×10 <sup>-1</sup>            | 6.2×10 <sup>2</sup>              | 6.4×10 <sup>-1</sup>             |
| A149V   | 3.7×10 <sup>1</sup>               | 8.0×10 <sup>-4</sup>      | 7.2×10 <sup>1</sup>   | 2.3×10 <sup>-1</sup>  | 5.2×10 <sup>5</sup>                                   | 1.1×10 <sup>-2</sup>          | 3.3×10 <sup>5</sup>                                  | 1.4×10 <sup>-2</sup>         | 6.8                                                     | 1.1×10 <sup>-2</sup>            | 4.5×10 <sup>2</sup>              | 7.0×10 <sup>-4</sup>             |
| T150G   | 6.4×10 <sup>1</sup>               | 4.9×10 <sup>-2</sup>      | 6.3×10 <sup>1</sup>   | 8.3×10 <sup>-2</sup>  | 1.4×10 <sup>6</sup>                                   | 9.1×10 <sup>-1</sup>          | 3.2×10 <sup>5</sup>                                  | 2.5×10 <sup>-2</sup>         | 1.0×10 <sup>1</sup>                                     | 9.0×10 <sup>-2</sup>            | 5.0×10 <sup>2</sup>              | 1.3×10 <sup>-3</sup>             |
| T150V   | 9.2×10 <sup>1</sup>               | 1.1×10 <sup>-1</sup>      | 8.1×10 <sup>1</sup>   | 5.6×10 <sup>-1</sup>  | 1.2×10 <sup>6</sup>                                   | 3.8×10 <sup>-1</sup>          | 2.6×10 <sup>5</sup>                                  | 3.1×10 <sup>-3</sup>         | 8.8                                                     | 5.4×10 <sup>-2</sup>            | 5.6×10 <sup>2</sup>              | 5.8×10 <sup>-2</sup>             |
| N151G   | 9.4                               | 4.0×10 <sup>-4</sup>      | 6.4×10 <sup>1</sup>   | 1.1×10 <sup>-1</sup>  | 1.7×10 <sup>5</sup>                                   | 3.4×10 <sup>-3</sup>          | 1.8×10 <sup>4</sup>                                  | 0                            | ≤ 1.2                                                   | 0                               | 3.7×10 <sup>2</sup>              | 1.6×10 <sup>-3</sup>             |
| N151V   | 1.2×10 <sup>2</sup>               | 8.3×10 <sup>-1</sup>      | 9.0×10 <sup>1</sup>   | 6.0×10 <sup>-1</sup>  | 1.3×10 <sup>6</sup>                                   | 8.0×10 <sup>-1</sup>          | 1.5×10 <sup>5</sup>                                  | 3.1×10 <sup>-3</sup>         | 1.2×10 <sup>1</sup>                                     | 3.5×10 <sup>-1</sup>            | 6.1×10 <sup>2</sup>              | 9.1×10 <sup>-1</sup>             |
| F152G   | 3.7×10 <sup>1</sup>               | 3.0×10 <sup>-4</sup>      | 6.0×10 <sup>1</sup>   | 2.1×10 <sup>-2</sup>  | 4.3×10 <sup>5</sup>                                   | 3.4×10 <sup>-3</sup>          | 1.5×10 <sup>5</sup>                                  | 8.6×10 <sup>-3</sup>         | 8.9                                                     | 3.8×10 <sup>-2</sup>            | 5.4×10 <sup>2</sup>              | 2.2×10 <sup>-2</sup>             |
| F152V   | 7.5                               | 1.5×10 <sup>-3</sup>      | 7.6×10 <sup>1</sup>   | 4.9×10 <sup>-1</sup>  | 9.9×10 <sup>4</sup>                                   | 2.6×10 <sup>-3</sup>          | 1.0×10 <sup>5</sup>                                  | 4.0×10 <sup>-4</sup>         | ≤ 1.3                                                   | 4.0×10 <sup>-4</sup>            | 5.1×10 <sup>2</sup>              | 1.5×10 <sup>-2</sup>             |
| T153G   | 9.2×10 <sup>1</sup>               | 1.3×10 <sup>-1</sup>      | 6.5×10 <sup>1</sup>   | 5.5×10 <sup>-2</sup>  | 1.4×10 <sup>6</sup>                                   | 8.5×10 <sup>-1</sup>          | 3.5×10 <sup>5</sup>                                  | 4.2×10 <sup>-2</sup>         | 2.0×10 <sup>1</sup>                                     | 3.6×10 <sup>-1</sup>            | 5.3×10 <sup>2</sup>              | 1.5×10 <sup>-2</sup>             |
| T153V   | 1.9×10 <sup>2</sup>               | 1.4×10 <sup>-3</sup>      | 9.2×10 <sup>1</sup>   | 4.4×10 <sup>-1</sup>  | 2.0×10 <sup>6</sup>                                   | 6.6×10 <sup>-2</sup>          | 4.0×10 <sup>5</sup>                                  | 1.0×10 <sup>-1</sup>         | 1.8×10 <sup>1</sup>                                     | 6.7×10 <sup>-1</sup>            | 6.7×10 <sup>2</sup>              | 1.2×10 <sup>-1</sup>             |
| S154G   | 8.9×10 <sup>1</sup>               | 1.9×10 <sup>-1</sup>      | 7.5×10 <sup>1</sup>   | 3.5×10 <sup>-1</sup>  | 1.6×10 <sup>6</sup>                                   | 7.6×10 <sup>-1</sup>          | 5.2×10 <sup>5</sup>                                  | 4.4×10 <sup>-1</sup>         | 1.4×10 <sup>1</sup>                                     | 4.8×10 <sup>-1</sup>            | 5.8×10 <sup>2</sup>              | 3.8×10 <sup>-1</sup>             |
| S154V   | 3.5×10 <sup>1</sup>               | 8.0×10 <sup>-4</sup>      | 7.9×10 <sup>1</sup>   | 5.8×10 <sup>-1</sup>  | 4.7×10 <sup>5</sup>                                   | 1.2×10 <sup>-2</sup>          | 8.6×10 <sup>4</sup>                                  | 1.0×10 <sup>-3</sup>         | 3.9                                                     | 1.9×10 <sup>-3</sup>            | 5.3×10 <sup>2</sup>              | 8.5×10 <sup>-3</sup>             |
| K155G   | 4.2×10 <sup>1</sup>               | 1.5×10 <sup>-3</sup>      | 7.3×10 <sup>1</sup>   | 3.0×10 <sup>-1</sup>  | 6.3×10 <sup>5</sup>                                   | 3.4×10 <sup>-2</sup>          | 2.2×10 <sup>5</sup>                                  | 5.5×10 <sup>-3</sup>         | 6.5                                                     | 1.8×10 <sup>-3</sup>            | 5.4×10 <sup>2</sup>              | 3.0×10 <sup>-2</sup>             |
| K155V   | 5.9×10 <sup>1</sup>               | 1.2×10 <sup>-2</sup>      | 9.0×10 <sup>1</sup>   | 6.9×10 <sup>-1</sup>  | 5.3×10 <sup>5</sup>                                   | 1.6×10 <sup>-2</sup>          | 3.6×10 <sup>5</sup>                                  | 2.4×10 <sup>-2</sup>         | ≤ 2.3                                                   | 2.9×10 <sup>-3</sup>            | 5.9×10 <sup>2</sup>              | 3.7×10 <sup>-1</sup>             |
| V156A   | 1.3×10 <sup>2</sup>               | 5.7×10 <sup>-1</sup>      | 8.3×10 <sup>1</sup>   | 7.8×10 <sup>-1</sup>  | 1.5×10 <sup>6</sup>                                   | 6.9×10 <sup>-1</sup>          | 2.5×10 <sup>5</sup>                                  | 1.0×10 <sup>-2</sup>         | 1.2×10 <sup>1</sup>                                     | 2.5×10 <sup>-1</sup>            | 5.9×10 <sup>2</sup>              | 5.4×10 <sup>-1</sup>             |
| V156G   | 1.0×10 <sup>2</sup>               | 4.2×10 <sup>-1</sup>      | 6.9×10 <sup>1</sup>   | 2.7×10 <sup>-1</sup>  | 1.3×10 <sup>6</sup>                                   | 7.8×10 <sup>-1</sup>          | 1.6×10 <sup>5</sup>                                  | 2.2×10 <sup>-3</sup>         | ≤ 2.8                                                   | 0                               | 5.0×10 <sup>2</sup>              | 4.5×10 <sup>-3</sup>             |
| V157A   | 5.7×10 <sup>1</sup>               | 1.4×10 <sup>-2</sup>      | 9.0×10 <sup>1</sup>   | 6.5×10 <sup>-1</sup>  | 5.5×10 <sup>5</sup>                                   | 1.9×10 <sup>-2</sup>          | 3.2×10 <sup>5</sup>                                  | 1.2×10 <sup>-2</sup>         | 1.0×10 <sup>1</sup>                                     | 1.2×10 <sup>-1</sup>            | 5.7×10 <sup>2</sup>              | 1.4×10 <sup>-1</sup>             |
| V157G   | 1.6×10 <sup>1</sup>               | 0                         | 6.0×10 <sup>1</sup>   | 6.2×10 <sup>-3</sup>  | 2.7×10 <sup>5</sup>                                   | 3.0×10 <sup>-4</sup>          | 3.6×10 <sup>4</sup>                                  | 0                            | 1.9                                                     | 4.0×10 <sup>-4</sup>            | 5.7×10 <sup>2</sup>              | 8.3×10 <sup>-2</sup>             |
| G158A   | 1.0×10 <sup>2</sup>               | 3.3×10 <sup>-1</sup>      | 6.4×10 <sup>1</sup>   | 8.3×10 <sup>-2</sup>  | 8.1×10 <sup>5</sup>                                   | 1.1×10 <sup>-1</sup>          | 4.5×10 <sup>5</sup>                                  | 2.9×10 <sup>-1</sup>         | 1.6×10 <sup>1</sup>                                     | 9.4×10 <sup>-1</sup>            | 5.5×10 <sup>2</sup>              | 8.1×10 <sup>-2</sup>             |
| G158V   | 1.6×10 <sup>1</sup>               | 0                         | 6.6×10 <sup>1</sup>   | 4.4×10 <sup>-2</sup>  | 2.3×10 <sup>5</sup>                                   | 1.×10 <sup>-4</sup>           | 6.0×10 <sup>4</sup>                                  | 4.0×10 <sup>-4</sup>         | 1.1                                                     | 1.×10 <sup>-4</sup>             | 3.9×10 <sup>2</sup>              | 0                                |
| V159A   | 1.4×10 <sup>2</sup>               | 3.6×10 <sup>-1</sup>      | 8.7×10 <sup>1</sup>   | 8.8×10 <sup>-1</sup>  | 1.7×10 <sup>6</sup>                                   | 4.5×10 <sup>-1</sup>          | 9.1×10 <sup>4</sup>                                  | 0                            | 1.0×10 <sup>1</sup>                                     | 1.6×10 <sup>-1</sup>            | 5.9×10 <sup>2</sup>              | 5.5×10 <sup>-1</sup>             |
| V159G   | 6.8×10 <sup>1</sup>               | 7.9×10 <sup>-2</sup>      | 6.7×10 <sup>1</sup>   | 1.9×10 <sup>-1</sup>  | 9.7×10 <sup>5</sup>                                   | 3.1×10 <sup>-1</sup>          | 3.3×10 <sup>5</sup>                                  | 3.7×10 <sup>-2</sup>         | 1.4×10 <sup>1</sup>                                     | 4.9×10 <sup>-1</sup>            | 5.0×10 <sup>2</sup>              | 2.4×10 <sup>-2</sup>             |
| S160G   | 4.1×10 <sup>1</sup>               | 3.0×10 <sup>-4</sup>      | 4.3×10 <sup>1</sup>   | 4.0×10 <sup>-4</sup>  | 1.1×10 <sup>6</sup>                                   | 4.2×10 <sup>-1</sup>          | 8.6×10 <sup>5</sup>                                  | 1.0×10 <sup>-1</sup>         | 1.2×10 <sup>1</sup>                                     | 1.6×10 <sup>-1</sup>            | 3.8×10 <sup>2</sup>              | 0                                |
| S160V   | -                                 | -                         | -                     | -                     | ≤ 1.3×10 <sup>3</sup>                                 | 0                             | ≤ 7.1×10 <sup>2</sup>                                | 5.0×10 <sup>-4</sup>         | ≤ 1.0                                                   | 0                               | -                                | -                                |
| L161G   | 2.6×10 <sup>1</sup>               | 0                         | 1.1×10 <sup>2</sup>   | 6.0×10 <sup>-3</sup>  | 2.6×10 <sup>5</sup>                                   | 0                             | 1.4×10 <sup>4</sup>                                  | 1.×10 <sup>-4</sup>          | 3.8                                                     | 6.0×10 <sup>-4</sup>            | 1.5×10 <sup>3</sup>              | 0                                |
| L161V   | 2.7×10 <sup>2</sup>               | 0                         | 1.0×10 <sup>2</sup>   | 8.3×10 <sup>-2</sup>  | 2.6×10 <sup>6</sup>                                   | 6.0×10 <sup>-4</sup>          | 4.8×10 <sup>5</sup>                                  | 1.1×10 <sup>-1</sup>         | 2.1×10 <sup>1</sup>                                     | 1.3×10 <sup>-1</sup>            | 7.2×10 <sup>2</sup>              | 3.3×10 <sup>-3</sup>             |
| K162G   | 2.8×10 <sup>-2</sup>              | 0                         | 1.0×10 <sup>2</sup>   | 2.2×10 <sup>-1</sup>  | 2.8×10 <sup>2</sup>                                   | 1.×10 <sup>-4</sup>           | ≤ 1.2×10 <sup>3</sup>                                | 0                            | 8.8×10 <sup>1</sup>                                     | 0                               | -                                | -                                |
| K162V   | 3.1×10 <sup>-2</sup>              | 0                         | 4.6×10 <sup>1</sup>   | 2.3×10 <sup>-3</sup>  | 6.7×10 <sup>2</sup>                                   | 4.0×10 <sup>-4</sup>          | ≤ 1.2×10 <sup>3</sup>                                | 0                            | 5.2×10 <sup>2</sup>                                     | 0                               | 2.3×10 <sup>3</sup>              | 1.×10 <sup>-4</sup>              |
| D163G   | 1.1×10 <sup>1</sup>               | 2.0×10 <sup>-4</sup>      | 3.6×10 <sup>1</sup>   | 1.8×10 <sup>-3</sup>  | 3.1×10 <sup>5</sup>                                   | 1.0×10 <sup>-2</sup>          | 9.3×10 <sup>4</sup>                                  | 1.5×10 <sup>-3</sup>         | 1.1×10 <sup>1</sup>                                     | 6.4×10 <sup>-2</sup>            | 2.3×10 <sup>3</sup>              | 1.×10 <sup>-4</sup>              |
| D163V   | 3.6                               | 0                         | 2.6×10 <sup>1</sup>   | 0                     | 1.4×10 <sup>5</sup>                                   | 1.×10 <sup>-4</sup>           | 7.2×10 <sup>3</sup>                                  | 8.0×10 <sup>-4</sup>         | 5.1                                                     | 4.6×10 <sup>-3</sup>            | ≥ 5.1×10 <sup>3</sup>            | 0                                |
| R164G   | 4.6                               | 0                         | 1.2×10 <sup>1</sup>   | 0                     | 3.8×10 <sup>5</sup>                                   | 1.×10 <sup>-4</sup>           | 2.1×10 <sup>3</sup>                                  | 4.0×10 <sup>-4</sup>         | 1.1×10 <sup>2</sup>                                     | 0                               | ≥ 2.1×10 <sup>3</sup>            | 0                                |
| R164V   | 9.9                               | 0                         | 4.4×10 <sup>1</sup>   | 0                     | 2.4×10 <sup>5</sup>                                   | 1.×10 <sup>-4</sup>           | 2.9×10                                               |                              |                                                         |                                 |                                  |                                  |



| Variant | $k_{cat}$ cMUP (s <sup>-1</sup> ) | $k_{cat}$ cMUP $p$ -value  | $K_M$ cMUP ( $\mu$ M) | $K_M$ cMUP $p$ -value      | $k_{cat}/K_M$ cMUP (M <sup>-1</sup> s <sup>-1</sup> ) | $k_{cat}/K_M$ cMUP $p$ -value | $k_{cat}/K_M$ MeP (M <sup>-1</sup> s <sup>-1</sup> ) | $k_{cat}/K_M$ MeP $p$ -value | $k_{cat}/K_M$ MecMUP (M <sup>-1</sup> s <sup>-1</sup> ) | $k_{cat}/K_M$ MecMUP $p$ -value | $K_i$ PO <sub>4</sub> ( $\mu$ M) | $K_i$ PO <sub>4</sub> $p$ -value |
|---------|-----------------------------------|----------------------------|-----------------------|----------------------------|-------------------------------------------------------|-------------------------------|------------------------------------------------------|------------------------------|---------------------------------------------------------|---------------------------------|----------------------------------|----------------------------------|
| N173G   | 4.4×10 <sup>1</sup>               | <b>1.0×10<sup>-3</sup></b> | 5.1×10 <sup>1</sup>   | <b>3.5×10<sup>-3</sup></b> | 7.3×10 <sup>5</sup>                                   | 4.0×10 <sup>-2</sup>          | 2.3×10 <sup>5</sup>                                  | <b>6.7×10<sup>-3</sup></b>   | 1.3×10 <sup>1</sup>                                     | 2.6×10 <sup>-1</sup>            | 4.6×10 <sup>2</sup>              | <b>1.×10<sup>-4</sup></b>        |
| N173V   | 2.9×10 <sup>1</sup>               | <b>0</b>                   | 8.2×10 <sup>1</sup>   | 7.0×10 <sup>-1</sup>       | 3.8×10 <sup>5</sup>                                   | <b>8.0×10<sup>-4</sup></b>    | 9.9×10 <sup>4</sup>                                  | <b>3.0×10<sup>-4</sup></b>   | ≤ 1.9                                                   | <b>1.9×10<sup>-3</sup></b>      | 5.4×10 <sup>2</sup>              | 3.1×10 <sup>-2</sup>             |
| P174G   | 1.1×10 <sup>1</sup>               | <b>0</b>                   | 5.3×10 <sup>1</sup>   | <b>0</b>                   | 2.3×10 <sup>5</sup>                                   | <b>0</b>                      | 7.4×10 <sup>4</sup>                                  | <b>0</b>                     | 3.9                                                     | <b>0</b>                        | 4.4×10 <sup>2</sup>              | <b>0</b>                         |
| P174V   | 1.1×10 <sup>1</sup>               | <b>0</b>                   | 6.7×10 <sup>1</sup>   | 4.4×10 <sup>-2</sup>       | 1.9×10 <sup>5</sup>                                   | <b>0</b>                      | 3.7×10 <sup>4</sup>                                  | <b>3.0×10<sup>-4</sup></b>   | 1.7                                                     | <b>3.0×10<sup>-4</sup></b>      | 4.5×10 <sup>2</sup>              | <b>0</b>                         |
| T175G   | 5.1×10 <sup>1</sup>               | <b>2.0×10<sup>-3</sup></b> | 7.4×10 <sup>1</sup>   | 2.6×10 <sup>-1</sup>       | 6.8×10 <sup>5</sup>                                   | 2.5×10 <sup>-2</sup>          | 2.1×10 <sup>5</sup>                                  | <b>5.0×10<sup>-3</sup></b>   | 1.4×10 <sup>1</sup>                                     | 5.6×10 <sup>-1</sup>            | 5.5×10 <sup>2</sup>              | 2.6×10 <sup>-2</sup>             |
| T175V   | 1.8×10 <sup>2</sup>               | <b>7.2×10<sup>-3</sup></b> | 1.1×10 <sup>2</sup>   | 2.8×10 <sup>-2</sup>       | 1.8×10 <sup>6</sup>                                   | 2.4×10 <sup>-1</sup>          | 6.2×10 <sup>5</sup>                                  | 8.7×10 <sup>-1</sup>         | 1.4×10 <sup>1</sup>                                     | 3.7×10 <sup>-1</sup>            | 6.7×10 <sup>2</sup>              | 4.5×10 <sup>-2</sup>             |
| G176A   | 8.4×10 <sup>1</sup>               | 1.0×10 <sup>-1</sup>       | 5.7×10 <sup>1</sup>   | 1.9×10 <sup>-2</sup>       | 1.6×10 <sup>6</sup>                                   | 7.4×10 <sup>-1</sup>          | ≤ 3.1×10 <sup>5</sup>                                | 6.9×10 <sup>-2</sup>         | 1.8×10 <sup>1</sup>                                     | 4.1×10 <sup>-1</sup>            | 5.2×10 <sup>2</sup>              | 1.5×10 <sup>-2</sup>             |
| G176V   | 3.6×10 <sup>1</sup>               | <b>9.0×10<sup>-4</sup></b> | 8.6×10 <sup>1</sup>   | 9.3×10 <sup>-1</sup>       | 4.6×10 <sup>5</sup>                                   | <b>7.7×10<sup>-3</sup></b>    | 2.4×10 <sup>5</sup>                                  | 1.0×10 <sup>-2</sup>         | ≤ 1.9                                                   | <b>1.4×10<sup>-3</sup></b>      | 5.0×10 <sup>2</sup>              | <b>6.7×10<sup>-3</sup></b>       |
| A177G   | 2.8×10 <sup>1</sup>               | <b>8.0×10<sup>-4</sup></b> | 5.6×10 <sup>1</sup>   | 1.7×10 <sup>-2</sup>       | 4.0×10 <sup>5</sup>                                   | <b>6.5×10<sup>-3</sup></b>    | 1.0×10 <sup>5</sup>                                  | <b>1.6×10<sup>-3</sup></b>   | 5.6                                                     | <b>3.0×10<sup>-4</sup></b>      | 6.0×10 <sup>2</sup>              | 5.7×10 <sup>-1</sup>             |
| A177V   | 1.1×10 <sup>2</sup>               | 5.9×10 <sup>-1</sup>       | 9.1×10 <sup>1</sup>   | 4.4×10 <sup>-1</sup>       | 1.3×10 <sup>6</sup>                                   | 6.0×10 <sup>-1</sup>          | 3.5×10 <sup>5</sup>                                  | 2.0×10 <sup>-2</sup>         | 7.6                                                     | 1.2×10 <sup>-2</sup>            | 6.5×10 <sup>2</sup>              | 2.0×10 <sup>-1</sup>             |
| F178G   | 1.7                               | <b>0</b>                   | 6.7×10 <sup>1</sup>   | 8.1×10 <sup>-2</sup>       | 1.8×10 <sup>4</sup>                                   | <b>1.×10<sup>-4</sup></b>     | ≤ 5.7×10 <sup>3</sup>                                | <b>0</b>                     | ≤ 1.1                                                   | <b>3.0×10<sup>-4</sup></b>      | 5.7×10 <sup>2</sup>              | 1.2×10 <sup>-1</sup>             |
| F178V   | 1.0×10 <sup>2</sup>               | 2.6×10 <sup>-1</sup>       | 9.1×10 <sup>1</sup>   | 5.9×10 <sup>-1</sup>       | 1.2×10 <sup>6</sup>                                   | 5.7×10 <sup>-1</sup>          | 3.6×10 <sup>5</sup>                                  | 3.1×10 <sup>-2</sup>         | 1.2×10 <sup>1</sup>                                     | 3.4×10 <sup>-1</sup>            | 5.7×10 <sup>2</sup>              | 1.4×10 <sup>-1</sup>             |
| W179G   | -                                 | -                          | -                     | -                          | ≤ 4.2×10 <sup>2</sup>                                 | <b>0</b>                      | ≤ 8.4×10 <sup>2</sup>                                | <b>0</b>                     | ≤ 1.3                                                   | <b>0</b>                        | -                                | -                                |
| W179V   | 2.7                               | 3.8×10 <sup>-2</sup>       | 5.9×10 <sup>1</sup>   | 2.9×10 <sup>-1</sup>       | 4.6×10 <sup>4</sup>                                   | 6.0×10 <sup>-2</sup>          | ≤ 1.4×10 <sup>4</sup>                                | <b>0</b>                     | ≤ 1.8                                                   | <b>1.8×10<sup>-3</sup></b>      | 5.7×10 <sup>2</sup>              | 5.1×10 <sup>-1</sup>             |
| F180G   | 3.9×10 <sup>1</sup>               | <b>5.0×10<sup>-4</sup></b> | 4.5×10 <sup>1</sup>   | <b>9.0×10<sup>-4</sup></b> | 1.1×10 <sup>6</sup>                                   | 2.9×10 <sup>-1</sup>          | 3.7×10 <sup>4</sup>                                  | <b>0</b>                     | 6.5                                                     | <b>1.5×10<sup>-3</sup></b>      | 5.4×10 <sup>2</sup>              | 6.7×10 <sup>-2</sup>             |
| F180V   | 1.3×10 <sup>2</sup>               | 6.4×10 <sup>-1</sup>       | 4.8×10 <sup>1</sup>   | 4.3×10 <sup>-2</sup>       | 1.9×10 <sup>6</sup>                                   | 3.7×10 <sup>-1</sup>          | 1.0×10 <sup>5</sup>                                  | 1.7×10 <sup>-2</sup>         | 1.4×10 <sup>1</sup>                                     | 6.8×10 <sup>-1</sup>            | 4.2×10 <sup>2</sup>              | <b>4.0×10<sup>-4</sup></b>       |
| D181G   | 3.0×10 <sup>1</sup>               | <b>0</b>                   | 7.9×10 <sup>1</sup>   | 5.0×10 <sup>-1</sup>       | 3.4×10 <sup>5</sup>                                   | <b>4.0×10<sup>-4</sup></b>    | 4.0×10 <sup>4</sup>                                  | <b>0</b>                     | 2.0                                                     | <b>1.0×10<sup>-3</sup></b>      | 7.5×10 <sup>2</sup>              | <b>5.0×10<sup>-4</sup></b>       |
| D181V   | 5.4×10 <sup>1</sup>               | 1.1×10 <sup>-2</sup>       | 6.2×10 <sup>1</sup>   | 4.6×10 <sup>-2</sup>       | 8.6×10 <sup>5</sup>                                   | 1.3×10 <sup>-1</sup>          | 2.5×10 <sup>4</sup>                                  | <b>0</b>                     | 1.0×10 <sup>1</sup>                                     | 1.8×10 <sup>-1</sup>            | -                                | -                                |
| D182G   | 6.2×10 <sup>1</sup>               | 5.9×10 <sup>-2</sup>       | 6.5×10 <sup>1</sup>   | 1.0×10 <sup>-1</sup>       | 1.5×10 <sup>6</sup>                                   | 8.4×10 <sup>-1</sup>          | 5.9×10 <sup>4</sup>                                  | <b>0</b>                     | 8.2                                                     | <b>6.7×10<sup>-3</sup></b>      | 1.1×10 <sup>3</sup>              | <b>0</b>                         |
| D182V   | 2.6×10 <sup>2</sup>               | <b>0</b>                   | 5.3×10 <sup>1</sup>   | <b>4.1×10<sup>-3</sup></b> | 4.1×10 <sup>6</sup>                                   | <b>0</b>                      | 1.4×10 <sup>5</sup>                                  | <b>1.5×10<sup>-3</sup></b>   | 2.1×10 <sup>1</sup>                                     | 2.7×10 <sup>-1</sup>            | 5.6×10 <sup>2</sup>              | 1.3×10 <sup>-1</sup>             |
| T183G   | 8.6×10 <sup>1</sup>               | 1.1×10 <sup>-1</sup>       | 7.0×10 <sup>1</sup>   | 2.3×10 <sup>-1</sup>       | 1.3×10 <sup>6</sup>                                   | 7.4×10 <sup>-1</sup>          | 4.8×10 <sup>5</sup>                                  | 2.1×10 <sup>-1</sup>         | 1.6×10 <sup>1</sup>                                     | 9.7×10 <sup>-1</sup>            | 4.3×10 <sup>2</sup>              | <b>1.3×10<sup>-3</sup></b>       |
| T183V   | 2.0×10 <sup>2</sup>               | <b>7.0×10<sup>-4</sup></b> | 7.7×10 <sup>1</sup>   | 3.6×10 <sup>-1</sup>       | 2.1×10 <sup>6</sup>                                   | 4.4×10 <sup>-2</sup>          | 5.4×10 <sup>5</sup>                                  | 5.5×10 <sup>-1</sup>         | 1.9×10 <sup>1</sup>                                     | 4.3×10 <sup>-1</sup>            | 5.6×10 <sup>2</sup>              | 1.6×10 <sup>-1</sup>             |
| T184G   | 7.1×10 <sup>1</sup>               | 4.0×10 <sup>-2</sup>       | 6.3×10 <sup>1</sup>   | 6.0×10 <sup>-2</sup>       | 1.4×10 <sup>6</sup>                                   | 9.0×10 <sup>-1</sup>          | 3.0×10 <sup>5</sup>                                  | 2.1×10 <sup>-2</sup>         | 1.1×10 <sup>1</sup>                                     | 6.3×10 <sup>-2</sup>            | 4.5×10 <sup>2</sup>              | <b>0</b>                         |
| T184V   | 7.8×10 <sup>1</sup>               | 4.1×10 <sup>-2</sup>       | 7.2×10 <sup>1</sup>   | 1.8×10 <sup>-1</sup>       | 1.0×10 <sup>6</sup>                                   | 1.9×10 <sup>-1</sup>          | 3.7×10 <sup>5</sup>                                  | 3.7×10 <sup>-2</sup>         | 1.1×10 <sup>1</sup>                                     | 2.2×10 <sup>-1</sup>            | 5.8×10 <sup>2</sup>              | 1.7×10 <sup>-1</sup>             |
| G185A   | 1.8×10 <sup>2</sup>               | 4.9×10 <sup>-2</sup>       | 8.5×10 <sup>1</sup>   | 9.8×10 <sup>-1</sup>       | 2.2×10 <sup>6</sup>                                   | 6.1×10 <sup>-2</sup>          | 6.4×10 <sup>5</sup>                                  | 8.3×10 <sup>-1</sup>         | 2.4×10 <sup>1</sup>                                     | 1.0×10 <sup>-2</sup>            | 5.2×10 <sup>2</sup>              | 1.8×10 <sup>-2</sup>             |
| G185V   | 5.3×10 <sup>1</sup>               | <b>7.3×10<sup>-3</sup></b> | 6.8×10 <sup>1</sup>   | 1.5×10 <sup>-1</sup>       | 7.5×10 <sup>5</sup>                                   | 7.2×10 <sup>-2</sup>          | 2.7×10 <sup>4</sup>                                  | <b>0</b>                     | 1.0×10 <sup>1</sup>                                     | 1.4×10 <sup>-1</sup>            | 3.5×10 <sup>2</sup>              | <b>5.0×10<sup>-4</sup></b>       |
| K186G   | 1.1×10 <sup>2</sup>               | 4.2×10 <sup>-1</sup>       | 6.8×10 <sup>1</sup>   | 9.7×10 <sup>-2</sup>       | 1.7×10 <sup>6</sup>                                   | 4.2×10 <sup>-1</sup>          | 3.0×10 <sup>5</sup>                                  | 2.2×10 <sup>-2</sup>         | 1.7×10 <sup>1</sup>                                     | 8.4×10 <sup>-1</sup>            | 5.9×10 <sup>2</sup>              | 3.0×10 <sup>-1</sup>             |
| K186V   | 1.8×10 <sup>2</sup>               | 1.3×10 <sup>-2</sup>       | 8.4×10 <sup>1</sup>   | 9.0×10 <sup>-1</sup>       | 1.9×10 <sup>6</sup>                                   | 1.2×10 <sup>-1</sup>          | 1.6×10 <sup>5</sup>                                  | <b>3.0×10<sup>-4</sup></b>   | 1.2×10 <sup>1</sup>                                     | 3.3×10 <sup>-1</sup>            | 6.4×10 <sup>2</sup>              | 4.3×10 <sup>-1</sup>             |
| F187G   | 1.0×10 <sup>1</sup>               | <b>1.×10<sup>-4</sup></b>  | 5.2×10 <sup>1</sup>   | <b>1.5×10<sup>-3</sup></b> | 1.7×10 <sup>5</sup>                                   | <b>3.0×10<sup>-4</sup></b>    | 1.6×10 <sup>4</sup>                                  | <b>4.1×10<sup>-3</sup></b>   | ≤ 1.1                                                   | <b>0</b>                        | 6.2×10 <sup>2</sup>              | 8.6×10 <sup>-1</sup>             |
| F187V   | 3.5×10 <sup>1</sup>               | <b>0</b>                   | 7.1×10 <sup>1</sup>   | 1.7×10 <sup>-1</sup>       | 5.0×10 <sup>5</sup>                                   | <b>6.1×10<sup>-3</sup></b>    | 1.0×10 <sup>5</sup>                                  | <b>1.4×10<sup>-3</sup></b>   | ≤ 2.4                                                   | <b>2.1×10<sup>-3</sup></b>      | 6.0×10 <sup>2</sup>              | 4.5×10 <sup>-1</sup>             |
| I188V   | 2.1×10 <sup>2</sup>               | <b>0</b>                   | 9.3×10 <sup>1</sup>   | 4.4×10 <sup>-1</sup>       | 1.9×10 <sup>6</sup>                                   | 1.7×10 <sup>-1</sup>          | 3.8×10 <sup>5</sup>                                  | 5.2×10 <sup>-2</sup>         | 1.9×10 <sup>1</sup>                                     | 5.1×10 <sup>-1</sup>            | 6.2×10 <sup>2</sup>              | 8.1×10 <sup>-1</sup>             |
| T189G   | 1.9×10 <sup>1</sup>               | <b>1.×10<sup>-4</sup></b>  | 6.6×10 <sup>1</sup>   | 6.4×10 <sup>-2</sup>       | 2.8×10 <sup>5</sup>                                   | <b>1.0×10<sup>-3</sup></b>    | 7.0×10 <sup>4</sup>                                  | <b>0</b>                     | 2.1                                                     | <b>5.0×10<sup>-4</sup></b>      | 5.4×10 <sup>2</sup>              | 4.2×10 <sup>-2</sup>             |
| S190G   | 1.1×10 <sup>1</sup>               | <b>0</b>                   | 3.3×10 <sup>1</sup>   | <b>1.×10<sup>-4</sup></b>  | 4.0×10 <sup>5</sup>                                   | <b>2.7×10<sup>-3</sup></b>    | 8.0×10 <sup>4</sup>                                  | <b>6.0×10<sup>-4</sup></b>   | 3.4                                                     | <b>0</b>                        | 1.0×10 <sup>3</sup>              | <b>0</b>                         |
| S190V   | -                                 | -                          | -                     | -                          | ≤ 4.7×10 <sup>2</sup>                                 | <b>0</b>                      | ≤ 7.7×10 <sup>2</sup>                                | <b>2.7×10<sup>-3</sup></b>   | ≤ 1.3                                                   | <b>0</b>                        | 1.9×10 <sup>2</sup>              | <b>9.0×10<sup>-4</sup></b>       |
| T191G   | 1.6×10 <sup>2</sup>               | 1.8×10 <sup>-1</sup>       | 7.3×10 <sup>1</sup>   | 3.5×10 <sup>-1</sup>       | 2.1×10 <sup>6</sup>                                   | 9.7×10 <sup>-2</sup>          | 5.4×10 <sup>5</sup>                                  | 6.9×10 <sup>-1</sup>         | 2.3×10 <sup>1</sup>                                     | 6.5×10 <sup>-2</sup>            | 5.6×10 <sup>2</sup>              | 8.9×10 <sup>-2</sup>             |
| T191V   | 1.9×10 <sup>1</sup>               | <b>7.0×10<sup>-4</sup></b> | 7.0×10 <sup>1</sup>   | 1.9×10 <sup>-1</sup>       | 3.0×10 <sup>5</sup>                                   | <b>3.1×10<sup>-3</sup></b>    | 7.5×10 <sup>4</sup>                                  | <b>3.9×10<sup>-3</sup></b>   | ≤ 1.9                                                   | <b>2.0×10<sup>-3</sup></b>      | 6.1×10 <sup>2</sup>              | 8.2×10 <sup>-1</sup>             |
| Y192V   | 8.7                               | <b>5.1×10<sup>-3</sup></b> | 7.8×10 <sup>1</sup>   | 6.5×10 <sup>-1</sup>       | 1.1×10 <sup>5</sup>                                   | 1.2×10 <sup>-2</sup>          | ≤ 3.6×10 <sup>4</sup>                                | <b>7.0×10<sup>-4</sup></b>   | ≤ 1.9                                                   | <b>1.0×10<sup>-3</sup></b>      | -                                | -                                |
| Y193G   | -                                 | -                          | -                     | -                          | ≤ 6.0×10 <sup>2</sup>                                 | <b>0</b>                      | ≤ 9.5×10 <sup>2</sup>                                | <b>0</b>                     | ≤ 1.3                                                   | <b>0</b>                        | -                                | -                                |
| Y193V   | 2.6×10 <sup>1</sup>               | <b>2.0×10<sup>-4</sup></b> | 7.6×10 <sup>1</sup>   | 3.9×10 <sup>-1</sup>       | 3.9×10 <sup>5</sup>                                   | <b>4.8×10<sup>-3</sup></b>    | 3.9×10 <sup>4</sup>                                  | <b>0</b>                     | ≤ 1.9                                                   | <b>3.0×10<sup>-4</sup></b>      | 5.2×10 <sup>2</sup>              | 4.2×10 <sup>-2</sup>             |
| T194G   | 1.3×10 <sup>2</sup>               | 7.2×10 <sup>-1</sup>       | 7.9×10 <sup>1</sup>   | 5.4×10 <sup>-1</sup>       | 2.1×10 <sup>6</sup>                                   | 4.6×10 <sup>-2</sup>          | 7.0×10 <sup>5</sup>                                  | 4.6×10 <sup>-1</sup>         | 1.9×10 <sup>1</sup>                                     | 5.5×10 <sup>-1</sup>            | 6.0×10 <sup>2</sup>              | 6.4×10 <sup>-1</sup>             |
| T194V   | 1.3×10 <sup>2</sup>               | 5.5×10 <sup>-1</sup>       | 8.7×10 <sup>1</sup>   | 7.8×10 <sup>-1</sup>       | 1.1×10 <sup>6</sup>                                   | 3.7×10 <sup>-1</sup>          | 7.3×10 <sup>5</sup>                                  | 2.4×10 <sup>-1</sup>         | 1.3×10 <sup>1</sup>                                     | 3.9×10 <sup>-1</sup>            | 6.4×10 <sup>2</sup>              | 3.0×10 <sup>-1</sup>             |
| K195G   | 1.7×10 <sup>2</sup>               | 3.9×10 <sup>-2</sup>       | 7.5×10 <sup>1</sup>   | 3.9×10 <sup>-1</sup>       | 2.2×10 <sup>6</sup>                                   | 4.6×10 <sup>-2</sup>          | 5.7×10 <sup>5</sup>                                  | 7.7×10 <sup>-1</sup>         | 1.9×10 <sup>1</sup>                                     | 5.5×10 <sup>-1</sup>            | 6.0×10 <sup>2</sup>              | 7.2×10 <sup>-1</sup>             |
| K195V   | 1.8×10 <sup>2</sup>               | <b>4.5×10<sup>-3</sup></b> | 8.7×10 <sup>1</sup>   | 8.4×10 <sup>-1</sup>       | 2.0×10 <sup>6</sup>                                   | 5.7×10 <sup>-2</sup>          | 3.8×10 <sup>5</sup>                                  | 3.3×10 <sup>-2</sup>         | 1.6×10 <sup>1</sup>                                     | 9.6×10 <sup>-1</sup>            | 6.6×10 <sup>2</sup>              | 1.4×10 <sup>-1</sup>             |
| E196G   | 1.4×10 <sup>2</sup>               | 4.3×10 <sup>-1</sup>       | 6.7×10 <sup>1</sup>   | 1.3×10 <sup>-1</sup>       | 2.0×10 <sup>6</sup>                                   | 9.5×10 <sup>-2</sup>          | 4.6×10 <sup>5</sup>                                  | 2.0×10 <sup>-1</sup>         | 1.4×10 <sup>1</sup>                                     | 4.7×10 <sup>-1</sup>            | 5.4×10 <sup>2</sup>              | 4.3×10 <sup>-2</sup>             |
| E196V   | 2.1×10 <sup>2</sup>               | <b>8.0×10<sup>-4</sup></b> | 8.7×10 <sup>1</sup>   | 8.7×10 <sup>-1</sup>       | 2.1×10 <sup>6</sup>                                   | 5.8×10 <sup>-2</sup>          | 4.1×10 <sup>5</sup>                                  | 4.8×10 <sup>-2</sup>         | 1.4×10 <sup>1</sup>                                     | 6.4×10 <sup>-1</sup>            | 6.6×10 <sup>2</sup>              | 1.0×10 <sup>-1</sup>             |
| L197G   | 3.0×10 <sup>1</sup>               | <b>4.0×10<sup>-4</sup></b> | 7.5×10 <sup>1</sup>   | 3.7×10 <sup>-1</sup>       | 3.1×10 <sup>5</sup>                                   | <b>2.2×10<sup>-3</sup></b>    | 1.4×10 <sup>5</sup>                                  | <b>2.4×10<sup>-3</sup></b>   | 6.0                                                     | <b>8.1×10<sup>-3</sup></b>      | 4.9×10 <sup>2</sup>              | <b>1.3×10<sup>-3</sup></b>       |
| L197V   | 1.2×10 <sup>2</sup>               | 7.7×10 <sup>-1</sup>       | 1.0×10 <sup>2</sup>   | 1.0×10 <sup>-1</sup>       | 1.3×10 <sup>6</sup>                                   | 6.9×10 <sup>-1</sup>          | 4.8×10 <sup>5</sup>                                  | 1.3×10 <sup>-1</sup>         | 1.1×10 <sup>1</sup>                                     | 1.4×10 <sup>-1</sup>            | 6.0×10 <sup>2</sup>              | 7.3×10 <sup>-1</sup>             |
| P198G   | 6.1×10 <sup>1</sup>               | 1.4×10 <sup>-2</sup>       | 7.0×10 <sup>1</sup>   | 2.1×10 <sup>-1</sup>       | 7.5×10 <sup>5</sup>                                   | 6.8×10 <sup>-2</sup>          | 1.1×10 <sup>5</sup>                                  | <b>1.5×10<sup>-3</sup></b>   | 8.9                                                     | 2.3×10 <sup>-2</sup>            | 5.4×10 <sup>2</sup>              | 3.4×10 <sup>-2</sup>             |
| P198V   | 1.7×10 <sup>2</sup>               | 4.5×10 <sup>-2</sup>       | 8.5×10 <sup>1</sup>   | 9.4×10 <sup>-1</sup>       | 1.9×10 <sup>6</sup>                                   | 2.3×10 <sup>-1</sup>          | 1.2×10 <sup>5</sup>                                  | <b>1.7×10<sup>-3</sup></b>   | 9.5                                                     | 3.7×10 <sup>-2</sup>            | 6.0×10 <sup>2</sup>              | 6.9×10 <sup>-1</sup>             |
| K199G   | 1.5×10 <sup>2</sup>               | 1.3×10 <sup>-1</sup>       | 8.1×10 <sup>1</sup>   | 7.0×10 <sup>-1</sup>       | 1.9×10 <sup>6</sup>                                   | 1.2×10 <sup>-1</sup>          | 6.6×10 <sup>5</sup>                                  | 6.6×10 <sup>-1</sup>         | 1.7×10 <sup>1</sup>                                     | 9.3×10 <sup>-1</sup>            | 5.8×10 <sup>2</sup>              | 3.2×10 <sup>-1</sup>             |
| K199V   | 1.5×10 <sup>2</sup>               | 1.9×10 <sup>-1</sup>       | 8.4×10 <sup>1</sup>   | 8.8×10 <sup>-1</sup>       | 1.7×10 <sup>6</sup>                                   | 5.4×10 <sup>-1</sup>          | 5.4×10 <sup>5</sup>                                  | 6.6×10 <sup>-1</sup>         | 1.8×10 <sup>1</sup>                                     | 6.7×10 <sup>-1</sup>            | 6.5×10 <sup>2</sup>              | 2.2×10 <sup>-1</sup>             |
| W200G   | 3.8                               | <b>0</b>                   | 6.3×10 <sup>1</sup>   | 3.5×10 <sup>-2</sup>       | 6.1×10 <sup>4</sup>                                   | <b>0</b>                      | ≤ 5.3×10 <sup>3</sup>                                | <b>0</b>                     | ≤ 1.2                                                   | <b>1.×10<sup>-4</sup></b>       | 5.5×10 <sup>2</sup>              | 1.4×10 <sup>-2</sup>             |
| W200V   | 1.7×10 <sup>1</sup>               | <b>2.4×10<sup>-3</sup></b> | 8.1×10 <sup>1</sup>   | 7.2×10 <sup>-1</sup>       | 2.1×10 <sup>5</sup>                                   | <b>6.7×10<sup>-3</sup></b>    | 2.3×10 <sup>4</sup>                                  | <b>0</b>                     | ≤ 1.2                                                   | <b>0</b>                        | 4.4×10 <sup>2</sup>              | <b>9.0×10<sup>-4</sup></b>       |
| V201A   | 2.1×10 <sup>2</sup>               | <b>5.5×10<sup>-3</sup></b> | 1.0×10 <sup>2</sup>   | 2.8×10 <sup>-1</sup>       | 1.9×10 <sup>6</sup>                                   | 3.1×10 <sup>-1</sup>          | 3.4×10 <sup>5</sup>                                  | 3.6×10 <sup>-2</sup>         | 1.5×10 <sup>1</sup>                                     | 7.5×10 <sup>-1</sup>            | 6.7×10 <sup>2</sup>              | 1.7×10 <sup>-1</sup>             |
| V201G   | 2.9×10 <sup>1</sup>               | <b>0</b>                   | 7.3×10 <sup>1</sup>   | 1.4×10 <sup>-1</sup>       | 3.7×10 <sup>5</sup>                                   | <b>5.0×10<sup>-4</sup></b>    | 7.1×10 <sup>4</sup>                                  | <b>1.×10<sup>-4</sup></b>    | 3.1                                                     | <b>1.4×10<sup>-3</sup></b>      | 5.2×10 <sup>2</sup>              | <b>4.1×10<sup>-3</sup></b>       |
| N202G   | 1.3×10 <sup>2</sup>               | 7.9×10 <sup>-1</sup>       | 7.7×10 <sup>1</sup>   | 3.9×10 <sup>-1</sup>       | 1.8×10 <sup>6</sup>                                   | 2.8×10 <sup>-1</sup>          | 3.1×10 <sup>5</sup>                                  | 2.7×10 <sup>-2</sup>         | 1.9×10 <sup>1</sup>                                     | 4.2×10 <sup>-1</sup>            | 5.8×10 <sup>2</sup>              | 1.5×10 <sup>-1</sup>             |
| N202V   | 1.4×10 <sup>2</sup>               | 2.0×10 <sup>-1</sup>       | 9.6×10 <sup>1</sup>   | 2.5×10 <sup>-1</sup>       | 1.7×10 <sup>6</sup>                                   | 3.6×10 <sup>-1</sup>          | 5.1×10 <sup>5</sup>                                  | 3.9×10 <sup>-1</sup>         | 1.1×10 <sup>1</sup>                                     | 2.9×10 <sup>-1</sup>            | 6.6×10 <sup>2</sup>              | 1.3×10 <sup>-1</sup>             |
| D203G   | 9.6×10 <sup>1</sup>               | 3.                         |                       |                            |                                                       |                               |                                                      |                              |                                                         |                                 |                                  |                                  |



| Variant | $k_{cat}$ cMUP (s <sup>-1</sup> ) | $k_{cat}$ cMUP $p$ -value  | $K_M$ cMUP ( $\mu$ M) | $K_M$ cMUP $p$ -value      | $k_{cat}/K_M$ cMUP (M <sup>-1</sup> s <sup>-1</sup> ) | $k_{cat}/K_M$ cMUP $p$ -value | $k_{cat}/K_M$ MeP (M <sup>-1</sup> s <sup>-1</sup> ) | $k_{cat}/K_M$ MeP $p$ -value | $k_{cat}/K_M$ MecMUP (M <sup>-1</sup> s <sup>-1</sup> ) | $k_{cat}/K_M$ MecMUP $p$ -value | $K_i$ PO <sub>4</sub> ( $\mu$ M) | $K_i$ PO <sub>4</sub> $p$ -value |                      |
|---------|-----------------------------------|----------------------------|-----------------------|----------------------------|-------------------------------------------------------|-------------------------------|------------------------------------------------------|------------------------------|---------------------------------------------------------|---------------------------------|----------------------------------|----------------------------------|----------------------|
| Q212V   | 1.7×10 <sup>2</sup>               | 2.5×10 <sup>-2</sup>       | 8.6×10 <sup>1</sup>   | 9.8×10 <sup>-1</sup>       | 1.9×10 <sup>6</sup>                                   | 1.5×10 <sup>-1</sup>          | 8.6×10 <sup>1</sup>                                  | 4.2×10 <sup>5</sup>          | 7.1×10 <sup>-2</sup>                                    | 1.2×10 <sup>1</sup>             | 3.6×10 <sup>-1</sup>             | 6.4×10 <sup>2</sup>              | 4.4×10 <sup>-1</sup> |
| L213G   | 1.6×10 <sup>2</sup>               | 1.4×10 <sup>-1</sup>       | 6.7×10 <sup>1</sup>   | 1.7×10 <sup>-1</sup>       | 2.7×10 <sup>6</sup>                                   | <b>5.1×10<sup>-3</sup></b>    | 3.5×10 <sup>5</sup>                                  | 4.0×10 <sup>-2</sup>         | 1.6×10 <sup>1</sup>                                     | 9.2×10 <sup>-1</sup>            | 5.6×10 <sup>2</sup>              | 8.7×10 <sup>-2</sup>             |                      |
| L213V   | 1.3×10 <sup>2</sup>               | 5.2×10 <sup>-1</sup>       | 7.2×10 <sup>1</sup>   | 1.7×10 <sup>-1</sup>       | 1.5×10 <sup>6</sup>                                   | 6.5×10 <sup>-1</sup>          | 3.7×10 <sup>5</sup>                                  | 6.3×10 <sup>-2</sup>         | 1.4×10 <sup>1</sup>                                     | 5.6×10 <sup>-1</sup>            | 5.6×10 <sup>2</sup>              | 8.0×10 <sup>-2</sup>             |                      |
| V214A   | 1.4×10 <sup>2</sup>               | 1.8×10 <sup>-1</sup>       | 8.0×10 <sup>1</sup>   | 5.1×10 <sup>-1</sup>       | 1.6×10 <sup>6</sup>                                   | 6.1×10 <sup>-1</sup>          | 5.0×10 <sup>5</sup>                                  | 1.7×10 <sup>-1</sup>         | 1.4×10 <sup>1</sup>                                     | 4.3×10 <sup>-1</sup>            | 5.7×10 <sup>2</sup>              | 7.1×10 <sup>-2</sup>             |                      |
| V214G   | 7.2×10 <sup>1</sup>               | 4.4×10 <sup>-2</sup>       | 4.9×10 <sup>1</sup>   | <b>4.9×10<sup>-3</sup></b> | 1.6×10 <sup>6</sup>                                   | 6.3×10 <sup>-1</sup>          | 2.2×10 <sup>5</sup>                                  | <b>5.9×10<sup>-3</sup></b>   | 1.6×10 <sup>1</sup>                                     | 9.7×10 <sup>-1</sup>            | 4.2×10 <sup>2</sup>              | <b>0</b>                         |                      |
| A215G   | 1.4×10 <sup>2</sup>               | 5.2×10 <sup>-1</sup>       | 6.4×10 <sup>1</sup>   | 1.2×10 <sup>-1</sup>       | 2.2×10 <sup>6</sup>                                   | 7.6×10 <sup>-2</sup>          | 5.2×10 <sup>5</sup>                                  | 5.7×10 <sup>-1</sup>         | 1.8×10 <sup>1</sup>                                     | 6.3×10 <sup>-1</sup>            | 5.5×10 <sup>2</sup>              | 1.1×10 <sup>-1</sup>             |                      |
| A215V   | 1.8×10 <sup>2</sup>               | 2.4×10 <sup>-2</sup>       | 8.8×10 <sup>1</sup>   | 7.8×10 <sup>-1</sup>       | 2.4×10 <sup>6</sup>                                   | 1.2×10 <sup>-2</sup>          | 5.1×10 <sup>5</sup>                                  | 4.1×10 <sup>-1</sup>         | 1.5×10 <sup>1</sup>                                     | 6.4×10 <sup>-1</sup>            | 6.1×10 <sup>2</sup>              | 7.3×10 <sup>-1</sup>             |                      |
| N216G   | 1.9×10 <sup>2</sup>               | 1.1×10 <sup>-2</sup>       | 9.4×10 <sup>1</sup>   | 4.6×10 <sup>-1</sup>       | 2.2×10 <sup>6</sup>                                   | 4.8×10 <sup>-2</sup>          | 6.0×10 <sup>5</sup>                                  | 9.2×10 <sup>-1</sup>         | 1.9×10 <sup>1</sup>                                     | 4.3×10 <sup>-1</sup>            | 5.4×10 <sup>2</sup>              | 2.3×10 <sup>-2</sup>             |                      |
| N216V   | 1.1×10 <sup>2</sup>               | 8.0×10 <sup>-1</sup>       | 9.1×10 <sup>1</sup>   | 7.6×10 <sup>-1</sup>       | 9.9×10 <sup>5</sup>                                   | 4.5×10 <sup>-1</sup>          | 1.2×10 <sup>5</sup>                                  | <b>0</b>                     | ≤ 3.9                                                   | 1.1×10 <sup>-2</sup>            | -                                | -                                |                      |
| G217A   | 1.7×10 <sup>1</sup>               | <b>1.×10<sup>-4</sup></b>  | 7.1×10 <sup>1</sup>   | 1.7×10 <sup>-1</sup>       | 2.2×10 <sup>5</sup>                                   | <b>6.0×10<sup>-4</sup></b>    | 2.1×10 <sup>4</sup>                                  | <b>4.0×10<sup>-4</sup></b>   | 1.4                                                     | <b>6.0×10<sup>-3</sup></b>      | 5.8×10 <sup>2</sup>              | 4.9×10 <sup>-1</sup>             |                      |
| G217V   | 1.7×10 <sup>2</sup>               | 2.0×10 <sup>-2</sup>       | 7.9×10 <sup>1</sup>   | 5.4×10 <sup>-1</sup>       | 1.9×10 <sup>6</sup>                                   | 1.9×10 <sup>-1</sup>          | 3.0×10 <sup>5</sup>                                  | 2.5×10 <sup>-2</sup>         | 2.0×10 <sup>1</sup>                                     | 4.0×10 <sup>-1</sup>            | 6.3×10 <sup>2</sup>              | 6.8×10 <sup>-1</sup>             |                      |
| W218G   | 7.5                               | <b>0</b>                   | 3.2×10 <sup>1</sup>   | <b>0</b>                   | 2.2×10 <sup>5</sup>                                   | <b>1.×10<sup>-4</sup></b>     | 2.1×10 <sup>4</sup>                                  | <b>0</b>                     | 2.1                                                     | <b>1.1×10<sup>-3</sup></b>      | 3.0×10 <sup>2</sup>              | <b>0</b>                         |                      |
| W218V   | 1.7×10 <sup>1</sup>               | <b>0</b>                   | 3.5×10 <sup>1</sup>   | <b>0</b>                   | 4.3×10 <sup>5</sup>                                   | <b>8.0×10<sup>-4</sup></b>    | 2.4×10 <sup>4</sup>                                  | <b>1.×10<sup>-4</sup></b>    | 2.6                                                     | <b>2.0×10<sup>-4</sup></b>      | 2.6×10 <sup>2</sup>              | <b>0</b>                         |                      |
| N219G   | 9.2×10 <sup>1</sup>               | 1.4×10 <sup>-1</sup>       | 6.9×10 <sup>1</sup>   | 1.3×10 <sup>-1</sup>       | 1.4×10 <sup>6</sup>                                   | 8.8×10 <sup>-1</sup>          | 3.4×10 <sup>5</sup>                                  | 3.3×10 <sup>-2</sup>         | 1.7×10 <sup>1</sup>                                     | 7.1×10 <sup>-1</sup>            | 5.9×10 <sup>2</sup>              | 3.0×10 <sup>-1</sup>             |                      |
| N219V   | 1.5×10 <sup>2</sup>               | 1.1×10 <sup>-1</sup>       | 9.3×10 <sup>1</sup>   | 4.7×10 <sup>-1</sup>       | 1.4×10 <sup>6</sup>                                   | 8.1×10 <sup>-1</sup>          | 4.5×10 <sup>5</sup>                                  | 1.6×10 <sup>-1</sup>         | 1.7×10 <sup>1</sup>                                     | 8.7×10 <sup>-1</sup>            | 6.1×10 <sup>2</sup>              | 8.5×10 <sup>-1</sup>             |                      |
| T220G   | 5.4×10 <sup>1</sup>               | <b>3.2×10<sup>-3</sup></b> | 7.0×10 <sup>1</sup>   | 1.6×10 <sup>-1</sup>       | 6.2×10 <sup>5</sup>                                   | 1.5×10 <sup>-2</sup>          | 2.4×10 <sup>5</sup>                                  | <b>7.2×10<sup>-3</sup></b>   | 5.4                                                     | <b>1.0×10<sup>-3</sup></b>      | 4.9×10 <sup>2</sup>              | <b>3.0×10<sup>-4</sup></b>       |                      |
| T220V   | 1.3×10 <sup>2</sup>               | 7.8×10 <sup>-1</sup>       | 9.6×10 <sup>1</sup>   | 2.7×10 <sup>-1</sup>       | 1.4×10 <sup>6</sup>                                   | 8.6×10 <sup>-1</sup>          | 3.6×10 <sup>5</sup>                                  | 2.4×10 <sup>-2</sup>         | 1.3×10 <sup>1</sup>                                     | 4.2×10 <sup>-1</sup>            | 6.4×10 <sup>2</sup>              | 4.3×10 <sup>-1</sup>             |                      |
| L221G   | 8.3×10 <sup>1</sup>               | 1.9×10 <sup>-1</sup>       | 6.3×10 <sup>1</sup>   | 1.2×10 <sup>-1</sup>       | 1.4×10 <sup>6</sup>                                   | 9.3×10 <sup>-1</sup>          | 1.9×10 <sup>5</sup>                                  | 3.2×10 <sup>-2</sup>         | 1.1×10 <sup>1</sup>                                     | 1.3×10 <sup>-1</sup>            | 5.4×10 <sup>2</sup>              | 5.2×10 <sup>-2</sup>             |                      |
| L221V   | 1.5×10 <sup>2</sup>               | 3.5×10 <sup>-1</sup>       | 8.1×10 <sup>1</sup>   | 7.0×10 <sup>-1</sup>       | 1.6×10 <sup>6</sup>                                   | 6.8×10 <sup>-1</sup>          | 4.5×10 <sup>5</sup>                                  | 1.5×10 <sup>-1</sup>         | 1.9×10 <sup>1</sup>                                     | 5.5×10 <sup>-1</sup>            | 6.3×10 <sup>2</sup>              | 7.7×10 <sup>-1</sup>             |                      |
| L222G   | 7.7×10 <sup>1</sup>               | 6.7×10 <sup>-2</sup>       | 5.7×10 <sup>1</sup>   | 2.0×10 <sup>-2</sup>       | 1.2×10 <sup>6</sup>                                   | 4.7×10 <sup>-1</sup>          | 2.7×10 <sup>5</sup>                                  | 1.2×10 <sup>-2</sup>         | 1.2×10 <sup>1</sup>                                     | 2.1×10 <sup>-1</sup>            | 5.1×10 <sup>2</sup>              | 1.6×10 <sup>-2</sup>             |                      |
| L222V   | 1.1×10 <sup>2</sup>               | 4.7×10 <sup>-1</sup>       | 9.9×10 <sup>1</sup>   | 1.2×10 <sup>-1</sup>       | 1.1×10 <sup>6</sup>                                   | 3.3×10 <sup>-1</sup>          | 3.6×10 <sup>5</sup>                                  | <b>7.2×10<sup>-3</sup></b>   | 9.3                                                     | 1.4×10 <sup>-2</sup>            | 6.5×10 <sup>2</sup>              | 1.4×10 <sup>-1</sup>             |                      |
| P223G   | 9.4×10 <sup>1</sup>               | 1.8×10 <sup>-1</sup>       | 6.6×10 <sup>1</sup>   | 6.4×10 <sup>-2</sup>       | 1.4×10 <sup>6</sup>                                   | 9.4×10 <sup>-1</sup>          | 3.7×10 <sup>5</sup>                                  | 5.5×10 <sup>-2</sup>         | 1.4×10 <sup>1</sup>                                     | 6.4×10 <sup>-1</sup>            | 5.0×10 <sup>2</sup>              | <b>2.2×10<sup>-3</sup></b>       |                      |
| P223V   | 1.2×10 <sup>2</sup>               | 7.9×10 <sup>-1</sup>       | 7.4×10 <sup>1</sup>   | 2.1×10 <sup>-1</sup>       | 1.6×10 <sup>6</sup>                                   | 6.8×10 <sup>-1</sup>          | 1.6×10 <sup>5</sup>                                  | <b>6.0×10<sup>-4</sup></b>   | 1.1×10 <sup>1</sup>                                     | 1.5×10 <sup>-1</sup>            | 6.0×10 <sup>2</sup>              | 5.7×10 <sup>-1</sup>             |                      |
| I224G   | 1.0×10 <sup>2</sup>               | 2.7×10 <sup>-1</sup>       | 7.6×10 <sup>1</sup>   | 4.2×10 <sup>-1</sup>       | 1.4×10 <sup>6</sup>                                   | 9.7×10 <sup>-1</sup>          | 5.2×10 <sup>5</sup>                                  | 4.5×10 <sup>-1</sup>         | 1.2×10 <sup>1</sup>                                     | 2.7×10 <sup>-1</sup>            | 5.4×10 <sup>2</sup>              | 4.8×10 <sup>-2</sup>             |                      |
| I224V   | 5.9×10 <sup>1</sup>               | 1.5×10 <sup>-2</sup>       | 9.7×10 <sup>1</sup>   | 2.9×10 <sup>-1</sup>       | 7.4×10 <sup>5</sup>                                   | 6.8×10 <sup>-2</sup>          | 2.9×10 <sup>5</sup>                                  | <b>8.3×10<sup>-3</sup></b>   | 7.4                                                     | <b>7.7×10<sup>-3</sup></b>      | 7.2×10 <sup>2</sup>              | <b>1.1×10<sup>-3</sup></b>       |                      |
| N225G   | 2.0×10 <sup>2</sup>               | <b>4.7×10<sup>-3</sup></b> | 6.8×10 <sup>1</sup>   | 1.9×10 <sup>-1</sup>       | 2.5×10 <sup>6</sup>                                   | 1.3×10 <sup>-2</sup>          | 4.0×10 <sup>5</sup>                                  | 1.3×10 <sup>-1</sup>         | 1.9×10 <sup>1</sup>                                     | 4.7×10 <sup>-1</sup>            | 6.1×10 <sup>2</sup>              | 7.9×10 <sup>-1</sup>             |                      |
| N225V   | 1.6×10 <sup>2</sup>               | 1.7×10 <sup>-2</sup>       | 1.1×10 <sup>2</sup>   | 1.6×10 <sup>-2</sup>       | 1.5×10 <sup>6</sup>                                   | 7.1×10 <sup>-1</sup>          | 5.4×10 <sup>5</sup>                                  | 5.8×10 <sup>-1</sup>         | 1.5×10 <sup>1</sup>                                     | 6.8×10 <sup>-1</sup>            | 6.9×10 <sup>2</sup>              | <b>5.7×10<sup>-3</sup></b>       |                      |
| Q226G   | 7.4×10 <sup>1</sup>               | 1.1×10 <sup>-1</sup>       | 4.9×10 <sup>1</sup>   | 1.4×10 <sup>-2</sup>       | 1.3×10 <sup>6</sup>                                   | 7.8×10 <sup>-1</sup>          | 2.8×10 <sup>5</sup>                                  | 5.7×10 <sup>-2</sup>         | 1.4×10 <sup>1</sup>                                     | 5.2×10 <sup>-1</sup>            | 4.4×10 <sup>2</sup>              | <b>2.0×10<sup>-4</sup></b>       |                      |
| Q226V   | 1.6×10 <sup>2</sup>               | 2.1×10 <sup>-2</sup>       | 9.3×10 <sup>1</sup>   | 3.1×10 <sup>-1</sup>       | 1.9×10 <sup>6</sup>                                   | 9.9×10 <sup>-2</sup>          | 4.8×10 <sup>5</sup>                                  | 1.4×10 <sup>-1</sup>         | 1.3×10 <sup>1</sup>                                     | 3.5×10 <sup>-1</sup>            | 6.5×10 <sup>2</sup>              | 1.5×10 <sup>-1</sup>             |                      |
| Y227G   | 2.5×10 <sup>1</sup>               | <b>0</b>                   | 4.0×10 <sup>1</sup>   | <b>1.×10<sup>-4</sup></b>  | 4.9×10 <sup>5</sup>                                   | <b>4.5×10<sup>-3</sup></b>    | 1.4×10 <sup>5</sup>                                  | <b>8.0×10<sup>-3</sup></b>   | 2.7                                                     | <b>5.0×10<sup>-4</sup></b>      | 3.0×10 <sup>2</sup>              | <b>2.0×10<sup>-4</sup></b>       |                      |
| Y227V   | 4.5×10 <sup>1</sup>               | <b>2.7×10<sup>-3</sup></b> | 7.3×10 <sup>1</sup>   | 2.7×10 <sup>-1</sup>       | 7.3×10 <sup>5</sup>                                   | 6.5×10 <sup>-2</sup>          | 1.9×10 <sup>5</sup>                                  | <b>2.9×10<sup>-3</sup></b>   | 5.6                                                     | 5.4×10 <sup>-2</sup>            | 4.3×10 <sup>2</sup>              | <b>4.0×10<sup>-4</sup></b>       |                      |
| T228G   | 7.4×10 <sup>1</sup>               | 5.6×10 <sup>-2</sup>       | 6.9×10 <sup>1</sup>   | 1.5×10 <sup>-1</sup>       | 7.4×10 <sup>5</sup>                                   | 8.8×10 <sup>-2</sup>          | 1.2×10 <sup>5</sup>                                  | <b>0</b>                     | 1.3×10 <sup>1</sup>                                     | 4.4×10 <sup>-1</sup>            | 6.4×10 <sup>2</sup>              | 4.8×10 <sup>-1</sup>             |                      |
| T228V   | 1.1×10 <sup>2</sup>               | 3.8×10 <sup>-1</sup>       | 9.3×10 <sup>1</sup>   | 4.0×10 <sup>-1</sup>       | 1.1×10 <sup>6</sup>                                   | 4.4×10 <sup>-1</sup>          | 4.3×10 <sup>5</sup>                                  | 1.1×10 <sup>-1</sup>         | 1.0×10 <sup>1</sup>                                     | 1.7×10 <sup>-1</sup>            | 6.7×10 <sup>2</sup>              | 7.7×10 <sup>-2</sup>             |                      |
| E229G   | 4.9×10 <sup>1</sup>               | <b>1.4×10<sup>-3</sup></b> | 5.1×10 <sup>1</sup>   | <b>3.1×10<sup>-3</sup></b> | 8.9×10 <sup>5</sup>                                   | 1.0×10 <sup>-1</sup>          | 1.6×10 <sup>5</sup>                                  | <b>4.0×10<sup>-4</sup></b>   | 6.1                                                     | <b>1.×10<sup>-4</sup></b>       | 5.3×10 <sup>2</sup>              | <b>8.7×10<sup>-3</sup></b>       |                      |
| E229V   | 5.8×10 <sup>1</sup>               | <b>3.6×10<sup>-3</sup></b> | 7.7×10 <sup>1</sup>   | 3.5×10 <sup>-1</sup>       | 8.1×10 <sup>5</sup>                                   | 5.3×10 <sup>-2</sup>          | 1.4×10 <sup>5</sup>                                  | 1.5×10 <sup>-2</sup>         | 7.9                                                     | 1.1×10 <sup>-2</sup>            | 5.8×10 <sup>2</sup>              | 2.7×10 <sup>-1</sup>             |                      |
| S230G   | 3.9×10 <sup>1</sup>               | <b>3.0×10<sup>-4</sup></b> | 5.6×10 <sup>1</sup>   | <b>7.9×10<sup>-3</sup></b> | 7.4×10 <sup>5</sup>                                   | 4.1×10 <sup>-2</sup>          | ≤ 2.9×10 <sup>5</sup>                                | 4.6×10 <sup>-2</sup>         | 8.1                                                     | 1.2×10 <sup>-2</sup>            | 4.9×10 <sup>2</sup>              | <b>1.0×10<sup>-3</sup></b>       |                      |
| S230V   | 3.3×10 <sup>1</sup>               | <b>0</b>                   | 5.8×10 <sup>1</sup>   | <b>6.7×10<sup>-3</sup></b> | 5.3×10 <sup>5</sup>                                   | <b>4.3×10<sup>-3</sup></b>    | 2.1×10 <sup>5</sup>                                  | <b>7.0×10<sup>-4</sup></b>   | 5.0                                                     | <b>3.7×10<sup>-3</sup></b>      | 3.5×10 <sup>2</sup>              | <b>1.×10<sup>-4</sup></b>        |                      |
| S231G   | 5.0×10 <sup>1</sup>               | 1.1×10 <sup>-2</sup>       | 6.0×10 <sup>1</sup>   | 7.4×10 <sup>-2</sup>       | 1.3×10 <sup>6</sup>                                   | 8.0×10 <sup>-1</sup>          | 3.9×10 <sup>5</sup>                                  | 6.8×10 <sup>-2</sup>         | 9.2                                                     | 4.3×10 <sup>-2</sup>            | 4.9×10 <sup>2</sup>              | <b>7.0×10<sup>-4</sup></b>       |                      |
| S231V   | 7.2×10 <sup>1</sup>               | 2.4×10 <sup>-2</sup>       | 7.8×10 <sup>1</sup>   | 4.4×10 <sup>-1</sup>       | 1.0×10 <sup>6</sup>                                   | 2.0×10 <sup>-1</sup>          | 3.4×10 <sup>5</sup>                                  | 4.4×10 <sup>-2</sup>         | 1.1×10 <sup>1</sup>                                     | 1.8×10 <sup>-1</sup>            | 5.8×10 <sup>2</sup>              | 2.4×10 <sup>-1</sup>             |                      |
| E232G   | 1.1×10 <sup>2</sup>               | 6.0×10 <sup>-1</sup>       | 7.9×10 <sup>1</sup>   | 5.6×10 <sup>-1</sup>       | 1.2×10 <sup>6</sup>                                   | 5.9×10 <sup>-1</sup>          | 3.5×10 <sup>5</sup>                                  | 5.1×10 <sup>-2</sup>         | 1.5×10 <sup>1</sup>                                     | 7.9×10 <sup>-1</sup>            | 6.2×10 <sup>2</sup>              | 8.9×10 <sup>-1</sup>             |                      |
| E232V   | 7.7×10 <sup>1</sup>               | 5.5×10 <sup>-2</sup>       | 8.9×10 <sup>1</sup>   | 7.1×10 <sup>-1</sup>       | 9.2×10 <sup>5</sup>                                   | 1.6×10 <sup>-1</sup>          | 5.1×10 <sup>5</sup>                                  | 3.9×10 <sup>-1</sup>         | 1.1×10 <sup>1</sup>                                     | 2.1×10 <sup>-1</sup>            | 7.7×10 <sup>2</sup>              | 2.2×10 <sup>-1</sup>             |                      |
| D233G   | 1.1×10 <sup>1</sup>               | <b>0</b>                   | 2.5×10 <sup>1</sup>   | <b>0</b>                   | 4.5×10 <sup>5</sup>                                   | <b>7.0×10<sup>-4</sup></b>    | 2.9×10 <sup>4</sup>                                  | <b>1.×10<sup>-4</sup></b>    | 3.5                                                     | <b>1.×10<sup>-4</sup></b>       | 1.6×10 <sup>2</sup>              | <b>0</b>                         |                      |
| D233V   | 2.9×10 <sup>1</sup>               | <b>0</b>                   | 3.6×10 <sup>1</sup>   | <b>0</b>                   | 8.2×10 <sup>5</sup>                                   | 5.0×10 <sup>-2</sup>          | 8.6×10 <sup>4</sup>                                  | <b>1.4×10<sup>-3</sup></b>   | 7.4                                                     | 2.3×10 <sup>-2</sup>            | 2.1×10 <sup>2</sup>              | <b>0</b>                         |                      |
| N234G   | 8.9×10 <sup>1</sup>               | 1.7×10 <sup>-1</sup>       | 6.5×10 <sup>1</sup>   | 9.1×10 <sup>-2</sup>       | 1.4×10 <sup>6</sup>                                   | 8.8×10 <sup>-1</sup>          | 4.3×10 <sup>5</sup>                                  | 1.3×10 <sup>-1</sup>         | 1.5×10 <sup>1</sup>                                     | 6.9×10 <sup>-1</sup>            | 5.6×10 <sup>2</sup>              | 1.3×10 <sup>-1</sup>             |                      |
| N234V   | 1.1×10 <sup>2</sup>               | 4.4×10 <sup>-1</sup>       | 8.3×10 <sup>1</sup>   | 8.3×10 <sup>-1</sup>       | 1.3×10 <sup>6</sup>                                   | 8.2×10 <sup>-1</sup>          | 2.1×10 <sup>5</sup>                                  | <b>3.8×10<sup>-3</sup></b>   | 1.7×10 <sup>1</sup>                                     | 9.0×10 <sup>-1</sup>            | 6.1×10 <sup>2</sup>              | 6.7×10 <sup>-1</sup>             |                      |
| V235A   | 1.8×10 <sup>2</sup>               | 1.1×10 <sup>-2</sup>       | 9.5×10 <sup>1</sup>   | 3.2×10 <sup>-1</sup>       | 2.2×10 <sup>6</sup>                                   | 2.6×10 <sup>-2</sup>          | 4.2×10 <sup>5</sup>                                  | 1.5×10 <sup>-1</sup>         | 2.3×10 <sup>1</sup>                                     | 7.3×10 <sup>-2</sup>            | 6.2×10 <sup>2</sup>              | 7.3×10 <sup>-1</sup>             |                      |
| V235G   | 5.9×10 <sup>1</sup>               | <b>6.4×10<sup>-3</sup></b> | 7.2×10 <sup>1</sup>   | 1.9×10 <sup>-1</sup>       | 6.2×10 <sup>5</sup>                                   | 1.7×10 <sup>-2</sup>          | 2.8×10 <sup>5</sup>                                  | 5.9×10 <sup>-2</sup>         | 1.3×10 <sup>1</sup>                                     | 3.1×10 <sup>-1</sup>            | 6.0×10 <sup>2</sup>              | 4.5×10 <sup>-1</sup>             |                      |
| E236G   | 7.9×10 <sup>1</sup>               | 7.9×10 <sup>-2</sup>       | 6.1×10 <sup>1</sup>   | 3.3×10 <sup>-2</sup>       | 1.1×10 <sup>6</sup>                                   | 4.1×10 <sup>-1</sup>          | 4.0×10 <sup>5</sup>                                  | 1.2×10 <sup>-1</sup>         | 1.3×10 <sup>1</sup>                                     | 2.7×10 <sup>-1</sup>            | 5.1×10 <sup>2</sup>              | <b>8.9×10<sup>-3</sup></b>       |                      |
| E236V   | 1.3×10 <sup>2</sup>               | 7.1×10 <sup>-1</sup>       | 9.4×10 <sup>1</sup>   | 3.8×10 <sup>-1</sup>       | 1.2×10 <sup>6</sup>                                   | 4.4×10 <sup>-1</sup>          | 5.8×10 <sup>5</sup>                                  | 7.1×10 <sup>-1</sup>         | 1.4×10 <sup>1</sup>                                     | 4.9×10 <sup>-1</sup>            | 6.4×10 <sup>2</sup>              | 6.2×10 <sup>-1</sup>             |                      |
| W237G   | 2.9×10 <sup>1</sup>               | <b>0</b>                   | 2.3×10 <sup>1</sup>   | <b>0</b>                   | 1.1×10 <sup>6</sup>                                   | 2.7×10 <sup>-1</sup>          | 7.3×10 <sup>4</sup>                                  | <b>0</b>                     | 6.4                                                     | <b>6.0×10<sup>-4</sup></b>      | 1.8×10 <sup>2</sup>              | <b>0</b>                         |                      |
| W237V   | 1.0×10 <sup>1</sup>               | <b>0</b>                   | 4.1×10 <sup>1</sup>   | <b>0</b>                   | 5.0×10 <sup>5</sup>                                   | <b>1.3×10<sup>-3</sup></b>    | ≤ 2.7×10 <sup>4</sup>                                | <b>0</b>                     | 2.4                                                     | <b>7.0×10<sup>-4</sup></b>      | 2.2×10 <sup>2</sup>              | <b>0</b>                         |                      |
| E238G   | 1.1×10 <sup>1</sup>               | <b>0</b>                   | 2.7×10 <sup>1</sup>   | <b>0</b>                   | 4.1×10 <sup>5</sup>                                   | <b>7.0×10<sup>-4</sup></b>    | 4.8×10 <sup>4</sup>                                  | <b>0</b>                     | 2.4                                                     | <b>1.×10<sup>-4</sup></b>       | 1.9×10 <sup>2</sup>              | <b>0</b>                         |                      |
| E238V   | 3.5×10 <sup>1</sup>               | <b>2.4×10<sup>-3</sup></b> | 3.3×10 <sup>1</sup>   | <b>7.0×10<sup>-4</sup></b> | 1.0×10 <sup>6</sup>                                   | 3.6×10 <sup>-1</sup>          | 7.1×10 <sup>4</sup>                                  | 1.8×10 <sup>-2</sup>         | 4.4                                                     | <b>6.0×10<sup>-4</sup></b>      | 2.1×10 <sup>2</sup>              | <b>2.0×10<sup>-4</sup></b>       |                      |
| G239A   | 5.8×10 <sup>1</sup>               | <b>5.2×10<sup>-3</sup></b> | 6.4×10 <sup>1</sup>   | 5.2×10 <sup>-2</sup>       | 9.3×10 <sup>5</sup>                                   | 1.4×10 <sup>-1</sup>          | 4.2×10 <sup>5</sup>                                  | 1.5×10 <sup>-1</sup>         | 1.9×10 <sup>1</sup>                                     | 2.9×10 <sup>-1</sup>            | 5.5×10 <sup>2</sup>              | 1.4×10 <sup>-1</sup>             |                      |
| G239V   | 9.6×10 <sup>1</sup>               | 1.8×10 <sup>-1</sup>       | 8.9×10 <sup>1</sup>   | 7.0×10 <sup>-1</sup>       | 1.1×10 <sup>6</sup>                                   | 2.7×10 <sup>-1</sup>          | 3.4×10 <sup>5</sup>                                  | 3.2×10 <sup>-2</sup>         | 1.0×10 <sup>1</sup>                                     | 1.1×10 <sup>-1</sup>            | 6.0×10 <sup>2</sup>              | 6.4×10 <sup>-1</sup>             |                      |
| L240G   | 1.2×10 <sup>2</sup>               | 8.9×10 <sup>-1</sup>       | 5.2×10 <sup>1</sup>   | 2.0×10 <sup>-2</sup>       | 2.4×10 <sup>6</sup>                                   | 2.9×10 <sup>-2</sup>          | 7.5×10 <sup>5</sup>                                  | 2.5×10 <sup>-1</sup>         |                                                         |                                 |                                  |                                  |                      |

| Variant | $k_{cat}$ cMUP (s <sup>-1</sup> ) | $k_{cat}$ cMUP $p$ -value  | $K_M$ cMUP ( $\mu$ M) | $K_M$ cMUP $p$ -value      | $k_{cat}/K_M$ cMUP (M <sup>-1</sup> s <sup>-1</sup> ) | $k_{cat}/K_M$ cMUP $p$ -value | $k_{cat}/K_M$ MeP (M <sup>-1</sup> s <sup>-1</sup> ) | $k_{cat}/K_M$ MeP $p$ -value | $k_{cat}/K_M$ MecMUP (M <sup>-1</sup> s <sup>-1</sup> ) | $k_{cat}/K_M$ MecMUP $p$ -value | $K_i$ PO <sub>4</sub> ( $\mu$ M) | $K_i$ PO <sub>4</sub> $p$ -value |
|---------|-----------------------------------|----------------------------|-----------------------|----------------------------|-------------------------------------------------------|-------------------------------|------------------------------------------------------|------------------------------|---------------------------------------------------------|---------------------------------|----------------------------------|----------------------------------|
| P250G   | 3.8×10 <sup>1</sup>               | <b>1.4×10<sup>-3</sup></b> | 5.7×10 <sup>1</sup>   | 2.4×10 <sup>-2</sup>       | 7.5×10 <sup>5</sup>                                   | 7.7×10 <sup>-2</sup>          | 3.9×10 <sup>4</sup>                                  | <b>0</b>                     | 5.5                                                     | <b>9.0×10<sup>-4</sup></b>      | 5.1×10 <sup>2</sup>              | 1.8×10 <sup>-2</sup>             |
| P250V   | 6.0×10 <sup>1</sup>               | 2.6×10 <sup>-2</sup>       | 8.8×10 <sup>1</sup>   | 8.2×10 <sup>-1</sup>       | 7.5×10 <sup>5</sup>                                   | 6.2×10 <sup>-2</sup>          | 4.2×10 <sup>5</sup>                                  | 9.0×10 <sup>-2</sup>         | 7.5                                                     | 1.4×10 <sup>-2</sup>            | 5.7×10 <sup>2</sup>              | 1.7×10 <sup>-1</sup>             |
| Y251G   | 7.4                               | <b>0</b>                   | 2.3×10 <sup>1</sup>   | <b>0</b>                   | 2.8×10 <sup>5</sup>                                   | <b>0</b>                      | 2.5×10 <sup>4</sup>                                  | <b>0</b>                     | 2.7                                                     | <b>2.0×10<sup>-4</sup></b>      | 1.7×10 <sup>2</sup>              | <b>0</b>                         |
| Y251V   | 4.1×10 <sup>1</sup>               | <b>1.9×10<sup>-3</sup></b> | 7.1×10 <sup>1</sup>   | 2.2×10 <sup>-1</sup>       | 5.6×10 <sup>5</sup>                                   | 2.2×10 <sup>-2</sup>          | 2.6×10 <sup>5</sup>                                  | 1.0×10 <sup>-2</sup>         | 5.1                                                     | <b>4.8×10<sup>-3</sup></b>      | 5.1×10 <sup>2</sup>              | <b>9.6×10<sup>-3</sup></b>       |
| T252G   | 1.7×10 <sup>2</sup>               | 4.5×10 <sup>-2</sup>       | 8.4×10 <sup>1</sup>   | 9.4×10 <sup>-1</sup>       | 2.0×10 <sup>6</sup>                                   | 1.3×10 <sup>-1</sup>          | 5.5×10 <sup>5</sup>                                  | 6.5×10 <sup>-1</sup>         | 1.4×10 <sup>1</sup>                                     | 6.2×10 <sup>-1</sup>            | 5.9×10 <sup>2</sup>              | 4.9×10 <sup>-1</sup>             |
| T252V   | 1.5×10 <sup>2</sup>               | 1.5×10 <sup>-1</sup>       | 9.5×10 <sup>1</sup>   | 3.7×10 <sup>-1</sup>       | 1.5×10 <sup>6</sup>                                   | 8.7×10 <sup>-1</sup>          | 4.4×10 <sup>5</sup>                                  | 1.2×10 <sup>-1</sup>         | 1.0×10 <sup>1</sup>                                     | 1.4×10 <sup>-1</sup>            | 6.7×10 <sup>2</sup>              | 3.4×10 <sup>-1</sup>             |
| D253G   | 8.8×10 <sup>1</sup>               | 7.2×10 <sup>-2</sup>       | 7.4×10 <sup>1</sup>   | 2.6×10 <sup>-1</sup>       | 1.2×10 <sup>6</sup>                                   | 5.2×10 <sup>-1</sup>          | 3.7×10 <sup>5</sup>                                  | 5.6×10 <sup>-2</sup>         | 1.6×10 <sup>1</sup>                                     | 9.6×10 <sup>-1</sup>            | 5.3×10 <sup>2</sup>              | 1.0×10 <sup>-2</sup>             |
| D253V   | 8.0×10 <sup>1</sup>               | 4.6×10 <sup>-2</sup>       | 9.1×10 <sup>1</sup>   | 6.0×10 <sup>-1</sup>       | 1.3×10 <sup>6</sup>                                   | 7.0×10 <sup>-1</sup>          | 4.7×10 <sup>5</sup>                                  | 2.4×10 <sup>-1</sup>         | 1.1×10 <sup>1</sup>                                     | 2.3×10 <sup>-1</sup>            | 6.0×10 <sup>2</sup>              | 5.3×10 <sup>-1</sup>             |
| L254G   | 5.2×10 <sup>1</sup>               | 1.6×10 <sup>-2</sup>       | 5.5×10 <sup>1</sup>   | 2.7×10 <sup>-2</sup>       | 1.4×10 <sup>6</sup>                                   | 9.7×10 <sup>-1</sup>          | 3.8×10 <sup>5</sup>                                  | 7.1×10 <sup>-2</sup>         | 8.7                                                     | 3.1×10 <sup>-2</sup>            | 4.3×10 <sup>2</sup>              | <b>1.×10<sup>-4</sup></b>        |
| L254V   | 1.3×10 <sup>2</sup>               | 8.5×10 <sup>-1</sup>       | 8.6×10 <sup>1</sup>   | 9.3×10 <sup>-1</sup>       | 1.6×10 <sup>6</sup>                                   | 4.7×10 <sup>-1</sup>          | 8.6×10 <sup>5</sup>                                  | 1.0×10 <sup>-1</sup>         | 1.4×10 <sup>1</sup>                                     | 6.2×10 <sup>-1</sup>            | 6.1×10 <sup>2</sup>              | 7.7×10 <sup>-1</sup>             |
| A255G   | 9.2×10 <sup>1</sup>               | 1.3×10 <sup>-1</sup>       | 6.4×10 <sup>1</sup>   | 4.4×10 <sup>-2</sup>       | 1.5×10 <sup>6</sup>                                   | 8.5×10 <sup>-1</sup>          | 2.4×10 <sup>5</sup>                                  | 2.1×10 <sup>-2</sup>         | 2.1×10 <sup>1</sup>                                     | 1.9×10 <sup>-1</sup>            | 5.2×10 <sup>2</sup>              | <b>5.6×10<sup>-3</sup></b>       |
| A255V   | 9.9×10 <sup>1</sup>               | 1.9×10 <sup>-1</sup>       | 7.7×10 <sup>1</sup>   | 2.9×10 <sup>-1</sup>       | 1.3×10 <sup>6</sup>                                   | 5.1×10 <sup>-1</sup>          | 4.4×10 <sup>5</sup>                                  | 4.5×10 <sup>-2</sup>         | 1.2×10 <sup>1</sup>                                     | 1.6×10 <sup>-1</sup>            | 5.5×10 <sup>2</sup>              | 1.4×10 <sup>-2</sup>             |
| K256G   | 1.0×10 <sup>2</sup>               | 3.8×10 <sup>-1</sup>       | 6.6×10 <sup>1</sup>   | 1.1×10 <sup>-1</sup>       | 1.6×10 <sup>6</sup>                                   | 7.0×10 <sup>-1</sup>          | 4.3×10 <sup>5</sup>                                  | 2.2×10 <sup>-1</sup>         | 1.9×10 <sup>1</sup>                                     | 3.6×10 <sup>-1</sup>            | 5.3×10 <sup>2</sup>              | 1.7×10 <sup>-2</sup>             |
| K256V   | 4.0×10 <sup>1</sup>               | <b>8.6×10<sup>-3</sup></b> | 1.0×10 <sup>2</sup>   | 2.1×10 <sup>-1</sup>       | 4.2×10 <sup>5</sup>                                   | 2.0×10 <sup>-2</sup>          | 1.1×10 <sup>5</sup>                                  | <b>0</b>                     | ≤ 1.9                                                   | <b>3.0×10<sup>-4</sup></b>      | 6.5×10 <sup>2</sup>              | 4.7×10 <sup>-1</sup>             |
| D257G   | 6.2×10 <sup>1</sup>               | 4.1×10 <sup>-2</sup>       | 3.2×10 <sup>1</sup>   | <b>6.0×10<sup>-4</sup></b> | 2.3×10 <sup>6</sup>                                   | 4.4×10 <sup>-2</sup>          | 3.4×10 <sup>5</sup>                                  | 8.7×10 <sup>-2</sup>         | 1.9×10 <sup>1</sup>                                     | 4.3×10 <sup>-1</sup>            | 4.2×10 <sup>2</sup>              | <b>1.9×10<sup>-3</sup></b>       |
| D257V   | 1.2×10 <sup>2</sup>               | 9.6×10 <sup>-1</sup>       | 7.5×10 <sup>1</sup>   | 3.4×10 <sup>-1</sup>       | 1.7×10 <sup>6</sup>                                   | 3.5×10 <sup>-1</sup>          | 1.5×10 <sup>5</sup>                                  | 2.3×10 <sup>-2</sup>         | 1.4×10 <sup>1</sup>                                     | 6.8×10 <sup>-1</sup>            | 5.1×10 <sup>2</sup>              | <b>7.3×10<sup>-3</sup></b>       |
| Y258G   | 1.3×10 <sup>2</sup>               | 6.2×10 <sup>-1</sup>       | 7.0×10 <sup>1</sup>   | 2.1×10 <sup>-1</sup>       | 1.9×10 <sup>6</sup>                                   | 2.0×10 <sup>-1</sup>          | 3.9×10 <sup>5</sup>                                  | 7.6×10 <sup>-2</sup>         | 1.4×10 <sup>1</sup>                                     | 5.3×10 <sup>-1</sup>            | 5.0×10 <sup>2</sup>              | <b>6.0×10<sup>-3</sup></b>       |
| Y258V   | 1.5×10 <sup>2</sup>               | 1.2×10 <sup>-1</sup>       | 7.4×10 <sup>1</sup>   | 3.2×10 <sup>-1</sup>       | 1.9×10 <sup>6</sup>                                   | 2.0×10 <sup>-1</sup>          | 8.7×10 <sup>5</sup>                                  | 4.0×10 <sup>-2</sup>         | 1.8×10 <sup>1</sup>                                     | 6.4×10 <sup>-1</sup>            | 5.1×10 <sup>2</sup>              | 1.1×10 <sup>-2</sup>             |
| E259G   | 1.3×10 <sup>2</sup>               | 6.9×10 <sup>-1</sup>       | 6.7×10 <sup>1</sup>   | 1.0×10 <sup>-1</sup>       | 1.8×10 <sup>6</sup>                                   | 2.1×10 <sup>-1</sup>          | 2.2×10 <sup>5</sup>                                  | <b>6.0×10<sup>-3</sup></b>   | 2.2×10 <sup>1</sup>                                     | 4.0×10 <sup>-2</sup>            | 4.4×10 <sup>2</sup>              | <b>0</b>                         |
| E259V   | 1.7×10 <sup>2</sup>               | 5.2×10 <sup>-2</sup>       | 9.6×10 <sup>1</sup>   | 3.3×10 <sup>-1</sup>       | 1.7×10 <sup>6</sup>                                   | 5.5×10 <sup>-1</sup>          | 5.0×10 <sup>5</sup>                                  | 3.4×10 <sup>-1</sup>         | 1.8×10 <sup>1</sup>                                     | 6.7×10 <sup>-1</sup>            | 5.8×10 <sup>2</sup>              | 2.7×10 <sup>-1</sup>             |
| A260G   | 8.5×10 <sup>1</sup>               | 2.0×10 <sup>-1</sup>       | 5.8×10 <sup>1</sup>   | 5.4×10 <sup>-2</sup>       | 2.0×10 <sup>6</sup>                                   | 1.5×10 <sup>-1</sup>          | 4.2×10 <sup>5</sup>                                  | 1.2×10 <sup>-1</sup>         | 2.1×10 <sup>1</sup>                                     | 1.2×10 <sup>-1</sup>            | 5.7×10 <sup>2</sup>              | 1.8×10 <sup>-1</sup>             |
| A260V   | 1.7×10 <sup>2</sup>               | 1.4×10 <sup>-2</sup>       | 9.4×10 <sup>1</sup>   | 3.4×10 <sup>-1</sup>       | 2.0×10 <sup>6</sup>                                   | 8.2×10 <sup>-2</sup>          | 4.7×10 <sup>5</sup>                                  | 1.8×10 <sup>-1</sup>         | 1.4×10 <sup>1</sup>                                     | 6.5×10 <sup>-1</sup>            | 6.7×10 <sup>2</sup>              | 9.2×10 <sup>-2</sup>             |
| K261G   | 6.8×10 <sup>1</sup>               | 8.0×10 <sup>-2</sup>       | 1.0×10 <sup>2</sup>   | 2.7×10 <sup>-1</sup>       | 8.8×10 <sup>5</sup>                                   | 2.1×10 <sup>-1</sup>          | 6.2×10 <sup>5</sup>                                  | 9.5×10 <sup>-1</sup>         | 1.7×10 <sup>1</sup>                                     | 7.5×10 <sup>-1</sup>            | 6.3×10 <sup>2</sup>              | 5.1×10 <sup>-1</sup>             |
| K261V   | 1.0×10 <sup>2</sup>               | 4.5×10 <sup>-1</sup>       | 9.4×10 <sup>1</sup>   | 4.8×10 <sup>-1</sup>       | 1.4×10 <sup>6</sup>                                   | 8.6×10 <sup>-1</sup>          | 4.3×10 <sup>5</sup>                                  | 9.8×10 <sup>-2</sup>         | 1.1×10 <sup>1</sup>                                     | 1.6×10 <sup>-1</sup>            | 6.2×10 <sup>2</sup>              | 7.9×10 <sup>-1</sup>             |
| K262G   | 1.0×10 <sup>2</sup>               | 3.7×10 <sup>-1</sup>       | 7.6×10 <sup>1</sup>   | 3.7×10 <sup>-1</sup>       | 1.6×10 <sup>6</sup>                                   | 6.5×10 <sup>-1</sup>          | 4.5×10 <sup>5</sup>                                  | 2.1×10 <sup>-1</sup>         | 2.5×10 <sup>1</sup>                                     | <b>1.9×10<sup>-3</sup></b>      | 4.6×10 <sup>2</sup>              | <b>0</b>                         |
| K262V   | 1.0×10 <sup>2</sup>               | 3.1×10 <sup>-1</sup>       | 7.1×10 <sup>1</sup>   | 1.2×10 <sup>-1</sup>       | 1.3×10 <sup>6</sup>                                   | 7.2×10 <sup>-1</sup>          | 4.3×10 <sup>5</sup>                                  | 1.1×10 <sup>-1</sup>         | 1.8×10 <sup>1</sup>                                     | 6.1×10 <sup>-1</sup>            | 5.3×10 <sup>2</sup>              | 1.6×10 <sup>-2</sup>             |
| G263A   | 8.5×10 <sup>1</sup>               | 7.9×10 <sup>-2</sup>       | 7.0×10 <sup>1</sup>   | 1.5×10 <sup>-1</sup>       | 1.1×10 <sup>6</sup>                                   | 3.0×10 <sup>-1</sup>          | 4.0×10 <sup>5</sup>                                  | 1.8×10 <sup>-1</sup>         | 2.0×10 <sup>1</sup>                                     | 2.0×10 <sup>-1</sup>            | 5.6×10 <sup>2</sup>              | 7.9×10 <sup>-2</sup>             |
| G263V   | 9.7×10 <sup>1</sup>               | 1.4×10 <sup>-1</sup>       | 8.2×10 <sup>1</sup>   | 6.6×10 <sup>-1</sup>       | 1.1×10 <sup>6</sup>                                   | 2.1×10 <sup>-1</sup>          | 6.3×10 <sup>5</sup>                                  | 9.5×10 <sup>-1</sup>         | 1.6×10 <sup>1</sup>                                     | 9.8×10 <sup>-1</sup>            | 5.3×10 <sup>2</sup>              | 2.4×10 <sup>-2</sup>             |
| L264G   | 6.5×10 <sup>1</sup>               | 1.3×10 <sup>-2</sup>       | 6.3×10 <sup>1</sup>   | 4.2×10 <sup>-2</sup>       | 1.0×10 <sup>6</sup>                                   | 2.1×10 <sup>-1</sup>          | 3.3×10 <sup>5</sup>                                  | 4.3×10 <sup>-2</sup>         | 1.1×10 <sup>1</sup>                                     | 1.2×10 <sup>-1</sup>            | 4.0×10 <sup>2</sup>              | <b>0</b>                         |
| L264V   | 6.0×10 <sup>1</sup>               | 3.6×10 <sup>-2</sup>       | 1.0×10 <sup>2</sup>   | 1.5×10 <sup>-1</sup>       | 5.8×10 <sup>5</sup>                                   | 5.0×10 <sup>-2</sup>          | 5.3×10 <sup>5</sup>                                  | 5.4×10 <sup>-1</sup>         | ≤ 1.9                                                   | <b>1.7×10<sup>-3</sup></b>      | 6.9×10 <sup>2</sup>              | 5.1×10 <sup>-2</sup>             |
| I265G   | 2.9×10 <sup>1</sup>               | <b>0</b>                   | 4.2×10 <sup>1</sup>   | <b>2.0×10<sup>-4</sup></b> | 7.4×10 <sup>5</sup>                                   | 2.6×10 <sup>-2</sup>          | 7.2×10 <sup>4</sup>                                  | <b>5.0×10<sup>-4</sup></b>   | 6.6                                                     | <b>9.0×10<sup>-4</sup></b>      | 3.0×10 <sup>2</sup>              | <b>0</b>                         |
| I265V   | 5.8×10 <sup>1</sup>               | 2.9×10 <sup>-2</sup>       | 8.8×10 <sup>1</sup>   | 8.3×10 <sup>-1</sup>       | 9.3×10 <sup>5</sup>                                   | 2.4×10 <sup>-1</sup>          | 7.0×10 <sup>5</sup>                                  | 5.4×10 <sup>-1</sup>         | 8.0                                                     | 2.9×10 <sup>-2</sup>            | 5.5×10 <sup>2</sup>              | 5.1×10 <sup>-2</sup>             |
| R266G   | 1.3×10 <sup>2</sup>               | 7.8×10 <sup>-1</sup>       | 6.1×10 <sup>1</sup>   | 3.3×10 <sup>-2</sup>       | 2.3×10 <sup>6</sup>                                   | 1.2×10 <sup>-2</sup>          | ≤ 1.4×10 <sup>5</sup>                                | <b>2.0×10<sup>-3</sup></b>   | 2.8×10 <sup>1</sup>                                     | <b>1.×10<sup>-4</sup></b>       | 6.5×10 <sup>2</sup>              | 2.6×10 <sup>-1</sup>             |
| R266V   | 2.2×10 <sup>2</sup>               | <b>1.×10<sup>-4</sup></b>  | 1.2×10 <sup>2</sup>   | <b>4.0×10<sup>-4</sup></b> | 1.6×10 <sup>6</sup>                                   | 4.8×10 <sup>-1</sup>          | 8.9×10 <sup>4</sup>                                  | <b>0</b>                     | 4.4×10 <sup>1</sup>                                     | <b>0</b>                        | 1.7×10 <sup>3</sup>              | <b>0</b>                         |
| T267G   | 1.0×10 <sup>2</sup>               | 4.3×10 <sup>-1</sup>       | 5.1×10 <sup>1</sup>   | <b>5.5×10<sup>-3</sup></b> | 2.6×10 <sup>6</sup>                                   | <b>1.3×10<sup>-3</sup></b>    | 5.6×10 <sup>5</sup>                                  | 6.6×10 <sup>-1</sup>         | 2.4×10 <sup>1</sup>                                     | 1.2×10 <sup>-2</sup>            | 4.5×10 <sup>2</sup>              | <b>3.0×10<sup>-4</sup></b>       |
| T267V   | 1.8×10 <sup>2</sup>               | <b>3.8×10<sup>-3</sup></b> | 8.3×10 <sup>1</sup>   | 7.2×10 <sup>-1</sup>       | 2.1×10 <sup>6</sup>                                   | 2.9×10 <sup>-2</sup>          | 4.7×10 <sup>5</sup>                                  | 1.6×10 <sup>-1</sup>         | 1.2×10 <sup>1</sup>                                     | 3.2×10 <sup>-1</sup>            | 6.0×10 <sup>2</sup>              | 6.4×10 <sup>-1</sup>             |
| T268V   | 1.4×10 <sup>2</sup>               | 1.9×10 <sup>-1</sup>       | 7.0×10 <sup>1</sup>   | 7.9×10 <sup>-2</sup>       | 2.1×10 <sup>6</sup>                                   | 2.2×10 <sup>-2</sup>          | 4.6×10 <sup>5</sup>                                  | 5.6×10 <sup>-2</sup>         | 1.4×10 <sup>1</sup>                                     | 4.5×10 <sup>-1</sup>            | 5.4×10 <sup>2</sup>              | <b>6.0×10<sup>-3</sup></b>       |
| P269G   | 1.2×10 <sup>2</sup>               | 8.9×10 <sup>-1</sup>       | 9.1×10 <sup>1</sup>   | 5.7×10 <sup>-1</sup>       | 1.4×10 <sup>6</sup>                                   | 9.7×10 <sup>-1</sup>          | 2.2×10 <sup>5</sup>                                  | <b>7.1×10<sup>-3</sup></b>   | 6.6                                                     | 1.3×10 <sup>-2</sup>            | 7.3×10 <sup>2</sup>              | <b>4.0×10<sup>-3</sup></b>       |
| P269V   | 1.7×10 <sup>2</sup>               | 2.1×10 <sup>-2</sup>       | 8.1×10 <sup>1</sup>   | 6.3×10 <sup>-1</sup>       | 2.3×10 <sup>6</sup>                                   | 1.1×10 <sup>-2</sup>          | 2.4×10 <sup>5</sup>                                  | <b>7.5×10<sup>-3</sup></b>   | 9.9                                                     | 6.3×10 <sup>-2</sup>            | 5.7×10 <sup>2</sup>              | 1.2×10 <sup>-1</sup>             |
| F270G   | 5.2×10 <sup>1</sup>               | 1.6×10 <sup>-2</sup>       | 5.1×10 <sup>1</sup>   | 1.8×10 <sup>-2</sup>       | 1.4×10 <sup>6</sup>                                   | 9.5×10 <sup>-1</sup>          | 3.7×10 <sup>5</sup>                                  | 5.4×10 <sup>-2</sup>         | 1.4×10 <sup>1</sup>                                     | 4.4×10 <sup>-1</sup>            | 4.8×10 <sup>2</sup>              | <b>2.0×10<sup>-4</sup></b>       |
| F270V   | 2.1×10 <sup>2</sup>               | <b>2.0×10<sup>-4</sup></b> | 8.8×10 <sup>1</sup>   | 8.0×10 <sup>-1</sup>       | 2.3×10 <sup>6</sup>                                   | <b>3.2×10<sup>-3</sup></b>    | 3.0×10 <sup>5</sup>                                  | <b>6.6×10<sup>-3</sup></b>   | 1.4×10 <sup>1</sup>                                     | 6.7×10 <sup>-1</sup>            | 6.0×10 <sup>2</sup>              | 6.5×10 <sup>-1</sup>             |
| G271A   | 8.6×10 <sup>1</sup>               | 1.2×10 <sup>-1</sup>       | 5.4×10 <sup>1</sup>   | 1.3×10 <sup>-2</sup>       | 2.0×10 <sup>6</sup>                                   | 1.5×10 <sup>-1</sup>          | 3.0×10 <sup>5</sup>                                  | 2.1×10 <sup>-2</sup>         | 9.4                                                     | 2.2×10 <sup>-2</sup>            | 5.0×10 <sup>2</sup>              | <b>5.0×10<sup>-4</sup></b>       |
| G271V   | 3.8×10 <sup>1</sup>               | <b>1.×10<sup>-4</sup></b>  | 4.2×10 <sup>1</sup>   | <b>4.0×10<sup>-4</sup></b> | 1.2×10 <sup>6</sup>                                   | 5.4×10 <sup>-1</sup>          | 9.1×10 <sup>4</sup>                                  | <b>9.0×10<sup>-4</sup></b>   | 2.5×10 <sup>1</sup>                                     | 1.2×10 <sup>-2</sup>            | 4.1×10 <sup>2</sup>              | <b>5.0×10<sup>-4</sup></b>       |
| N272G   | 7.9×10 <sup>1</sup>               | 1.3×10 <sup>-1</sup>       | 6.9×10 <sup>1</sup>   | 1.3×10 <sup>-1</sup>       | 1.1×10 <sup>6</sup>                                   | 3.7×10 <sup>-1</sup>          | 1.1×10 <sup>5</sup>                                  | <b>1.1×10<sup>-3</sup></b>   | 8.2                                                     | 1.6×10 <sup>-2</sup>            | 6.6×10 <sup>2</sup>              | 1.5×10 <sup>-1</sup>             |
| N272V   | 4.1×10 <sup>1</sup>               | 1.0×10 <sup>-2</sup>       | 8.1×10 <sup>1</sup>   | 7.7×10 <sup>-1</sup>       | 4.5×10 <sup>5</sup>                                   | 2.3×10 <sup>-2</sup>          | 2.0×10 <sup>5</sup>                                  | <b>4.0×10<sup>-3</sup></b>   | ≤ 1.8                                                   | <b>0</b>                        | 4.6×10 <sup>2</sup>              | <b>0</b>                         |
| T273G   | 5.5×10 <sup>1</sup>               | <b>4.8×10<sup>-3</sup></b> | 6.4×10 <sup>1</sup>   | 5.2×10 <sup>-2</sup>       | 1.1×10 <sup>6</sup>                                   | 3.1×10 <sup>-1</sup>          | 1.6×10 <sup>5</sup>                                  | 1.2×10 <sup>-2</sup>         | 1.3×10 <sup>1</sup>                                     | 3.6×10 <sup>-1</sup>            | 5.3×10 <sup>2</sup>              | <b>3.0×10<sup>-3</sup></b>       |
| T273V   | 2.4×10 <sup>2</sup>               | <b>0</b>                   | 9.2×10 <sup>1</sup>   | 4.7×10 <sup>-1</sup>       | 2.6×10 <sup>6</sup>                                   | <b>1.×10<sup>-4</sup></b>     | 1.7×10 <sup>5</sup>                                  | <b>3.0×10<sup>-4</sup></b>   | 1.5×10 <sup>1</sup>                                     | 7.4×10 <sup>-1</sup>            | 7.3×10 <sup>2</sup>              | <b>2.4×10<sup>-3</sup></b>       |
| L274G   | 1.2×10 <sup>1</sup>               | <b>2.0×10<sup>-3</sup></b> | 7.4×10 <sup>1</sup>   | 3.9×10 <sup>-1</sup>       | 1.7×10 <sup>5</sup>                                   | <b>5.4×10<sup>-3</sup></b>    | 2.2×10 <sup>4</sup>                                  | <b>4.0×10<sup>-4</sup></b>   | ≤ 9.9×10 <sup>-1</sup>                                  | <b>1.×10<sup>-4</sup></b>       | 6.0×10 <sup>2</sup>              | 7.5×10 <sup>-1</sup>             |
| L274V   | 1.6×10 <sup>2</sup>               | 7.9×10 <sup>-2</sup>       | 1.1×10 <sup>2</sup>   | 9.1×10 <sup>-2</sup>       | 1.4×10 <sup>6</sup>                                   | 9.9×10 <sup>-1</sup>          | 4.7×10 <sup>5</sup>                                  | 1.6×10 <sup>-1</sup>         | 1.1×10 <sup>1</sup>                                     | 2.4×10 <sup>-1</sup>            | 6.5×10 <sup>2</sup>              | 3.1×10 <sup>-1</sup>             |
| T275G   | 5.3×10 <sup>1</sup>               | <b>1.3×10<sup>-3</sup></b> | 6.4×10 <sup>1</sup>   | 2.6×10 <sup>-2</sup>       | 8.3×10 <sup>5</sup>                                   | 5.6×10 <sup>-2</sup>          | 1.0×10 <sup>5</sup>                                  | <b>0</b>                     | 6.8                                                     | <b>4.0×10<sup>-4</sup></b>      | 6.2×10 <sup>2</sup>              | 7.5×10 <sup>-1</sup>             |
| T275V   | 1.2×10 <sup>2</sup>               | 9.0×10 <sup>-1</sup>       | 7.4×10 <sup>1</sup>   | 3.0×10 <sup>-1</sup>       | 1.8×10 <sup>6</sup>                                   | 3.4×10 <sup>-1</sup>          | 2.9×10 <sup>5</sup>                                  | <b>5.3×10<sup>-3</sup></b>   | 1.7×10 <sup>1</sup>                                     | 8.9×10 <sup>-1</sup>            | 6.1×10 <sup>2</sup>              | 8.7×10 <sup>-1</sup>             |
| L276G   | 2.7                               | <b>3.0×10<sup>-4</sup></b> | 7.9×10 <sup>1</sup>   | 6.2×10 <sup>-1</sup>       | 3.3×10 <sup>4</sup>                                   | <b>1.4×10<sup>-3</sup></b>    | 6.0×10 <sup>3</sup>                                  | <b>1.0×10<sup>-3</sup></b>   | ≤ 1.1                                                   | <b>0</b>                        | 3.8×10 <sup>2</sup>              | 2.2×10 <sup>-2</sup>             |
| L276V   | 1.4×10 <sup>2</sup>               | 4.2×10 <sup>-1</sup>       | 9.1×10 <sup>1</sup>   | 4.6×10 <sup>-1</sup>       | 1.4×10 <sup>6</sup>                                   | 9.0×10 <sup>-1</sup>          | 2.7×10 <sup>5</sup>                                  | 1.4×10 <sup>-2</sup>         | 1.2×10 <sup>1</sup>                                     | 2.4×10 <sup>-1</sup>            | 6.1×10 <sup>2</sup>              | 8.1×10 <sup>-1</sup>             |
| Q277G   | 1.5×10 <sup>2</sup>               | 1.6×10 <sup>-1</sup>       | 8.5×10 <sup>1</sup>   | 9.9×10 <sup>-1</sup>       | 1.7×10 <sup>6</sup>                                   | 4.9×10 <sup>-1</sup>          | 1.7×10 <sup>5</sup>                                  | <b>3.5×10<sup>-3</sup></b>   | 1.6×10 <sup>1</sup>                                     | 9.9×10 <sup>-1</sup>            | 6.1×10 <sup>2</sup>              | 6.0×10 <sup>-1</sup>             |
| Q277V   | 1.4×10 <sup>2</sup>               | 3.4×10 <sup>-1</sup>       | 9.4×10 <sup>1</sup>   | 4.4×10 <sup>-1</sup>       | 1.4×10 <sup>6</sup>                                   | 8.2×10 <sup>-1</sup>          | 3.5×10 <sup>5</sup>                                  | 5.5×10 <sup>-2</sup>         | 1.1×10 <sup>1</sup>                                     | 2.8×10 <sup>-1</sup>            | 6.4×10 <sup>2</sup>              | 4.3×10 <sup>-1</sup>             |
| M278G   | 1.5×10 <sup>1</sup>               | <b>1.×10<sup>-4</sup></b>  | 5.8×10 <sup>1</sup>   |                            |                                                       |                               |                                                      |                              |                                                         |                                 |                                  |                                  |

| Variant | $k_{cat}$ cMUP (s <sup>-1</sup> ) | $k_{cat}$ cMUP $p$ -value  | $K_M$ cMUP ( $\mu$ M) | $K_M$ cMUP $p$ -value      | $k_{cat}/K_M$ cMUP (M <sup>-1</sup> s <sup>-1</sup> ) | $k_{cat}/K_M$ cMUP $p$ -value | $k_{cat}/K_M$ MeP (M <sup>-1</sup> s <sup>-1</sup> ) | $k_{cat}/K_M$ MeP $p$ -value | $k_{cat}/K_M$ MecMUP (M <sup>-1</sup> s <sup>-1</sup> ) | $k_{cat}/K_M$ MecMUP $p$ -value | $K_i$ PO <sub>4</sub> ( $\mu$ M) | $K_i$ PO <sub>4</sub> $p$ -value |
|---------|-----------------------------------|----------------------------|-----------------------|----------------------------|-------------------------------------------------------|-------------------------------|------------------------------------------------------|------------------------------|---------------------------------------------------------|---------------------------------|----------------------------------|----------------------------------|
| M288G   | 1.3×10 <sup>1</sup>               | 0                          | 6.4×10 <sup>1</sup>   | 3.9×10 <sup>-2</sup>       | 2.0×10 <sup>5</sup>                                   | <b>7.0×10<sup>-4</sup></b>    | 2.3×10 <sup>4</sup>                                  | 0                            | ≤ 1.3                                                   | <b>2.0×10<sup>-4</sup></b>      | 6.1×10 <sup>2</sup>              | 4.9×10 <sup>-1</sup>             |
| M288V   | 4.0×10 <sup>1</sup>               | <b>7.5×10<sup>-3</sup></b> | 8.7×10 <sup>1</sup>   | 8.9×10 <sup>-1</sup>       | 4.7×10 <sup>5</sup>                                   | 2.5×10 <sup>-2</sup>          | -                                                    | -                            | -                                                       | -                               | 5.7×10 <sup>2</sup>              | 3.4×10 <sup>-1</sup>             |
| G289A   | 6.4×10 <sup>1</sup>               | 6.3×10 <sup>-2</sup>       | 6.2×10 <sup>1</sup>   | 9.7×10 <sup>-2</sup>       | 1.1×10 <sup>6</sup>                                   | 5.2×10 <sup>-1</sup>          | 1.8×10 <sup>5</sup>                                  | <b>3.2×10<sup>-3</sup></b>   | 1.2×10 <sup>1</sup>                                     | 2.1×10 <sup>-1</sup>            | 5.9×10 <sup>2</sup>              | 4.7×10 <sup>-1</sup>             |
| V290A   | 1.4×10 <sup>2</sup>               | 2.6×10 <sup>-1</sup>       | 9.8×10 <sup>1</sup>   | 1.9×10 <sup>-1</sup>       | 1.6×10 <sup>6</sup>                                   | 6.0×10 <sup>-1</sup>          | 5.5×10 <sup>5</sup>                                  | 5.8×10 <sup>-1</sup>         | 1.6×10 <sup>1</sup>                                     | 9.9×10 <sup>-1</sup>            | 6.6×10 <sup>2</sup>              | 7.5×10 <sup>-2</sup>             |
| V290G   | 1.1×10 <sup>2</sup>               | 6.0×10 <sup>-1</sup>       | 7.1×10 <sup>1</sup>   | 3.4×10 <sup>-1</sup>       | 1.6×10 <sup>6</sup>                                   | 7.5×10 <sup>-1</sup>          | 1.6×10 <sup>6</sup>                                  | 0                            | 1.4×10 <sup>1</sup>                                     | 4.8×10 <sup>-1</sup>            | 6.3×10 <sup>2</sup>              | 6.7×10 <sup>-1</sup>             |
| D291G   | 1.3×10 <sup>2</sup>               | 6.2×10 <sup>-1</sup>       | 5.9×10 <sup>1</sup>   | 6.6×10 <sup>-2</sup>       | 1.9×10 <sup>6</sup>                                   | 3.2×10 <sup>-1</sup>          | 4.1×10 <sup>5</sup>                                  | 1.5×10 <sup>-1</sup>         | 2.1×10 <sup>1</sup>                                     | 1.4×10 <sup>-1</sup>            | 5.5×10 <sup>2</sup>              | 2.6×10 <sup>-1</sup>             |
| D291V   | 1.3×10 <sup>2</sup>               | 6.3×10 <sup>-1</sup>       | 8.1×10 <sup>1</sup>   | 6.7×10 <sup>-1</sup>       | 1.5×10 <sup>6</sup>                                   | 7.6×10 <sup>-1</sup>          | 6.4×10 <sup>4</sup>                                  | <b>4.8×10<sup>-3</sup></b>   | 7.7                                                     | 1.8×10 <sup>-2</sup>            | 5.8×10 <sup>2</sup>              | 3.4×10 <sup>-1</sup>             |
| D292G   | 1.4×10 <sup>2</sup>               | 4.3×10 <sup>-1</sup>       | 8.6×10 <sup>1</sup>   | 9.5×10 <sup>-1</sup>       | 1.9×10 <sup>6</sup>                                   | 1.5×10 <sup>-1</sup>          | 8.2×10 <sup>5</sup>                                  | 9.3×10 <sup>-2</sup>         | 1.9×10 <sup>1</sup>                                     | 4.3×10 <sup>-1</sup>            | 6.3×10 <sup>2</sup>              | 7.3×10 <sup>-1</sup>             |
| D292V   | 1.0×10 <sup>2</sup>               | 3.3×10 <sup>-1</sup>       | 8.9×10 <sup>1</sup>   | 6.4×10 <sup>-1</sup>       | 1.3×10 <sup>6</sup>                                   | 5.3×10 <sup>-1</sup>          | 3.1×10 <sup>5</sup>                                  | 7.0×10 <sup>-2</sup>         | ≤ 4.9                                                   | 2.7×10 <sup>-2</sup>            | 6.5×10 <sup>2</sup>              | 2.1×10 <sup>-1</sup>             |
| I293G   | 1.1×10 <sup>2</sup>               | 7.6×10 <sup>-1</sup>       | 7.4×10 <sup>1</sup>   | 2.8×10 <sup>-1</sup>       | 1.7×10 <sup>6</sup>                                   | 5.4×10 <sup>-1</sup>          | 4.5×10 <sup>5</sup>                                  | 1.8×10 <sup>-1</sup>         | 1.9×10 <sup>1</sup>                                     | 5.0×10 <sup>-1</sup>            | 6.1×10 <sup>2</sup>              | 7.9×10 <sup>-1</sup>             |
| I293V   | 8.4×10 <sup>1</sup>               | 7.0×10 <sup>-2</sup>       | 8.5×10 <sup>1</sup>   | 9.7×10 <sup>-1</sup>       | 9.0×10 <sup>5</sup>                                   | 1.1×10 <sup>-1</sup>          | 6.0×10 <sup>5</sup>                                  | 9.7×10 <sup>-1</sup>         | 9.8                                                     | 5.4×10 <sup>-2</sup>            | 6.2×10 <sup>2</sup>              | 8.9×10 <sup>-1</sup>             |
| T294G   | 3.8×10 <sup>1</sup>               | 2.0×10 <sup>-2</sup>       | 4.3×10 <sup>1</sup>   | 2.6×10 <sup>-2</sup>       | 6.5×10 <sup>5</sup>                                   | 1.4×10 <sup>-1</sup>          | 1.2×10 <sup>5</sup>                                  | <b>6.2×10<sup>-3</sup></b>   | 6.3                                                     | <b>1.9×10<sup>-3</sup></b>      | 5.3×10 <sup>2</sup>              | 2.4×10 <sup>-2</sup>             |
| T294V   | 1.8×10 <sup>2</sup>               | <b>5.9×10<sup>-3</sup></b> | 9.6×10 <sup>1</sup>   | 2.4×10 <sup>-1</sup>       | 1.8×10 <sup>6</sup>                                   | 1.8×10 <sup>-1</sup>          | 3.8×10 <sup>5</sup>                                  | 1.3×10 <sup>-1</sup>         | 1.9×10 <sup>1</sup>                                     | 4.3×10 <sup>-1</sup>            | 6.8×10 <sup>2</sup>              | 2.9×10 <sup>-2</sup>             |
| D295G   | 3.5×10 <sup>1</sup>               | <b>6.8×10<sup>-3</sup></b> | 5.1×10 <sup>1</sup>   | 1.7×10 <sup>-2</sup>       | 6.6×10 <sup>5</sup>                                   | 7.4×10 <sup>-2</sup>          | 1.7×10 <sup>5</sup>                                  | 1.5×10 <sup>-2</sup>         | 6.3                                                     | <b>2.0×10<sup>-3</sup></b>      | 4.9×10 <sup>2</sup>              | <b>5.3×10<sup>-3</sup></b>       |
| D295V   | 1.1×10 <sup>1</sup>               | 0                          | 6.0×10 <sup>1</sup>   | <b>8.2×10<sup>-3</sup></b> | 1.6×10 <sup>5</sup>                                   | <b>2.0×10<sup>-4</sup></b>    | 1.7×10 <sup>4</sup>                                  | <b>3.0×10<sup>-4</sup></b>   | ≤ 1.3                                                   | 0                               | 5.0×10 <sup>2</sup>              | <b>1.×10<sup>-4</sup></b>        |
| F296G   | 9.7                               | 0                          | 6.1×10 <sup>1</sup>   | 1.2×10 <sup>-2</sup>       | 1.6×10 <sup>5</sup>                                   | <b>1.×10<sup>-4</sup></b>     | 1.8×10 <sup>4</sup>                                  | <b>3.0×10<sup>-4</sup></b>   | 1.5                                                     | <b>8.2×10<sup>-3</sup></b>      | 4.3×10 <sup>2</sup>              | 0                                |
| F296V   | 6.6×10 <sup>1</sup>               | 5.1×10 <sup>-2</sup>       | 7.6×10 <sup>1</sup>   | 4.7×10 <sup>-1</sup>       | 9.8×10 <sup>5</sup>                                   | 3.0×10 <sup>-1</sup>          | 4.4×10 <sup>5</sup>                                  | 1.7×10 <sup>-1</sup>         | ≤ 4.0                                                   | <b>2.3×10<sup>-3</sup></b>      | 4.8×10 <sup>2</sup>              | <b>9.0×10<sup>-4</sup></b>       |
| L297G   | 4.0×10 <sup>-1</sup>              | <b>1.1×10<sup>-3</sup></b> | 4.8×10 <sup>1</sup>   | 1.1×10 <sup>-2</sup>       | 7.6×10 <sup>3</sup>                                   | <b>1.8×10<sup>-3</sup></b>    | ≤ 2.1×10 <sup>3</sup>                                | 0                            | ≤ 1.1                                                   | 0                               | 4.6×10 <sup>2</sup>              | 2.8×10 <sup>-2</sup>             |
| L297V   | 1.7×10 <sup>2</sup>               | 1.9×10 <sup>-2</sup>       | 8.6×10 <sup>1</sup>   | 9.8×10 <sup>-1</sup>       | 1.6×10 <sup>6</sup>                                   | 5.0×10 <sup>-1</sup>          | 3.4×10 <sup>5</sup>                                  | 1.7×10 <sup>-2</sup>         | 1.4×10 <sup>1</sup>                                     | 4.2×10 <sup>-1</sup>            | 6.2×10 <sup>2</sup>              | 7.2×10 <sup>-1</sup>             |
| T298G   | 7.8×10 <sup>1</sup>               | 4.9×10 <sup>-2</sup>       | 6.3×10 <sup>1</sup>   | 3.4×10 <sup>-2</sup>       | 1.2×10 <sup>6</sup>                                   | 4.7×10 <sup>-1</sup>          | 3.2×10 <sup>5</sup>                                  | 3.6×10 <sup>-2</sup>         | 1.2×10 <sup>1</sup>                                     | 2.1×10 <sup>-1</sup>            | 4.9×10 <sup>2</sup>              | <b>6.0×10<sup>-4</sup></b>       |
| T298V   | 1.9×10 <sup>2</sup>               | <b>2.3×10<sup>-3</sup></b> | 7.5×10 <sup>1</sup>   | 2.4×10 <sup>-1</sup>       | 2.6×10 <sup>6</sup>                                   | <b>4.0×10<sup>-4</sup></b>    | 9.6×10 <sup>5</sup>                                  | <b>7.5×10<sup>-3</sup></b>   | 1.9×10 <sup>1</sup>                                     | 5.3×10 <sup>-1</sup>            | 5.8×10 <sup>2</sup>              | 2.8×10 <sup>-1</sup>             |
| V299A   | 8.3×10 <sup>1</sup>               | 1.2×10 <sup>-1</sup>       | 8.1×10 <sup>1</sup>   | 7.1×10 <sup>-1</sup>       | 1.0×10 <sup>6</sup>                                   | 1.9×10 <sup>-1</sup>          | 1.0×10 <sup>5</sup>                                  | <b>5.9×10<sup>-3</sup></b>   | 1.1×10 <sup>1</sup>                                     | 2.6×10 <sup>-1</sup>            | 5.1×10 <sup>2</sup>              | 4.6×10 <sup>-2</sup>             |
| V299G   | 9.3×10 <sup>-1</sup>              | <b>2.0×10<sup>-4</sup></b> | 6.7×10 <sup>1</sup>   | 1.1×10 <sup>-1</sup>       | 1.4×10 <sup>4</sup>                                   | <b>5.0×10<sup>-4</sup></b>    | 1.2×10 <sup>4</sup>                                  | <b>3.3×10<sup>-3</sup></b>   | ≤ 1.3                                                   | <b>1.×10<sup>-4</sup></b>       | 3.9×10 <sup>2</sup>              | 0                                |
| N300G   | 1.3×10 <sup>2</sup>               | 5.7×10 <sup>-1</sup>       | 3.5×10 <sup>1</sup>   | 0                          | 3.5×10 <sup>6</sup>                                   | 0                             | 6.5×10 <sup>5</sup>                                  | 8.3×10 <sup>-1</sup>         | 6.8                                                     | <b>3.6×10<sup>-3</sup></b>      | 2.5×10 <sup>2</sup>              | <b>2.0×10<sup>-4</sup></b>       |
| N300V   | 2.8                               | <b>1.×10<sup>-4</sup></b>  | 1.9×10 <sup>1</sup>   | 0                          | 1.3×10 <sup>5</sup>                                   | <b>2.0×10<sup>-4</sup></b>    | 2.8×10 <sup>3</sup>                                  | <b>9.5×10<sup>-3</sup></b>   | 1.4                                                     | <b>4.0×10<sup>-4</sup></b>      | 5.1×10 <sup>2</sup>              | <b>3.6×10<sup>-3</sup></b>       |
| L301G   | 9.3                               | 0                          | 6.2×10 <sup>1</sup>   | 1.0×10 <sup>-2</sup>       | 1.5×10 <sup>5</sup>                                   | 0                             | 1.5×10 <sup>4</sup>                                  | 0                            | ≤ 1.1                                                   | 0                               | 6.1×10 <sup>2</sup>              | 7.2×10 <sup>-1</sup>             |
| L301V   | 8.0×10 <sup>1</sup>               | 1.4×10 <sup>-1</sup>       | 1.5×10 <sup>2</sup>   | <b>1.×10<sup>-4</sup></b>  | 6.1×10 <sup>5</sup>                                   | 5.7×10 <sup>-2</sup>          | 3.2×10 <sup>5</sup>                                  | 2.8×10 <sup>-2</sup>         | 5.5                                                     | 4.5×10 <sup>-2</sup>            | 7.7×10 <sup>2</sup>              | <b>3.2×10<sup>-3</sup></b>       |
| A302G   | 8.3×10 <sup>1</sup>               | 1.5×10 <sup>-1</sup>       | 5.2×10 <sup>1</sup>   | 1.8×10 <sup>-2</sup>       | 1.7×10 <sup>6</sup>                                   | 5.6×10 <sup>-1</sup>          | 1.1×10 <sup>5</sup>                                  | <b>4.5×10<sup>-3</sup></b>   | 1.1×10 <sup>1</sup>                                     | 1.3×10 <sup>-1</sup>            | 1.0×10 <sup>3</sup>              | <b>4.0×10<sup>-4</sup></b>       |
| A302V   | 2.5×10 <sup>1</sup>               | 0                          | 9.7×10 <sup>1</sup>   | 1.6×10 <sup>-1</sup>       | 2.9×10 <sup>5</sup>                                   | 0                             | 6.4×10 <sup>3</sup>                                  | <b>2.9×10<sup>-3</sup></b>   | 3.6×10 <sup>1</sup>                                     | <b>1.×10<sup>-4</sup></b>       | 7.9×10 <sup>2</sup>              | 0                                |
| S303G   | 1.6×10 <sup>2</sup>               | 1.5×10 <sup>-1</sup>       | 9.3×10 <sup>1</sup>   | 5.7×10 <sup>-1</sup>       | 1.7×10 <sup>6</sup>                                   | 5.4×10 <sup>-1</sup>          | 3.5×10 <sup>5</sup>                                  | 4.3×10 <sup>-2</sup>         | 1.5×10 <sup>1</sup>                                     | 7.7×10 <sup>-1</sup>            | 7.5×10 <sup>2</sup>              | 3.2×10 <sup>-2</sup>             |
| S303V   | 5.2×10 <sup>1</sup>               | <b>1.3×10<sup>-3</sup></b> | 5.8×10 <sup>1</sup>   | <b>5.8×10<sup>-3</sup></b> | 8.9×10 <sup>5</sup>                                   | 8.5×10 <sup>-2</sup>          | 8.1×10 <sup>4</sup>                                  | <b>1.2×10<sup>-3</sup></b>   | 2.9                                                     | <b>6.0×10<sup>-4</sup></b>      | 6.9×10 <sup>2</sup>              | 8.2×10 <sup>-2</sup>             |
| T304G   | 1.6×10 <sup>2</sup>               | 1.3×10 <sup>-1</sup>       | 5.7×10 <sup>1</sup>   | 2.1×10 <sup>-2</sup>       | 2.8×10 <sup>6</sup>                                   | <b>7.0×10<sup>-4</sup></b>    | ≤ 3.2×10 <sup>5</sup>                                | 8.0×10 <sup>-2</sup>         | 1.8×10 <sup>1</sup>                                     | 4.7×10 <sup>-1</sup>            | 4.3×10 <sup>2</sup>              | <b>4.0×10<sup>-4</sup></b>       |
| T304V   | 1.0×10 <sup>1</sup>               | <b>2.0×10<sup>-4</sup></b> | 7.9×10 <sup>1</sup>   | 5.2×10 <sup>-1</sup>       | 1.2×10 <sup>5</sup>                                   | <b>7.0×10<sup>-4</sup></b>    | 1.0×10 <sup>5</sup>                                  | 0                            | ≤ 1.8                                                   | <b>1.×10<sup>-4</sup></b>       | 7.7×10 <sup>2</sup>              | <b>1.×10<sup>-4</sup></b>        |
| D305G   | 7.4×10 <sup>-1</sup>              | 0                          | ≤ 7.1                 | 0                          | ≥ 1.0×10 <sup>5</sup>                                 | <b>1.×10<sup>-4</sup></b>     | ≤ 2.9×10 <sup>3</sup>                                | 0                            | ≤ 1.3                                                   | 0                               | ≤ 2.0                            | <b>4.0×10<sup>-4</sup></b>       |
| D305V   | -                                 | -                          | -                     | -                          | ≤ 2.1×10 <sup>2</sup>                                 | 0                             | ≤ 5.4×10 <sup>2</sup>                                | <b>3.0×10<sup>-4</sup></b>   | ≤ 1.3                                                   | 0                               | -                                | -                                |
| Y306G   | 4.6×10 <sup>1</sup>               | <b>2.6×10<sup>-3</sup></b> | 9.9                   | 0                          | 5.3×10 <sup>6</sup>                                   | 0                             | 8.0×10 <sup>4</sup>                                  | 0                            | 9.5×10 <sup>1</sup>                                     | 0                               | 1.4×10 <sup>2</sup>              | 0                                |
| Y306V   | 5.9×10 <sup>1</sup>               | <b>5.3×10<sup>-3</sup></b> | 6.0×10 <sup>1</sup>   | 1.9×10 <sup>-2</sup>       | 8.7×10 <sup>5</sup>                                   | 9.8×10 <sup>-2</sup>          | 5.7×10 <sup>4</sup>                                  | 0                            | 1.7×10 <sup>1</sup>                                     | 8.4×10 <sup>-1</sup>            | 5.2×10 <sup>2</sup>              | <b>6.6×10<sup>-3</sup></b>       |
| V307A   | 2.2×10 <sup>2</sup>               | <b>1.×10<sup>-4</sup></b>  | 1.1×10 <sup>2</sup>   | 4.2×10 <sup>-2</sup>       | 2.2×10 <sup>6</sup>                                   | 2.8×10 <sup>-2</sup>          | 2.8×10 <sup>5</sup>                                  | <b>6.5×10<sup>-3</sup></b>   | 1.6×10 <sup>1</sup>                                     | 8.8×10 <sup>-1</sup>            | 8.4×10 <sup>2</sup>              | <b>2.0×10<sup>-4</sup></b>       |
| V307G   | 1.1×10 <sup>2</sup>               | 5.9×10 <sup>-1</sup>       | 8.4×10 <sup>1</sup>   | 8.9×10 <sup>-1</sup>       | 2.0×10 <sup>6</sup>                                   | 1.6×10 <sup>-1</sup>          | 1.4×10 <sup>5</sup>                                  | 2.3×10 <sup>-2</sup>         | 9.3                                                     | 4.4×10 <sup>-2</sup>            | 8.3×10 <sup>2</sup>              | <b>8.0×10<sup>-4</sup></b>       |
| G308A   | 4.7×10 <sup>1</sup>               | <b>2.8×10<sup>-3</sup></b> | 8.1×10 <sup>1</sup>   | 6.7×10 <sup>-1</sup>       | 6.4×10 <sup>5</sup>                                   | 3.6×10 <sup>-2</sup>          | 2.8×10 <sup>5</sup>                                  | 1.4×10 <sup>-2</sup>         | 1.2×10 <sup>1</sup>                                     | 3.0×10 <sup>-1</sup>            | 5.1×10 <sup>2</sup>              | <b>1.2×10<sup>-3</sup></b>       |
| G308V   | 1.6×10 <sup>1</sup>               | 0                          | 7.9×10 <sup>1</sup>   | 3.5×10 <sup>-1</sup>       | 2.3×10 <sup>5</sup>                                   | 0                             | 7.4×10 <sup>4</sup>                                  | 0                            | ≤ 1.8                                                   | 0                               | 4.7×10 <sup>2</sup>              | 0                                |
| H309G   | 4.3×10 <sup>1</sup>               | 0                          | 1.2×10 <sup>2</sup>   | <b>3.0×10<sup>-4</sup></b> | 3.2×10 <sup>5</sup>                                   | <b>3.0×10<sup>-4</sup></b>    | 1.0×10 <sup>5</sup>                                  | <b>5.3×10<sup>-3</sup></b>   | ≤ 1.1                                                   | 0                               | 8.3×10 <sup>2</sup>              | 0                                |
| H309V   | 3.0                               | 0                          | 5.8×10 <sup>2</sup>   | 0                          | 5.2×10 <sup>3</sup>                                   | 0                             | ≤ 1.1×10 <sup>3</sup>                                | 0                            | ≤ 1.3                                                   | <b>1.×10<sup>-4</sup></b>       | 9.6×10 <sup>2</sup>              | 0                                |
| N310G   | 9.9×10 <sup>1</sup>               | 3.5×10 <sup>-1</sup>       | 6.7×10 <sup>1</sup>   | 1.3×10 <sup>-1</sup>       | 1.3×10 <sup>6</sup>                                   | 6.8×10 <sup>-1</sup>          | 2.4×10 <sup>5</sup>                                  | <b>8.2×10<sup>-3</sup></b>   | 1.7×10 <sup>1</sup>                                     | 8.9×10 <sup>-1</sup>            | 6.0×10 <sup>2</sup>              | 5.0×10 <sup>-1</sup>             |
| N310V   | 8.0×10 <sup>1</sup>               | 2.7×10 <sup>-2</sup>       | 6.3×10 <sup>1</sup>   | 3.4×10 <sup>-2</sup>       | 1.4×10 <sup>6</sup>                                   | 8.7×10 <sup>-1</sup>          | 4.3×10 <sup>5</sup>                                  | 8.9×10 <sup>-2</sup>         | 9.8                                                     | 1.2×10 <sup>-1</sup>            | 4.7×10 <sup>2</sup>              | <b>2.0×10<sup>-4</sup></b>       |
| F311G   | 3.2×10 <sup>1</sup>               | <b>1.2×10<sup>-3</sup></b> | 6.3×10 <sup>1</sup>   | 6.5×10 <sup>-2</sup>       | 5.2×10 <sup>5</sup>                                   | 1.6×10 <sup>-2</sup>          | 3.0×10 <sup>5</sup>                                  | 1.9×10 <sup>-2</sup>         | 5.4                                                     | <b>6.0×10<sup>-3</sup></b>      | 4.1×10 <sup>2</sup>              | <b>1.×10<sup>-4</sup></b>        |
| F311V   | 6.7×10 <sup>1</sup>               | 2.7×10 <sup>-2</sup>       | 9.1×10 <sup>1</sup>   | 5.3×10 <sup>-1</sup>       | 7.9×10 <sup>5</sup>                                   | 6.9×10 <sup>-2</sup>          | 3.1×10 <sup>5</sup>                                  | 1.1×10 <sup>-2</sup>         | 6.7                                                     | 1.2×10 <sup>-2</sup>            | 5.9×10 <sup>2</sup>              | 3.8×10 <sup>-1</sup>             |
| G312A   | 5.7×10 <sup>1</sup>               | <b>9.5×10<sup>-3</sup></b> | 5.3×10 <sup>1</sup>   | 1.1×10 <sup>-2</sup>       | 1.0×10 <sup>6</sup>                                   | 3.2×10 <sup>-1</sup>          | 3.0×10 <sup>5</sup>                                  | 5.0×10 <sup>-2</sup>         | 1.2×10 <sup>1</sup>                                     | 2.0×10 <sup>-1</sup>            | 5.6×10 <sup>2</sup>              | 6.6×10 <sup>-2</sup>             |
| G312V   | -                                 | -                          | -                     | -                          | ≤ 2.8×10 <sup>4</sup>                                 | 0                             | 1.1×10 <sup>3</sup>                                  | 1.2×10 <sup>-2</sup>         | ≤ 1.3                                                   | <b>9.0×10<sup>-4</sup></b>      | -                                | 8.1×10 <sup>-2</sup>             |
| P313G   | 4.6×10 <sup>1</sup>               | <b>3.4×10<sup>-3</sup></b> | 5.2×10 <sup>1</sup>   | <b>6.6×10<sup>-3</sup></b> | 1.0×10 <sup>6</sup>                                   | 2.8×10 <sup>-1</sup>          | 3.2×10 <sup>5</sup>                                  | 2.3×10 <sup>-2</sup>         | 1.5×10 <sup>1</sup>                                     | 8.1×10 <sup>-1</sup>            | 5.4×10 <sup>2</sup>              | 2.3×10 <sup>-2</sup>             |
| P313V   | 1.7×10 <sup>2</sup>               | 4.5×10 <sup>-2</sup>       | 9.6×10 <sup>1</sup>   | 3.3×10 <sup>-1</sup>       | 1.7×10 <sup>6</sup>                                   | 4.5×10 <sup>-1</sup>          | 7.1×10 <sup>5</sup>                                  | 3.3×10 <sup>-1</sup>         | 1.2×10 <sup>1</sup>                                     | 4.7×10 <sup>-1</sup>            | 6.9×10 <sup>2</sup>              | 4.2×10 <sup>-2</sup>             |
| N314G   | 4.4×10 <sup>1</sup>               | <b>3.0×10<sup>-4</sup></b> | 4.3×10 <sup>1</sup>   | <b>1.×10<sup>-4</sup></b>  | 1.0×10 <sup>6</sup>                                   | 2.6×10 <sup>-1</sup>          | 2.8×10 <sup>5</sup>                                  | 2.0×10 <sup>-2</sup>         | 9.1                                                     | 1.8×10 <sup>-2</sup>            | 4.0×10 <sup>2</sup>              | <b>1.×10<sup>-4</sup></b>        |
| N314V   | 9.9×10 <sup>1</sup>               | 2.5×10 <sup>-1</sup>       | 5.7×10 <sup>1</sup>   | <b>7.0×10<sup>-3</sup></b> | 1.9×10 <sup>6</sup>                                   | 1.4×10 <sup>-1</sup>          | 1.3×10 <sup>5</sup>                                  | <b>1.8×10<sup>-3</sup></b>   | 2.4×10 <sup>1</sup>                                     | 1.5×10 <sup>-2</sup>            | 4.4×10 <sup>2</sup>              | <b>2.0×10<sup>-4</sup></b>       |
| S315G   | 5.0×10 <sup>1</sup>               | <b>1.6×10<sup>-3</sup></b> | 5.8×10 <sup>1</sup>   | 1.3×10 <sup>-2</sup>       | 7.7×10 <sup>5</sup>                                   | 5.2×10 <sup>-2</sup>          | 1.8×10 <sup>5</sup>                                  | 1.1×10 <sup>-2</sup>         | 4.9                                                     | <b>5.0×10<sup>-4</sup></b>      | 4.6×10 <sup>2</sup>              | 0                                |
| S315V   | 1.5×10 <sup>1</sup>               | <b>9.0×10<sup>-4</sup></b> | 3.2×10 <sup>1</sup>   | <b>2.0×10<sup>-4</sup></b> | 4.1×10 <sup>5</sup>                                   | <b>7.7×10<sup>-3</sup></b>    | 1.4×10 <sup>4</sup>                                  | 3.3×10 <sup>-2</sup>         | 2.9                                                     | <b>5.0×10<sup>-4</sup></b>      | 2.1×10 <sup>2</sup>              | 0                                |
| I316G   | 3.6×10 <sup>1</sup>               | <b>7.0×10<sup>-4</sup></b> | 5.0×10 <sup>1</sup>   | <b>4.1×10<sup>-3</sup></b> | 6.6×10 <sup>5</sup>                                   | 4.0×10 <sup>-2</sup>          | 1.6×10 <sup>5</sup>                                  | <b>2.9×10<sup>-3</sup></b>   | ≤ 7.5×10 <sup>-1</sup>                                  | 0                               | 3.7×10 <sup>2</sup>              | <b>1.×10<sup>-4</sup></b>        |
| I316V   | 1.5×10 <sup>2</sup>               | 1.1×10 <sup>-1</sup>       | 9.4×10 <sup>1</sup>   | 4.0×10 <sup>-1</sup>       | 1.7×10 <sup>6</sup>                                   | 3.5×10 <sup>-1</sup>          | 5.0×10 <sup>5</sup>                                  | 3.1×10 <sup>-1</sup>         | 1.2×10 <sup>1</sup>                                     | 3.0×10 <sup>-1</sup>            | 6.6×10 <sup>2</sup>              | 2.1×10 <sup>-1</sup>             |
| E317G   | 9.6                               | 0                          | 3.1×10 <sup>1</sup>   | 0                          | 3.3×10 <sup>5</sup>                                   | <b>3.0×10<sup>-4</sup></b>    | 2.0×10 <sup>4</sup>                                  | 0                            | 2.1                                                     | 0                               | 2.3×10 <sup>2</sup>              | 0                                |
| E317V   | 1.1×10 <sup>1</sup>               | 0                          | 2.5×10 <sup>1</sup>   | 0                          | 5.5×10 <sup>5</sup>                                   |                               |                                                      |                              |                                                         |                                 |                                  |                                  |

| Variant | $k_{cat}$ cMUP (s <sup>-1</sup> ) | $k_{cat}$ cMUP $p$ -value  | $K_M$ cMUP ( $\mu$ M) | $K_M$ cMUP $p$ -value      | $k_{cat}/K_M$ cMUP (M <sup>-1</sup> s <sup>-1</sup> ) | $k_{cat}/K_M$ cMUP $p$ -value | $k_{cat}/K_M$ MeP (M <sup>-1</sup> s <sup>-1</sup> ) | $k_{cat}/K_M$ MeP $p$ -value | $k_{cat}/K_M$ MecMUP (M <sup>-1</sup> s <sup>-1</sup> ) | $k_{cat}/K_M$ MecMUP $p$ -value | $K_i$ PO <sub>4</sub> ( $\mu$ M) | $K_i$ PO <sub>4</sub> $p$ -value |
|---------|-----------------------------------|----------------------------|-----------------------|----------------------------|-------------------------------------------------------|-------------------------------|------------------------------------------------------|------------------------------|---------------------------------------------------------|---------------------------------|----------------------------------|----------------------------------|
| D326G   | 1.1                               | 0                          | 5.7×10 <sup>1</sup>   | 1.0×10 <sup>-2</sup>       | 1.7×10 <sup>4</sup>                                   | <b>1.×10<sup>-4</sup></b>     | ≤ 2.1×10 <sup>3</sup>                                | 0                            | ≤ 1.3                                                   | 0                               | 6.1×10 <sup>2</sup>              | 6.6×10 <sup>-1</sup>             |
| D326V   | -                                 | -                          | -                     | -                          | ≤ 7.0×10 <sup>2</sup>                                 | 0                             | ≤ 6.6×10 <sup>3</sup>                                | 0                            | ≤ 1.3                                                   | 0                               | -                                | -                                |
| R327G   | 1.1×10 <sup>2</sup>               | 6.4×10 <sup>-1</sup>       | 7.4×10 <sup>1</sup>   | 4.1×10 <sup>-1</sup>       | 1.9×10 <sup>6</sup>                                   | 2.5×10 <sup>-1</sup>          | 2.2×10 <sup>5</sup>                                  | <b>5.3×10<sup>-3</sup></b>   | 1.9×10 <sup>1</sup>                                     | 3.8×10 <sup>-1</sup>            | 5.8×10 <sup>2</sup>              | 2.5×10 <sup>-1</sup>             |
| R327V   | 2.3×10 <sup>2</sup>               | 0                          | 9.1×10 <sup>1</sup>   | 5.5×10 <sup>-1</sup>       | 2.1×10 <sup>6</sup>                                   | 2.2×10 <sup>-2</sup>          | 3.2×10 <sup>5</sup>                                  | 2.8×10 <sup>-2</sup>         | 1.9×10 <sup>1</sup>                                     | 5.9×10 <sup>-1</sup>            | 6.6×10 <sup>2</sup>              | 1.8×10 <sup>-1</sup>             |
| D328G   | 6.8×10 <sup>1</sup>               | 1.9×10 <sup>-2</sup>       | 7.2×10 <sup>1</sup>   | 1.9×10 <sup>-1</sup>       | 1.0×10 <sup>6</sup>                                   | 2.3×10 <sup>-1</sup>          | 1.6×10 <sup>5</sup>                                  | <b>2.1×10<sup>-3</sup></b>   | 1.2×10 <sup>1</sup>                                     | 2.1×10 <sup>-1</sup>            | 5.9×10 <sup>2</sup>              | 5.2×10 <sup>-1</sup>             |
| D328V   | 5.2×10 <sup>1</sup>               | <b>5.8×10<sup>-3</sup></b> | 9.8×10 <sup>1</sup>   | 2.5×10 <sup>-1</sup>       | 6.3×10 <sup>5</sup>                                   | 3.3×10 <sup>-2</sup>          | 1.4×10 <sup>5</sup>                                  | <b>1.5×10<sup>-3</sup></b>   | 1.0×10 <sup>1</sup>                                     | 1.9×10 <sup>-1</sup>            | 6.2×10 <sup>2</sup>              | 7.6×10 <sup>-1</sup>             |
| L329G   | 9.9×10 <sup>-2</sup>              | 1.5×10 <sup>-2</sup>       | 3.5×10 <sup>1</sup>   | <b>7.3×10<sup>-3</sup></b> | 2.8×10 <sup>3</sup>                                   | 1.2×10 <sup>-2</sup>          | ≤ 2.0×10 <sup>3</sup>                                | 0                            | ≤ 1.1                                                   | 0                               | -                                | -                                |
| L329V   | 1.3×10 <sup>2</sup>               | 4.3×10 <sup>-1</sup>       | 8.4×10 <sup>1</sup>   | 9.0×10 <sup>-1</sup>       | 1.6×10 <sup>6</sup>                                   | 4.7×10 <sup>-1</sup>          | 3.6×10 <sup>5</sup>                                  | 2.4×10 <sup>-2</sup>         | 1.5×10 <sup>1</sup>                                     | 7.5×10 <sup>-1</sup>            | 6.3×10 <sup>2</sup>              | 5.8×10 <sup>-1</sup>             |
| A330G   | 1.9×10 <sup>2</sup>               | <b>8.9×10<sup>-3</sup></b> | 7.9×10 <sup>1</sup>   | 5.6×10 <sup>-1</sup>       | 2.3×10 <sup>6</sup>                                   | 1.5×10 <sup>-2</sup>          | 4.3×10 <sup>5</sup>                                  | 1.5×10 <sup>-1</sup>         | 1.5×10 <sup>1</sup>                                     | 8.0×10 <sup>-1</sup>            | 5.5×10 <sup>2</sup>              | 4.9×10 <sup>-2</sup>             |
| A330V   | 1.7×10 <sup>2</sup>               | 3.6×10 <sup>-2</sup>       | 9.8×10 <sup>1</sup>   | 2.0×10 <sup>-1</sup>       | 1.7×10 <sup>6</sup>                                   | 5.0×10 <sup>-1</sup>          | 3.0×10 <sup>5</sup>                                  | <b>6.6×10<sup>-3</sup></b>   | 1.2×10 <sup>1</sup>                                     | 3.8×10 <sup>-1</sup>            | 6.7×10 <sup>2</sup>              | 1.4×10 <sup>-1</sup>             |
| D331G   | 1.1×10 <sup>2</sup>               | 7.5×10 <sup>-1</sup>       | 7.3×10 <sup>1</sup>   | 3.5×10 <sup>-1</sup>       | 1.5×10 <sup>6</sup>                                   | 7.9×10 <sup>-1</sup>          | 2.9×10 <sup>5</sup>                                  | 1.8×10 <sup>-2</sup>         | 1.8×10 <sup>1</sup>                                     | 6.5×10 <sup>-1</sup>            | 5.9×10 <sup>2</sup>              | 6.0×10 <sup>-1</sup>             |
| D331V   | 9.1×10 <sup>1</sup>               | 1.8×10 <sup>-1</sup>       | 9.0×10 <sup>1</sup>   | 7.0×10 <sup>-1</sup>       | 9.2×10 <sup>5</sup>                                   | 1.4×10 <sup>-1</sup>          | 5.3×10 <sup>5</sup>                                  | 5.7×10 <sup>-1</sup>         | 1.0×10 <sup>1</sup>                                     | 8.0×10 <sup>-2</sup>            | 6.0×10 <sup>2</sup>              | 5.9×10 <sup>-1</sup>             |
| F332G   | 4.7×10 <sup>-1</sup>              | <b>1.×10<sup>-4</sup></b>  | 6.4×10 <sup>1</sup>   | 3.8×10 <sup>-2</sup>       | 7.5×10 <sup>3</sup>                                   | <b>1.×10<sup>-4</sup></b>     | ≤ 5.3×10 <sup>3</sup>                                | 0                            | ≤ 9.9×10 <sup>-1</sup>                                  | 0                               | 5.7×10 <sup>2</sup>              | 1.1×10 <sup>-1</sup>             |
| F332V   | 9.9×10 <sup>1</sup>               | 4.6×10 <sup>-1</sup>       | 8.1×10 <sup>1</sup>   | 7.6×10 <sup>-1</sup>       | 1.5×10 <sup>6</sup>                                   | 8.1×10 <sup>-1</sup>          | 6.1×10 <sup>4</sup>                                  | 0                            | 9.3                                                     | 1.3×10 <sup>-1</sup>            | 5.5×10 <sup>2</sup>              | 1.0×10 <sup>-1</sup>             |
| F333G   | 4.7                               | <b>4.0×10<sup>-4</sup></b> | 7.3×10 <sup>1</sup>   | 2.8×10 <sup>-1</sup>       | 6.5×10 <sup>4</sup>                                   | <b>6.0×10<sup>-4</sup></b>    | ≤ 6.2×10 <sup>3</sup>                                | 0                            | ≤ 1.1                                                   | 0                               | 4.5×10 <sup>2</sup>              | 0                                |
| F333V   | 1.7×10 <sup>2</sup>               | 4.6×10 <sup>-2</sup>       | 9.7×10 <sup>1</sup>   | 3.1×10 <sup>-1</sup>       | 1.9×10 <sup>6</sup>                                   | 2.1×10 <sup>-1</sup>          | 9.6×10 <sup>4</sup>                                  | <b>1.8×10<sup>-3</sup></b>   | 9.9                                                     | 5.6×10 <sup>-2</sup>            | 6.3×10 <sup>2</sup>              | 5.7×10 <sup>-1</sup>             |
| N334G   | 1.0×10 <sup>2</sup>               | 2.1×10 <sup>-1</sup>       | 6.7×10 <sup>1</sup>   | 5.3×10 <sup>-2</sup>       | 1.2×10 <sup>6</sup>                                   | 5.3×10 <sup>-1</sup>          | 4.8×10 <sup>5</sup>                                  | 2.8×10 <sup>-1</sup>         | 1.7×10 <sup>1</sup>                                     | 7.0×10 <sup>-1</sup>            | 5.2×10 <sup>2</sup>              | <b>7.3×10<sup>-3</sup></b>       |
| N334V   | 1.4×10 <sup>2</sup>               | 4.1×10 <sup>-1</sup>       | 1.0×10 <sup>2</sup>   | 1.0×10 <sup>-1</sup>       | 1.4×10 <sup>6</sup>                                   | 7.8×10 <sup>-1</sup>          | 8.4×10 <sup>5</sup>                                  | 7.2×10 <sup>-2</sup>         | 1.1×10 <sup>1</sup>                                     | 1.3×10 <sup>-1</sup>            | 6.3×10 <sup>2</sup>              | 6.2×10 <sup>-1</sup>             |
| N335G   | 8.7×10 <sup>1</sup>               | 1.3×10 <sup>-1</sup>       | 7.1×10 <sup>1</sup>   | 2.3×10 <sup>-1</sup>       | 1.5×10 <sup>6</sup>                                   | 8.8×10 <sup>-1</sup>          | 6.1×10 <sup>5</sup>                                  | 9.4×10 <sup>-1</sup>         | 1.8×10 <sup>1</sup>                                     | 4.7×10 <sup>-1</sup>            | 6.1×10 <sup>2</sup>              | 9.2×10 <sup>-1</sup>             |
| N335V   | 2.0×10 <sup>2</sup>               | <b>2.0×10<sup>-4</sup></b> | 9.7×10 <sup>1</sup>   | 2.2×10 <sup>-1</sup>       | 2.1×10 <sup>6</sup>                                   | 3.3×10 <sup>-2</sup>          | 6.0×10 <sup>5</sup>                                  | 9.2×10 <sup>-1</sup>         | 1.6×10 <sup>1</sup>                                     | 9.3×10 <sup>-1</sup>            | 6.8×10 <sup>2</sup>              | 7.4×10 <sup>-2</sup>             |
| L336G   | 2.4×10 <sup>-1</sup>              | 0                          | 4.0×10 <sup>1</sup>   | <b>5.0×10<sup>-4</sup></b> | 4.6×10 <sup>3</sup>                                   | <b>5.0×10<sup>-4</sup></b>    | ≤ 2.3×10 <sup>3</sup>                                | 0                            | ≤ 1.1                                                   | 0                               | 6.7×10 <sup>2</sup>              | 4.5×10 <sup>-1</sup>             |
| L336V   | 9.5×10 <sup>1</sup>               | 2.9×10 <sup>-1</sup>       | 8.5×10 <sup>1</sup>   | 9.8×10 <sup>-1</sup>       | 7.8×10 <sup>5</sup>                                   | 1.4×10 <sup>-1</sup>          | 4.6×10 <sup>5</sup>                                  | 1.4×10 <sup>-1</sup>         | 1.1×10 <sup>1</sup>                                     | 2.4×10 <sup>-1</sup>            | 5.6×10 <sup>2</sup>              | 1.4×10 <sup>-1</sup>             |
| D337G   | 1.0×10 <sup>1</sup>               | 0                          | 7.4×10 <sup>1</sup>   | 1.6×10 <sup>-1</sup>       | 1.4×10 <sup>5</sup>                                   | 0                             | 2.3×10 <sup>4</sup>                                  | 0                            | ≤ 1.3                                                   | 0                               | 5.8×10 <sup>2</sup>              | 2.0×10 <sup>-1</sup>             |
| D337V   | 2.1×10 <sup>1</sup>               | <b>6.0×10<sup>-4</sup></b> | 8.0×10 <sup>1</sup>   | 6.6×10 <sup>-1</sup>       | 2.5×10 <sup>5</sup>                                   | <b>4.8×10<sup>-3</sup></b>    | 9.8×10 <sup>3</sup>                                  | 0                            | ≤ 5.3×10 <sup>-1</sup>                                  | <b>8.0×10<sup>-4</sup></b>      | 4.5×10 <sup>2</sup>              | <b>8.0×10<sup>-4</sup></b>       |
| K338G   | 7.9×10 <sup>1</sup>               | 4.7×10 <sup>-2</sup>       | 6.9×10 <sup>1</sup>   | 1.0×10 <sup>-1</sup>       | 1.3×10 <sup>6</sup>                                   | 7.3×10 <sup>-1</sup>          | 2.2×10 <sup>5</sup>                                  | 2.3×10 <sup>-2</sup>         | 1.5×10 <sup>1</sup>                                     | 7.0×10 <sup>-1</sup>            | 5.7×10 <sup>2</sup>              | 9.0×10 <sup>-2</sup>             |
| K338V   | 2.2×10 <sup>2</sup>               | <b>7.0×10<sup>-4</sup></b> | 9.8×10 <sup>1</sup>   | 2.8×10 <sup>-1</sup>       | 1.8×10 <sup>6</sup>                                   | 2.6×10 <sup>-1</sup>          | 3.6×10 <sup>5</sup>                                  | 3.3×10 <sup>-2</sup>         | 1.8×10 <sup>1</sup>                                     | 7.3×10 <sup>-1</sup>            | 6.5×10 <sup>2</sup>              | 2.6×10 <sup>-1</sup>             |
| K339G   | 5.3×10 <sup>1</sup>               | 2.4×10 <sup>-2</sup>       | 5.4×10 <sup>1</sup>   | 4.1×10 <sup>-2</sup>       | 9.5×10 <sup>5</sup>                                   | 2.7×10 <sup>-1</sup>          | 2.2×10 <sup>5</sup>                                  | <b>7.7×10<sup>-3</sup></b>   | 8.5                                                     | 1.1×10 <sup>-2</sup>            | 5.1×10 <sup>2</sup>              | <b>7.2×10<sup>-3</sup></b>       |
| K339V   | 9.6×10 <sup>1</sup>               | 2.2×10 <sup>-1</sup>       | 8.0×10 <sup>1</sup>   | 6.5×10 <sup>-1</sup>       | 1.1×10 <sup>6</sup>                                   | 4.1×10 <sup>-1</sup>          | 3.9×10 <sup>5</sup>                                  | 6.8×10 <sup>-2</sup>         | 1.1×10 <sup>1</sup>                                     | 1.9×10 <sup>-1</sup>            | 5.9×10 <sup>2</sup>              | 3.9×10 <sup>-1</sup>             |
| V340A   | 1.7×10 <sup>2</sup>               | 5.8×10 <sup>-2</sup>       | 8.2×10 <sup>1</sup>   | 7.5×10 <sup>-1</sup>       | 1.8×10 <sup>6</sup>                                   | 2.7×10 <sup>-1</sup>          | 1.1×10 <sup>5</sup>                                  | <b>5.7×10<sup>-3</sup></b>   | 1.5×10 <sup>1</sup>                                     | 7.9×10 <sup>-1</sup>            | 5.5×10 <sup>2</sup>              | 1.3×10 <sup>-1</sup>             |
| V340G   | 1.1×10 <sup>1</sup>               | 0                          | 9.0×10 <sup>1</sup>   | 6.9×10 <sup>-1</sup>       | 1.2×10 <sup>5</sup>                                   | <b>3.0×10<sup>-4</sup></b>    | 2.1×10 <sup>4</sup>                                  | <b>1.×10<sup>-4</sup></b>    | ≤ 1.3                                                   | 0                               | 7.5×10 <sup>2</sup>              | 0                                |
| G341A   | 3.7×10 <sup>1</sup>               | <b>7.0×10<sup>-4</sup></b> | 5.9×10 <sup>1</sup>   | 3.3×10 <sup>-2</sup>       | 6.2×10 <sup>5</sup>                                   | 3.2×10 <sup>-2</sup>          | 2.4×10 <sup>5</sup>                                  | <b>9.1×10<sup>-3</sup></b>   | 5.3                                                     | <b>7.0×10<sup>-4</sup></b>      | 5.8×10 <sup>2</sup>              | 3.0×10 <sup>-1</sup>             |
| G341V   | 8.5×10 <sup>1</sup>               | 7.6×10 <sup>-2</sup>       | 8.6×10 <sup>1</sup>   | 9.6×10 <sup>-1</sup>       | 1.0×10 <sup>6</sup>                                   | 2.1×10 <sup>-1</sup>          | 4.6×10 <sup>4</sup>                                  | 0                            | 5.6                                                     | <b>9.0×10<sup>-4</sup></b>      | 6.1×10 <sup>2</sup>              | 8.7×10 <sup>-1</sup>             |
| K342G   | 7.9×10 <sup>1</sup>               | 1.4×10 <sup>-1</sup>       | 6.9×10 <sup>1</sup>   | 2.4×10 <sup>-1</sup>       | 1.4×10 <sup>6</sup>                                   | 9.9×10 <sup>-1</sup>          | 3.3×10 <sup>5</sup>                                  | 3.7×10 <sup>-2</sup>         | 1.3×10 <sup>1</sup>                                     | 3.7×10 <sup>-1</sup>            | 5.4×10 <sup>2</sup>              | 1.1×10 <sup>-1</sup>             |
| K342V   | 1.7×10 <sup>2</sup>               | 1.1×10 <sup>-2</sup>       | 8.6×10 <sup>1</sup>   | 9.4×10 <sup>-1</sup>       | 1.9×10 <sup>6</sup>                                   | 8.7×10 <sup>-2</sup>          | 4.8×10 <sup>5</sup>                                  | 2.2×10 <sup>-1</sup>         | 1.7×10 <sup>1</sup>                                     | 8.5×10 <sup>-1</sup>            | 6.6×10 <sup>2</sup>              | 1.9×10 <sup>-1</sup>             |
| G343A   | 1.2×10 <sup>2</sup>               | 8.7×10 <sup>-1</sup>       | 7.4×10 <sup>1</sup>   | 4.6×10 <sup>-1</sup>       | 1.9×10 <sup>6</sup>                                   | 2.5×10 <sup>-1</sup>          | 8.6×10 <sup>5</sup>                                  | 1.0×10 <sup>-1</sup>         | 1.8×10 <sup>1</sup>                                     | 6.4×10 <sup>-1</sup>            | 6.1×10 <sup>2</sup>              | 9.8×10 <sup>-1</sup>             |
| G343V   | 1.9×10 <sup>2</sup>               | <b>4.9×10<sup>-3</sup></b> | 8.1×10 <sup>1</sup>   | 6.3×10 <sup>-1</sup>       | 2.0×10 <sup>6</sup>                                   | 1.1×10 <sup>-1</sup>          | 2.1×10 <sup>5</sup>                                  | <b>4.4×10<sup>-3</sup></b>   | 1.4×10 <sup>1</sup>                                     | 5.5×10 <sup>-1</sup>            | 6.3×10 <sup>2</sup>              | 6.8×10 <sup>-1</sup>             |
| N344G   | 7.5×10 <sup>1</sup>               | 5.6×10 <sup>-2</sup>       | 5.9×10 <sup>1</sup>   | 3.6×10 <sup>-2</sup>       | 1.3×10 <sup>6</sup>                                   | 7.8×10 <sup>-1</sup>          | 3.1×10 <sup>5</sup>                                  | 2.7×10 <sup>-2</sup>         | 1.2×10 <sup>1</sup>                                     | 1.3×10 <sup>-1</sup>            | 5.1×10 <sup>2</sup>              | 1.2×10 <sup>-2</sup>             |
| N344V   | 2.8×10 <sup>1</sup>               | <b>3.7×10<sup>-3</sup></b> | 8.0×10 <sup>1</sup>   | 6.9×10 <sup>-1</sup>       | 3.5×10 <sup>5</sup>                                   | 1.2×10 <sup>-2</sup>          | 1.7×10 <sup>5</sup>                                  | <b>5.0×10<sup>-4</sup></b>   | ≤ 1.9                                                   | <b>1.×10<sup>-4</sup></b>       | 5.3×10 <sup>2</sup>              | 2.0×10 <sup>-2</sup>             |
| Y345G   | 5.6                               | 0                          | 6.7×10 <sup>1</sup>   | 9.6×10 <sup>-2</sup>       | 8.8×10 <sup>4</sup>                                   | 0                             | 3.0×10 <sup>4</sup>                                  | <b>3.9×10<sup>-3</sup></b>   | ≤ 1.3                                                   | 0                               | 5.1×10 <sup>2</sup>              | <b>8.0×10<sup>-4</sup></b>       |
| Y345V   | 1.4×10 <sup>2</sup>               | 3.3×10 <sup>-1</sup>       | 1.0×10 <sup>2</sup>   | 1.1×10 <sup>-1</sup>       | 1.4×10 <sup>6</sup>                                   | 9.4×10 <sup>-1</sup>          | 2.4×10 <sup>5</sup>                                  | <b>1.9×10<sup>-3</sup></b>   | 1.3×10 <sup>1</sup>                                     | 4.3×10 <sup>-1</sup>            | 6.6×10 <sup>2</sup>              | 1.8×10 <sup>-1</sup>             |
| L346G   | 3.3×10 <sup>1</sup>               | <b>7.0×10<sup>-4</sup></b> | 6.1×10 <sup>1</sup>   | 4.7×10 <sup>-2</sup>       | 4.7×10 <sup>5</sup>                                   | <b>8.0×10<sup>-3</sup></b>    | 1.2×10 <sup>5</sup>                                  | 3.0×10 <sup>-2</sup>         | 5.1                                                     | <b>3.0×10<sup>-4</sup></b>      | 4.9×10 <sup>2</sup>              | <b>2.6×10<sup>-3</sup></b>       |
| L346V   | 1.8×10 <sup>2</sup>               | <b>5.4×10<sup>-3</sup></b> | 8.5×10 <sup>1</sup>   | 1.0                        | 1.9×10 <sup>6</sup>                                   | 1.1×10 <sup>-1</sup>          | 5.2×10 <sup>5</sup>                                  | 4.5×10 <sup>-1</sup>         | 1.7×10 <sup>1</sup>                                     | 9.0×10 <sup>-1</sup>            | 6.3×10 <sup>2</sup>              | 4.0×10 <sup>-1</sup>             |
| V347A   | 2.0×10 <sup>2</sup>               | <b>9.0×10<sup>-4</sup></b> | 9.2×10 <sup>1</sup>   | 5.4×10 <sup>-1</sup>       | 2.2×10 <sup>6</sup>                                   | 2.6×10 <sup>-2</sup>          | 6.7×10 <sup>5</sup>                                  | 5.9×10 <sup>-1</sup>         | 1.3×10 <sup>1</sup>                                     | 4.2×10 <sup>-1</sup>            | 6.3×10 <sup>2</sup>              | 6.0×10 <sup>-1</sup>             |
| V347G   | 8.8×10 <sup>1</sup>               | 1.3×10 <sup>-1</sup>       | 6.6×10 <sup>1</sup>   | 1.4×10 <sup>-1</sup>       | 1.2×10 <sup>6</sup>                                   | 5.5×10 <sup>-1</sup>          | ≤ 8.5×10 <sup>4</sup>                                | <b>1.4×10<sup>-3</sup></b>   | 5.3                                                     | <b>3.0×10<sup>-4</sup></b>      | 5.4×10 <sup>2</sup>              | 2.8×10 <sup>-2</sup>             |
| F348G   | 8.2                               | 0                          | 7.7×10 <sup>1</sup>   | 3.2×10 <sup>-1</sup>       | 1.4×10 <sup>5</sup>                                   | 0                             | 2.8×10 <sup>4</sup>                                  | 0                            | ≤ 1.1                                                   | 0                               | 5.8×10 <sup>2</sup>              | 1.8×10 <sup>-1</sup>             |
| F348V   | 5.7×10 <sup>1</sup>               | <b>5.1×10<sup>-3</sup></b> | 8.7×10 <sup>1</sup>   | 8.4×10 <sup>-1</sup>       | 6.8×10 <sup>5</sup>                                   | 2.6×10 <sup>-2</sup>          | 2.2×10 <sup>5</sup>                                  | <b>2.0×10<sup>-3</sup></b>   | 3.9                                                     | <b>7.0×10<sup>-4</sup></b>      | 6.1×10 <sup>2</sup>              | 9.7×10 <sup>-1</sup>             |
| L349G   | 9.4                               | 0                          | 8.8×10 <sup>1</sup>   | 7.2×10 <sup>-1</sup>       | 1.1×10 <sup>5</sup>                                   | 0                             | 1.9×10 <sup>4</sup>                                  | 0                            | ≤ 9.9×10 <sup>-1</sup>                                  | <b>1.×10<sup>-4</sup></b>       | 7.5×10 <sup>2</sup>              | <b>1.×10<sup>-4</sup></b>        |
| L349V   | 6.5×10 <sup>1</sup>               | <b>6.4×10<sup>-3</sup></b> | 8.3×10 <sup>1</sup>   | 8.2×10 <sup>-1</sup>       | 6.7×10 <sup>5</sup>                                   | 1.7×10 <sup>-2</sup>          | 2.6×10 <sup>5</sup>                                  | <b>9.8×10<sup>-3</sup></b>   | ≤ 1.9                                                   | <b>2.9×10<sup>-3</sup></b>      | 5.3×10 <sup>2</sup>              | <b>7.6×10<sup>-3</sup></b>       |
| S350G   | 4.3×10 <sup>1</sup>               | <b>3.0×10<sup>-4</sup></b> | 8.3×10 <sup>1</sup>   | 8.1×10 <sup>-1</sup>       | 5.1×10 <sup>5</sup>                                   | <b>6.1×10<sup>-3</sup></b>    | 1.6×10 <sup>5</sup>                                  | 1.7×10 <sup>-2</sup>         | 6.5                                                     | <b>5.0×10<sup>-4</sup></b>      | 7.6×10 <sup>2</sup>              | <b>1.×10<sup>-4</sup></b>        |
| S350V   | 8.9×10 <sup>1</sup>               | 7.7×10 <sup>-2</sup>       | 1.1×10 <sup>2</sup>   | <b>5.0×10<sup>-3</sup></b> | 8.9×10 <sup>5</sup>                                   | 8.1×10 <sup>-2</sup>          | 1.6×10 <sup>5</sup>                                  | <b>8.0×10<sup>-4</sup></b>   | 3.9                                                     | <b>2.6×10<sup>-3</sup></b>      | 7.7×10 <sup>2</sup>              | <b>9.0×10<sup>-4</sup></b>       |
| A351G   | 8.9×10 <sup>1</sup>               | 2.2×10 <sup>-1</sup>       | 7.9×10 <sup>1</sup>   | 6.1×10 <sup>-1</sup>       | 1.1×10 <sup>6</sup>                                   | 3.5×10 <sup>-1</sup>          | 1.6×10 <sup>5</sup>                                  | 1.5×10 <sup>-2</sup>         | ≤ 8.4×10 <sup>-1</sup>                                  | 0                               | 4.1×10 <sup>2</sup>              | <b>1.×10<sup>-4</sup></b>        |
| A351V   | 5.4×10 <sup>1</sup>               | <b>2.4×10<sup>-3</sup></b> | 6.0×10 <sup>1</sup>   | <b>9.7×10<sup>-3</sup></b> | 1.0×10 <sup>6</sup>                                   | 1.4×10 <sup>-1</sup>          | 4.6×10 <sup>4</sup>                                  | 0                            | ≤ 1.6                                                   | <b>1.×10<sup>-4</sup></b>       | 4.6×10 <sup>2</sup>              | <b>1.×10<sup>-4</sup></b>        |
| D352G   | 4.0                               | 0                          | 4.6×10 <sup>1</sup>   | <b>3.0×10<sup>-4</sup></b> | 1.2×10 <sup>5</sup>                                   | 0                             | 5.1×10 <sup>5</sup>                                  | 4.5×10 <sup>-1</sup>         | 2.2×10 <sup>1</sup>                                     | 7.6×10 <sup>-2</sup>            | 2.3×10 <sup>1</sup>              | 0                                |
| D352V   | -                                 | -                          | -                     | -                          | ≤ 4.6×10 <sup>2</sup>                                 | 0                             | ≤ 1.2×10 <sup>3</sup>                                | 0                            | ≤ 9.2×10 <sup>-2</sup>                                  | 0                               | -                                | -                                |
| H353G   | -                                 | -                          | -                     | -                          | ≤ 1.1×10 <sup>3</sup>                                 | 0                             | ≤ 1.9×10 <sup>3</sup>                                | 0                            | 3.6×10 <sup>-1</sup>                                    | <b>3.9×10<sup>-3</sup></b>      | -                                | -                                |
| H353V   | 5.0×10 <sup>1</sup>               | <b>2.2×10<sup>-3</sup></b> | 6.3×10 <sup>1</sup>   | 3.3×10 <sup>-2</sup>       | 9.3×10 <sup>5</sup>                                   | 1.3×10 <sup>-1</sup>          | 8.0×10 <sup>4</sup>                                  | <b>1.1×10<sup>-3</sup></b>   | 2.2                                                     | <b>5.0×10<sup>-4</sup></b>      | 5.0×10 <sup>2</sup>              | <b>6.9×10<sup>-3</sup></b>       |
| G354A   | 1.6×10 <sup>1</sup>               | <b>1.×10<sup>-4</sup></b>  | 4.4×10 <sup>1</sup>   | <b>1.5×10<sup>-3</sup></b> | 3.4×10 <sup>5</sup>                                   | <b>4.2×10<sup>-3</sup></b>    | 1.1×10 <sup>5</sup>                                  | 2.9×10 <sup>-2</sup>         | 1.3×10 <sup>1</sup>                                     | 4.5×10 <sup>-1</sup>            | 5.9×10 <sup>2</sup>              | 4.6×10 <sup>-1</sup>             |
| G354V   | -                                 | -                          | -                     | -                          | ≤ 1.3×10 <sup>3</sup>                                 | 0                             | ≤ 1.0×10 <sup>3</sup>                                | 0                            | ≤ 1.3                                                   | 0                               | -                                | -                                |
| A355G   | 1.3×10 <sup>2</sup>               | 6.2×10 <sup>-1</sup>       | 6.7×10 <sup>1</sup>   | 1.3×10 <sup>-1</sup>       | 1.9×10 <sup>6</sup>                                   | 2.3×10 <sup>-1</sup>          | 4.5×10 <sup>5</sup>                                  |                              |                                                         |                                 |                                  |                                  |

| Variant | $k_{cat}$ cMUP (s <sup>-1</sup> ) | $k_{cat}$ cMUP $p$ -value  | $K_M$ cMUP ( $\mu$ M) | $K_M$ cMUP $p$ -value      | $k_{cat}/K_M$ cMUP (M <sup>-1</sup> s <sup>-1</sup> ) | $k_{cat}/K_M$ cMUP $p$ -value | $k_{cat}/K_M$ MeP (M <sup>-1</sup> s <sup>-1</sup> ) | $k_{cat}/K_M$ MeP $p$ -value | $k_{cat}/K_M$ MecMUP (M <sup>-1</sup> s <sup>-1</sup> ) | $k_{cat}/K_M$ MecMUP $p$ -value | $K_i$ PO <sub>4</sub> ( $\mu$ M) | $K_i$ PO <sub>4</sub> $p$ -value |
|---------|-----------------------------------|----------------------------|-----------------------|----------------------------|-------------------------------------------------------|-------------------------------|------------------------------------------------------|------------------------------|---------------------------------------------------------|---------------------------------|----------------------------------|----------------------------------|
| Q363V   | 1.7×10 <sup>2</sup>               | 2.3×10 <sup>-2</sup>       | 8.8×10 <sup>1</sup>   | 7.1×10 <sup>-1</sup>       | 2.2×10 <sup>6</sup>                                   | 1.1×10 <sup>-2</sup>          | 8.8×10 <sup>1</sup>                                  | 3.2×10 <sup>5</sup>          | 1.1×10 <sup>-2</sup>                                    | 1.8×10 <sup>1</sup>             | 6.7×10 <sup>-1</sup>             | 4.0×10 <sup>-1</sup>             |
| A364V   | 1.6×10 <sup>2</sup>               | 5.2×10 <sup>-2</sup>       | 9.3×10 <sup>1</sup>   | 3.8×10 <sup>-1</sup>       | 1.6×10 <sup>6</sup>                                   | 4.7×10 <sup>-1</sup>          | 2.1×10 <sup>5</sup>                                  | <b>1.8×10<sup>-3</sup></b>   | 1.5×10 <sup>1</sup>                                     | 9.1×10 <sup>-1</sup>            | 6.8×10 <sup>2</sup>              | 4.9×10 <sup>-2</sup>             |
| H365G   | 3.8×10 <sup>1</sup>               | <b>5.0×10<sup>-4</sup></b> | 7.1×10 <sup>1</sup>   | 1.6×10 <sup>-1</sup>       | 5.4×10 <sup>5</sup>                                   | <b>9.0×10<sup>-3</sup></b>    | 2.9×10 <sup>5</sup>                                  | 1.6×10 <sup>-2</sup>         | 5.6                                                     | <b>3.0×10<sup>-4</sup></b>      | 5.8×10 <sup>2</sup>              | 3.1×10 <sup>-1</sup>             |
| H365V   | 1.2×10 <sup>2</sup>               | 8.7×10 <sup>-1</sup>       | 8.6×10 <sup>1</sup>   | 9.8×10 <sup>-1</sup>       | 1.3×10 <sup>6</sup>                                   | 7.2×10 <sup>-1</sup>          | 2.1×10 <sup>5</sup>                                  | <b>4.2×10<sup>-3</sup></b>   | 1.6×10 <sup>1</sup>                                     | 9.2×10 <sup>-1</sup>            | 6.4×10 <sup>2</sup>              | 2.5×10 <sup>-1</sup>             |
| K366G   | 3.2×10 <sup>1</sup>               | <b>5.0×10<sup>-4</sup></b> | 4.9×10 <sup>1</sup>   | <b>4.8×10<sup>-3</sup></b> | 5.4×10 <sup>5</sup>                                   | 1.7×10 <sup>-2</sup>          | ≤ 2.3×10 <sup>5</sup>                                | 1.7×10 <sup>-2</sup>         | 8.6                                                     | 2.1×10 <sup>-2</sup>            | 5.0×10 <sup>2</sup>              | <b>6.0×10<sup>-4</sup></b>       |
| K366V   | 5.7×10 <sup>1</sup>               | <b>5.9×10<sup>-3</sup></b> | 9.8×10 <sup>1</sup>   | 2.1×10 <sup>-1</sup>       | 5.9×10 <sup>5</sup>                                   | 1.3×10 <sup>-2</sup>          | 2.3×10 <sup>4</sup>                                  | <b>0</b>                     | 5.1                                                     | <b>4.4×10<sup>-3</sup></b>      | 6.4×10 <sup>2</sup>              | 3.2×10 <sup>-1</sup>             |
| M367G   | 6.6                               | <b>0</b>                   | 4.9×10 <sup>1</sup>   | <b>3.0×10<sup>-4</sup></b> | 1.4×10 <sup>5</sup>                                   | <b>0</b>                      | 3.7×10 <sup>4</sup>                                  | <b>1.×10<sup>-4</sup></b>    | 1.9                                                     | <b>2.0×10<sup>-4</sup></b>      | 3.6×10 <sup>2</sup>              | <b>0</b>                         |
| M367V   | 6.4×10 <sup>1</sup>               | 1.7×10 <sup>-2</sup>       | 8.3×10 <sup>1</sup>   | 7.8×10 <sup>-1</sup>       | 6.8×10 <sup>5</sup>                                   | 3.7×10 <sup>-2</sup>          | 9.6×10 <sup>4</sup>                                  | <b>1.×10<sup>-4</sup></b>    | 6.4                                                     | <b>9.5×10<sup>-3</sup></b>      | 6.8×10 <sup>2</sup>              | 4.0×10 <sup>-2</sup>             |
| P368G   | 2.1×10 <sup>1</sup>               | <b>0</b>                   | 6.0×10 <sup>1</sup>   | 1.8×10 <sup>-2</sup>       | 3.4×10 <sup>5</sup>                                   | <b>1.3×10<sup>-3</sup></b>    | 5.4×10 <sup>4</sup>                                  | <b>6.0×10<sup>-4</sup></b>   | 4.5                                                     | <b>2.0×10<sup>-4</sup></b>      | 5.0×10 <sup>2</sup>              | <b>3.0×10<sup>-4</sup></b>       |
| P368V   | 1.0×10 <sup>2</sup>               | 4.0×10 <sup>-1</sup>       | 8.0×10 <sup>1</sup>   | 5.6×10 <sup>-1</sup>       | 1.2×10 <sup>6</sup>                                   | 4.9×10 <sup>-1</sup>          | 1.4×10 <sup>5</sup>                                  | <b>2.0×10<sup>-4</sup></b>   | 1.4×10 <sup>1</sup>                                     | 6.0×10 <sup>-1</sup>            | 5.8×10 <sup>2</sup>              | 1.6×10 <sup>-1</sup>             |
| T369G   | 1.8×10 <sup>2</sup>               | 2.7×10 <sup>-2</sup>       | 7.3×10 <sup>1</sup>   | 2.8×10 <sup>-1</sup>       | 2.4×10 <sup>6</sup>                                   | <b>7.1×10<sup>-3</sup></b>    | 4.7×10 <sup>5</sup>                                  | 2.7×10 <sup>-1</sup>         | 1.4×10 <sup>1</sup>                                     | 5.2×10 <sup>-1</sup>            | 5.3×10 <sup>2</sup>              | <b>8.9×10<sup>-3</sup></b>       |
| T369V   | 1.4×10 <sup>2</sup>               | 3.8×10 <sup>-1</sup>       | 8.1×10 <sup>1</sup>   | 6.4×10 <sup>-1</sup>       | 1.6×10 <sup>6</sup>                                   | 5.4×10 <sup>-1</sup>          | 3.7×10 <sup>5</sup>                                  | 5.3×10 <sup>-2</sup>         | 1.0×10 <sup>1</sup>                                     | 1.9×10 <sup>-1</sup>            | 5.5×10 <sup>2</sup>              | 1.1×10 <sup>-1</sup>             |
| G370A   | 2.8×10 <sup>1</sup>               | <b>0</b>                   | 7.3×10 <sup>1</sup>   | 2.3×10 <sup>-1</sup>       | 4.2×10 <sup>5</sup>                                   | <b>3.8×10<sup>-3</sup></b>    | 2.5×10 <sup>5</sup>                                  | 1.0×10 <sup>-2</sup>         | 4.5                                                     | <b>2.0×10<sup>-4</sup></b>      | 5.7×10 <sup>2</sup>              | 8.1×10 <sup>-2</sup>             |
| G370V   | 1.1×10 <sup>1</sup>               | <b>2.0×10<sup>-4</sup></b> | 9.9×10 <sup>1</sup>   | 2.2×10 <sup>-1</sup>       | 1.1×10 <sup>5</sup>                                   | <b>3.0×10<sup>-4</sup></b>    | 5.1×10 <sup>3</sup>                                  | <b>0</b>                     | ≤ 1.9                                                   | <b>4.2×10<sup>-3</sup></b>      | -                                | -                                |
| F371G   | 2.9×10 <sup>1</sup>               | <b>2.0×10<sup>-4</sup></b> | 1.1×10 <sup>2</sup>   | 2.3×10 <sup>-2</sup>       | 2.5×10 <sup>5</sup>                                   | <b>4.0×10<sup>-4</sup></b>    | 2.7×10 <sup>5</sup>                                  | 1.5×10 <sup>-2</sup>         | 2.8                                                     | <b>1.×10<sup>-4</sup></b>       | 5.5×10 <sup>2</sup>              | 5.3×10 <sup>-2</sup>             |
| F371V   | 2.2×10 <sup>2</sup>               | <b>0</b>                   | 1.5×10 <sup>2</sup>   | <b>0</b>                   | 1.3×10 <sup>6</sup>                                   | 7.3×10 <sup>-1</sup>          | 5.7×10 <sup>5</sup>                                  | 7.6×10 <sup>-1</sup>         | 8.1                                                     | 3.7×10 <sup>-2</sup>            | 6.2×10 <sup>2</sup>              | 9.4×10 <sup>-1</sup>             |
| F372G   | 8.7×10 <sup>1</sup>               | 9.4×10 <sup>-2</sup>       | 8.2×10 <sup>1</sup>   | 7.4×10 <sup>-1</sup>       | 9.3×10 <sup>5</sup>                                   | 1.3×10 <sup>-1</sup>          | 5.2×10 <sup>5</sup>                                  | 4.8×10 <sup>-1</sup>         | 1.8×10 <sup>1</sup>                                     | 7.6×10 <sup>-1</sup>            | 5.9×10 <sup>2</sup>              | 4.1×10 <sup>-1</sup>             |
| F372V   | 1.5×10 <sup>2</sup>               | 1.2×10 <sup>-1</sup>       | 1.2×10 <sup>2</sup>   | <b>2.2×10<sup>-3</sup></b> | 1.4×10 <sup>6</sup>                                   | 9.0×10 <sup>-1</sup>          | 5.1×10 <sup>5</sup>                                  | 3.9×10 <sup>-1</sup>         | 1.1×10 <sup>1</sup>                                     | 1.3×10 <sup>-1</sup>            | 6.8×10 <sup>2</sup>              | 4.4×10 <sup>-2</sup>             |
| V373A   | 1.2×10 <sup>2</sup>               | 9.0×10 <sup>-1</sup>       | 1.0×10 <sup>2</sup>   | 1.9×10 <sup>-1</sup>       | 1.2×10 <sup>6</sup>                                   | 5.3×10 <sup>-1</sup>          | 5.3×10 <sup>5</sup>                                  | 4.8×10 <sup>-1</sup>         | 7.3                                                     | <b>7.3×10<sup>-3</sup></b>      | 7.1×10 <sup>2</sup>              | <b>6.6×10<sup>-3</sup></b>       |
| V373G   | 6.0×10 <sup>1</sup>               | 3.6×10 <sup>-2</sup>       | 5.2×10 <sup>1</sup>   | 1.7×10 <sup>-2</sup>       | 1.0×10 <sup>6</sup>                                   | 3.3×10 <sup>-1</sup>          | 6.5×10 <sup>5</sup>                                  | 7.3×10 <sup>-1</sup>         | 1.3×10 <sup>1</sup>                                     | 3.8×10 <sup>-1</sup>            | 5.4×10 <sup>2</sup>              | 3.4×10 <sup>-2</sup>             |
| E374G   | 1.5×10 <sup>2</sup>               | 2.0×10 <sup>-1</sup>       | 7.1×10 <sup>1</sup>   | 2.2×10 <sup>-1</sup>       | 2.2×10 <sup>6</sup>                                   | 4.6×10 <sup>-2</sup>          | 4.8×10 <sup>5</sup>                                  | 2.6×10 <sup>-1</sup>         | 2.4×10 <sup>1</sup>                                     | 1.1×10 <sup>-2</sup>            | 5.0×10 <sup>2</sup>              | <b>6.7×10<sup>-3</sup></b>       |
| E374V   | 2.1×10 <sup>2</sup>               | <b>2.0×10<sup>-4</sup></b> | 9.3×10 <sup>1</sup>   | 4.6×10 <sup>-1</sup>       | 2.1×10 <sup>6</sup>                                   | 4.2×10 <sup>-2</sup>          | 5.6×10 <sup>5</sup>                                  | 7.1×10 <sup>-1</sup>         | 2.4×10 <sup>1</sup>                                     | 1.3×10 <sup>-2</sup>            | 5.6×10 <sup>2</sup>              | 1.1×10 <sup>-1</sup>             |
| D375G   | 5.9×10 <sup>1</sup>               | 2.1×10 <sup>-2</sup>       | 5.5×10 <sup>1</sup>   | 1.5×10 <sup>-2</sup>       | 8.8×10 <sup>5</sup>                                   | 1.6×10 <sup>-1</sup>          | 2.2×10 <sup>5</sup>                                  | <b>7.8×10<sup>-3</sup></b>   | 1.2×10 <sup>1</sup>                                     | 2.5×10 <sup>-1</sup>            | 4.9×10 <sup>2</sup>              | <b>3.0×10<sup>-4</sup></b>       |
| D375V   | 9.9×10 <sup>1</sup>               | 2.1×10 <sup>-1</sup>       | 9.7×10 <sup>1</sup>   | 2.4×10 <sup>-1</sup>       | 1.1×10 <sup>6</sup>                                   | 2.6×10 <sup>-1</sup>          | 1.0×10 <sup>5</sup>                                  | <b>5.3×10<sup>-3</sup></b>   | 1.0×10 <sup>1</sup>                                     | 1.7×10 <sup>-1</sup>            | 6.1×10 <sup>2</sup>              | 8.7×10 <sup>-1</sup>             |
| M376G   | 4.7×10 <sup>1</sup>               | <b>9.7×10<sup>-3</sup></b> | 6.5×10 <sup>1</sup>   | 1.4×10 <sup>-1</sup>       | 4.6×10 <sup>5</sup>                                   | 2.1×10 <sup>-2</sup>          | 2.9×10 <sup>5</sup>                                  | 2.5×10 <sup>-2</sup>         | 8.7                                                     | 1.4×10 <sup>-2</sup>            | 5.7×10 <sup>2</sup>              | 1.7×10 <sup>-1</sup>             |
| M376V   | 1.2×10 <sup>2</sup>               | 9.7×10 <sup>-1</sup>       | 8.8×10 <sup>1</sup>   | 8.0×10 <sup>-1</sup>       | 1.6×10 <sup>6</sup>                                   | 7.0×10 <sup>-1</sup>          | 7.9×10 <sup>5</sup>                                  | 1.1×10 <sup>-1</sup>         | 1.3×10 <sup>1</sup>                                     | 3.6×10 <sup>-1</sup>            | 6.2×10 <sup>2</sup>              | 6.8×10 <sup>-1</sup>             |
| K377G   | 1.5×10 <sup>2</sup>               | 3.4×10 <sup>-1</sup>       | 8.1×10 <sup>1</sup>   | 7.2×10 <sup>-1</sup>       | 1.8×10 <sup>6</sup>                                   | 3.8×10 <sup>-1</sup>          | 5.8×10 <sup>5</sup>                                  | 7.9×10 <sup>-1</sup>         | 1.4×10 <sup>1</sup>                                     | 5.7×10 <sup>-1</sup>            | 6.1×10 <sup>2</sup>              | 7.8×10 <sup>-1</sup>             |
| K377V   | 1.5×10 <sup>2</sup>               | 8.3×10 <sup>-2</sup>       | 1.0×10 <sup>2</sup>   | 3.8×10 <sup>-2</sup>       | 1.4×10 <sup>6</sup>                                   | 8.7×10 <sup>-1</sup>          | 6.0×10 <sup>5</sup>                                  | 9.4×10 <sup>-1</sup>         | 1.0×10 <sup>1</sup>                                     | 1.6×10 <sup>-1</sup>            | 5.7×10 <sup>2</sup>              | 1.5×10 <sup>-1</sup>             |
| K378G   | 9.0×10 <sup>1</sup>               | 1.4×10 <sup>-1</sup>       | 7.2×10 <sup>1</sup>   | 2.2×10 <sup>-1</sup>       | 1.3×10 <sup>6</sup>                                   | 8.5×10 <sup>-1</sup>          | 7.1×10 <sup>5</sup>                                  | 4.2×10 <sup>-1</sup>         | 2.4×10 <sup>1</sup>                                     | <b>8.0×10<sup>-3</sup></b>      | 5.9×10 <sup>2</sup>              | 3.5×10 <sup>-1</sup>             |
| K378V   | 2.2×10 <sup>2</sup>               | <b>1.2×10<sup>-3</sup></b> | 1.1×10 <sup>2</sup>   | 7.0×10 <sup>-2</sup>       | 1.7×10 <sup>6</sup>                                   | 4.9×10 <sup>-1</sup>          | 3.1×10 <sup>5</sup>                                  | 2.4×10 <sup>-2</sup>         | 1.7×10 <sup>1</sup>                                     | 8.0×10 <sup>-1</sup>            | 7.0×10 <sup>2</sup>              | 2.5×10 <sup>-2</sup>             |
| E379G   | 1.2×10 <sup>2</sup>               | 7.8×10 <sup>-1</sup>       | 6.8×10 <sup>1</sup>   | 1.8×10 <sup>-1</sup>       | 1.9×10 <sup>6</sup>                                   | 1.4×10 <sup>-1</sup>          | 4.1×10 <sup>5</sup>                                  | 1.0×10 <sup>-1</sup>         | 1.5×10 <sup>1</sup>                                     | 8.7×10 <sup>-1</sup>            | 5.6×10 <sup>2</sup>              | 7.4×10 <sup>-2</sup>             |
| E379V   | 2.3×10 <sup>2</sup>               | <b>1.×10<sup>-4</sup></b>  | 9.6×10 <sup>1</sup>   | 3.1×10 <sup>-1</sup>       | 2.1×10 <sup>6</sup>                                   | 3.6×10 <sup>-2</sup>          | 6.8×10 <sup>5</sup>                                  | 6.4×10 <sup>-1</sup>         | 2.3×10 <sup>1</sup>                                     | 5.8×10 <sup>-2</sup>            | 6.5×10 <sup>2</sup>              | 3.7×10 <sup>-1</sup>             |
| M380G   | 1.1×10 <sup>2</sup>               | 6.3×10 <sup>-1</sup>       | 7.6×10 <sup>1</sup>   | 2.1×10 <sup>-1</sup>       | 1.4×10 <sup>6</sup>                                   | 1.0                           | 3.2×10 <sup>5</sup>                                  | <b>3.3×10<sup>-3</sup></b>   | 1.2×10 <sup>1</sup>                                     | 9.4×10 <sup>-2</sup>            | 5.5×10 <sup>2</sup>              | <b>3.3×10<sup>-3</sup></b>       |
| M380V   | 1.4×10 <sup>2</sup>               | 4.0×10 <sup>-1</sup>       | 9.1×10 <sup>1</sup>   | 6.1×10 <sup>-1</sup>       | 1.4×10 <sup>6</sup>                                   | 9.9×10 <sup>-1</sup>          | 3.7×10 <sup>5</sup>                                  | 4.7×10 <sup>-2</sup>         | 1.9×10 <sup>1</sup>                                     | 6.1×10 <sup>-1</sup>            | 6.3×10 <sup>2</sup>              | 5.8×10 <sup>-1</sup>             |
| N381G   | 7.3×10 <sup>1</sup>               | 5.0×10 <sup>-2</sup>       | 7.4×10 <sup>1</sup>   | 3.0×10 <sup>-1</sup>       | 1.4×10 <sup>6</sup>                                   | 8.9×10 <sup>-1</sup>          | 5.5×10 <sup>5</sup>                                  | 6.2×10 <sup>-1</sup>         | 1.4×10 <sup>1</sup>                                     | 6.4×10 <sup>-1</sup>            | 6.4×10 <sup>2</sup>              | 4.5×10 <sup>-1</sup>             |
| N381V   | 5.3×10 <sup>1</sup>               | <b>2.6×10<sup>-3</sup></b> | 8.5×10 <sup>1</sup>   | 9.4×10 <sup>-1</sup>       | 5.8×10 <sup>5</sup>                                   | 1.2×10 <sup>-2</sup>          | 1.7×10 <sup>5</sup>                                  | <b>3.3×10<sup>-3</sup></b>   | 5.4                                                     | <b>6.0×10<sup>-3</sup></b>      | 5.4×10 <sup>2</sup>              | 3.1×10 <sup>-2</sup>             |
| A382G   | 1.1×10 <sup>2</sup>               | 5.9×10 <sup>-1</sup>       | 7.9×10 <sup>1</sup>   | 6.1×10 <sup>-1</sup>       | 1.4×10 <sup>6</sup>                                   | 8.7×10 <sup>-1</sup>          | 1.1×10 <sup>6</sup>                                  | <b>8.1×10<sup>-3</sup></b>   | 2.0×10 <sup>1</sup>                                     | 2.7×10 <sup>-1</sup>            | 6.3×10 <sup>2</sup>              | 7.0×10 <sup>-1</sup>             |
| A382V   | 2.0×10 <sup>2</sup>               | <b>5.0×10<sup>-4</sup></b> | 1.1×10 <sup>2</sup>   | 1.2×10 <sup>-2</sup>       | 1.9×10 <sup>6</sup>                                   | 1.1×10 <sup>-1</sup>          | 5.6×10 <sup>5</sup>                                  | 7.1×10 <sup>-1</sup>         | 1.5×10 <sup>1</sup>                                     | 8.0×10 <sup>-1</sup>            | 6.9×10 <sup>2</sup>              | 3.8×10 <sup>-2</sup>             |
| K383G   | 6.4×10 <sup>1</sup>               | 5.2×10 <sup>-2</sup>       | 6.2×10 <sup>1</sup>   | 8.3×10 <sup>-2</sup>       | 1.1×10 <sup>6</sup>                                   | 5.7×10 <sup>-1</sup>          | 5.5×10 <sup>5</sup>                                  | 7.5×10 <sup>-1</sup>         | 9.3                                                     | 1.5×10 <sup>-2</sup>            | 5.2×10 <sup>2</sup>              | 1.3×10 <sup>-2</sup>             |
| K383V   | 1.7×10 <sup>2</sup>               | 1.6×10 <sup>-2</sup>       | 1.0×10 <sup>2</sup>   | 7.6×10 <sup>-2</sup>       | 1.6×10 <sup>6</sup>                                   | 5.6×10 <sup>-1</sup>          | 2.6×10 <sup>5</sup>                                  | <b>3.8×10<sup>-3</sup></b>   | 1.2×10 <sup>1</sup>                                     | 2.0×10 <sup>-1</sup>            | 7.0×10 <sup>2</sup>              | <b>7.0×10<sup>-3</sup></b>       |
| L384G   | 5.7×10 <sup>1</sup>               | 1.4×10 <sup>-2</sup>       | 5.5×10 <sup>1</sup>   | 1.5×10 <sup>-2</sup>       | 1.2×10 <sup>6</sup>                                   | 4.8×10 <sup>-1</sup>          | 2.1×10 <sup>5</sup>                                  | <b>4.6×10<sup>-3</sup></b>   | 1.5×10 <sup>1</sup>                                     | 6.8×10 <sup>-1</sup>            | 4.9×10 <sup>2</sup>              | <b>4.7×10<sup>-3</sup></b>       |
| L384V   | 1.1×10 <sup>2</sup>               | 7.3×10 <sup>-1</sup>       | 8.7×10 <sup>1</sup>   | 8.2×10 <sup>-1</sup>       | 1.2×10 <sup>6</sup>                                   | 7.0×10 <sup>-1</sup>          | 4.1×10 <sup>5</sup>                                  | 8.5×10 <sup>-2</sup>         | 1.3×10 <sup>1</sup>                                     | 2.8×10 <sup>-1</sup>            | 6.5×10 <sup>2</sup>              | 4.7×10 <sup>-1</sup>             |
| K385G   | 1.6×10 <sup>2</sup>               | 9.0×10 <sup>-2</sup>       | 1.1×10 <sup>2</sup>   | 5.1×10 <sup>-2</sup>       | 1.5×10 <sup>6</sup>                                   | 8.3×10 <sup>-1</sup>          | 4.5×10 <sup>5</sup>                                  | 2.0×10 <sup>-1</sup>         | 1.2×10 <sup>1</sup>                                     | 2.6×10 <sup>-1</sup>            | 7.2×10 <sup>2</sup>              | <b>3.9×10<sup>-3</sup></b>       |
| K385V   | 1.9×10 <sup>2</sup>               | <b>7.0×10<sup>-4</sup></b> | 9.6×10 <sup>1</sup>   | 2.3×10 <sup>-1</sup>       | 2.1×10 <sup>6</sup>                                   | 2.1×10 <sup>-2</sup>          | 4.4×10 <sup>5</sup>                                  | 1.1×10 <sup>-1</sup>         | 2.1×10 <sup>1</sup>                                     | 2.8×10 <sup>-1</sup>            | 7.4×10 <sup>2</sup>              | <b>1.7×10<sup>-3</sup></b>       |
| Q386G   | 7.6                               | <b>1.8×10<sup>-3</sup></b> | 6.9×10 <sup>1</sup>   | 2.5×10 <sup>-1</sup>       | 1.1×10 <sup>5</sup>                                   | <b>3.0×10<sup>-3</sup></b>    | 8.9×10 <sup>4</sup>                                  | <b>3.4×10<sup>-3</sup></b>   | ≤ 9.9×10 <sup>-1</sup>                                  | <b>0</b>                        | 4.5×10 <sup>2</sup>              | <b>3.0×10<sup>-4</sup></b>       |
| Q386V   | 1.8×10 <sup>2</sup>               | 3.7×10 <sup>-2</sup>       | 1.0×10 <sup>2</sup>   | 2.1×10 <sup>-1</sup>       | 2.2×10 <sup>6</sup>                                   | 9.4×10 <sup>-2</sup>          | 4.7×10 <sup>5</sup>                                  | 3.1×10 <sup>-1</sup>         | 2.3×10 <sup>1</sup>                                     | 4.0×10 <sup>-2</sup>            | 6.3×10 <sup>2</sup>              | 6.3×10 <sup>-1</sup>             |
| K387G   | 6.6×10 <sup>1</sup>               | 1.1×10 <sup>-2</sup>       | 6.5×10 <sup>1</sup>   | 6.9×10 <sup>-2</sup>       | 8.4×10 <sup>5</sup>                                   | 7.9×10 <sup>-2</sup>          | 4.0×10 <sup>5</sup>                                  | 9.7×10 <sup>-2</sup>         | 1.2×10 <sup>1</sup>                                     | 2.7×10 <sup>-1</sup>            | 5.5×10 <sup>2</sup>              | 6.6×10 <sup>-2</sup>             |
| K387V   | 2.3×10 <sup>2</sup>               | <b>1.×10<sup>-4</sup></b>  | 1.2×10 <sup>2</sup>   | <b>1.7×10<sup>-3</sup></b> | 1.8×10 <sup>6</sup>                                   | 1.9×10 <sup>-1</sup>          | 4.2×10 <sup>5</sup>                                  | 5.7×10 <sup>-2</sup>         | 1.6×10 <sup>1</sup>                                     | 9.2×10 <sup>-1</sup>            | 7.1×10 <sup>2</sup>              | 2.4×10 <sup>-2</sup>             |
| F388G   | 3.2×10 <sup>1</sup>               | <b>1.0×10<sup>-3</sup></b> | 6.5×10 <sup>1</sup>   | 8.5×10 <sup>-2</sup>       | 4.1×10 <sup>5</sup>                                   | <b>5.7×10<sup>-3</sup></b>    | 1.5×10 <sup>5</sup>                                  | <b>2.5×10<sup>-3</sup></b>   | ≤ 2.7                                                   | <b>1.×10<sup>-4</sup></b>       | 5.9×10 <sup>2</sup>              | 4.1×10 <sup>-1</sup>             |
| F388V   | 1.6×10 <sup>2</sup>               | 1.2×10 <sup>-1</sup>       | 9.1×10 <sup>1</sup>   | 5.9×10 <sup>-1</sup>       | 1.7×10 <sup>6</sup>                                   | 4.3×10 <sup>-1</sup>          | 1.8×10 <sup>5</sup>                                  | <b>7.0×10<sup>-4</sup></b>   | 1.7×10 <sup>1</sup>                                     | 8.4×10 <sup>-1</sup>            | 6.6×10 <sup>2</sup>              | 1.7×10 <sup>-1</sup>             |
| G389A   | 1.3×10 <sup>2</sup>               | 6.5×10 <sup>-1</sup>       | 7.7×10 <sup>1</sup>   | 3.5×10 <sup>-1</sup>       | 1.8×10 <sup>6</sup>                                   | 2.8×10 <sup>-1</sup>          | 8.2×10 <sup>5</sup>                                  | 9.9×10 <sup>-2</sup>         | 1.5×10 <sup>1</sup>                                     | 7.4×10 <sup>-1</sup>            | 6.3×10 <sup>2</sup>              | 6.3×10 <sup>-1</sup>             |
| G389V   | 1.0×10 <sup>2</sup>               | 2.3×10 <sup>-1</sup>       | 8.9×10 <sup>1</sup>   | 7.7×10 <sup>-1</sup>       | 1.1×10 <sup>6</sup>                                   | 3.3×10 <sup>-1</sup>          | 3.4×10 <sup>5</sup>                                  | 8.2×10 <sup>-2</sup>         | 1.4×10 <sup>1</sup>                                     | 5.9×10 <sup>-1</sup>            | 6.5×10 <sup>2</sup>              | 2.5×10 <sup>-1</sup>             |
| A390G   | 1.0×10 <sup>2</sup>               | 3.3×10 <sup>-1</sup>       | 7.1×10 <sup>1</sup>   | 2.4×10 <sup>-1</sup>       | 1.5×10 <sup>6</sup>                                   | 6.8×10 <sup>-1</sup>          | 5.6×10 <sup>5</sup>                                  | 7.6×10 <sup>-1</sup>         | 1.6×10 <sup>1</sup>                                     | 9.5×10 <sup>-1</sup>            | 5.8×10 <sup>2</sup>              | 2.3×10 <sup>-1</sup>             |
| A390V   | 2.0×10 <sup>2</sup>               | <b>9.0×10<sup>-4</sup></b> | 9.7×10 <sup>1</sup>   | 2.5×10 <sup>-1</sup>       | 2.1×10 <sup>6</sup>                                   | 5.4×10 <sup>-2</sup>          | 3.9×10 <sup>5</sup>                                  | 1.3×10 <sup>-1</sup>         | 2.1×10 <sup>1</sup>                                     | 3.4×10 <sup>-1</sup>            | 7.3×10 <sup>2</sup>              | 1.6×10 <sup>-2</sup>             |
| D391G   | 1.0×10 <sup>2</sup>               | 5.1×10 <sup>-1</sup>       | 5.9×10 <sup>1</sup>   | 5.5×10 <sup>-2</sup>       | 1.2×10 <sup>6</sup>                                   | 6.7×10 <sup>-1</sup>          | 4.2×10 <sup>5</sup>                                  | 1.3×10 <sup>-1</sup>         | 1.2×10 <sup>1</sup>                                     | 3.7×10 <sup>-1</sup>            | 5.0×10 <sup>2</sup>              | 3.0×1                            |

| Variant | $k_{cat}$ cMUP (s <sup>-1</sup> ) | $k_{cat}$ cMUP $p$ -value  | $K_M$ cMUP ( $\mu$ M) | $K_M$ cMUP $p$ -value      | $k_{cat}/K_M$ cMUP (M <sup>-1</sup> s <sup>-1</sup> ) | $k_{cat}/K_M$ cMUP $p$ -value | $k_{cat}/K_M$ MeP (M <sup>-1</sup> s <sup>-1</sup> ) | $k_{cat}/K_M$ MeP $p$ -value | $k_{cat}/K_M$ MecMUP (M <sup>-1</sup> s <sup>-1</sup> ) | $k_{cat}/K_M$ MecMUP $p$ -value | $K_i$ PO <sub>4</sub> ( $\mu$ M) | $K_i$ PO <sub>4</sub> $p$ -value |
|---------|-----------------------------------|----------------------------|-----------------------|----------------------------|-------------------------------------------------------|-------------------------------|------------------------------------------------------|------------------------------|---------------------------------------------------------|---------------------------------|----------------------------------|----------------------------------|
| V402A   | 1.9×10 <sup>2</sup>               | <b>2.3×10<sup>-3</sup></b> | 8.8×10 <sup>1</sup>   | 8.1×10 <sup>-1</sup>       | 2.2×10 <sup>6</sup>                                   | 1.3×10 <sup>-2</sup>          | 2.3×10 <sup>5</sup>                                  | <b>1.0×10<sup>-3</sup></b>   | 1.4×10 <sup>1</sup>                                     | 6.8×10 <sup>-1</sup>            | 6.3×10 <sup>2</sup>              | 4.4×10 <sup>-1</sup>             |
| V402G   | 5.0×10 <sup>1</sup>               | <b>2.1×10<sup>-3</sup></b> | 6.8×10 <sup>1</sup>   | 9.9×10 <sup>-2</sup>       | 8.5×10 <sup>5</sup>                                   | 8.8×10 <sup>-2</sup>          | 1.7×10 <sup>5</sup>                                  | <b>2.7×10<sup>-3</sup></b>   | 9.2                                                     | 1.9×10 <sup>-2</sup>            | 5.4×10 <sup>2</sup>              | 1.3×10 <sup>-2</sup>             |
| Y403G   | 1.4×10 <sup>1</sup>               | <b>9.0×10<sup>-4</sup></b> | 4.9×10 <sup>1</sup>   | 1.1×10 <sup>-2</sup>       | 4.3×10 <sup>5</sup>                                   | 1.6×10 <sup>-2</sup>          | 2.4×10 <sup>5</sup>                                  | <b>9.3×10<sup>-3</sup></b>   | ≤ 1.7                                                   | <b>5.0×10<sup>-4</sup></b>      | 4.3×10 <sup>2</sup>              | <b>1.×10<sup>-4</sup></b>        |
| Y403V   | 1.0×10 <sup>2</sup>               | 4.5×10 <sup>-1</sup>       | 8.4×10 <sup>1</sup>   | 8.4×10 <sup>-1</sup>       | 1.3×10 <sup>6</sup>                                   | 8.4×10 <sup>-1</sup>          | 1.7×10 <sup>5</sup>                                  | <b>3.2×10<sup>-3</sup></b>   | 1.2×10 <sup>1</sup>                                     | 1.8×10 <sup>-1</sup>            | 6.6×10 <sup>2</sup>              | 1.4×10 <sup>-1</sup>             |
| F404G   | 5.4×10 <sup>1</sup>               | 1.9×10 <sup>-2</sup>       | 7.1×10 <sup>1</sup>   | 2.6×10 <sup>-1</sup>       | 7.1×10 <sup>5</sup>                                   | 8.1×10 <sup>-2</sup>          | 1.1×10 <sup>5</sup>                                  | <b>1.3×10<sup>-3</sup></b>   | 3.9                                                     | <b>2.4×10<sup>-3</sup></b>      | 5.3×10 <sup>2</sup>              | 8.2×10 <sup>-2</sup>             |
| F404V   | 1.9×10 <sup>2</sup>               | <b>1.6×10<sup>-3</sup></b> | 9.0×10 <sup>1</sup>   | 5.7×10 <sup>-1</sup>       | 2.2×10 <sup>6</sup>                                   | <b>6.7×10<sup>-3</sup></b>    | 2.4×10 <sup>5</sup>                                  | <b>7.9×10<sup>-3</sup></b>   | 1.9×10 <sup>1</sup>                                     | 4.2×10 <sup>-1</sup>            | 7.1×10 <sup>2</sup>              | 1.4×10 <sup>-2</sup>             |
| D405G   | 4.6×10 <sup>1</sup>               | <b>7.5×10<sup>-3</sup></b> | 5.7×10 <sup>1</sup>   | 4.6×10 <sup>-2</sup>       | 8.0×10 <sup>5</sup>                                   | 1.6×10 <sup>-1</sup>          | 9.1×10 <sup>4</sup>                                  | <b>5.3×10<sup>-3</sup></b>   | 9.3                                                     | 4.4×10 <sup>-2</sup>            | 4.8×10 <sup>2</sup>              | <b>2.8×10<sup>-3</sup></b>       |
| D405V   | 9.7×10 <sup>1</sup>               | 1.8×10 <sup>-1</sup>       | 8.6×10 <sup>1</sup>   | 9.2×10 <sup>-1</sup>       | 1.1×10 <sup>6</sup>                                   | 3.2×10 <sup>-1</sup>          | 1.5×10 <sup>4</sup>                                  | <b>0</b>                     | 4.9                                                     | <b>2.8×10<sup>-3</sup></b>      | 6.3×10 <sup>2</sup>              | 6.0×10 <sup>-1</sup>             |
| R406G   | 1.3×10 <sup>2</sup>               | 8.1×10 <sup>-1</sup>       | 8.6×10 <sup>1</sup>   | 9.7×10 <sup>-1</sup>       | 1.4×10 <sup>6</sup>                                   | 8.8×10 <sup>-1</sup>          | 2.7×10 <sup>5</sup>                                  | 6.2×10 <sup>-2</sup>         | 1.4×10 <sup>1</sup>                                     | 6.3×10 <sup>-1</sup>            | 7.3×10 <sup>2</sup>              | 2.2×10 <sup>-2</sup>             |
| R406V   | 2.6×10 <sup>2</sup>               | <b>0</b>                   | 1.1×10 <sup>2</sup>   | 2.8×10 <sup>-2</sup>       | 2.1×10 <sup>6</sup>                                   | 4.9×10 <sup>-2</sup>          | 4.0×10 <sup>5</sup>                                  | 6.5×10 <sup>-2</sup>         | 1.7×10 <sup>1</sup>                                     | 7.3×10 <sup>-1</sup>            | 7.3×10 <sup>2</sup>              | 2.2×10 <sup>-2</sup>             |
| K407G   | 1.3×10 <sup>2</sup>               | 6.3×10 <sup>-1</sup>       | 7.3×10 <sup>1</sup>   | 3.4×10 <sup>-1</sup>       | 1.6×10 <sup>6</sup>                                   | 6.1×10 <sup>-1</sup>          | 8.5×10 <sup>5</sup>                                  | 6.0×10 <sup>-2</sup>         | 1.9×10 <sup>1</sup>                                     | 4.5×10 <sup>-1</sup>            | 5.8×10 <sup>2</sup>              | 1.9×10 <sup>-1</sup>             |
| K407V   | 1.9×10 <sup>2</sup>               | <b>3.4×10<sup>-3</sup></b> | 9.8×10 <sup>1</sup>   | 1.7×10 <sup>-1</sup>       | 1.9×10 <sup>6</sup>                                   | 1.5×10 <sup>-1</sup>          | 4.4×10 <sup>5</sup>                                  | 8.8×10 <sup>-2</sup>         | 1.4×10 <sup>1</sup>                                     | 6.3×10 <sup>-1</sup>            | 6.8×10 <sup>2</sup>              | 5.6×10 <sup>-2</sup>             |
| V408A   | 2.1×10 <sup>2</sup>               | <b>6.0×10<sup>-4</sup></b> | 9.7×10 <sup>1</sup>   | 2.4×10 <sup>-1</sup>       | 2.1×10 <sup>6</sup>                                   | 4.1×10 <sup>-2</sup>          | 8.8×10 <sup>5</sup>                                  | 1.2×10 <sup>-1</sup>         | 2.2×10 <sup>1</sup>                                     | 1.0×10 <sup>-1</sup>            | 6.7×10 <sup>2</sup>              | 1.1×10 <sup>-1</sup>             |
| V408G   | 9.4×10 <sup>1</sup>               | 1.7×10 <sup>-1</sup>       | 7.8×10 <sup>1</sup>   | 4.0×10 <sup>-1</sup>       | 1.4×10 <sup>6</sup>                                   | 8.3×10 <sup>-1</sup>          | 2.0×10 <sup>5</sup>                                  | 1.5×10 <sup>-2</sup>         | 1.4×10 <sup>1</sup>                                     | 4.2×10 <sup>-1</sup>            | 6.6×10 <sup>2</sup>              | 8.7×10 <sup>-2</sup>             |
| L409G   | 2.4×10 <sup>1</sup>               | <b>0</b>                   | 6.8×10 <sup>1</sup>   | 8.0×10 <sup>-2</sup>       | 3.9×10 <sup>5</sup>                                   | <b>1.0×10<sup>-3</sup></b>    | 9.2×10 <sup>4</sup>                                  | <b>6.0×10<sup>-4</sup></b>   | 5.1                                                     | <b>0</b>                        | 5.9×10 <sup>2</sup>              | 4.2×10 <sup>-1</sup>             |
| L409V   | 1.3×10 <sup>2</sup>               | 7.0×10 <sup>-1</sup>       | 9.3×10 <sup>1</sup>   | 3.5×10 <sup>-1</sup>       | 1.3×10 <sup>6</sup>                                   | 6.4×10 <sup>-1</sup>          | 1.3×10 <sup>5</sup>                                  | <b>8.9×10<sup>-3</sup></b>   | 9.6                                                     | 1.1×10 <sup>-1</sup>            | 7.2×10 <sup>2</sup>              | 1.2×10 <sup>-2</sup>             |
| A410G   | 1.3×10 <sup>2</sup>               | 6.5×10 <sup>-1</sup>       | 7.3×10 <sup>1</sup>   | 3.4×10 <sup>-1</sup>       | 1.8×10 <sup>6</sup>                                   | 2.9×10 <sup>-1</sup>          | 8.3×10 <sup>5</sup>                                  | 7.0×10 <sup>-2</sup>         | 1.6×10 <sup>1</sup>                                     | 9.5×10 <sup>-1</sup>            | 6.0×10 <sup>2</sup>              | 6.4×10 <sup>-1</sup>             |
| A410V   | 1.4×10 <sup>2</sup>               | 3.3×10 <sup>-1</sup>       | 9.6×10 <sup>1</sup>   | 2.6×10 <sup>-1</sup>       | 1.7×10 <sup>6</sup>                                   | 3.5×10 <sup>-1</sup>          | 3.7×10 <sup>5</sup>                                  | 3.6×10 <sup>-2</sup>         | 1.4×10 <sup>1</sup>                                     | 6.7×10 <sup>-1</sup>            | 6.5×10 <sup>2</sup>              | 2.7×10 <sup>-1</sup>             |
| D411G   | 1.2×10 <sup>2</sup>               | 8.7×10 <sup>-1</sup>       | 8.5×10 <sup>1</sup>   | 9.8×10 <sup>-1</sup>       | 1.4×10 <sup>6</sup>                                   | 9.6×10 <sup>-1</sup>          | 4.2×10 <sup>5</sup>                                  | 1.1×10 <sup>-1</sup>         | 1.4×10 <sup>1</sup>                                     | 5.0×10 <sup>-1</sup>            | 6.5×10 <sup>2</sup>              | 2.5×10 <sup>-1</sup>             |
| D411V   | 1.6×10 <sup>2</sup>               | <b>4.5×10<sup>-3</sup></b> | 9.3×10 <sup>1</sup>   | 2.5×10 <sup>-1</sup>       | 1.7×10 <sup>6</sup>                                   | 2.0×10 <sup>-1</sup>          | 3.2×10 <sup>5</sup>                                  | <b>5.0×10<sup>-4</sup></b>   | 1.3×10 <sup>1</sup>                                     | 1.6×10 <sup>-1</sup>            | 6.3×10 <sup>2</sup>              | 2.4×10 <sup>-1</sup>             |
| S412G   | 9.3×10 <sup>1</sup>               | 1.6×10 <sup>-1</sup>       | 8.0×10 <sup>1</sup>   | 5.6×10 <sup>-1</sup>       | 1.3×10 <sup>6</sup>                                   | 7.9×10 <sup>-1</sup>          | 3.0×10 <sup>5</sup>                                  | 1.8×10 <sup>-2</sup>         | 1.3×10 <sup>1</sup>                                     | 2.8×10 <sup>-1</sup>            | 5.8×10 <sup>2</sup>              | 2.4×10 <sup>-1</sup>             |
| S412V   | 2.4×10 <sup>2</sup>               | <b>1.×10<sup>-4</sup></b>  | 1.1×10 <sup>2</sup>   | 1.1×10 <sup>-2</sup>       | 1.9×10 <sup>6</sup>                                   | 1.2×10 <sup>-1</sup>          | 5.5×10 <sup>5</sup>                                  | 5.5×10 <sup>-1</sup>         | 1.8×10 <sup>1</sup>                                     | 6.9×10 <sup>-1</sup>            | 6.8×10 <sup>2</sup>              | 6.9×10 <sup>-2</sup>             |
| K413G   | 1.2×10 <sup>2</sup>               | 9.4×10 <sup>-1</sup>       | 8.3×10 <sup>1</sup>   | 7.6×10 <sup>-1</sup>       | 1.6×10 <sup>6</sup>                                   | 6.9×10 <sup>-1</sup>          | 3.9×10 <sup>5</sup>                                  | 1.8×10 <sup>-1</sup>         | 2.4×10 <sup>1</sup>                                     | <b>5.1×10<sup>-3</sup></b>      | 5.8×10 <sup>2</sup>              | 1.4×10 <sup>-1</sup>             |
| K413V   | 2.0×10 <sup>2</sup>               | <b>7.0×10<sup>-4</sup></b> | 8.8×10 <sup>1</sup>   | 7.7×10 <sup>-1</sup>       | 2.1×10 <sup>6</sup>                                   | 3.0×10 <sup>-2</sup>          | 3.1×10 <sup>5</sup>                                  | <b>9.6×10<sup>-3</sup></b>   | 1.6×10 <sup>1</sup>                                     | 8.2×10 <sup>-1</sup>            | 6.5×10 <sup>2</sup>              | 2.1×10 <sup>-1</sup>             |
| L414G   | 3.3×10 <sup>1</sup>               | <b>6.0×10<sup>-4</sup></b> | 7.4×10 <sup>1</sup>   | 3.4×10 <sup>-1</sup>       | 5.4×10 <sup>5</sup>                                   | 1.8×10 <sup>-2</sup>          | 9.1×10 <sup>4</sup>                                  | <b>1.5×10<sup>-3</sup></b>   | 6.5                                                     | <b>2.1×10<sup>-3</sup></b>      | 6.0×10 <sup>2</sup>              | 5.3×10 <sup>-1</sup>             |
| L414V   | 9.4×10 <sup>1</sup>               | 2.0×10 <sup>-1</sup>       | 8.8×10 <sup>1</sup>   | 7.9×10 <sup>-1</sup>       | 9.2×10 <sup>5</sup>                                   | 1.8×10 <sup>-1</sup>          | 2.7×10 <sup>5</sup>                                  | <b>3.7×10<sup>-3</sup></b>   | 1.2×10 <sup>1</sup>                                     | 1.7×10 <sup>-1</sup>            | 6.4×10 <sup>2</sup>              | 5.5×10 <sup>-1</sup>             |
| E415G   | 8.1×10 <sup>1</sup>               | 7.6×10 <sup>-2</sup>       | 7.3×10 <sup>1</sup>   | 2.9×10 <sup>-1</sup>       | 6.9×10 <sup>5</sup>                                   | 6.4×10 <sup>-2</sup>          | 2.0×10 <sup>5</sup>                                  | <b>5.0×10<sup>-3</sup></b>   | 1.7×10 <sup>1</sup>                                     | 6.4×10 <sup>-1</sup>            | 5.9×10 <sup>2</sup>              | 3.6×10 <sup>-1</sup>             |
| E415V   | 1.2×10 <sup>2</sup>               | 9.7×10 <sup>-1</sup>       | 8.5×10 <sup>1</sup>   | 9.7×10 <sup>-1</sup>       | 1.3×10 <sup>6</sup>                                   | 7.4×10 <sup>-1</sup>          | 6.2×10 <sup>5</sup>                                  | 9.6×10 <sup>-1</sup>         | 9.9                                                     | 5.8×10 <sup>-2</sup>            | 6.2×10 <sup>2</sup>              | 5.8×10 <sup>-1</sup>             |
| L416G   | 3.2×10 <sup>1</sup>               | 1.0×10 <sup>-2</sup>       | 8.1×10 <sup>1</sup>   | 7.8×10 <sup>-1</sup>       | 3.9×10 <sup>5</sup>                                   | 4.1×10 <sup>-2</sup>          | 5.7×10 <sup>5</sup>                                  | 7.1×10 <sup>-1</sup>         | ≤ 9.9×10 <sup>-1</sup>                                  | <b>0</b>                        | 6.6×10 <sup>2</sup>              | 1.8×10 <sup>-1</sup>             |
| L416V   | 5.0×10 <sup>1</sup>               | <b>4.1×10<sup>-3</sup></b> | 9.6×10 <sup>1</sup>   | 3.6×10 <sup>-1</sup>       | 5.1×10 <sup>5</sup>                                   | 1.2×10 <sup>-2</sup>          | 9.9×10 <sup>4</sup>                                  | <b>0</b>                     | 7.3                                                     | 2.0×10 <sup>-2</sup>            | 6.7×10 <sup>2</sup>              | 1.1×10 <sup>-1</sup>             |
| D417G   | 7.2×10 <sup>1</sup>               | 3.6×10 <sup>-2</sup>       | 7.1×10 <sup>1</sup>   | 2.2×10 <sup>-1</sup>       | 1.1×10 <sup>6</sup>                                   | 4.8×10 <sup>-1</sup>          | 3.1×10 <sup>5</sup>                                  | 2.6×10 <sup>-2</sup>         | 1.2×10 <sup>1</sup>                                     | 2.6×10 <sup>-1</sup>            | 6.4×10 <sup>2</sup>              | 5.8×10 <sup>-1</sup>             |
| D417V   | 1.2×10 <sup>2</sup>               | 7.6×10 <sup>-1</sup>       | 1.0×10 <sup>2</sup>   | 1.5×10 <sup>-1</sup>       | 1.2×10 <sup>6</sup>                                   | 6.1×10 <sup>-1</sup>          | 2.4×10 <sup>5</sup>                                  | <b>2.7×10<sup>-3</sup></b>   | 1.1×10 <sup>1</sup>                                     | 1.6×10 <sup>-1</sup>            | 7.1×10 <sup>2</sup>              | 2.1×10 <sup>-2</sup>             |
| D418G   | 9.2×10 <sup>1</sup>               | 2.5×10 <sup>-1</sup>       | 7.8×10 <sup>1</sup>   | 6.3×10 <sup>-1</sup>       | 1.3×10 <sup>6</sup>                                   | 7.7×10 <sup>-1</sup>          | 2.6×10 <sup>5</sup>                                  | 1.4×10 <sup>-2</sup>         | 1.7×10 <sup>1</sup>                                     | 8.5×10 <sup>-1</sup>            | 6.7×10 <sup>2</sup>              | 1.6×10 <sup>-1</sup>             |
| D418V   | 2.1×10 <sup>2</sup>               | <b>1.0×10<sup>-3</sup></b> | 1.1×10 <sup>2</sup>   | 7.5×10 <sup>-2</sup>       | 2.2×10 <sup>6</sup>                                   | 4.1×10 <sup>-2</sup>          | 3.1×10 <sup>5</sup>                                  | 1.3×10 <sup>-2</sup>         | 2.2×10 <sup>1</sup>                                     | 1.5×10 <sup>-1</sup>            | 6.7×10 <sup>2</sup>              | 1.2×10 <sup>-1</sup>             |
| V419A   | 1.4×10 <sup>2</sup>               | 3.1×10 <sup>-1</sup>       | 9.3×10 <sup>1</sup>   | 3.7×10 <sup>-1</sup>       | 1.5×10 <sup>6</sup>                                   | 7.8×10 <sup>-1</sup>          | 3.3×10 <sup>5</sup>                                  | 1.9×10 <sup>-2</sup>         | 1.4×10 <sup>1</sup>                                     | 6.6×10 <sup>-1</sup>            | 6.5×10 <sup>2</sup>              | 1.6×10 <sup>-1</sup>             |
| V419G   | 2.7×10 <sup>1</sup>               | <b>4.7×10<sup>-3</sup></b> | 5.4×10 <sup>1</sup>   | 3.4×10 <sup>-2</sup>       | 5.3×10 <sup>5</sup>                                   | 3.6×10 <sup>-2</sup>          | 7.3×10 <sup>4</sup>                                  | <b>8.0×10<sup>-4</sup></b>   | 6.4                                                     | <b>2.3×10<sup>-3</sup></b>      | 4.8×10 <sup>2</sup>              | <b>8.5×10<sup>-3</sup></b>       |
| R420G   | 2.7×10 <sup>1</sup>               | <b>3.0×10<sup>-4</sup></b> | 7.2×10 <sup>1</sup>   | 1.9×10 <sup>-1</sup>       | 4.7×10 <sup>5</sup>                                   | <b>4.1×10<sup>-3</sup></b>    | 9.8×10 <sup>4</sup>                                  | <b>4.9×10<sup>-3</sup></b>   | 4.9                                                     | <b>2.0×10<sup>-4</sup></b>      | 6.0×10 <sup>2</sup>              | 4.1×10 <sup>-1</sup>             |
| R420V   | 9.1×10 <sup>1</sup>               | 8.8×10 <sup>-2</sup>       | 9.1×10 <sup>1</sup>   | 5.5×10 <sup>-1</sup>       | 9.2×10 <sup>5</sup>                                   | 7.5×10 <sup>-2</sup>          | 2.2×10 <sup>5</sup>                                  | <b>1.4×10<sup>-3</sup></b>   | ≤ 4.1                                                   | <b>2.0×10<sup>-3</sup></b>      | 7.4×10 <sup>2</sup>              | <b>1.0×10<sup>-3</sup></b>       |
| D421G   | 1.2×10 <sup>2</sup>               | 9.0×10 <sup>-1</sup>       | 8.9×10 <sup>1</sup>   | 6.7×10 <sup>-1</sup>       | 1.4×10 <sup>6</sup>                                   | 8.3×10 <sup>-1</sup>          | 3.3×10 <sup>5</sup>                                  | 2.7×10 <sup>-2</sup>         | 1.5×10 <sup>1</sup>                                     | 7.9×10 <sup>-1</sup>            | 6.2×10 <sup>2</sup>              | 7.9×10 <sup>-1</sup>             |
| D421V   | 7.9×10 <sup>1</sup>               | 4.2×10 <sup>-2</sup>       | 7.9×10 <sup>1</sup>   | 5.0×10 <sup>-1</sup>       | 9.6×10 <sup>5</sup>                                   | 1.6×10 <sup>-1</sup>          | 2.1×10 <sup>5</sup>                                  | <b>4.3×10<sup>-3</sup></b>   | 9.1                                                     | 7.3×10 <sup>-2</sup>            | 5.9×10 <sup>2</sup>              | 5.1×10 <sup>-1</sup>             |
| Y422G   | 4.0×10 <sup>1</sup>               | <b>2.1×10<sup>-3</sup></b> | 6.9×10 <sup>1</sup>   | 1.6×10 <sup>-1</sup>       | 8.7×10 <sup>5</sup>                                   | 1.4×10 <sup>-1</sup>          | 1.2×10 <sup>5</sup>                                  | <b>1.2×10<sup>-3</sup></b>   | 9.9                                                     | 7.3×10 <sup>-2</sup>            | 5.9×10 <sup>2</sup>              | 3.3×10 <sup>-1</sup>             |
| Y422V   | 1.6×10 <sup>2</sup>               | 1.3×10 <sup>-1</sup>       | 9.5×10 <sup>1</sup>   | 3.9×10 <sup>-1</sup>       | 1.6×10 <sup>6</sup>                                   | 7.1×10 <sup>-1</sup>          | 5.0×10 <sup>5</sup>                                  | 3.2×10 <sup>-1</sup>         | 1.9×10 <sup>1</sup>                                     | 5.5×10 <sup>-1</sup>            | 6.5×10 <sup>2</sup>              | 3.8×10 <sup>-1</sup>             |
| V423A   | 1.3×10 <sup>2</sup>               | 4.6×10 <sup>-1</sup>       | 8.8×10 <sup>1</sup>   | 7.8×10 <sup>-1</sup>       | 1.6×10 <sup>6</sup>                                   | 6.9×10 <sup>-1</sup>          | 3.7×10 <sup>5</sup>                                  | 5.7×10 <sup>-2</sup>         | 1.2×10 <sup>1</sup>                                     | 4.4×10 <sup>-1</sup>            | 6.3×10 <sup>2</sup>              | 4.6×10 <sup>-1</sup>             |
| V423G   | 4.1×10 <sup>1</sup>               | <b>1.7×10<sup>-3</sup></b> | 6.3×10 <sup>1</sup>   | 5.5×10 <sup>-2</sup>       | 6.3×10 <sup>5</sup>                                   | 3.1×10 <sup>-2</sup>          | 1.5×10 <sup>5</sup>                                  | <b>7.6×10<sup>-3</sup></b>   | 8.9                                                     | 1.2×10 <sup>-2</sup>            | 5.7×10 <sup>2</sup>              | 1.9×10 <sup>-1</sup>             |
| M424G   | 2.3×10 <sup>1</sup>               | <b>2.0×10<sup>-4</sup></b> | 5.3×10 <sup>1</sup>   | <b>9.6×10<sup>-3</sup></b> | 4.3×10 <sup>5</sup>                                   | <b>7.9×10<sup>-3</sup></b>    | 2.5×10 <sup>5</sup>                                  | 1.1×10 <sup>-2</sup>         | 5.6                                                     | <b>1.3×10<sup>-3</sup></b>      | 4.5×10 <sup>2</sup>              | <b>2.0×10<sup>-4</sup></b>       |
| M424V   | 1.1×10 <sup>2</sup>               | 6.9×10 <sup>-1</sup>       | 8.6×10 <sup>1</sup>   | 9.0×10 <sup>-1</sup>       | 1.2×10 <sup>6</sup>                                   | 4.6×10 <sup>-1</sup>          | 7.9×10 <sup>5</sup>                                  | 9.5×10 <sup>-2</sup>         | 1.2×10 <sup>1</sup>                                     | 3.9×10 <sup>-1</sup>            | 6.0×10 <sup>2</sup>              | 5.5×10 <sup>-1</sup>             |
| T425V   | 1.5×10 <sup>2</sup>               | 2.3×10 <sup>-1</sup>       | 8.0×10 <sup>1</sup>   | 6.7×10 <sup>-1</sup>       | 1.3×10 <sup>6</sup>                                   | 6.9×10 <sup>-1</sup>          | 5.4×10 <sup>5</sup>                                  | 5.7×10 <sup>-1</sup>         | 1.2×10 <sup>1</sup>                                     | 3.6×10 <sup>-1</sup>            | 6.3×10 <sup>2</sup>              | 5.4×10 <sup>-1</sup>             |
| E426G   | 9.5×10 <sup>1</sup>               | 2.5×10 <sup>-1</sup>       | 7.6×10 <sup>1</sup>   | 3.8×10 <sup>-1</sup>       | 1.3×10 <sup>6</sup>                                   | 6.7×10 <sup>-1</sup>          | 2.1×10 <sup>5</sup>                                  | <b>4.9×10<sup>-3</sup></b>   | 8.3                                                     | 1.6×10 <sup>-2</sup>            | 5.3×10 <sup>2</sup>              | <b>6.2×10<sup>-3</sup></b>       |
| E426V   | 1.6×10 <sup>2</sup>               | 5.5×10 <sup>-2</sup>       | 9.5×10 <sup>1</sup>   | 3.5×10 <sup>-1</sup>       | 1.8×10 <sup>6</sup>                                   | 2.8×10 <sup>-1</sup>          | 3.0×10 <sup>5</sup>                                  | <b>7.4×10<sup>-3</sup></b>   | 1.3×10 <sup>1</sup>                                     | 4.3×10 <sup>-1</sup>            | 6.5×10 <sup>2</sup>              | 3.2×10 <sup>-1</sup>             |
| L427G   | 1.4×10 <sup>1</sup>               | <b>2.0×10<sup>-4</sup></b> | 6.1×10 <sup>1</sup>   | 4.5×10 <sup>-2</sup>       | 2.5×10 <sup>5</sup>                                   | <b>2.4×10<sup>-3</sup></b>    | ≤ 9.2×10 <sup>4</sup>                                | <b>1.2×10<sup>-3</sup></b>   | 4.0                                                     | <b>4.0×10<sup>-4</sup></b>      | 5.0×10 <sup>2</sup>              | <b>2.4×10<sup>-3</sup></b>       |
| L427V   | 1.2×10 <sup>2</sup>               | 9.6×10 <sup>-1</sup>       | 8.8×10 <sup>1</sup>   | 8.0×10 <sup>-1</sup>       | 1.4×10 <sup>6</sup>                                   | 9.2×10 <sup>-1</sup>          | 2.2×10 <sup>5</sup>                                  | <b>9.0×10<sup>-4</sup></b>   | 1.1×10 <sup>1</sup>                                     | 2.0×10 <sup>-1</sup>            | 6.6×10 <sup>2</sup>              | 1.5×10 <sup>-1</sup>             |
| K428G   | 6.5×10 <sup>1</sup>               | 2.6×10 <sup>-2</sup>       | 6.8×10 <sup>1</sup>   | 1.4×10 <sup>-1</sup>       | 5.7×10 <sup>5</sup>                                   | 1.9×10 <sup>-2</sup>          | 2.6×10 <sup>5</sup>                                  | 2.7×10 <sup>-2</sup>         | 1.2×10 <sup>1</sup>                                     | 3.4×10 <sup>-1</sup>            | 6.3×10 <sup>2</sup>              | 6.6×10 <sup>-1</sup>             |
| K428V   | 7.3×10 <sup>1</sup>               | <b>7.6×10<sup>-3</sup></b> | 7.9×10 <sup>1</sup>   | 4.5×10 <sup>-1</sup>       | 8.7×10 <sup>5</sup>                                   | 3.6×10 <sup>-2</sup>          | 1.5×10 <sup>5</sup>                                  | <b>0</b>                     | 1.0×10 <sup>1</sup>                                     | 4.6×10 <sup>-2</sup>            | 5.6×10 <sup>2</sup>              | 3.3×10 <sup>-2</sup>             |
| K429G   | 1.3×10 <sup>2</sup>               | 4.4×10 <sup>-1</sup>       | 8.7×10 <sup>1</sup>   | 8.4×10 <sup>-1</sup>       | 1.4×10 <sup>6</sup>                                   | 9.9×10 <sup>-1</sup>          | 4.3×10 <sup>5</sup>                                  | 1.8×10 <sup>-1</sup>         | 1.5×10 <sup>1</sup>                                     | 7.8×10 <sup>-1</sup>            | 5.7×10 <sup>2</sup>              | 1.2×10 <sup>-1</sup>             |
| K429V   | 1.8×10 <sup>2</sup>               | <b>4.8×10<sup>-3</sup></b> | 9.4×10 <sup>1</sup>   | 3.3×10 <sup>-1</sup>       | 2.0×10 <sup>6</sup>                                   | 8.3×10 <sup>-2</sup>          | 2.1×10 <sup>5</sup>                                  | <b>5.6×10<sup>-3</sup></b>   | 1.7×10<                                                 |                                 |                                  |                                  |



| Variant | $k_{cat}$ cMUP (s <sup>-1</sup> ) | $k_{cat}$ cMUP $p$ -value  | $K_M$ cMUP ( $\mu$ M) | $K_M$ cMUP $p$ -value      | $k_{cat}/K_M$ cMUP (M <sup>-1</sup> s <sup>-1</sup> ) | $k_{cat}/K_M$ cMUP $p$ -value | $k_{cat}/K_M$ MeP (M <sup>-1</sup> s <sup>-1</sup> ) | $k_{cat}/K_M$ MeP $p$ -value | $k_{cat}/K_M$ MecMUP (M <sup>-1</sup> s <sup>-1</sup> ) | $k_{cat}/K_M$ MecMUP $p$ -value | $K_i$ PO <sub>4</sub> ( $\mu$ M) | $K_i$ PO <sub>4</sub> $p$ -value |
|---------|-----------------------------------|----------------------------|-----------------------|----------------------------|-------------------------------------------------------|-------------------------------|------------------------------------------------------|------------------------------|---------------------------------------------------------|---------------------------------|----------------------------------|----------------------------------|
| D440G   | 1.1×10 <sup>2</sup>               | 4.5×10 <sup>-1</sup>       | 7.7×10 <sup>1</sup>   | 6.0×10 <sup>-1</sup>       | 1.6×10 <sup>6</sup>                                   | 5.1×10 <sup>-1</sup>          | 3.1×10 <sup>5</sup>                                  | 2.1×10 <sup>-2</sup>         | 1.0×10 <sup>1</sup>                                     | 4.5×10 <sup>-2</sup>            | 5.4×10 <sup>2</sup>              | 1.7×10 <sup>-2</sup>             |
| D440V   | 2.2×10 <sup>1</sup>               | <b>2.0×10<sup>-4</sup></b> | 8.9×10 <sup>1</sup>   | 7.5×10 <sup>-1</sup>       | 2.9×10 <sup>5</sup>                                   | <b>2.1×10<sup>-3</sup></b>    | 1.1×10 <sup>5</sup>                                  | <b>6.6×10<sup>-3</sup></b>   | 4.8                                                     | 3.4×10 <sup>-2</sup>            | 6.2×10 <sup>2</sup>              | 8.3×10 <sup>-1</sup>             |
| E441G   | 8.4×10 <sup>1</sup>               | 1.1×10 <sup>-1</sup>       | 5.9×10 <sup>1</sup>   | 2.5×10 <sup>-2</sup>       | 1.2×10 <sup>6</sup>                                   | 6.1×10 <sup>-1</sup>          | 3.4×10 <sup>5</sup>                                  | 3.3×10 <sup>-2</sup>         | 1.6×10 <sup>1</sup>                                     | 9.3×10 <sup>-1</sup>            | 5.3×10 <sup>2</sup>              | 2.5×10 <sup>-2</sup>             |
| E441V   | 1.1×10 <sup>2</sup>               | 5.4×10 <sup>-1</sup>       | 9.9×10 <sup>1</sup>   | 1.1×10 <sup>-1</sup>       | 1.4×10 <sup>6</sup>                                   | 7.2×10 <sup>-1</sup>          | 4.0×10 <sup>5</sup>                                  | 2.2×10 <sup>-2</sup>         | 1.1×10 <sup>1</sup>                                     | 8.6×10 <sup>-2</sup>            | 6.8×10 <sup>2</sup>              | 2.6×10 <sup>-2</sup>             |
| I442G   | 7.0                               | <b>0</b>                   | 6.6×10 <sup>1</sup>   | 4.8×10 <sup>-2</sup>       | 1.6×10 <sup>5</sup>                                   | <b>0</b>                      | 4.6×10 <sup>4</sup>                                  | <b>1.1×10<sup>-3</sup></b>   | ≤ 9.9×10 <sup>-1</sup>                                  | <b>0</b>                        | 4.8×10 <sup>2</sup>              | <b>0</b>                         |
| I442V   | 1.0×10 <sup>2</sup>               | 3.9×10 <sup>-1</sup>       | 9.4×10 <sup>1</sup>   | 3.4×10 <sup>-1</sup>       | 1.1×10 <sup>6</sup>                                   | 4.7×10 <sup>-1</sup>          | 3.3×10 <sup>5</sup>                                  | 7.7×10 <sup>-2</sup>         | ≤ 6.5                                                   | 1.1×10 <sup>-1</sup>            | 6.5×10 <sup>2</sup>              | 4.6×10 <sup>-1</sup>             |
| W443G   | 1.3×10 <sup>2</sup>               | 7.9×10 <sup>-1</sup>       | 6.9×10 <sup>1</sup>   | 2.1×10 <sup>-1</sup>       | 1.5×10 <sup>6</sup>                                   | 8.9×10 <sup>-1</sup>          | 5.1×10 <sup>5</sup>                                  | 4.8×10 <sup>-1</sup>         | 2.1×10 <sup>1</sup>                                     | 2.2×10 <sup>-1</sup>            | 6.6×10 <sup>2</sup>              | 1.8×10 <sup>-1</sup>             |
| W443V   | 2.1×10 <sup>2</sup>               | <b>4.0×10<sup>-4</sup></b> | 9.8×10 <sup>1</sup>   | 2.1×10 <sup>-1</sup>       | 2.0×10 <sup>6</sup>                                   | 8.4×10 <sup>-2</sup>          | 3.3×10 <sup>5</sup>                                  | 3.2×10 <sup>-2</sup>         | 1.5×10 <sup>1</sup>                                     | 6.8×10 <sup>-1</sup>            | 6.7×10 <sup>2</sup>              | 1.3×10 <sup>-1</sup>             |
| E444G   | 1.4×10 <sup>2</sup>               | 4.3×10 <sup>-1</sup>       | 8.1×10 <sup>1</sup>   | 6.7×10 <sup>-1</sup>       | 1.5×10 <sup>6</sup>                                   | 9.3×10 <sup>-1</sup>          | 4.3×10 <sup>5</sup>                                  | 1.8×10 <sup>-1</sup>         | 2.0×10 <sup>1</sup>                                     | 3.0×10 <sup>-1</sup>            | 7.4×10 <sup>2</sup>              | <b>7.0×10<sup>-4</sup></b>       |
| E444V   | 1.5×10 <sup>2</sup>               | 2.3×10 <sup>-1</sup>       | 9.7×10 <sup>1</sup>   | 2.5×10 <sup>-1</sup>       | 1.5×10 <sup>6</sup>                                   | 9.3×10 <sup>-1</sup>          | 3.9×10 <sup>5</sup>                                  | 6.0×10 <sup>-2</sup>         | 7.6                                                     | 3.2×10 <sup>-2</sup>            | 7.4×10 <sup>2</sup>              | <b>2.1×10<sup>-3</sup></b>       |
| S445G   | 1.8×10 <sup>1</sup>               | <b>0</b>                   | 8.0×10 <sup>1</sup>   | 6.2×10 <sup>-1</sup>       | 2.3×10 <sup>5</sup>                                   | <b>2.2×10<sup>-3</sup></b>    | 9.9×10 <sup>4</sup>                                  | <b>6.1×10<sup>-3</sup></b>   | 3.7                                                     | <b>1.×10<sup>-4</sup></b>       | 6.2×10 <sup>2</sup>              | 8.2×10 <sup>-1</sup>             |
| S445V   | 1.3×10 <sup>2</sup>               | 7.1×10 <sup>-1</sup>       | 9.5×10 <sup>1</sup>   | 4.6×10 <sup>-1</sup>       | 1.5×10 <sup>6</sup>                                   | 9.1×10 <sup>-1</sup>          | 3.5×10 <sup>5</sup>                                  | 1.4×10 <sup>-1</sup>         | 1.4×10 <sup>1</sup>                                     | 5.8×10 <sup>-1</sup>            | 6.4×10 <sup>2</sup>              | 4.5×10 <sup>-1</sup>             |
| S446G   | 3.4×10 <sup>1</sup>               | <b>0</b>                   | 6.2×10 <sup>1</sup>   | 3.1×10 <sup>-2</sup>       | 5.1×10 <sup>5</sup>                                   | <b>6.9×10<sup>-3</sup></b>    | 1.5×10 <sup>5</sup>                                  | <b>3.1×10<sup>-3</sup></b>   | 4.5                                                     | <b>3.6×10<sup>-3</sup></b>      | 4.6×10 <sup>2</sup>              | <b>0</b>                         |
| S446V   | 2.0×10 <sup>2</sup>               | <b>1.×10<sup>-4</sup></b>  | 8.2×10 <sup>1</sup>   | 6.6×10 <sup>-1</sup>       | 2.1×10 <sup>6</sup>                                   | 1.9×10 <sup>-2</sup>          | 4.5×10 <sup>5</sup>                                  | 1.8×10 <sup>-1</sup>         | 2.2×10 <sup>1</sup>                                     | 2.0×10 <sup>-1</sup>            | 6.0×10 <sup>2</sup>              | 5.4×10 <sup>-1</sup>             |
| I447G   | 7.0×10 <sup>-1</sup>              | <b>0</b>                   | 4.7×10 <sup>1</sup>   | <b>9.0×10<sup>-4</sup></b> | 1.1×10 <sup>4</sup>                                   | <b>1.×10<sup>-4</sup></b>     | ≤ 1.6×10 <sup>3</sup>                                | <b>0</b>                     | ≤ 1.1                                                   | <b>0</b>                        | 3.4×10 <sup>2</sup>              | <b>0</b>                         |
| I447V   | 1.2×10 <sup>2</sup>               | 9.9×10 <sup>-1</sup>       | 9.0×10 <sup>1</sup>   | 6.2×10 <sup>-1</sup>       | 1.5×10 <sup>6</sup>                                   | 7.7×10 <sup>-1</sup>          | 5.9×10 <sup>5</sup>                                  | 9.4×10 <sup>-1</sup>         | 1.1×10 <sup>1</sup>                                     | 3.2×10 <sup>-1</sup>            | 6.8×10 <sup>2</sup>              | 1.4×10 <sup>-1</sup>             |
| P448G   | 5.1                               | <b>0</b>                   | 5.6×10 <sup>1</sup>   | <b>5.0×10<sup>-4</sup></b> | 7.6×10 <sup>4</sup>                                   | <b>0</b>                      | 1.6×10 <sup>4</sup>                                  | <b>1.×10<sup>-4</sup></b>    | ≤ 1.1                                                   | <b>0</b>                        | 4.8×10 <sup>2</sup>              | <b>0</b>                         |
| E449G   | 6.9×10 <sup>1</sup>               | 2.3×10 <sup>-2</sup>       | 6.6×10 <sup>1</sup>   | 7.6×10 <sup>-2</sup>       | 1.1×10 <sup>6</sup>                                   | 2.9×10 <sup>-1</sup>          | 3.3×10 <sup>5</sup>                                  | 3.1×10 <sup>-2</sup>         | 1.2×10 <sup>1</sup>                                     | 2.4×10 <sup>-1</sup>            | 3.9×10 <sup>2</sup>              | <b>1.×10<sup>-4</sup></b>        |
| E449V   | 8.2×10 <sup>1</sup>               | 3.3×10 <sup>-2</sup>       | 8.5×10 <sup>1</sup>   | 9.7×10 <sup>-1</sup>       | 1.1×10 <sup>6</sup>                                   | 2.8×10 <sup>-1</sup>          | 1.7×10 <sup>5</sup>                                  | <b>7.8×10<sup>-3</sup></b>   | 1.4×10 <sup>1</sup>                                     | 6.3×10 <sup>-1</sup>            | 5.1×10 <sup>2</sup>              | <b>5.0×10<sup>-3</sup></b>       |
| P450G   | 1.1×10 <sup>2</sup>               | 6.0×10 <sup>-1</sup>       | 6.9×10 <sup>1</sup>   | 1.6×10 <sup>-1</sup>       | 1.9×10 <sup>6</sup>                                   | 1.9×10 <sup>-1</sup>          | 3.7×10 <sup>5</sup>                                  | 6.7×10 <sup>-2</sup>         | 1.6×10 <sup>1</sup>                                     | 9.6×10 <sup>-1</sup>            | 6.4×10 <sup>2</sup>              | 4.7×10 <sup>-1</sup>             |
| P450V   | 1.6×10 <sup>2</sup>               | 1.2×10 <sup>-1</sup>       | 8.2×10 <sup>1</sup>   | 7.2×10 <sup>-1</sup>       | 1.9×10 <sup>6</sup>                                   | 2.4×10 <sup>-1</sup>          | 6.4×10 <sup>5</sup>                                  | 7.6×10 <sup>-1</sup>         | 1.5×10 <sup>1</sup>                                     | 7.2×10 <sup>-1</sup>            | 5.6×10 <sup>2</sup>              | 8.7×10 <sup>-2</sup>             |
| I451G   | 5.5                               | <b>0</b>                   | 4.6×10 <sup>1</sup>   | <b>0</b>                   | 1.2×10 <sup>5</sup>                                   | <b>0</b>                      | 1.1×10 <sup>4</sup>                                  | <b>3.1×10<sup>-3</sup></b>   | 3.0                                                     | <b>3.0×10<sup>-4</sup></b>      | 2.8×10 <sup>2</sup>              | <b>0</b>                         |
| I451V   | 8.3×10 <sup>1</sup>               | 3.5×10 <sup>-2</sup>       | 9.0×10 <sup>1</sup>   | 5.9×10 <sup>-1</sup>       | 1.0×10 <sup>6</sup>                                   | 1.6×10 <sup>-1</sup>          | 4.7×10 <sup>5</sup>                                  | 8.5×10 <sup>-2</sup>         | 8.5                                                     | 1.1×10 <sup>-2</sup>            | 5.6×10 <sup>2</sup>              | 5.6×10 <sup>-2</sup>             |
| K452G   | 1.3×10 <sup>1</sup>               | <b>0</b>                   | 6.0×10 <sup>1</sup>   | 2.0×10 <sup>-2</sup>       | 2.0×10 <sup>5</sup>                                   | <b>5.0×10<sup>-4</sup></b>    | 3.1×10 <sup>4</sup>                                  | <b>0</b>                     | 1.9                                                     | <b>2.0×10<sup>-4</sup></b>      | 4.7×10 <sup>2</sup>              | <b>0</b>                         |
| K452V   | 1.2×10 <sup>1</sup>               | <b>0</b>                   | 8.2×10 <sup>1</sup>   | 7.0×10 <sup>-1</sup>       | 1.5×10 <sup>5</sup>                                   | <b>5.0×10<sup>-4</sup></b>    | 2.5×10 <sup>4</sup>                                  | <b>1.×10<sup>-4</sup></b>    | ≤ 9.3×10 <sup>-1</sup>                                  | <b>6.0×10<sup>-4</sup></b>      | 5.0×10 <sup>2</sup>              | <b>6.6×10<sup>-3</sup></b>       |
| S453G   | 8.9×10 <sup>1</sup>               | 1.4×10 <sup>-1</sup>       | 6.3×10 <sup>1</sup>   | 4.3×10 <sup>-2</sup>       | 1.5×10 <sup>6</sup>                                   | 9.1×10 <sup>-1</sup>          | 7.3×10 <sup>5</sup>                                  | 3.2×10 <sup>-1</sup>         | 1.3×10 <sup>1</sup>                                     | 4.0×10 <sup>-1</sup>            | 4.4×10 <sup>2</sup>              | <b>1.×10<sup>-4</sup></b>        |
| S453V   | 1.2×10 <sup>2</sup>               | 7.4×10 <sup>-1</sup>       | 8.0×10 <sup>1</sup>   | 6.4×10 <sup>-1</sup>       | 1.5×10 <sup>6</sup>                                   | 8.2×10 <sup>-1</sup>          | 1.4×10 <sup>5</sup>                                  | <b>1.9×10<sup>-3</sup></b>   | 1.5×10 <sup>1</sup>                                     | 7.7×10 <sup>-1</sup>            | 5.6×10 <sup>2</sup>              | 1.2×10 <sup>-1</sup>             |
| R454G   | 5.0                               | <b>0</b>                   | 6.5×10 <sup>1</sup>   | 1.6×10 <sup>-2</sup>       | 8.3×10 <sup>4</sup>                                   | <b>0</b>                      | 6.7×10 <sup>3</sup>                                  | <b>0</b>                     | ≤ 9.9×10 <sup>-1</sup>                                  | <b>0</b>                        | 5.2×10 <sup>2</sup>              | <b>7.0×10<sup>-4</sup></b>       |
| R454V   | 5.8                               | <b>0</b>                   | 6.4×10 <sup>1</sup>   | <b>3.1×10<sup>-3</sup></b> | 8.1×10 <sup>4</sup>                                   | <b>0</b>                      | 1.2×10 <sup>4</sup>                                  | <b>0</b>                     | ≤ 1.3                                                   | <b>1.×10<sup>-4</sup></b>       | 3.6×10 <sup>2</sup>              | <b>0</b>                         |
| V455A   | 1.3×10 <sup>2</sup>               | 5.6×10 <sup>-1</sup>       | 8.2×10 <sup>1</sup>   | 7.7×10 <sup>-1</sup>       | 1.7×10 <sup>6</sup>                                   | 4.1×10 <sup>-1</sup>          | 1.6×10 <sup>5</sup>                                  | <b>5.0×10<sup>-4</sup></b>   | 8.6                                                     | 6.4×10 <sup>-2</sup>            | 6.8×10 <sup>2</sup>              | 5.3×10 <sup>-2</sup>             |
| V455G   | 1.3×10 <sup>1</sup>               | <b>0</b>                   | 5.9×10 <sup>1</sup>   | <b>4.1×10<sup>-3</sup></b> | 2.0×10 <sup>5</sup>                                   | <b>1.×10<sup>-4</sup></b>     | 2.1×10 <sup>4</sup>                                  | <b>0</b>                     | 1.1                                                     | <b>1.1×10<sup>-3</sup></b>      | 5.2×10 <sup>2</sup>              | <b>2.0×10<sup>-4</sup></b>       |
| I456G   | 1.2×10 <sup>1</sup>               | <b>0</b>                   | 4.7×10 <sup>1</sup>   | <b>0</b>                   | 2.4×10 <sup>5</sup>                                   | <b>0</b>                      | 3.4×10 <sup>4</sup>                                  | <b>0</b>                     | 1.6                                                     | <b>0</b>                        | 3.5×10 <sup>2</sup>              | <b>0</b>                         |
| I456V   | 1.2×10 <sup>2</sup>               | 7.0×10 <sup>-1</sup>       | 8.9×10 <sup>1</sup>   | 5.4×10 <sup>-1</sup>       | 1.2×10 <sup>6</sup>                                   | 3.0×10 <sup>-1</sup>          | 5.2×10 <sup>5</sup>                                  | 2.2×10 <sup>-1</sup>         | 8.8                                                     | 2.6×10 <sup>-2</sup>            | 6.4×10 <sup>2</sup>              | 2.6×10 <sup>-1</sup>             |
| N457G   | 3.3×10 <sup>1</sup>               | <b>0</b>                   | 6.6×10 <sup>1</sup>   | 5.1×10 <sup>-2</sup>       | 5.4×10 <sup>5</sup>                                   | <b>4.4×10<sup>-3</sup></b>    | 1.2×10 <sup>5</sup>                                  | <b>1.0×10<sup>-3</sup></b>   | 4.9                                                     | <b>2.0×10<sup>-4</sup></b>      | 5.5×10 <sup>2</sup>              | 1.8×10 <sup>-2</sup>             |
| N457V   | 1.3×10 <sup>1</sup>               | <b>0</b>                   | 6.0×10 <sup>1</sup>   | <b>1.7×10<sup>-3</sup></b> | 1.8×10 <sup>5</sup>                                   | <b>0</b>                      | 8.6×10 <sup>3</sup>                                  | <b>6.0×10<sup>-4</sup></b>   | 2.4                                                     | <b>1.0×10<sup>-3</sup></b>      | 4.1×10 <sup>2</sup>              | <b>0</b>                         |
| G458A   | 1.4×10 <sup>1</sup>               | <b>5.0×10<sup>-4</sup></b> | 5.4×10 <sup>1</sup>   | <b>9.8×10<sup>-3</sup></b> | 2.6×10 <sup>5</sup>                                   | <b>2.2×10<sup>-3</sup></b>    | 1.4×10 <sup>5</sup>                                  | 1.5×10 <sup>-2</sup>         | 7.8                                                     | <b>3.1×10<sup>-3</sup></b>      | 3.0×10 <sup>2</sup>              | <b>1.×10<sup>-4</sup></b>        |
| G458V   | 9.4                               | <b>0</b>                   | 2.9×10 <sup>1</sup>   | <b>0</b>                   | 3.2×10 <sup>5</sup>                                   | <b>1.×10<sup>-4</sup></b>     | 2.1×10 <sup>4</sup>                                  | <b>7.2×10<sup>-3</sup></b>   | 2.3                                                     | <b>5.0×10<sup>-4</sup></b>      | 2.0×10 <sup>2</sup>              | <b>0</b>                         |
| Y459G   | 1.4                               | <b>0</b>                   | 6.2×10 <sup>1</sup>   | 2.2×10 <sup>-2</sup>       | 2.2×10 <sup>4</sup>                                   | <b>0</b>                      | ≤ 1.8×10 <sup>3</sup>                                | <b>0</b>                     | ≤ 1.1                                                   | <b>0</b>                        | 5.4×10 <sup>2</sup>              | 1.7×10 <sup>-2</sup>             |
| Y459V   | 3.8×10 <sup>1</sup>               | <b>1.2×10<sup>-3</sup></b> | 8.8×10 <sup>1</sup>   | 8.3×10 <sup>-1</sup>       | 5.6×10 <sup>5</sup>                                   | 2.1×10 <sup>-2</sup>          | 9.0×10 <sup>4</sup>                                  | <b>1.3×10<sup>-3</sup></b>   | 3.9                                                     | <b>1.4×10<sup>-3</sup></b>      | 6.0×10 <sup>2</sup>              | 6.0×10 <sup>-1</sup>             |
| N460V   | 3.1×10 <sup>1</sup>               | <b>5.3×10<sup>-3</sup></b> | 9.4×10 <sup>1</sup>   | 4.9×10 <sup>-1</sup>       | 3.2×10 <sup>5</sup>                                   | 1.1×10 <sup>-2</sup>          | 1.4×10 <sup>5</sup>                                  | 2.5×10 <sup>-2</sup>         | ≤ 1.9                                                   | <b>3.0×10<sup>-4</sup></b>      | 5.8×10 <sup>2</sup>              | 2.1×10 <sup>-1</sup>             |
| W461G   | 1.0×10 <sup>1</sup>               | <b>1.×10<sup>-4</sup></b>  | 4.4×10 <sup>1</sup>   | <b>1.7×10<sup>-3</sup></b> | 1.8×10 <sup>5</sup>                                   | <b>1.4×10<sup>-3</sup></b>    | 1.3×10 <sup>5</sup>                                  | <b>1.7×10<sup>-3</sup></b>   | 5.0                                                     | <b>9.0×10<sup>-4</sup></b>      | 4.2×10 <sup>2</sup>              | <b>6.0×10<sup>-4</sup></b>       |
| W461V   | 1.1×10 <sup>1</sup>               | <b>2.9×10<sup>-3</sup></b> | 6.4×10 <sup>1</sup>   | 1.4×10 <sup>-1</sup>       | 1.7×10 <sup>5</sup>                                   | <b>5.5×10<sup>-3</sup></b>    | 1.3×10 <sup>5</sup>                                  | <b>0</b>                     | 3.8                                                     | 2.2×10 <sup>-2</sup>            | 4.4×10 <sup>2</sup>              | <b>0</b>                         |
| K462G   | 1.1×10 <sup>2</sup>               | 6.3×10 <sup>-1</sup>       | 8.0×10 <sup>1</sup>   | 5.9×10 <sup>-1</sup>       | 1.8×10 <sup>6</sup>                                   | 2.2×10 <sup>-1</sup>          | 3.1×10 <sup>5</sup>                                  | 2.8×10 <sup>-2</sup>         | 2.1×10 <sup>1</sup>                                     | 1.8×10 <sup>-1</sup>            | 6.4×10 <sup>2</sup>              | 2.4×10 <sup>-1</sup>             |
| K462V   | 7.2×10 <sup>1</sup>               | 9.3×10 <sup>-2</sup>       | 7.8×10 <sup>1</sup>   | 5.8×10 <sup>-1</sup>       | 9.2×10 <sup>5</sup>                                   | 2.3×10 <sup>-1</sup>          | 4.4×10 <sup>5</sup>                                  | 1.0×10 <sup>-1</sup>         | 8.1                                                     | 4.5×10 <sup>-2</sup>            | 6.2×10 <sup>2</sup>              | 8.6×10 <sup>-1</sup>             |
| R463G   | 6.1                               | <b>0</b>                   | 3.2×10 <sup>1</sup>   | <b>0</b>                   | 2.5×10 <sup>5</sup>                                   | <b>0</b>                      | 2.6×10 <sup>4</sup>                                  | <b>0</b>                     | 1.5                                                     | <b>1.×10<sup>-4</sup></b>       | 6.7×10 <sup>2</sup>              | 9.9×10 <sup>-2</sup>             |
| R463V   | 3.5×10 <sup>1</sup>               | <b>0</b>                   | 8.4×10 <sup>1</sup>   | 8.5×10 <sup>-1</sup>       | 4.5×10 <sup>5</sup>                                   | <b>1.7×10<sup>-3</sup></b>    | 1.2×10 <sup>5</sup>                                  | <b>1.2×10<sup>-3</sup></b>   | 3.3                                                     | <b>9.0×10<sup>-4</sup></b>      | 5.2×10 <sup>2</sup>              | <b>3.8×10<sup>-3</sup></b>       |
| S464G   | 7.9×10 <sup>1</sup>               | 2.0×10 <sup>-1</sup>       | 5.0×10 <sup>1</sup>   | 3.5×10 <sup>-2</sup>       | 1.6×10 <sup>6</sup>                                   | 7.7×10 <sup>-1</sup>          | 5.7×10 <sup>5</sup>                                  | 7.4×10 <sup>-1</sup>         | 1.4×10 <sup>1</sup>                                     | 6.7×10 <sup>-1</sup>            | 4.5×10 <sup>2</sup>              | <b>1.7×10<sup>-3</sup></b>       |
| S464V   | -                                 | -                          | -                     | -                          | ≤ 3.0×10 <sup>4</sup>                                 | <b>0</b>                      | ≤ 1.6×10 <sup>4</sup>                                | <b>0</b>                     | ≤ 2.2                                                   | <b>1.8×10<sup>-3</sup></b>      | -                                | -                                |
| G465A   | 1.2×10 <sup>1</sup>               | <b>0</b>                   | 3.7×10 <sup>1</sup>   | <b>3.0×10<sup>-4</sup></b> | 2.4×10 <sup>5</sup>                                   | <b>1.5×10<sup>-3</sup></b>    | 8.8×10 <sup>4</sup>                                  | <b>0</b>                     | 2.9                                                     | <b>1.7×10<sup>-3</sup></b>      | 4.1×10 <sup>2</sup>              | <b>0</b>                         |
| G465V   | 7.2×10 <sup>-2</sup>              | <b>1.×10<sup>-4</sup></b>  | 8.9                   | <b>0</b>                   | 6.4×10 <sup>3</sup>                                   | <b>6.0×10<sup>-4</sup></b>    | ≤ 5.7×10 <sup>2</sup>                                | <b>0</b>                     | ≤ 1.3                                                   | <b>0</b>                        | 6.4×10 <sup>1</sup>              | <b>4.0×10<sup>-4</sup></b>       |
| D466G   | 3.2×10 <sup>1</sup>               | <b>0</b>                   | 7.7×10 <sup>1</sup>   | 4.1×10 <sup>-1</sup>       | 5.2×10 <sup>5</sup>                                   | <b>7.3×10<sup>-3</sup></b>    | 7.2×10 <sup>4</sup>                                  | <b>1.0×10<sup>-3</sup></b>   | 5.6                                                     | <b>6.0×10<sup>-4</sup></b>      | 6.7×10 <sup>2</sup>              | 5.7×10 <sup>-2</sup>             |
| D466V   | 8.5×10 <sup>1</sup>               | 8.5×10 <sup>-2</sup>       | 9.4×10 <sup>1</sup>   | 3.9×10 <sup>-1</sup>       | 1.0×10 <sup>6</sup>                                   | 2.3×10 <sup>-1</sup>          | 3.7×10 <sup>4</sup>                                  | <b>0</b>                     | 5.1                                                     | <b>3.0×10<sup>-3</sup></b>      | 7.2×10 <sup>2</sup>              | <b>5.1×10<sup>-3</sup></b>       |
| I467G   | 2.2×10 <sup>1</sup>               | <b>2.0×10<sup>-4</sup></b> | 7.1×10 <sup>1</sup>   | 1.7×10 <sup>-1</sup>       | 3.1×10 <sup>5</sup>                                   | <b>1.3×10<sup>-3</sup></b>    | 4.7×10 <sup>4</sup>                                  | <b>0</b>                     | 1.7                                                     | <b>4.0×10<sup>-4</sup></b>      | 6.2×10 <sup>2</sup>              | 7.9×10 <sup>-1</sup>             |
| I467V   | 7.3×10 <sup>1</sup>               | 2.1×10 <sup>-2</sup>       | 8.7×10 <sup>1</sup>   | 9.0×10 <sup>-1</sup>       | 9.4×10 <sup>5</sup>                                   | 1.4×10 <sup>-1</sup>          | 4.9×10 <sup>5</sup>                                  | 2.7×10 <sup>-1</sup>         | 7.7                                                     | 1.5×10 <sup>-2</sup>            | 6.2×10 <sup>2</sup>              | 9.6×10 <sup>-1</sup>             |
| Q468G   | 2.1×10 <sup>2</sup>               | <b>1.3×10<sup>-3</sup></b> | 8.2×10 <sup>1</sup>   | 7.1×10 <sup>-1</sup>       | 2.3×10 <sup>6</sup>                                   | 1.7×10 <sup>-2</sup>          | 4.0×10 <sup>5</sup>                                  | 8.6×10 <sup>-2</sup>         | 1.7×10 <sup>1</sup>                                     | 7.4×10 <sup>-1</sup>            | 6.6×10 <sup>2</sup>              | 1.2×10 <sup>-1</sup>             |
| Q468V   | 5.0×10 <sup>1</sup>               | <b>9.0×10<sup>-4</sup></b> | 7.2×10 <sup>1</sup>   | 1.6×10 <sup>-1</sup>       | 6.0×10 <sup>5</sup>                                   | <b>5.6×10<sup>-3</sup></b>    | 3.9×10 <sup>5</sup>                                  | 3.6×10 <sup>-2</sup>         | 5.0                                                     | <b>3.4×10<sup>-3</sup></b>      | 7.8×10 <sup>2</sup>              | <b>2.8×10<sup>-3</sup></b>       |
| I469G   | 1.0×10 <sup>2</sup>               | 4.0×10 <sup>-1</sup>       | 7.7×10 <sup>1</sup>   | 5.0×10 <sup>-1</sup>       | 1.3×10 <sup>6</sup>                                   | 8.1×10 <sup>-1</sup>          | 1.1×10 <sup>5</sup>                                  | <b>4.6×10<sup>-3</sup></b>   | 7.5                                                     | <b>7.4×10<sup>-3</sup></b>      | 6.4×10 <sup>2</sup>              | 3.7×10 <sup>-1</sup>             |
| I469V   | 7.1×10 <sup>1</sup>               | 2.9×10 <sup>-2</sup>       | 8.5×10 <sup>1</sup>   | 9.3×10 <sup>-1</sup>       | 8.1×10 <sup>5</sup>                                   | 6.9×10 <sup>-2</sup>          | 5.6×10                                               |                              |                                                         |                                 |                                  |                                  |



| Variant | $k_{cat}$ cMUP (s <sup>-1</sup> ) | $k_{cat}$ cMUP $p$ -value  | $K_M$ cMUP ( $\mu$ M) | $K_M$ cMUP $p$ -value      | $k_{cat}/K_M$ cMUP (M <sup>-1</sup> s <sup>-1</sup> ) | $k_{cat}/K_M$ cMUP $p$ -value | $k_{cat}/K_M$ MeP (M <sup>-1</sup> s <sup>-1</sup> ) | $k_{cat}/K_M$ MeP $p$ -value | $k_{cat}/K_M$ MecMUP (M <sup>-1</sup> s <sup>-1</sup> ) | $k_{cat}/K_M$ MecMUP $p$ -value | $K_i$ PO <sub>4</sub> ( $\mu$ M) | $K_i$ PO <sub>4</sub> $p$ -value |
|---------|-----------------------------------|----------------------------|-----------------------|----------------------------|-------------------------------------------------------|-------------------------------|------------------------------------------------------|------------------------------|---------------------------------------------------------|---------------------------------|----------------------------------|----------------------------------|
| A478V   | 1.0×10 <sup>2</sup>               | 3.0×10 <sup>-1</sup>       | 9.0×10 <sup>1</sup>   | 6.3×10 <sup>-1</sup>       | 1.1×10 <sup>6</sup>                                   | 3.8×10 <sup>-1</sup>          | 3.1×10 <sup>5</sup>                                  | 3.0×10 <sup>-2</sup>         | 6.2                                                     | 1.1×10 <sup>-2</sup>            | 6.7×10 <sup>2</sup>              | 1.2×10 <sup>-1</sup>             |
| Y479G   | 1.7×10 <sup>2</sup>               | 2.1×10 <sup>-1</sup>       | 7.3×10 <sup>1</sup>   | 4.4×10 <sup>-1</sup>       | 2.4×10 <sup>6</sup>                                   | 6.6×10 <sup>-2</sup>          | 1.1×10 <sup>6</sup>                                  | <b>8.4×10<sup>-3</sup></b>   | 1.2×10 <sup>1</sup>                                     | 1.6×10 <sup>-1</sup>            | 5.3×10 <sup>2</sup>              | 1.4×10 <sup>-2</sup>             |
| Y479V   | 1.3×10 <sup>2</sup>               | 4.7×10 <sup>-1</sup>       | 1.2×10 <sup>2</sup>   | <b>5.0×10<sup>-4</sup></b> | 1.1×10 <sup>6</sup>                                   | 3.4×10 <sup>-1</sup>          | 7.1×10 <sup>5</sup>                                  | 2.7×10 <sup>-1</sup>         | 5.3                                                     | <b>3.0×10<sup>-4</sup></b>      | 6.4×10 <sup>2</sup>              | 2.8×10 <sup>-1</sup>             |
| S480G   | 1.1×10 <sup>2</sup>               | 4.6×10 <sup>-1</sup>       | 6.3×10 <sup>1</sup>   | 6.3×10 <sup>-2</sup>       | 1.6×10 <sup>6</sup>                                   | 5.6×10 <sup>-1</sup>          | 4.8×10 <sup>5</sup>                                  | 2.4×10 <sup>-1</sup>         | 2.5×10 <sup>1</sup>                                     | <b>4.4×10<sup>-3</sup></b>      | 4.1×10 <sup>2</sup>              | <b>3.0×10<sup>-4</sup></b>       |
| S480V   | 1.4×10 <sup>2</sup>               | 3.3×10 <sup>-1</sup>       | 1.3×10 <sup>2</sup>   | <b>7.0×10<sup>-4</sup></b> | 9.6×10 <sup>5</sup>                                   | 1.6×10 <sup>-1</sup>          | 7.6×10 <sup>5</sup>                                  | 2.2×10 <sup>-1</sup>         | 5.6                                                     | 5.1×10 <sup>-2</sup>            | 7.2×10 <sup>2</sup>              | <b>8.7×10<sup>-3</sup></b>       |
| K481G   | 1.1×10 <sup>2</sup>               | 5.9×10 <sup>-1</sup>       | 8.3×10 <sup>1</sup>   | 8.7×10 <sup>-1</sup>       | 1.8×10 <sup>6</sup>                                   | 2.8×10 <sup>-1</sup>          | 6.3×10 <sup>5</sup>                                  | 8.5×10 <sup>-1</sup>         | 1.6×10 <sup>1</sup>                                     | 8.6×10 <sup>-1</sup>            | 6.0×10 <sup>2</sup>              | 5.7×10 <sup>-1</sup>             |
| K481V   | 1.3×10 <sup>2</sup>               | 7.9×10 <sup>-1</sup>       | 1.1×10 <sup>2</sup>   | 8.1×10 <sup>-2</sup>       | 1.3×10 <sup>6</sup>                                   | 7.5×10 <sup>-1</sup>          | 5.1×10 <sup>5</sup>                                  | 4.2×10 <sup>-1</sup>         | 1.1×10 <sup>1</sup>                                     | 2.6×10 <sup>-1</sup>            | 6.8×10 <sup>2</sup>              | 7.4×10 <sup>-2</sup>             |
| K482G   | 7.8×10 <sup>1</sup>               | 4.6×10 <sup>-2</sup>       | 7.8×10 <sup>1</sup>   | 4.2×10 <sup>-1</sup>       | 1.1×10 <sup>6</sup>                                   | 3.6×10 <sup>-1</sup>          | 3.5×10 <sup>5</sup>                                  | 4.7×10 <sup>-2</sup>         | 7.2                                                     | <b>4.6×10<sup>-3</sup></b>      | 4.8×10 <sup>2</sup>              | <b>0</b>                         |
| K482V   | 1.3×10 <sup>2</sup>               | 6.2×10 <sup>-1</sup>       | 9.4×10 <sup>1</sup>   | 4.4×10 <sup>-1</sup>       | 1.4×10 <sup>6</sup>                                   | 9.4×10 <sup>-1</sup>          | 5.7×10 <sup>5</sup>                                  | 7.3×10 <sup>-1</sup>         | 1.1×10 <sup>1</sup>                                     | 1.3×10 <sup>-1</sup>            | 6.3×10 <sup>2</sup>              | 4.7×10 <sup>-1</sup>             |
| G483A   | 3.6×10 <sup>1</sup>               | <b>3.0×10<sup>-4</sup></b> | 6.0×10 <sup>1</sup>   | 1.7×10 <sup>-2</sup>       | 4.7×10 <sup>5</sup>                                   | <b>5.5×10<sup>-3</sup></b>    | 1.1×10 <sup>5</sup>                                  | <b>0</b>                     | 7.4                                                     | <b>9.0×10<sup>-4</sup></b>      | 3.1×10 <sup>2</sup>              | <b>1.×10<sup>-4</sup></b>        |
| G483V   | 3.1×10 <sup>1</sup>               | <b>9.8×10<sup>-3</sup></b> | 3.7×10 <sup>1</sup>   | <b>9.5×10<sup>-3</sup></b> | 9.4×10 <sup>5</sup>                                   | 3.5×10 <sup>-1</sup>          | 1.5×10 <sup>5</sup>                                  | <b>2.6×10<sup>-3</sup></b>   | 3.5                                                     | <b>5.0×10<sup>-4</sup></b>      | 2.0×10 <sup>2</sup>              | <b>2.0×10<sup>-4</sup></b>       |
| T484G   | 6.9×10 <sup>1</sup>               | 4.0×10 <sup>-2</sup>       | 5.0×10 <sup>1</sup>   | <b>4.4×10<sup>-3</sup></b> | 1.6×10 <sup>6</sup>                                   | 6.7×10 <sup>-1</sup>          | 2.7×10 <sup>5</sup>                                  | 1.2×10 <sup>-2</sup>         | 7.5                                                     | <b>2.0×10<sup>-3</sup></b>      | 2.8×10 <sup>2</sup>              | <b>0</b>                         |
| T484V   | 8.7×10 <sup>1</sup>               | 4.5×10 <sup>-2</sup>       | 1.0×10 <sup>2</sup>   | 9.3×10 <sup>-2</sup>       | 8.4×10 <sup>5</sup>                                   | 5.0×10 <sup>-2</sup>          | 3.5×10 <sup>5</sup>                                  | 4.1×10 <sup>-2</sup>         | 9.1                                                     | 2.0×10 <sup>-2</sup>            | 5.6×10 <sup>2</sup>              | 6.7×10 <sup>-2</sup>             |
| T485G   | 9.6×10 <sup>1</sup>               | 1.9×10 <sup>-1</sup>       | 6.8×10 <sup>1</sup>   | 1.0×10 <sup>-1</sup>       | 1.3×10 <sup>6</sup>                                   | 6.2×10 <sup>-1</sup>          | 4.4×10 <sup>5</sup>                                  | 2.1×10 <sup>-1</sup>         | 2.0×10 <sup>1</sup>                                     | 3.0×10 <sup>-1</sup>            | 4.0×10 <sup>2</sup>              | <b>1.×10<sup>-4</sup></b>        |
| T485V   | 7.2×10 <sup>1</sup>               | 2.6×10 <sup>-2</sup>       | 1.2×10 <sup>2</sup>   | <b>6.4×10<sup>-3</sup></b> | 6.6×10 <sup>5</sup>                                   | 2.2×10 <sup>-2</sup>          | 5.1×10 <sup>5</sup>                                  | 4.4×10 <sup>-1</sup>         | ≤ 1.4                                                   | <b>7.0×10<sup>-4</sup></b>      | 4.0×10 <sup>2</sup>              | <b>0</b>                         |
| H486G   | 6.6                               | <b>0</b>                   | 1.6×10 <sup>2</sup>   | <b>0</b>                   | 4.3×10 <sup>4</sup>                                   | <b>0</b>                      | ≤ 1.2×10 <sup>3</sup>                                | <b>1.×10<sup>-4</sup></b>    | ≤ 1.1                                                   | <b>0</b>                        | -                                | -                                |
| H486V   | 6.9×10 <sup>-1</sup>              | <b>4.7×10<sup>-3</sup></b> | 9.9×10 <sup>1</sup>   | 4.0×10 <sup>-1</sup>       | 6.9×10 <sup>3</sup>                                   | <b>9.7×10<sup>-3</sup></b>    | ≤ 9.6×10 <sup>2</sup>                                | <b>7.0×10<sup>-4</sup></b>   | ≤ 1.3                                                   | <b>5.0×10<sup>-4</sup></b>      | -                                | -                                |
| S487G   | 9.0×10 <sup>1</sup>               | 2.1×10 <sup>-1</sup>       | 4.8×10 <sup>1</sup>   | 1.1×10 <sup>-2</sup>       | 1.3×10 <sup>6</sup>                                   | 7.5×10 <sup>-1</sup>          | ≤ 4.1×10 <sup>5</sup>                                | 4.1×10 <sup>-1</sup>         | 4.9×10 <sup>1</sup>                                     | <b>0</b>                        | 3.9×10 <sup>2</sup>              | <b>2.0×10<sup>-4</sup></b>       |
| S487V   | 1.6×10 <sup>2</sup>               | 2.9×10 <sup>-2</sup>       | 9.4×10 <sup>1</sup>   | 2.9×10 <sup>-1</sup>       | 1.7×10 <sup>6</sup>                                   | 3.5×10 <sup>-1</sup>          | 1.8×10 <sup>5</sup>                                  | <b>4.0×10<sup>-4</sup></b>   | ≤ 7.7×10 <sup>-1</sup>                                  | <b>1.×10<sup>-4</sup></b>       | 1.0×10 <sup>3</sup>              | <b>1.×10<sup>-4</sup></b>        |
| V488A   | 2.5×10 <sup>2</sup>               | <b>4.0×10<sup>-4</sup></b> | 8.6×10 <sup>1</sup>   | 9.2×10 <sup>-1</sup>       | 3.2×10 <sup>6</sup>                                   | <b>3.0×10<sup>-4</sup></b>    | 8.3×10 <sup>5</sup>                                  | 7.4×10 <sup>-2</sup>         | 2.9×10 <sup>1</sup>                                     | <b>3.0×10<sup>-4</sup></b>      | 5.7×10 <sup>2</sup>              | 3.3×10 <sup>-1</sup>             |
| V488G   | 1.5×10 <sup>2</sup>               | 1.0×10 <sup>-1</sup>       | 5.8×10 <sup>1</sup>   | 1.2×10 <sup>-2</sup>       | 2.8×10 <sup>6</sup>                                   | <b>1.×10<sup>-4</sup></b>     | 4.9×10 <sup>5</sup>                                  | 3.2×10 <sup>-1</sup>         | 6.2×10 <sup>1</sup>                                     | <b>1.×10<sup>-4</sup></b>       | 3.6×10 <sup>2</sup>              | <b>0</b>                         |
| W489G   | 7.5                               | <b>0</b>                   | 2.5×10 <sup>1</sup>   | <b>0</b>                   | 3.6×10 <sup>5</sup>                                   | <b>2.0×10<sup>-4</sup></b>    | 6.8×10 <sup>4</sup>                                  | <b>0</b>                     | 7.7                                                     | <b>1.7×10<sup>-3</sup></b>      | 1.2×10 <sup>2</sup>              | <b>0</b>                         |
| W489V   | 3.5×10 <sup>1</sup>               | <b>2.0×10<sup>-4</sup></b> | 5.9×10 <sup>1</sup>   | 1.8×10 <sup>-2</sup>       | 6.2×10 <sup>5</sup>                                   | 1.8×10 <sup>-2</sup>          | 1.4×10 <sup>4</sup>                                  | <b>0</b>                     | ≤ 2.4                                                   | <b>2.6×10<sup>-3</sup></b>      | 3.0×10 <sup>2</sup>              | <b>2.0×10<sup>-4</sup></b>       |
| N490G   | 1.0×10 <sup>2</sup>               | 4.3×10 <sup>-1</sup>       | 6.0×10 <sup>1</sup>   | 2.4×10 <sup>-2</sup>       | 1.8×10 <sup>6</sup>                                   | 2.7×10 <sup>-1</sup>          | 2.1×10 <sup>5</sup>                                  | <b>4.8×10<sup>-3</sup></b>   | 2.1×10 <sup>1</sup>                                     | 1.6×10 <sup>-1</sup>            | 4.4×10 <sup>2</sup>              | <b>1.×10<sup>-4</sup></b>        |
| N490V   | 6.3×10 <sup>1</sup>               | <b>2.3×10<sup>-3</sup></b> | 7.6×10 <sup>1</sup>   | 2.5×10 <sup>-1</sup>       | 1.0×10 <sup>6</sup>                                   | 1.2×10 <sup>-1</sup>          | 1.8×10 <sup>5</sup>                                  | <b>0</b>                     | 9.9                                                     | 7.6×10 <sup>-2</sup>            | 4.9×10 <sup>2</sup>              | <b>0</b>                         |
| S491G   | 5.6×10 <sup>1</sup>               | 1.1×10 <sup>-2</sup>       | 6.3×10 <sup>1</sup>   | 4.8×10 <sup>-2</sup>       | 8.9×10 <sup>5</sup>                                   | 1.4×10 <sup>-1</sup>          | 2.7×10 <sup>5</sup>                                  | 1.1×10 <sup>-2</sup>         | 8.0                                                     | <b>4.4×10<sup>-3</sup></b>      | 5.3×10 <sup>2</sup>              | <b>6.5×10<sup>-3</sup></b>       |
| S491V   | 5.5×10 <sup>1</sup>               | <b>1.9×10<sup>-3</sup></b> | 6.4×10 <sup>1</sup>   | 2.6×10 <sup>-2</sup>       | 1.0×10 <sup>6</sup>                                   | 1.6×10 <sup>-1</sup>          | 2.8×10 <sup>5</sup>                                  | <b>5.7×10<sup>-3</sup></b>   | 5.3                                                     | <b>9.0×10<sup>-4</sup></b>      | 5.0×10 <sup>2</sup>              | <b>1.×10<sup>-4</sup></b>        |
| Y492G   | 4.2×10 <sup>1</sup>               | <b>2.2×10<sup>-3</sup></b> | 3.6×10 <sup>1</sup>   | <b>5.0×10<sup>-4</sup></b> | 1.3×10 <sup>6</sup>                                   | 7.2×10 <sup>-1</sup>          | 2.2×10 <sup>5</sup>                                  | <b>6.1×10<sup>-3</sup></b>   | 1.3×10 <sup>1</sup>                                     | 2.9×10 <sup>-1</sup>            | 2.5×10 <sup>2</sup>              | <b>1.×10<sup>-4</sup></b>        |
| Y492V   | 4.4×10 <sup>1</sup>               | <b>9.0×10<sup>-4</sup></b> | 6.8×10 <sup>1</sup>   | 9.6×10 <sup>-2</sup>       | 7.5×10 <sup>5</sup>                                   | 4.9×10 <sup>-2</sup>          | 2.7×10 <sup>5</sup>                                  | <b>2.2×10<sup>-3</sup></b>   | ≤ 1.9                                                   | <b>0</b>                        | 6.0×10 <sup>2</sup>              | 5.7×10 <sup>-1</sup>             |
| D493G   | 1.8×10 <sup>1</sup>               | <b>0</b>                   | 3.8×10 <sup>1</sup>   | <b>0</b>                   | 7.5×10 <sup>5</sup>                                   | 4.8×10 <sup>-2</sup>          | 3.7×10 <sup>4</sup>                                  | <b>2.0×10<sup>-4</sup></b>   | 2.1                                                     | 1.0×10 <sup>-2</sup>            | 1.3×10 <sup>2</sup>              | <b>1.×10<sup>-4</sup></b>        |
| D493V   | 5.8×10 <sup>1</sup>               | <b>2.6×10<sup>-3</sup></b> | 5.4×10 <sup>1</sup>   | <b>2.2×10<sup>-3</sup></b> | 1.2×10 <sup>6</sup>                                   | 5.1×10 <sup>-1</sup>          | 8.2×10 <sup>4</sup>                                  | <b>3.0×10<sup>-4</sup></b>   | 3.6                                                     | <b>1.4×10<sup>-3</sup></b>      | 2.1×10 <sup>2</sup>              | <b>0</b>                         |
| S494G   | 5.2×10 <sup>1</sup>               | <b>6.2×10<sup>-3</sup></b> | 6.2×10 <sup>1</sup>   | 5.3×10 <sup>-2</sup>       | 8.3×10 <sup>5</sup>                                   | 1.1×10 <sup>-1</sup>          | 2.0×10 <sup>5</sup>                                  | <b>3.8×10<sup>-3</sup></b>   | 1.1×10 <sup>1</sup>                                     | 1.2×10 <sup>-1</sup>            | 4.2×10 <sup>2</sup>              | <b>1.×10<sup>-4</sup></b>        |
| S494V   | 1.7×10 <sup>1</sup>               | <b>0</b>                   | 5.4×10 <sup>1</sup>   | <b>3.0×10<sup>-4</sup></b> | 2.8×10 <sup>5</sup>                                   | <b>0</b>                      | 7.1×10 <sup>4</sup>                                  | <b>0</b>                     | 1.9                                                     | <b>5.0×10<sup>-4</sup></b>      | 2.4×10 <sup>2</sup>              | <b>0</b>                         |
| H495G   | -                                 | -                          | -                     | -                          | ≤ 1.1×10 <sup>3</sup>                                 | <b>0</b>                      | ≤ 1.2×10 <sup>3</sup>                                | <b>0</b>                     | ≤ 1.3                                                   | <b>0</b>                        | -                                | -                                |
| H495V   | 1.9×10 <sup>1</sup>               | <b>5.1×10<sup>-3</sup></b> | 8.5×10 <sup>1</sup>   | 1.0                        | 2.1×10 <sup>5</sup>                                   | 1.6×10 <sup>-2</sup>          | 1.5×10 <sup>5</sup>                                  | 1.1×10 <sup>-2</sup>         | ≤ 1.9                                                   | <b>3.0×10<sup>-4</sup></b>      | 5.1×10 <sup>2</sup>              | 1.9×10 <sup>-2</sup>             |
| I496G   | 5.8×10 <sup>-1</sup>              | <b>1.×10<sup>-4</sup></b>  | 7.4×10 <sup>1</sup>   | 3.0×10 <sup>-1</sup>       | 7.5×10 <sup>3</sup>                                   | <b>3.0×10<sup>-4</sup></b>    | ≤ 1.3×10 <sup>3</sup>                                | <b>0</b>                     | ≤ 1.1                                                   | <b>0</b>                        | 3.9×10 <sup>2</sup>              | <b>1.1×10<sup>-3</sup></b>       |
| I496V   | 3.6×10 <sup>1</sup>               | <b>4.0×10<sup>-4</sup></b> | 8.9×10 <sup>1</sup>   | 7.7×10 <sup>-1</sup>       | 4.1×10 <sup>5</sup>                                   | <b>4.9×10<sup>-3</sup></b>    | 3.4×10 <sup>5</sup>                                  | 2.0×10 <sup>-2</sup>         | 6.2                                                     | <b>7.3×10<sup>-3</sup></b>      | 5.2×10 <sup>2</sup>              | <b>8.1×10<sup>-3</sup></b>       |
| P497G   | 1.8×10 <sup>1</sup>               | <b>3.6×10<sup>-3</sup></b> | 6.0×10 <sup>1</sup>   | 8.0×10 <sup>-2</sup>       | 2.2×10 <sup>5</sup>                                   | <b>6.5×10<sup>-3</sup></b>    | 9.8×10 <sup>4</sup>                                  | <b>1.0×10<sup>-3</sup></b>   | ≤ 1.1                                                   | <b>2.0×10<sup>-4</sup></b>      | 5.7×10 <sup>2</sup>              | 2.8×10 <sup>-1</sup>             |
| L498G   | 4.7×10 <sup>1</sup>               | 1.3×10 <sup>-2</sup>       | 4.1×10 <sup>1</sup>   | <b>3.7×10<sup>-3</sup></b> | 8.5×10 <sup>5</sup>                                   | 1.9×10 <sup>-1</sup>          | ≤ 1.4×10 <sup>5</sup>                                | <b>2.3×10<sup>-3</sup></b>   | 2.0×10 <sup>1</sup>                                     | 3.3×10 <sup>-1</sup>            | 4.6×10 <sup>2</sup>              | <b>4.0×10<sup>-4</sup></b>       |
| L498V   | 5.6×10 <sup>1</sup>               | 1.2×10 <sup>-2</sup>       | 1.0×10 <sup>2</sup>   | 2.0×10 <sup>-1</sup>       | 5.6×10 <sup>5</sup>                                   | 2.3×10 <sup>-2</sup>          | 2.8×10 <sup>5</sup>                                  | <b>4.8×10<sup>-3</sup></b>   | 5.0                                                     | <b>7.0×10<sup>-4</sup></b>      | 6.7×10 <sup>2</sup>              | 1.1×10 <sup>-1</sup>             |
| L499G   | 9.1×10 <sup>1</sup>               | 2.6×10 <sup>-1</sup>       | 7.5×10 <sup>1</sup>   | 5.1×10 <sup>-1</sup>       | 1.1×10 <sup>6</sup>                                   | 5.1×10 <sup>-1</sup>          | 1.3×10 <sup>5</sup>                                  | <b>9.0×10<sup>-4</sup></b>   | 7.7                                                     | 2.4×10 <sup>-2</sup>            | 6.0×10 <sup>2</sup>              | 6.3×10 <sup>-1</sup>             |
| L499V   | 9.2×10 <sup>1</sup>               | 1.1×10 <sup>-1</sup>       | 9.8×10 <sup>1</sup>   | 1.8×10 <sup>-1</sup>       | 9.8×10 <sup>5</sup>                                   | 1.6×10 <sup>-1</sup>          | 4.9×10 <sup>5</sup>                                  | 2.8×10 <sup>-1</sup>         | 9.5                                                     | 5.1×10 <sup>-2</sup>            | 6.8×10 <sup>2</sup>              | 6.9×10 <sup>-2</sup>             |
| F500G   | 1.6×10 <sup>-2</sup>              | <b>1.4×10<sup>-3</sup></b> | 2.7×10 <sup>1</sup>   | <b>2.0×10<sup>-4</sup></b> | 7.3×10 <sup>2</sup>                                   | <b>3.0×10<sup>-3</sup></b>    | ≤ 1.1×10 <sup>3</sup>                                | <b>0</b>                     | ≤ 1.6                                                   | <b>0</b>                        | -                                | -                                |
| F500V   | 3.2×10 <sup>1</sup>               | <b>2.1×10<sup>-3</sup></b> | 7.3×10 <sup>1</sup>   | 3.4×10 <sup>-1</sup>       | 4.6×10 <sup>5</sup>                                   | 2.1×10 <sup>-2</sup>          | 1.1×10 <sup>5</sup>                                  | <b>1.0×10<sup>-3</sup></b>   | ≤ 1.8                                                   | <b>1.3×10<sup>-3</sup></b>      | 4.2×10 <sup>2</sup>              | <b>0</b>                         |
| M501G   | 5.6×10 <sup>1</sup>               | 2.9×10 <sup>-2</sup>       | 7.3×10 <sup>1</sup>   | 3.4×10 <sup>-1</sup>       | 7.6×10 <sup>5</sup>                                   | 1.3×10 <sup>-1</sup>          | 3.3×10 <sup>4</sup>                                  | <b>0</b>                     | 2.9                                                     | <b>1.2×10<sup>-3</sup></b>      | 5.9×10 <sup>2</sup>              | 3.5×10 <sup>-1</sup>             |
| M501V   | 9.4×10 <sup>1</sup>               | 2.6×10 <sup>-1</sup>       | 7.4×10 <sup>1</sup>   | 2.6×10 <sup>-1</sup>       | 1.1×10 <sup>6</sup>                                   | 3.2×10 <sup>-1</sup>          | 1.9×10 <sup>5</sup>                                  | 7.5×10 <sup>-2</sup>         | ≤ 5.0                                                   | 2.6×10 <sup>-2</sup>            | 5.9×10 <sup>2</sup>              | 3.8×10 <sup>-1</sup>             |
| G502A   | 1.8×10 <sup>1</sup>               | <b>4.7×10<sup>-3</sup></b> | 9.1×10 <sup>1</sup>   | 7.0×10 <sup>-1</sup>       | 2.2×10 <sup>5</sup>                                   | 1.6×10 <sup>-2</sup>          | 7.7×10 <sup>4</sup>                                  | <b>1.4×10<sup>-3</sup></b>   | ≤ 9.9×10 <sup>-1</sup>                                  | <b>2.0×10<sup>-4</sup></b>      | 5.5×10 <sup>2</sup>              | 2.1×10 <sup>-1</sup>             |
| G502V   | 8.3×10 <sup>-2</sup>              | <b>5.0×10<sup>-4</sup></b> | 5.2×10 <sup>1</sup>   | 1.9×10 <sup>-2</sup>       | 1.5×10 <sup>3</sup>                                   | <b>1.9×10<sup>-3</sup></b>    | ≤ 1.1×10 <sup>4</sup>                                | <b>0</b>                     | ≤ 1.1                                                   | <b>0</b>                        | -                                | -                                |
| W503G   | 3.0×10 <sup>1</sup>               | <b>4.0×10<sup>-4</sup></b> | 6.9×10 <sup>1</sup>   | 1.5×10 <sup>-1</sup>       | 5.6×10 <sup>5</sup>                                   | 1.7×10 <sup>-2</sup>          | 1.4×10 <sup>5</sup>                                  | <b>1.3×10<sup>-3</sup></b>   | 5.6                                                     | <b>9.0×10<sup>-4</sup></b>      | 6.0×10 <sup>2</sup>              | 5.6×10 <sup>-1</sup>             |
| W503V   | 4.5×10 <sup>1</sup>               | <b>1.0×10<sup>-3</sup></b> | 8.4×10 <sup>1</sup>   | 8.5×10 <sup>-1</sup>       | 4.2×10 <sup>5</sup>                                   | <b>3.0×10<sup>-3</sup></b>    | 9.9×10 <sup>4</sup>                                  | 2.3×10 <sup>-2</sup>         | 6.4                                                     | 1.2×10 <sup>-2</sup>            | 6.0×10 <sup>2</sup>              | 5.4×10 <sup>-1</sup>             |
| G504A   | 9.1×10 <sup>1</sup>               | 1.1×10 <sup>-1</sup>       | 6.9×10 <sup>1</sup>   | 1.1×10 <sup>-1</sup>       | 1.2×10 <sup>6</sup>                                   | 5.7×10 <sup>-1</sup>          | 2.7×10 <sup>5</sup>                                  | 5.7×10 <sup>-2</sup>         | 9.6                                                     | 2.0×10 <sup>-2</sup>            | 6.1×10 <sup>2</sup>              | 6.7×10 <sup>-1</sup>             |
| G504V   | 3.5×10 <sup>1</sup>               | <b>2.0×10<sup>-4</sup></b> | 8.4×10 <sup>1</sup>   | 9.1×10 <sup>-1</sup>       | 3.7×10 <sup>5</sup>                                   | <b>6.0×10<sup>-4</sup></b>    | 2.1×10 <sup>5</sup>                                  | <b>4.0×10<sup>-3</sup></b>   | ≤ 1.9                                                   | <b>1.×10<sup>-4</sup></b>       | 6.4×10 <sup>2</sup>              | 3.7×10 <sup>-1</sup>             |
| I505G   | 1.2×10 <sup>1</sup>               | <b>0</b>                   | 6.3×10 <sup>1</sup>   | 2.3×10 <sup>-2</sup>       | 1.8×10 <sup>5</sup>                                   | <b>3.0×10<sup>-4</sup></b>    | 2.5×10 <sup>4</sup>                                  | <b>0</b>                     | ≤ 1.2                                                   | <b>0</b>                        | 6.4×10 <sup>2</sup>              | 3.6×10 <sup>-1</sup>             |
| I505V   | 1.6×10 <sup>2</sup>               | 5.2×10 <sup>-2</sup>       | 9.4×10 <sup>1</sup>   | 4.1×10 <sup>-1</sup>       | 1.9×10 <sup>6</sup>                                   | 1.8×10 <sup>-1</sup>          | 6.1×10 <sup>5</sup>                                  | 1.0                          | 1.3×10 <sup>1</sup>                                     | 5.9×10 <sup>-1</sup>            | 6.8×10 <sup>2</sup>              | 6.2×10 <sup>-2</sup>             |
| K506G   | 1.7×10 <sup>2</sup>               | 3.6×10 <sup>-2</sup>       | 7.3×10 <sup>1</sup>   | 2.8×10 <sup>-1</sup>       | 2.3×10 <sup>6</sup>                                   | 2.8×10 <sup>-2</sup>          | 4.3×10 <sup>5</sup>                                  | 1.2×10 <sup>-1</sup>         | 1.8×10 <sup>1</sup>                                     | 5.2×10 <sup>-1</sup>            | 5.9×10 <sup>2</sup>              | 3.9×10 <sup>-1</sup>             |
| K506V   | 1.2×10 <sup>2</sup>               | 7.9×10 <sup>-1</sup>       | 9.3×10 <sup>1</sup>   | 3.3×10 <sup>-1</sup>       | 1.2×10 <sup>6</sup>                                   | 4.6×10 <sup>-1</sup>          | 3.6×10 <sup>5</sup>                                  | 5.0×10 <sup>-2</sup>         | 9.9                                                     | 1.1×10 <sup>-1</sup>            | 6.9×10 <sup>2</sup>              | 1.7×10 <sup>-2</sup>             |
| Q507G   | 1.1×10 <sup>2</sup>               | 5.5×10 <sup>-1</sup>       | 6.8×10 <sup>1</sup>   | 2.2×10 <sup>-1</sup>       | 1.6×10 <sup>6</sup>                                   | 6.7×10 <sup>-1</sup>          | 5.1×10 <sup>5</sup>                                  | 4.0×10<                      |                                                         |                                 |                                  |                                  |

| Variant | $k_{cat}$ cMUP ( $s^{-1}$ ) | $k_{cat}$ cMUP $p$ -value              | $K_M$ cMUP ( $\mu M$ ) | $K_M$ cMUP $p$ -value                  | $k_{cat}/K_M$ cMUP ( $M^{-1}s^{-1}$ ) | $k_{cat}/K_M$ cMUP $p$ -value          | $k_{cat}/K_M$ MeP ( $M^{-1}s^{-1}$ ) | $k_{cat}/K_M$ MeP $p$ -value           | $k_{cat}/K_M$ MecMUP ( $M^{-1}s^{-1}$ ) | $k_{cat}/K_M$ MecMUP $p$ -value        | $K_i$ PO <sub>4</sub> ( $\mu M$ ) | $K_i$ PO <sub>4</sub> $p$ -value       |
|---------|-----------------------------|----------------------------------------|------------------------|----------------------------------------|---------------------------------------|----------------------------------------|--------------------------------------|----------------------------------------|-----------------------------------------|----------------------------------------|-----------------------------------|----------------------------------------|
| M516V   | $5.2 \times 10^1$           | <b><math>7.5 \times 10^{-3}</math></b> | $9.4 \times 10^1$      | $4.5 \times 10^{-1}$                   | $6.4 \times 10^5$                     | $3.6 \times 10^{-2}$                   | $3.1 \times 10^5$                    | $1.0 \times 10^{-2}$                   | 6.5                                     | $1.3 \times 10^{-2}$                   | $5.2 \times 10^2$                 | <b><math>4.4 \times 10^{-3}</math></b> |
| T517G   | $2.8 \times 10^1$           | <b><math>5.0 \times 10^{-4}</math></b> | $6.0 \times 10^1$      | $3.5 \times 10^{-2}$                   | $4.7 \times 10^5$                     | <b><math>9.9 \times 10^{-3}</math></b> | $1.5 \times 10^5$                    | <b><math>2.7 \times 10^{-3}</math></b> | $\leq 1.1$                              | <b>0</b>                               | $5.2 \times 10^2$                 | <b><math>5.3 \times 10^{-3}</math></b> |
| T517V   | $1.2 \times 10^1$           | <b>0</b>                               | $7.4 \times 10^1$      | $1.8 \times 10^{-1}$                   | $1.8 \times 10^5$                     | <b><math>1. \times 10^{-4}</math></b>  | $1.2 \times 10^5$                    | <b>0</b>                               | 2.3                                     | <b><math>1.3 \times 10^{-3}</math></b> | $3.8 \times 10^2$                 | <b>0</b>                               |
| D518G   | $1.9 \times 10^1$           | <b><math>6.0 \times 10^{-4}</math></b> | $6.1 \times 10^1$      | $4.8 \times 10^{-2}$                   | $2.7 \times 10^5$                     | <b><math>3.2 \times 10^{-3}</math></b> | $8.2 \times 10^4$                    | <b><math>1.6 \times 10^{-3}</math></b> | 3.4                                     | <b>0</b>                               | $3.8 \times 10^2$                 | <b>0</b>                               |
| D518V   | $9.2 \times 10^{-1}$        | <b>0</b>                               | $5.4 \times 10^1$      | $1.2 \times 10^{-2}$                   | $1.8 \times 10^4$                     | <b><math>5.0 \times 10^{-4}</math></b> | $\leq 1.6 \times 10^4$               | <b><math>2.0 \times 10^{-4}</math></b> | $\leq 1.3$                              | <b>0</b>                               | $4.3 \times 10^2$                 | <b><math>6.0 \times 10^{-4}</math></b> |
| I519G   | 9.9                         | <b><math>5.0 \times 10^{-4}</math></b> | $6.2 \times 10^1$      | $5.3 \times 10^{-2}$                   | $1.6 \times 10^5$                     | <b><math>1.3 \times 10^{-3}</math></b> | $1.3 \times 10^4$                    | <b><math>1. \times 10^{-4}</math></b>  | $\leq 1.1$                              | <b><math>1. \times 10^{-4}</math></b>  | $3.5 \times 10^2$                 | <b><math>7.0 \times 10^{-4}</math></b> |
| I519V   | $7.8 \times 10^1$           | $7.2 \times 10^{-2}$                   | $8.8 \times 10^1$      | $7.7 \times 10^{-1}$                   | $9.0 \times 10^5$                     | $1.6 \times 10^{-1}$                   | $3.4 \times 10^5$                    | $4.2 \times 10^{-2}$                   | 8.6                                     | $2.2 \times 10^{-2}$                   | $5.9 \times 10^2$                 | $2.3 \times 10^{-1}$                   |
| A520G   | $1.2 \times 10^2$           | $8.8 \times 10^{-1}$                   | $6.3 \times 10^1$      | $6.2 \times 10^{-2}$                   | $1.8 \times 10^6$                     | $2.9 \times 10^{-1}$                   | $3.6 \times 10^5$                    | $4.6 \times 10^{-2}$                   | $1.2 \times 10^1$                       | $3.0 \times 10^{-1}$                   | $4.4 \times 10^2$                 | <b><math>1. \times 10^{-4}</math></b>  |
| A520V   | $5.6 \times 10^1$           | $1.1 \times 10^{-2}$                   | $8.1 \times 10^1$      | $6.8 \times 10^{-1}$                   | $6.8 \times 10^5$                     | $4.8 \times 10^{-2}$                   | $3.7 \times 10^5$                    | $5.3 \times 10^{-2}$                   | $\leq 2.0$                              | <b><math>1.8 \times 10^{-3}</math></b> | $6.3 \times 10^2$                 | $5.6 \times 10^{-1}$                   |
| P521G   | $4.2 \times 10^1$           | <b><math>4.5 \times 10^{-3}</math></b> | $5.7 \times 10^1$      | $4.3 \times 10^{-2}$                   | $8.1 \times 10^5$                     | $1.7 \times 10^{-1}$                   | $2.0 \times 10^5$                    | <b><math>4.4 \times 10^{-3}</math></b> | 9.9                                     | $4.2 \times 10^{-2}$                   | $4.6 \times 10^2$                 | <b><math>7.0 \times 10^{-4}</math></b> |
| P521V   | $1.6 \times 10^2$           | $3.2 \times 10^{-2}$                   | $8.8 \times 10^1$      | $8.2 \times 10^{-1}$                   | $2.1 \times 10^6$                     | $6.3 \times 10^{-2}$                   | $5.0 \times 10^5$                    | $3.7 \times 10^{-1}$                   | $1.4 \times 10^1$                       | $5.7 \times 10^{-1}$                   | $6.0 \times 10^2$                 | $7.0 \times 10^{-1}$                   |
| T522G   | 2.0                         | <b>0</b>                               | $7.3 \times 10^1$      | $2.4 \times 10^{-1}$                   | $2.8 \times 10^4$                     | <b>0</b>                               | $4.9 \times 10^3$                    | <b><math>7.0 \times 10^{-4}</math></b> | $\leq 1.2$                              | <b>0</b>                               | $5.8 \times 10^2$                 | $2.4 \times 10^{-1}$                   |
| T522V   | $1.0 \times 10^1$           | <b><math>1.0 \times 10^{-3}</math></b> | $5.8 \times 10^1$      | $4.9 \times 10^{-2}$                   | $2.3 \times 10^5$                     | <b><math>4.4 \times 10^{-3}</math></b> | $2.7 \times 10^4$                    | <b><math>5.0 \times 10^{-4}</math></b> | 1.9                                     | <b><math>8.0 \times 10^{-3}</math></b> | $3.5 \times 10^2$                 | <b><math>1.3 \times 10^{-3}</math></b> |
| V523A   | $1.0 \times 10^2$           | $3.1 \times 10^{-1}$                   | $7.9 \times 10^1$      | $4.8 \times 10^{-1}$                   | $1.1 \times 10^6$                     | $3.9 \times 10^{-1}$                   | $8.4 \times 10^4$                    | <b><math>3.9 \times 10^{-3}</math></b> | 8.9                                     | $6.8 \times 10^{-2}$                   | $5.4 \times 10^2$                 | $3.3 \times 10^{-2}$                   |
| V523G   | $6.0 \times 10^{-2}$        | <b>0</b>                               | $3.7 \times 10^1$      | <b><math>4.0 \times 10^{-4}</math></b> | $1.5 \times 10^3$                     | <b><math>4.0 \times 10^{-4}</math></b> | $\leq 1.3 \times 10^3$               | <b><math>2.0 \times 10^{-4}</math></b> | $\leq 9.9 \times 10^{-1}$               | <b>0</b>                               | -                                 | -                                      |
| S524G   | $7.9 \times 10^1$           | $4.0 \times 10^{-2}$                   | $5.9 \times 10^1$      | $1.4 \times 10^{-2}$                   | $1.4 \times 10^6$                     | $8.9 \times 10^{-1}$                   | $4.1 \times 10^5$                    | $8.1 \times 10^{-2}$                   | $1.6 \times 10^1$                       | $9.4 \times 10^{-1}$                   | $5.2 \times 10^2$                 | <b><math>5.5 \times 10^{-3}</math></b> |
| S524V   | $8.5 \times 10^1$           | $5.6 \times 10^{-2}$                   | $8.8 \times 10^1$      | $7.7 \times 10^{-1}$                   | $1.0 \times 10^6$                     | $1.9 \times 10^{-1}$                   | $4.5 \times 10^5$                    | $1.8 \times 10^{-1}$                   | $1.3 \times 10^1$                       | $3.3 \times 10^{-1}$                   | $6.0 \times 10^2$                 | $5.4 \times 10^{-1}$                   |
| S525G   | $7.5 \times 10^1$           | $2.9 \times 10^{-2}$                   | $6.5 \times 10^1$      | $6.1 \times 10^{-2}$                   | $8.5 \times 10^5$                     | $8.7 \times 10^{-2}$                   | $\leq 2.3 \times 10^5$               | $1.5 \times 10^{-2}$                   | $1.2 \times 10^1$                       | $1.9 \times 10^{-1}$                   | $5.8 \times 10^2$                 | $2.7 \times 10^{-1}$                   |
| S525V   | $9.1 \times 10^1$           | $1.2 \times 10^{-1}$                   | $9.1 \times 10^1$      | $5.5 \times 10^{-1}$                   | $9.5 \times 10^5$                     | $1.4 \times 10^{-1}$                   | $6.2 \times 10^5$                    | $9.2 \times 10^{-1}$                   | 9.8                                     | $1.4 \times 10^{-1}$                   | $6.3 \times 10^2$                 | $5.0 \times 10^{-1}$                   |
| L526G   | $1.2 \times 10^1$           | <b>0</b>                               | $5.9 \times 10^1$      | <b><math>6.6 \times 10^{-3}</math></b> | $2.2 \times 10^5$                     | <b><math>1. \times 10^{-4}</math></b>  | $5.4 \times 10^4$                    | <b>0</b>                               | 2.2                                     | <b><math>4.0 \times 10^{-4}</math></b> | $5.2 \times 10^2$                 | <b><math>5.0 \times 10^{-4}</math></b> |
| L526V   | $1.7 \times 10^2$           | $6.1 \times 10^{-2}$                   | $1.0 \times 10^2$      | $1.0 \times 10^{-1}$                   | $1.6 \times 10^6$                     | $6.0 \times 10^{-1}$                   | $7.1 \times 10^5$                    | $4.9 \times 10^{-1}$                   | $1.6 \times 10^1$                       | $9.4 \times 10^{-1}$                   | $6.2 \times 10^2$                 | $7.8 \times 10^{-1}$                   |
| L527G   | 8.9                         | <b>0</b>                               | $6.5 \times 10^1$      | $3.0 \times 10^{-2}$                   | $1.4 \times 10^5$                     | <b>0</b>                               | $1.2 \times 10^4$                    | <b>0</b>                               | $\leq 1.3$                              | <b><math>2.0 \times 10^{-4}</math></b> | $5.3 \times 10^2$                 | <b><math>3.6 \times 10^{-3}</math></b> |
| L527V   | $1.2 \times 10^2$           | $7.2 \times 10^{-1}$                   | $8.1 \times 10^1$      | $5.8 \times 10^{-1}$                   | $1.5 \times 10^6$                     | $6.2 \times 10^{-1}$                   | $3.1 \times 10^5$                    | <b><math>5.4 \times 10^{-3}</math></b> | 7.6                                     | $2.7 \times 10^{-2}$                   | $6.0 \times 10^2$                 | $4.8 \times 10^{-1}$                   |
| K528G   | 7.1                         | <b>0</b>                               | $5.2 \times 10^1$      | <b><math>2.0 \times 10^{-4}</math></b> | $1.5 \times 10^5$                     | <b>0</b>                               | $1.9 \times 10^4$                    | <b>0</b>                               | 1.6                                     | <b><math>2.0 \times 10^{-4}</math></b> | $4.3 \times 10^2$                 | <b>0</b>                               |
| K528V   | $1.8 \times 10^1$           | <b>0</b>                               | $8.1 \times 10^1$      | $6.1 \times 10^{-1}$                   | $2.5 \times 10^5$                     | <b><math>1. \times 10^{-4}</math></b>  | $1.6 \times 10^5$                    | <b><math>2.0 \times 10^{-3}</math></b> | $\leq 1.3$                              | <b><math>8.0 \times 10^{-4}</math></b> | $4.2 \times 10^2$                 | <b><math>6.0 \times 10^{-4}</math></b> |
| I529G   | $1.1 \times 10^1$           | <b>0</b>                               | $5.2 \times 10^1$      | <b><math>6.0 \times 10^{-4}</math></b> | $2.2 \times 10^5$                     | <b>0</b>                               | $6.3 \times 10^4$                    | <b>0</b>                               | 1.5                                     | <b><math>1.4 \times 10^{-3}</math></b> | $3.8 \times 10^2$                 | <b>0</b>                               |
| I529V   | $8.2 \times 10^1$           | $1.0 \times 10^{-1}$                   | $8.4 \times 10^1$      | $9.2 \times 10^{-1}$                   | $1.3 \times 10^6$                     | $7.8 \times 10^{-1}$                   | $5.8 \times 10^5$                    | $8.3 \times 10^{-1}$                   | $1.2 \times 10^1$                       | $4.0 \times 10^{-1}$                   | $6.1 \times 10^2$                 | $6.9 \times 10^{-1}$                   |
| Q530G   | $9.7 \times 10^1$           | $2.1 \times 10^{-1}$                   | $4.8 \times 10^1$      | <b><math>8.0 \times 10^{-4}</math></b> | $1.7 \times 10^6$                     | $3.9 \times 10^{-1}$                   | $6.2 \times 10^4$                    | $3.9 \times 10^{-2}$                   | 9.9                                     | $1.7 \times 10^{-2}$                   | $4.7 \times 10^2$                 | <b><math>1. \times 10^{-4}</math></b>  |
| Q530V   | $5.2 \times 10^1$           | <b><math>6.0 \times 10^{-4}</math></b> | $6.6 \times 10^1$      | $3.4 \times 10^{-2}$                   | $8.0 \times 10^5$                     | $3.0 \times 10^{-2}$                   | $3.9 \times 10^5$                    | $1.3 \times 10^{-2}$                   | 4.0                                     | <b><math>1. \times 10^{-4}</math></b>  | $4.3 \times 10^2$                 | <b>0</b>                               |
| F531G   | $1.2 \times 10^2$           | $9.1 \times 10^{-1}$                   | $6.6 \times 10^1$      | $1.2 \times 10^{-1}$                   | $2.1 \times 10^6$                     | $6.8 \times 10^{-2}$                   | $3.9 \times 10^5$                    | $1.2 \times 10^{-1}$                   | $1.5 \times 10^1$                       | $7.5 \times 10^{-1}$                   | $5.0 \times 10^2$                 | <b><math>2.0 \times 10^{-3}</math></b> |
| F531V   | $7.6 \times 10^1$           | $3.1 \times 10^{-2}$                   | $8.2 \times 10^1$      | $7.0 \times 10^{-1}$                   | $9.7 \times 10^5$                     | $1.6 \times 10^{-1}$                   | $3.6 \times 10^5$                    | $4.4 \times 10^{-2}$                   | 7.4                                     | $1.9 \times 10^{-2}$                   | $5.8 \times 10^2$                 | $2.3 \times 10^{-1}$                   |
| P532G   | $8.7 \times 10^1$           | $1.2 \times 10^{-1}$                   | $5.3 \times 10^1$      | $1.5 \times 10^{-2}$                   | $1.8 \times 10^6$                     | $3.8 \times 10^{-1}$                   | $2.0 \times 10^5$                    | <b><math>5.0 \times 10^{-3}</math></b> | $1.7 \times 10^1$                       | $9.4 \times 10^{-1}$                   | $4.0 \times 10^2$                 | <b><math>1. \times 10^{-4}</math></b>  |
| P532V   | $2.7 \times 10^1$           | <b><math>5.0 \times 10^{-4}</math></b> | $6.7 \times 10^1$      | $1.3 \times 10^{-1}$                   | $3.7 \times 10^5$                     | <b><math>4.5 \times 10^{-3}</math></b> | $8.9 \times 10^4$                    | $1.7 \times 10^{-2}$                   | $\leq 1.6$                              | <b><math>1. \times 10^{-4}</math></b>  | $3.5 \times 10^2$                 | <b>0</b>                               |
| S533G   | $8.4 \times 10^1$           | $1.1 \times 10^{-1}$                   | $4.2 \times 10^1$      | <b><math>1.5 \times 10^{-3}</math></b> | $1.5 \times 10^6$                     | $8.2 \times 10^{-1}$                   | $2.6 \times 10^5$                    | $1.3 \times 10^{-2}$                   | $1.6 \times 10^1$                       | $8.7 \times 10^{-1}$                   | $3.6 \times 10^2$                 | <b><math>3.0 \times 10^{-4}</math></b> |
| S533V   | 2.2                         | <b>0</b>                               | $3.6 \times 10^1$      | <b>0</b>                               | $5.9 \times 10^4$                     | <b>0</b>                               | $\leq 3.4 \times 10^3$               | <b>0</b>                               | $\leq 1.6$                              | <b><math>1. \times 10^{-4}</math></b>  | -                                 | -                                      |
| G534A   | $1.3 \times 10^2$           | $5.9 \times 10^{-1}$                   | $6.8 \times 10^1$      | $8.9 \times 10^{-2}$                   | $2.2 \times 10^6$                     | $2.9 \times 10^{-2}$                   | $3.9 \times 10^5$                    | $1.1 \times 10^{-1}$                   | $2.9 \times 10^1$                       | <b>0</b>                               | $4.5 \times 10^2$                 | <b>0</b>                               |
| G534V   | $2.5 \times 10^1$           | <b><math>3.0 \times 10^{-4}</math></b> | $5.4 \times 10^1$      | <b><math>4.0 \times 10^{-3}</math></b> | $4.6 \times 10^5$                     | <b><math>3.4 \times 10^{-3}</math></b> | $2.0 \times 10^5$                    | <b><math>3.2 \times 10^{-3}</math></b> | 7.4                                     | $2.1 \times 10^{-2}$                   | $2.4 \times 10^2$                 | <b><math>1. \times 10^{-4}</math></b>  |
| A535G   | $1.2 \times 10^2$           | $7.9 \times 10^{-1}$                   | $6.3 \times 10^1$      | $6.4 \times 10^{-2}$                   | $2.1 \times 10^6$                     | $5.4 \times 10^{-2}$                   | $4.0 \times 10^5$                    | $7.3 \times 10^{-2}$                   | $2.6 \times 10^1$                       | <b><math>4.0 \times 10^{-4}</math></b> | $6.0 \times 10^2$                 | $6.6 \times 10^{-1}$                   |
| A535V   | $1.4 \times 10^2$           | $5.1 \times 10^{-1}$                   | $9.5 \times 10^1$      | $3.4 \times 10^{-1}$                   | $1.1 \times 10^6$                     | $4.2 \times 10^{-1}$                   | $6.8 \times 10^5$                    | $4.3 \times 10^{-1}$                   | $1.3 \times 10^1$                       | $4.3 \times 10^{-1}$                   | $6.4 \times 10^2$                 | $3.6 \times 10^{-1}$                   |
| V536A   | $1.0 \times 10^2$           | $2.7 \times 10^{-1}$                   | $7.7 \times 10^1$      | $3.1 \times 10^{-1}$                   | $1.2 \times 10^6$                     | $6.8 \times 10^{-1}$                   | $1.1 \times 10^5$                    | <b><math>6.3 \times 10^{-3}</math></b> | 7.3                                     | <b><math>4.9 \times 10^{-3}</math></b> | $5.3 \times 10^2$                 | $3.5 \times 10^{-2}$                   |
| V536G   | $1.5 \times 10^1$           | <b><math>1. \times 10^{-4}</math></b>  | $6.3 \times 10^1$      | $4.9 \times 10^{-2}$                   | $3.2 \times 10^5$                     | <b><math>4.3 \times 10^{-3}</math></b> | $\leq 6.2 \times 10^4$               | <b><math>8.0 \times 10^{-4}</math></b> | 2.1                                     | <b>0</b>                               | $4.0 \times 10^2$                 | <b><math>1. \times 10^{-4}</math></b>  |
| G537A   | 9.4                         | <b>0</b>                               | $6.1 \times 10^1$      | $2.0 \times 10^{-2}$                   | $1.2 \times 10^5$                     | <b>0</b>                               | $5.2 \times 10^4$                    | <b><math>4.8 \times 10^{-3}</math></b> | $\leq 9.9 \times 10^{-1}$               | <b>0</b>                               | $4.1 \times 10^2$                 | <b>0</b>                               |
| G537V   | 3.1                         | <b>0</b>                               | $4.2 \times 10^1$      | <b>0</b>                               | $8.7 \times 10^4$                     | <b><math>1. \times 10^{-4}</math></b>  | $\leq 7.6 \times 10^3$               | <b>0</b>                               | $\leq 1.6$                              | <b>0</b>                               | $2.6 \times 10^2$                 | <b>0</b>                               |
| K538G   | $1.2 \times 10^2$           | $7.4 \times 10^{-1}$                   | $6.4 \times 10^1$      | $9.7 \times 10^{-2}$                   | $2.3 \times 10^6$                     | $4.0 \times 10^{-2}$                   | $2.4 \times 10^5$                    | <b><math>8.0 \times 10^{-3}</math></b> | $2.2 \times 10^1$                       | $1.1 \times 10^{-1}$                   | $4.7 \times 10^2$                 | <b><math>5.4 \times 10^{-3}</math></b> |
| K538V   | $1.4 \times 10^2$           | $5.6 \times 10^{-1}$                   | $8.2 \times 10^1$      | $7.3 \times 10^{-1}$                   | $1.9 \times 10^6$                     | $2.5 \times 10^{-1}$                   | $4.3 \times 10^5$                    | $1.2 \times 10^{-1}$                   | $1.1 \times 10^1$                       | $2.1 \times 10^{-1}$                   | $5.9 \times 10^2$                 | $3.4 \times 10^{-1}$                   |
| P539G   | $1.4 \times 10^2$           | $4.5 \times 10^{-1}$                   | $8.1 \times 10^1$      | $6.6 \times 10^{-1}$                   | $1.6 \times 10^6$                     | $5.7 \times 10^{-1}$                   | $5.5 \times 10^5$                    | $6.2 \times 10^{-1}$                   | $1.2 \times 10^1$                       | $1.4 \times 10^{-1}$                   | $6.3 \times 10^2$                 | $4.3 \times 10^{-1}$                   |
| P539V   | $1.5 \times 10^2$           | $9.1 \times 10^{-2}$                   | $9.4 \times 10^1$      | $4.1 \times 10^{-1}$                   | $1.8 \times 10^6$                     | $2.4 \times 10^{-1}$                   | $9.1 \times 10^5$                    | <b><math>7.5 \times 10^{-3}</math></b> | $1.4 \times 10^1$                       | $5.0 \times 10^{-1}$                   | $6.5 \times 10^2$                 | $2.7 \times 10^{-1}$                   |
| I540G   | 3.8                         | <b>0</b>                               | $5.2 \times 10^1$      | <b><math>2.6 \times 10^{-3}</math></b> | $6.1 \times 10^4$                     | <b>0</b>                               | $7.1 \times 10^3$                    | <b><math>7.7 \times 10^{-3}</math></b> | $\leq 9.9 \times 10^{-1}$               | <b>0</b>                               | $3.5 \times 10^2$                 | <b><math>1.0 \times 10^{-3}</math></b> |
| I540V   | $7.4 \times 10^1$           | $2.9 \times 10^{-2}$                   | $8.7 \times 10^1$      | $8.9 \times 10^{-1}$                   | $7.9 \times 10^5$                     | $4.5 \times 10^{-2}$                   | $4.0 \times 10^5$                    | $1.0 \times 10^{-1}$                   | 6.9                                     | $1.5 \times 10^{-2}$                   | $6.0 \times 10^2$                 | $5.2 \times 10^{-1}$                   |
| T541G   | $3.9 \times 10^1$           | <b>0</b>                               | $6.1 \times 10^1$      | $2.2 \times 10^{-2}$                   | $6.6 \times 10^5$                     | $2.7 \times 10^{-2}$                   | $2.4 \times 10^5$                    | $2.2 \times 10^{-2}$                   | 8.9                                     | $3.2 \times 10^{-2}$                   | $5.2 \times 10^2$                 | <b><math>1.9 \times 10^{-3}</math></b> |
| T541V   | $1.2 \times 10^2$           | $9.3 \times 10^{-1}$                   | $8.9 \times 10^1$      | $7.3 \times 10^{-1}$                   | $1.4 \times 10^6$                     | $6.7 \times 10^{-1}$                   | $5.5 \times 10^5$                    | $5.5 \times 10^{-1}$                   | $1.1 \times 10^1$                       | $2.9 \times 10^{-1}$                   | $6.6 \times 10^2$                 | $1.2 \times 10^{-1}$                   |
| E542G   | $3.2 \times 10^1$           | <b><math>9.0 \times 10^{-4}</math></b> | $7.0 \times 10^1$      | $2.1 \times 10^{-1}$                   | $5.0 \times 10^5$                     | $1.5 \times 10^{-2}$                   | $2.1 \times 10^5$                    | $1.8 \times 10^{-2}$ </                |                                         |                                        |                                   |                                        |

Additional parameters and FCs

| Variant | $f_a$                     | $f_a$ $p$ -value                       | $(k_{cat}/K_M)_{chem}^{MeP}$ ( $M^{-1}s^{-1}$ ) | $(k_{cat}/K_M)_{chem}^{MeP}$ $p$ -value | FC1                    | FC1 $p$ -value                         | FC2                       | FC3 | FC2/3 $p$ -value                       | FC4 ( $s^{-1}$ )       | FC4 $p$ -value                         |
|---------|---------------------------|----------------------------------------|-------------------------------------------------|-----------------------------------------|------------------------|----------------------------------------|---------------------------|-----|----------------------------------------|------------------------|----------------------------------------|
| Q21G    | 1.4                       | $1.2 \times 10^{-1}$                   | $4.4 \times 10^5$                               | $2.7 \times 10^{-1}$                    | $9.5 \times 10^{-1}$   | $7.4 \times 10^{-1}$                   | N/A                       | 1.0 | $3.8 \times 10^{-1}$                   | $1.9 \times 10^2$      | $3.4 \times 10^{-1}$                   |
| Q21V    | 1.5                       | $3.8 \times 10^{-2}$                   | $2.8 \times 10^5$                               | $5.6 \times 10^{-2}$                    | 1.7                    | $1.1 \times 10^{-1}$                   | N/A                       | 1.1 | $2.0 \times 10^{-1}$                   | $1.6 \times 10^2$      | $6.1 \times 10^{-1}$                   |
| K22G    | 1.1                       | $7.3 \times 10^{-1}$                   | $4.6 \times 10^5$                               | $5.1 \times 10^{-1}$                    | $9.7 \times 10^{-1}$   | $9.4 \times 10^{-1}$                   | $8.7 \times 10^{-1}$      | N/A | $1.4 \times 10^{-2}$                   | $7.2 \times 10^1$      | $2.6 \times 10^{-1}$                   |
| K22V    | $8.2 \times 10^{-1}$      | $3.9 \times 10^{-1}$                   | $4.9 \times 10^5$                               | $4.7 \times 10^{-1}$                    | 1.4                    | $2.6 \times 10^{-1}$                   | N/A                       | 1.2 | $1.6 \times 10^{-2}$                   | $1.8 \times 10^2$      | $3.0 \times 10^{-1}$                   |
| T23G    | 1.0                       | $9.3 \times 10^{-1}$                   | $6.8 \times 10^5$                               | $8.2 \times 10^{-1}$                    | 1.1                    | $7.5 \times 10^{-1}$                   | N/A                       | 1.0 | $5.1 \times 10^{-1}$                   | $1.3 \times 10^2$      | $7.3 \times 10^{-1}$                   |
| T23V    | 1.4                       | $2.3 \times 10^{-1}$                   | $2.4 \times 10^5$                               | $8.7 \times 10^{-2}$                    | 2.1                    | $1.2 \times 10^{-2}$                   | N/A                       | 1.0 | $5.6 \times 10^{-1}$                   | $1.6 \times 10^2$      | $7.1 \times 10^{-1}$                   |
| N24G    | 1.3                       | $4.6 \times 10^{-1}$                   | $4.4 \times 10^5$                               | $4.4 \times 10^{-1}$                    | $8.7 \times 10^{-1}$   | $6.8 \times 10^{-1}$                   | $7.9 \times 10^{-1}$      | N/A | <b><math>2.0 \times 10^{-3}</math></b> | $9.2 \times 10^1$      | $3.7 \times 10^{-1}$                   |
| N24V    | $9.9 \times 10^{-1}$      | $9.1 \times 10^{-1}$                   | $4.3 \times 10^5$                               | $3.3 \times 10^{-1}$                    | 1.7                    | $6.8 \times 10^{-2}$                   | N/A                       | 1.1 | $2.3 \times 10^{-1}$                   | $1.6 \times 10^2$      | $6.8 \times 10^{-1}$                   |
| A25G    | 1.9                       | $1.9 \times 10^{-2}$                   | $4.5 \times 10^5$                               | $4.2 \times 10^{-1}$                    | 1.1                    | $7.8 \times 10^{-1}$                   | $9.4 \times 10^{-1}$      | N/A | $1.6 \times 10^{-1}$                   | $1.3 \times 10^2$      | $8.1 \times 10^{-1}$                   |
| A25V    | 1.4                       | $1.1 \times 10^{-1}$                   | $4.8 \times 10^5$                               | $5.0 \times 10^{-1}$                    | 1.0                    | $9.4 \times 10^{-1}$                   | N/A                       | 1.1 | $1.6 \times 10^{-1}$                   | $1.9 \times 10^2$      | $2.8 \times 10^{-1}$                   |
| V26A    | $5.2 \times 10^{-1}$      | $1.2 \times 10^{-2}$                   | $3.6 \times 10^5$                               | $2.3 \times 10^{-1}$                    | 1.3                    | $4.3 \times 10^{-1}$                   | $9.7 \times 10^{-1}$      | N/A | $6.3 \times 10^{-1}$                   | $1.1 \times 10^2$      | $5.2 \times 10^{-1}$                   |
| V26G    | $1.9 \times 10^{-1}$      | <b>0</b>                               | $2.1 \times 10^5$                               | <b><math>4.0 \times 10^{-2}</math></b>  | 3.7                    | <b><math>1.8 \times 10^{-3}</math></b> | $8.8 \times 10^{-1}$      | N/A | $1.7 \times 10^{-2}$                   | $1.3 \times 10^2$      | $8.4 \times 10^{-1}$                   |
| P27G    | $3.0 \times 10^{-1}$      | <b><math>2.0 \times 10^{-3}</math></b> | $9.7 \times 10^5$                               | $1.2 \times 10^{-1}$                    | 1.8                    | $5.4 \times 10^{-2}$                   | $9.0 \times 10^{-1}$      | N/A | $4.3 \times 10^{-2}$                   | $2.6 \times 10^2$      | $9.5 \times 10^{-2}$                   |
| P27V    | 1.1                       | $7.5 \times 10^{-1}$                   | $2.4 \times 10^5$                               | $7.1 \times 10^{-2}$                    | 1.9                    | $5.5 \times 10^{-2}$                   | N/A                       | 1.0 | $6.9 \times 10^{-1}$                   | $1.5 \times 10^2$      | $8.8 \times 10^{-1}$                   |
| R28G    | $7.6 \times 10^{-1}$      | $5.1 \times 10^{-1}$                   | $4.7 \times 10^5$                               | $7.1 \times 10^{-1}$                    | 1.0                    | $9.0 \times 10^{-1}$                   | $7.1 \times 10^{-1}$      | N/A | <b><math>1.3 \times 10^{-3}</math></b> | $6.0 \times 10^1$      | $2.8 \times 10^{-1}$                   |
| R28V    | $6.6 \times 10^{-1}$      | $8.7 \times 10^{-2}$                   | $2.0 \times 10^5$                               | $6.8 \times 10^{-2}$                    | 2.9                    | <b><math>5.7 \times 10^{-3}</math></b> | N/A                       | 1.0 | $9.1 \times 10^{-1}$                   | $1.3 \times 10^2$      | $8.7 \times 10^{-1}$                   |
| P29G    | $1.3 \times 10^{-1}$      | <b>0</b>                               | $1.7 \times 10^5$                               | <b><math>4.9 \times 10^{-2}</math></b>  | -                      | -                                      | $8.0 \times 10^{-1}$      | N/A | <b>0</b>                               | $9.1 \times 10^1$      | $2.7 \times 10^{-1}$                   |
| P29V    | $1.4 \times 10^{-1}$      | <b>0</b>                               | $9.1 \times 10^5$                               | $1.8 \times 10^{-1}$                    | -                      | -                                      | $7.1 \times 10^{-1}$      | N/A | <b><math>1. \times 10^{-4}</math></b>  | $1.2 \times 10^2$      | $7.5 \times 10^{-1}$                   |
| K30G    | $8.5 \times 10^{-1}$      | $5.8 \times 10^{-1}$                   | $3.1 \times 10^5$                               | $1.5 \times 10^{-1}$                    | 1.6                    | $1.3 \times 10^{-1}$                   | $8.7 \times 10^{-1}$      | N/A | $1.4 \times 10^{-2}$                   | $6.4 \times 10^1$      | $1.1 \times 10^{-1}$                   |
| K30V    | $6.7 \times 10^{-1}$      | $1.3 \times 10^{-1}$                   | $1.9 \times 10^5$                               | $5.9 \times 10^{-2}$                    | 2.2                    | $2.3 \times 10^{-2}$                   | $8.7 \times 10^{-1}$      | N/A | $4.5 \times 10^{-2}$                   | $1.6 \times 10^2$      | $7.7 \times 10^{-1}$                   |
| L31G    | $\leq 3.6 \times 10^{-3}$ | <b>0</b>                               | $\leq 3.8 \times 10^5$                          | $2.1 \times 10^{-1}$                    | -                      | -                                      | -                         | -   | -                                      | -                      | -                                      |
| L31V    | $9.8 \times 10^{-1}$      | $8.9 \times 10^{-1}$                   | $3.0 \times 10^5$                               | $6.7 \times 10^{-2}$                    | 1.5                    | $1.6 \times 10^{-1}$                   | N/A                       | 1.0 | $7.4 \times 10^{-1}$                   | $1.6 \times 10^2$      | $6.6 \times 10^{-1}$                   |
| V32A    | $9.9 \times 10^{-1}$      | $9.4 \times 10^{-1}$                   | $2.6 \times 10^5$                               | $1.2 \times 10^{-1}$                    | 2.4                    | $1.5 \times 10^{-2}$                   | N/A                       | 1.0 | $9.7 \times 10^{-1}$                   | $2.0 \times 10^2$      | $2.0 \times 10^{-1}$                   |
| V32G    | $5.2 \times 10^{-1}$      | $9.7 \times 10^{-2}$                   | $3.2 \times 10^5$                               | $2.9 \times 10^{-1}$                    | 1.2                    | $6.8 \times 10^{-1}$                   | $7.5 \times 10^{-1}$      | N/A | <b><math>2.1 \times 10^{-3}</math></b> | $1.2 \times 10^2$      | $7.5 \times 10^{-1}$                   |
| V33A    | 1.3                       | $2.8 \times 10^{-1}$                   | $1.6 \times 10^5$                               | $5.5 \times 10^{-2}$                    | 1.9                    | $1.4 \times 10^{-1}$                   | $9.7 \times 10^{-1}$      | N/A | $4.4 \times 10^{-1}$                   | $1.6 \times 10^2$      | $7.0 \times 10^{-1}$                   |
| V33G    | $3.9 \times 10^{-1}$      | <b>0</b>                               | $5.9 \times 10^5$                               | $9.1 \times 10^{-1}$                    | 1.1                    | $7.7 \times 10^{-1}$                   | $8.1 \times 10^{-1}$      | N/A | <b><math>2.0 \times 10^{-4}</math></b> | $1.0 \times 10^2$      | $4.3 \times 10^{-1}$                   |
| G34A    | $8.3 \times 10^{-1}$      | $4.3 \times 10^{-1}$                   | $8.4 \times 10^5$                               | $2.8 \times 10^{-1}$                    | $8.8 \times 10^{-1}$   | $6.4 \times 10^{-1}$                   | N/A                       | 1.0 | $4.6 \times 10^{-1}$                   | $1.4 \times 10^2$      | $9.1 \times 10^{-1}$                   |
| G34V    | $\leq 1.9 \times 10^{-1}$ | <b>0</b>                               | $\leq 1.7 \times 10^5$                          | $6.4 \times 10^{-2}$                    | -                      | -                                      | $7.1 \times 10^{-1}$      | N/A | <b>0</b>                               | $\geq 1.2 \times 10^2$ | $6.8 \times 10^{-1}$                   |
| L35G    | $\leq 1.7 \times 10^{-2}$ | <b>0</b>                               | $\leq 9.4 \times 10^4$                          | $6.5 \times 10^{-2}$                    | -                      | -                                      | N/A                       | 1.4 | <b><math>1.0 \times 10^{-3}</math></b> | $\geq 1.2 \times 10^2$ | $7.5 \times 10^{-1}$                   |
| L35V    | 1.4                       | $9.2 \times 10^{-2}$                   | $3.4 \times 10^5$                               | $9.5 \times 10^{-2}$                    | 1.3                    | $2.2 \times 10^{-1}$                   | N/A                       | 1.1 | $3.8 \times 10^{-2}$                   | $1.2 \times 10^2$      | $6.2 \times 10^{-1}$                   |
| V36A    | 1.3                       | $2.6 \times 10^{-1}$                   | $2.7 \times 10^5$                               | $9.4 \times 10^{-2}$                    | 1.4                    | $4.1 \times 10^{-1}$                   | $8.4 \times 10^{-1}$      | N/A | $5.2 \times 10^{-2}$                   | $1.2 \times 10^2$      | $6.5 \times 10^{-1}$                   |
| V36G    | $5.5 \times 10^{-1}$      | <b><math>4.0 \times 10^{-3}</math></b> | $2.5 \times 10^5$                               | $7.1 \times 10^{-2}$                    | 1.5                    | $1.7 \times 10^{-1}$                   | $3.3 \times 10^{-1}$      | N/A | <b>0</b>                               | $3.6 \times 10^1$      | <b><math>2.6 \times 10^{-2}</math></b> |
| V37A    | 1.3                       | $3.1 \times 10^{-1}$                   | $2.8 \times 10^5$                               | $8.4 \times 10^{-2}$                    | 1.3                    | $3.9 \times 10^{-1}$                   | N/A                       | 1.2 | $1.1 \times 10^{-2}$                   | $1.8 \times 10^2$      | $4.3 \times 10^{-1}$                   |
| V37G    | $8.4 \times 10^{-1}$      | $5.4 \times 10^{-1}$                   | $2.4 \times 10^5$                               | $1.0 \times 10^{-1}$                    | 1.1                    | $7.9 \times 10^{-1}$                   | $7.9 \times 10^{-1}$      | N/A | <b><math>3.0 \times 10^{-4}</math></b> | $1.3 \times 10^2$      | $8.7 \times 10^{-1}$                   |
| D38G    | $\leq 6.0 \times 10^{-1}$ | $1.1 \times 10^{-2}$                   | $\leq 1.0 \times 10^4$                          | <b><math>2.0 \times 10^{-3}</math></b>  | $\leq 1.3 \times 10^1$ | <b><math>1.7 \times 10^{-4}</math></b> | $\leq 2.1 \times 10^{-1}$ | N/A | <b>0</b>                               | $\geq 7.3$             | <b><math>2.0 \times 10^{-3}</math></b> |
| D38V    | -                         | -                                      | -                                               | -                                       | -                      | -                                      | -                         | -   | -                                      | -                      | -                                      |
| Q39G    | 1.3                       | $2.5 \times 10^{-1}$                   | $2.7 \times 10^4$                               | <b><math>6.0 \times 10^{-3}</math></b>  | 2.8                    | <b><math>8.5 \times 10^{-3}</math></b> | N/A                       | 2.2 | <b><math>1. \times 10^{-4}</math></b>  | $5.4 \times 10^1$      | $9.6 \times 10^{-2}$                   |
| Q39V    | $\leq 3.3 \times 10^{-2}$ | <b>0</b>                               | $\leq 4.7 \times 10^4$                          | <b><math>1.6 \times 10^{-2}</math></b>  | -                      | -                                      | $4.2 \times 10^{-1}$      | N/A | <b><math>3.0 \times 10^{-4}</math></b> | $\geq 6.7 \times 10^1$ | $1.2 \times 10^{-1}$                   |
| M40G    | $2.2 \times 10^{-1}$      | <b>0</b>                               | $5.7 \times 10^5$                               | $8.4 \times 10^{-1}$                    | 1.5                    | $2.5 \times 10^{-1}$                   | $6.2 \times 10^{-1}$      | N/A | <b>0</b>                               | $1.1 \times 10^2$      | $5.1 \times 10^{-1}$                   |
| M40V    | $5.1 \times 10^{-2}$      | <b>0</b>                               | $6.1 \times 10^4$                               | <b><math>2.6 \times 10^{-2}</math></b>  | -                      | -                                      | $5.2 \times 10^{-1}$      | N/A | <b><math>1. \times 10^{-4}</math></b>  | $8.5 \times 10^1$      | $2.1 \times 10^{-1}$                   |
| R41G    | 2.1                       | $5.6 \times 10^{-2}$                   | $2.1 \times 10^5$                               | $1.4 \times 10^{-1}$                    | 1.4                    | $2.2 \times 10^{-1}$                   | $8.9 \times 10^{-1}$      | N/A | $1.1 \times 10^{-1}$                   | $1.1 \times 10^2$      | $7.2 \times 10^{-1}$                   |
| R41V    | $8.4 \times 10^{-1}$      | $4.1 \times 10^{-1}$                   | $2.6 \times 10^5$                               | $8.4 \times 10^{-2}$                    | -                      | -                                      | $5.7 \times 10^{-1}$      | N/A | <b><math>3.0 \times 10^{-4}</math></b> | $7.6 \times 10^1$      | $1.0 \times 10^{-1}$                   |
| W42G    | 1.0                       | $9.5 \times 10^{-1}$                   | $2.5 \times 10^5$                               | $1.4 \times 10^{-1}$                    | $9.1 \times 10^{-1}$   | $6.7 \times 10^{-1}$                   | $6.3 \times 10^{-1}$      | N/A | <b><math>1. \times 10^{-4}</math></b>  | $5.2 \times 10^1$      | $1.6 \times 10^{-1}$                   |
| W42V    | 1.6                       | $4.2 \times 10^{-2}$                   | $4.7 \times 10^5$                               | $5.2 \times 10^{-1}$                    | $5.2 \times 10^{-1}$   | $4.3 \times 10^{-2}$                   | $8.1 \times 10^{-1}$      | N/A | $2.3 \times 10^{-2}$                   | $1.4 \times 10^2$      | $9.3 \times 10^{-1}$                   |
| D43G    | $1.8 \times 10^{-1}$      | <b>0</b>                               | $1.0 \times 10^5$                               | <b><math>3.9 \times 10^{-2}</math></b>  | 2.9                    | $1.4 \times 10^{-2}$                   | $4.9 \times 10^{-1}$      | N/A | <b>0</b>                               | $5.6 \times 10^1$      | $5.4 \times 10^{-2}$                   |
| D43V    | $1.7 \times 10^{-1}$      | <b>0</b>                               | $8.6 \times 10^4$                               | <b><math>3.1 \times 10^{-2}</math></b>  | 5.2                    | <b><math>3.0 \times 10^{-3}</math></b> | $4.5 \times 10^{-1}$      | N/A | <b>0</b>                               | $5.0 \times 10^1$      | $6.2 \times 10^{-2}$                   |
| Y44G    | $6.0 \times 10^{-1}$      | $5.8 \times 10^{-2}$                   | $4.3 \times 10^5$                               | $3.7 \times 10^{-1}$                    | $8.3 \times 10^{-1}$   | $5.7 \times 10^{-1}$                   | N/A                       | 1.1 | $2.2 \times 10^{-2}$                   | $1.1 \times 10^2$      | $6.3 \times 10^{-1}$                   |
| Y44V    | 1.2                       | $4.7 \times 10^{-1}$                   | $2.3 \times 10^5$                               | <b><math>3.6 \times 10^{-2}</math></b>  | 1.3                    | $4.3 \times 10^{-1}$                   | N/A                       | 1.0 | $5.8 \times 10^{-1}$                   | $9.8 \times 10^1$      | $2.9 \times 10^{-1}$                   |
| L45G    | $7.5 \times 10^{-1}$      | $3.4 \times 10^{-1}$                   | $1.1 \times 10^5$                               | $6.9 \times 10^{-2}$                    | 2.6                    | $1.8 \times 10^{-2}$                   | $8.7 \times 10^{-1}$      | N/A | $3.8 \times 10^{-2}$                   | $9.9 \times 10^1$      | $5.1 \times 10^{-1}$                   |
| L45V    | $4.4 \times 10^{-1}$      | <b>0</b>                               | $3.1 \times 10^5$                               | $1.9 \times 10^{-1}$                    | 1.9                    | $7.3 \times 10^{-2}$                   | $9.3 \times 10^{-1}$      | N/A | $1.9 \times 10^{-1}$                   | $1.3 \times 10^2$      | $8.5 \times 10^{-1}$                   |
| Y46G    | $2.8 \times 10^{-1}$      | <b>0</b>                               | $9.4 \times 10^5$                               | $1.4 \times 10^{-1}$                    | -                      | -                                      | $5.6 \times 10^{-1}$      | N/A | <b><math>1. \times 10^{-4}</math></b>  | $8.8 \times 10^1$      | $3.3 \times 10^{-1}$                   |
| Y46V    | 1.1                       | $7.0 \times 10^{-1}$                   | $3.1 \times 10^5$                               | $9.6 \times 10^{-2}$                    | 1.7                    | $1.0 \times 10^{-1}$                   | $9.1 \times 10^{-1}$      | N/A | $6.6 \times 10^{-2}$                   | $1.3 \times 10^2$      | $8.1 \times 10^{-1}$                   |
| R47G    | $5.9 \times 10^{-1}$      | $8.7 \times 10^{-2}$                   | $3.1 \times 10^5$                               | $2.5 \times 10^{-1}$                    | 1.4                    | $2.6 \times 10^{-1}$                   | $7.8 \times 10^{-1}$      | N/A | <b>0</b>                               | $7.5 \times 10^1$      | $2.6 \times 10^{-1}$                   |
| R47V    | 1.2                       | $3.9 \times 10^{-1}$                   | $8.1 \times 10^4$                               | <b><math>1.1 \times 10^{-2}</math></b>  | 4.6                    | <b><math>1.1 \times 10^{-3}</math></b> | $9.6 \times 10^{-1}$      | N/A | $3.5 \times 10^{-1}$                   | $1.3 \times 10^2$      | $6.8 \times 10^{-1}$                   |
| Y48G    | $2.2 \times 10^{-1}$      | <b>0</b>                               | $1.4 \times 10^5$                               | <b><math>3.0 \times 10^{-2}</math></b>  | 2.3                    | $2.7 \times 10^{-2}$                   | $6.6 \times 10^{-1}$      | N/A | <b>0</b>                               | $6.7 \times 10^1$      | $1.1 \times 10^{-1}$                   |
| Y48V    | $\leq 1.9 \times 10^{-1}$ | <b>0</b>                               | $\leq 6.0 \times 10^5$                          | $9.5 \times 10^{-1}$                    | -                      | -                                      | $9.7 \times 10^{-1}$      | N/A | $5.0 \times 10^{-1}$                   | $\geq 1.6 \times 10^2$ | $7.0 \times 10^{-1}$                   |
| Y49G    | 1.1                       | $7.6 \times 10^{-1}$                   | $2.8 \times 10^5$                               | $1.1 \times 10^{-1}$                    | $7.1 \times 10^{-1}$   | $2.6 \times 10^{-1}$                   | $8.2 \times 10^{-1}$      | N/A | <b><math>2.3 \times 10^{-3}</math></b> | $1.0 \times 10^2$      | $4.9 \times 10^{-1}$                   |
| Y49V    | 1.0                       | $8.2 \times 10^{-1}$                   | $1.8 \times 10^5$                               | <b><math>4.9 \times 10^{-2}</math></b>  | 2.5                    | $1.1 \times 10^{-2}$                   | $9.1 \times 10^{-1}$      | N/A | $1.0 \times 10^{-1}$                   | $1.1 \times 10^2$      | $4.3 \times 10^{-1}$                   |
| S50G    | $\leq 1.5$                | $9.4 \times 10^{-2}$                   | $\leq 2.0 \times 10^5$                          | $6.5 \times 10^{-2}$                    | $\leq 2.7$             | <b><math>7.7 \times 10^{-3}</math></b> | N/A                       | 1.1 | $7.8 \times 10^{-2}$                   | $\geq 1.0 \times 10^2$ | $4.1 \times 10^{-1}$                   |
| S50V    | 1.3                       | $2.4 \times 10^{-1}$                   | $1.7 \times 10^5$                               | <b><math>3.9 \times 10^{-2}</math></b>  | 2.6                    | <b><math>3.0 \times 10^{-3}</math></b> | N/A                       | 1.0 | $5.0 \times 10^{-1}$                   | $1.5 \times 10^2$      | $7.8 \times 10^{-1}$                   |
| K51G    | $6.1 \times 10^{-1}$      | $4.1 \times 10^{-2}$                   | $1.2 \times 10^5$                               | <b><math>1.8 \times 10^{-2}</math></b>  | 5.0                    | <b><math>8.0 \times 10^{-5}</math></b> | N/A                       | 1.1 | $2.6 \times 10^{-1}$                   | $1.2 \times 10^2$      | $6.2 \times 10^{-1}$                   |
| K51V    | $5.8 \times 10^{-1}$      | $3.4 \times 10^{-2}$                   | $2.3 \times 10^5$                               | $7.3 \times 10^{-2}$                    | 2.1                    | $2.0 \times 10^{-2}$                   | $8.9 \times 10^{-1}$      | N/A | $6.9 \times 10^{-2}$                   | $1.1 \times 10^2$      | $5.1 \times 10^{-1}$                   |
| Y52G    | $5.9 \times 10^{-1}$      | <b><math>9.0 \times 10^{-3}</math></b> | $2.0 \times 10^5$                               | <b><math>2.4 \times 10^{-2}</math></b>  | 1.1                    | $7.1 \times 10^{-1}$                   | $9.2 \times 10^{-1}$      | N/A | $4.7 \times 10^{-2}$                   | $1.2 \times 10^2$      | $5.9 \times 10^{-1}$                   |
| Y52V    | 1.5                       | $7.2 \times 10^{-2}$                   | $1.3 \times 10^5$                               | <b><math>1.7 \times 10^{-2}</math></b>  | 3.1                    | <b><math>3.4 \times 10^{-4}</math></b> | N/A                       | 1.1 | $6.7 \times 10^{-2}$                   | $2.0 \times 10^2$      | $1.2 \times 10^{-1}$                   |
| G53A    | $\leq 8.6 \times 10^{-1}$ | $5.0 \times 10^{-1}$                   | $\leq 4.4 \times 10^5$                          | $3.4 \times 10^{-1}$                    | $\leq 1.9$             | $2.5 \times 10^{-2}$                   | N/A                       | 1.0 | $4.6 \times 10^{-1}$                   | $\geq 1.$              |                                        |

| Variant | $f_a$                     | $f_a$ $p$ -value                       | $(k_{cat}/K_M)_{chem}^{MeP}$ ( $M^{-1}s^{-1}$ ) | $(k_{cat}/K_M)_{chem}^{MeP}$ $p$ -value | FC1                  | FC1 $p$ -value                         | FC2                  | FC3 | FC2/3 $p$ -value                       | FC4 ( $s^{-1}$ )       | FC4 $p$ -value                         |
|---------|---------------------------|----------------------------------------|-------------------------------------------------|-----------------------------------------|----------------------|----------------------------------------|----------------------|-----|----------------------------------------|------------------------|----------------------------------------|
| K58V    | $7.6 \times 10^{-1}$      | $2.9 \times 10^{-1}$                   | $2.8 \times 10^5$                               | $1.5 \times 10^{-1}$                    | 2.3                  | $2.9 \times 10^{-2}$                   | $9.9 \times 10^{-1}$ | N/A | $8.9 \times 10^{-1}$                   | $1.9 \times 10^2$      | $3.7 \times 10^{-1}$                   |
| R59G    | $1.5 \times 10^{-1}$      | <b><math>1.0 \times 10^{-3}</math></b> | $2.3 \times 10^5$                               | $1.1 \times 10^{-1}$                    | -                    | -                                      | $9.4 \times 10^{-1}$ | N/A | $2.5 \times 10^{-1}$                   | $1.2 \times 10^2$      | $7.5 \times 10^{-1}$                   |
| R59V    | $3.1 \times 10^{-1}$      | <b><math>1.0 \times 10^{-3}</math></b> | $6.2 \times 10^4$                               | <b><math>1.7 \times 10^{-2}</math></b>  | 8.3                  | <b><math>6.1 \times 10^{-4}</math></b> | $8.0 \times 10^{-1}$ | N/A | $2.4 \times 10^{-2}$                   | $9.9 \times 10^1$      | $4.4 \times 10^{-1}$                   |
| M60G    | $2.8 \times 10^{-1}$      | <b>0</b>                               | $3.4 \times 10^5$                               | $2.5 \times 10^{-1}$                    | $9.1 \times 10^{-1}$ | $7.7 \times 10^{-1}$                   | N/A                  | 1.1 | $2.5 \times 10^{-2}$                   | $1.4 \times 10^2$      | $9.8 \times 10^{-1}$                   |
| M60V    | 1.2                       | $5.3 \times 10^{-1}$                   | $3.2 \times 10^5$                               | $1.5 \times 10^{-1}$                    | $8.5 \times 10^{-1}$ | $6.3 \times 10^{-1}$                   | N/A                  | 1.3 | <b><math>2.0 \times 10^{-4}</math></b> | $1.9 \times 10^2$      | $2.4 \times 10^{-1}$                   |
| L61G    | $9.0 \times 10^{-1}$      | $7.2 \times 10^{-1}$                   | $2.7 \times 10^5$                               | $1.5 \times 10^{-1}$                    | $9.3 \times 10^{-1}$ | $8.5 \times 10^{-1}$                   | $7.6 \times 10^{-1}$ | N/A | <b><math>4.0 \times 10^{-4}</math></b> | $1.8 \times 10^2$      | $5.6 \times 10^{-1}$                   |
| L61V    | $5.4 \times 10^{-1}$      | <b><math>1.0 \times 10^{-3}</math></b> | $4.9 \times 10^5$                               | $4.6 \times 10^{-1}$                    | $8.0 \times 10^{-1}$ | $4.8 \times 10^{-1}$                   | $9.4 \times 10^{-1}$ | N/A | $8.2 \times 10^{-2}$                   | $1.4 \times 10^2$      | $9.4 \times 10^{-1}$                   |
| N62G    | $8.4 \times 10^{-1}$      | $4.8 \times 10^{-1}$                   | $3.9 \times 10^5$                               | $2.7 \times 10^{-1}$                    | 2.0                  | $1.1 \times 10^{-2}$                   | $8.1 \times 10^{-1}$ | N/A | $3.0 \times 10^{-2}$                   | $1.5 \times 10^2$      | $8.7 \times 10^{-1}$                   |
| N62V    | 1.1                       | $6.4 \times 10^{-1}$                   | $1.0 \times 10^5$                               | <b><math>1.3 \times 10^{-2}</math></b>  | 3.8                  | <b><math>1.1 \times 10^{-3}</math></b> | N/A                  | 1.1 | $1.4 \times 10^{-1}$                   | $1.8 \times 10^2$      | $3.4 \times 10^{-1}$                   |
| T63G    | 1.4                       | $3.9 \times 10^{-1}$                   | $2.2 \times 10^5$                               | $1.4 \times 10^{-1}$                    | 2.1                  | $1.2 \times 10^{-2}$                   | $8.2 \times 10^{-1}$ | N/A | <b><math>1.5 \times 10^{-3}</math></b> | $8.8 \times 10^1$      | $3.5 \times 10^{-1}$                   |
| T63V    | $8.3 \times 10^{-1}$      | $4.0 \times 10^{-1}$                   | $4.6 \times 10^5$                               | $4.1 \times 10^{-1}$                    | 1.0                  | $9.8 \times 10^{-1}$                   | N/A                  | 1.1 | $2.9 \times 10^{-1}$                   | $1.5 \times 10^2$      | $8.8 \times 10^{-1}$                   |
| G64A    | $1.1 \times 10^{-1}$      | <b>0</b>                               | $2.7 \times 10^5$                               | $8.2 \times 10^{-2}$                    | -                    | -                                      | $9.6 \times 10^{-1}$ | N/A | $3.0 \times 10^{-1}$                   | $1.3 \times 10^2$      | $8.0 \times 10^{-1}$                   |
| G64V    | -                         | -                                      | -                                               | -                                       | -                    | -                                      | -                    | -   | -                                      | -                      | -                                      |
| Y65G    | $4.2 \times 10^{-1}$      | <b>0</b>                               | $1.8 \times 10^5$                               | $6.9 \times 10^{-2}$                    | 2.7                  | <b><math>7.2 \times 10^{-3}</math></b> | $8.3 \times 10^{-1}$ | N/A | <b><math>2.5 \times 10^{-3}</math></b> | $1.4 \times 10^2$      | $9.7 \times 10^{-1}$                   |
| Y65V    | 1.0                       | $9.6 \times 10^{-1}$                   | $2.4 \times 10^5$                               | $5.9 \times 10^{-2}$                    | 1.6                  | $1.2 \times 10^{-1}$                   | N/A                  | 1.1 | $2.2 \times 10^{-1}$                   | $1.5 \times 10^2$      | $8.6 \times 10^{-1}$                   |
| S66G    | $7.9 \times 10^{-1}$      | $3.2 \times 10^{-1}$                   | $3.9 \times 10^5$                               | $2.2 \times 10^{-1}$                    | 1.6                  | $9.6 \times 10^{-2}$                   | $7.7 \times 10^{-1}$ | N/A | <b>0</b>                               | $1.1 \times 10^2$      | $5.2 \times 10^{-1}$                   |
| S66V    | $8.1 \times 10^{-1}$      | $3.3 \times 10^{-1}$                   | $4.4 \times 10^5$                               | $2.7 \times 10^{-1}$                    | $9.2 \times 10^{-1}$ | $7.6 \times 10^{-1}$                   | $9.6 \times 10^{-1}$ | N/A | $2.3 \times 10^{-1}$                   | $1.5 \times 10^2$      | $7.4 \times 10^{-1}$                   |
| L67G    | $5.2 \times 10^{-1}$      | $5.0 \times 10^{-2}$                   | $2.2 \times 10^5$                               | $1.4 \times 10^{-1}$                    | 3.0                  | <b><math>3.6 \times 10^{-3}</math></b> | $7.6 \times 10^{-1}$ | N/A | <b><math>3.0 \times 10^{-4}</math></b> | $8.1 \times 10^1$      | $3.5 \times 10^{-1}$                   |
| L67V    | $7.6 \times 10^{-1}$      | $2.0 \times 10^{-1}$                   | $2.8 \times 10^5$                               | $1.2 \times 10^{-1}$                    | 1.5                  | $2.8 \times 10^{-1}$                   | $9.8 \times 10^{-1}$ | N/A | $5.7 \times 10^{-1}$                   | $1.3 \times 10^2$      | $7.3 \times 10^{-1}$                   |
| N68G    | $5.9 \times 10^{-1}$      | $3.1 \times 10^{-2}$                   | $2.7 \times 10^5$                               | $1.4 \times 10^{-1}$                    | 2.2                  | $2.5 \times 10^{-2}$                   | N/A                  | 1.0 | $6.0 \times 10^{-1}$                   | $1.3 \times 10^2$      | $8.2 \times 10^{-1}$                   |
| N68V    | $1.6 \times 10^{-1}$      | <b>0</b>                               | $4.2 \times 10^5$                               | $4.1 \times 10^{-1}$                    | -                    | -                                      | $7.9 \times 10^{-1}$ | N/A | <b>0</b>                               | $1.1 \times 10^2$      | $5.5 \times 10^{-1}$                   |
| N69G    | $2.4 \times 10^{-1}$      | <b>0</b>                               | $4.9 \times 10^5$                               | $6.2 \times 10^{-1}$                    | 2.1                  | $4.8 \times 10^{-2}$                   | $7.4 \times 10^{-1}$ | N/A | <b><math>2.0 \times 10^{-4}</math></b> | $8.5 \times 10^1$      | $3.5 \times 10^{-1}$                   |
| N69V    | $\leq 5.0 \times 10^{-1}$ | <b><math>7.0 \times 10^{-3}</math></b> | $\leq 1.6 \times 10^5$                          | $6.2 \times 10^{-2}$                    | $\leq 2.9$           | $1.4 \times 10^{-2}$                   | $8.1 \times 10^{-1}$ | N/A | <b><math>3.7 \times 10^{-3}</math></b> | $\geq 1.2 \times 10^2$ | $6.1 \times 10^{-1}$                   |
| V70A    | 1.7                       | $5.8 \times 10^{-2}$                   | $4.9 \times 10^5$                               | $5.8 \times 10^{-1}$                    | $8.2 \times 10^{-1}$ | $5.6 \times 10^{-1}$                   | $8.2 \times 10^{-1}$ | N/A | $2.8 \times 10^{-2}$                   | $1.5 \times 10^2$      | $9.1 \times 10^{-1}$                   |
| V70G    | $4.4 \times 10^{-2}$      | <b>0</b>                               | $2.3 \times 10^5$                               | $1.3 \times 10^{-1}$                    | -                    | -                                      | $5.7 \times 10^{-1}$ | N/A | <b><math>7.0 \times 10^{-4}</math></b> | $8.5 \times 10^1$      | $3.7 \times 10^{-1}$                   |
| H71G    | 1.1                       | $7.7 \times 10^{-1}$                   | $3.5 \times 10^5$                               | $1.9 \times 10^{-1}$                    | $7.6 \times 10^{-1}$ | $4.2 \times 10^{-1}$                   | $7.1 \times 10^{-1}$ | N/A | <b><math>2.0 \times 10^{-4}</math></b> | $1.0 \times 10^2$      | $4.7 \times 10^{-1}$                   |
| H71V    | 1.1                       | $7.7 \times 10^{-1}$                   | $8.1 \times 10^5$                               | $3.2 \times 10^{-1}$                    | $4.4 \times 10^{-1}$ | <b><math>7.9 \times 10^{-3}</math></b> | $9.7 \times 10^{-1}$ | N/A | $4.9 \times 10^{-1}$                   | $1.2 \times 10^2$      | $6.5 \times 10^{-1}$                   |
| I72G    | $2.5 \times 10^{-2}$      | <b>0</b>                               | $2.4 \times 10^5$                               | $7.1 \times 10^{-2}$                    | -                    | -                                      | $8.1 \times 10^{-1}$ | N/A | <b><math>1. \times 10^{-4}</math></b>  | $2.2 \times 10^2$      | $1.0 \times 10^{-1}$                   |
| I72V    | $7.8 \times 10^{-1}$      | $2.9 \times 10^{-1}$                   | $3.2 \times 10^5$                               | $1.2 \times 10^{-1}$                    | 1.7                  | $1.3 \times 10^{-1}$                   | $5.9 \times 10^{-1}$ | N/A | <b>0</b>                               | $1.3 \times 10^2$      | $8.2 \times 10^{-1}$                   |
| D73G    | $2.6 \times 10^{-1}$      | <b>0</b>                               | $5.5 \times 10^5$                               | $8.0 \times 10^{-1}$                    | 1.1                  | $7.4 \times 10^{-1}$                   | $6.7 \times 10^{-1}$ | N/A | <b><math>1. \times 10^{-4}</math></b>  | $9.0 \times 10^1$      | $3.4 \times 10^{-1}$                   |
| D73V    | $1.8 \times 10^{-1}$      | <b>0</b>                               | $3.5 \times 10^5$                               | $1.4 \times 10^{-1}$                    | 1.3                  | $2.6 \times 10^{-1}$                   | $5.6 \times 10^{-1}$ | N/A | <b>0</b>                               | $1.4 \times 10^2$      | $9.1 \times 10^{-1}$                   |
| Y74G    | $\geq 1.2 \times 10^{-1}$ | <b>0</b>                               | $\geq 7.1 \times 10^5$                          | $5.5 \times 10^{-1}$                    | 1.8                  | $1.5 \times 10^{-2}$                   | $6.7 \times 10^{-2}$ | N/A | <b>0</b>                               | $\leq 1.2 \times 10^2$ | $6.9 \times 10^{-1}$                   |
| Y74V    | $7.2 \times 10^{-1}$      | $1.1 \times 10^{-1}$                   | $7.0 \times 10^5$                               | $6.2 \times 10^{-1}$                    | 1.6                  | $1.4 \times 10^{-1}$                   | $1.7 \times 10^{-1}$ | N/A | <b>0</b>                               | $1.6 \times 10^2$      | $6.1 \times 10^{-1}$                   |
| V75A    | $\leq 6.7 \times 10^{-1}$ | $7.6 \times 10^{-2}$                   | $\leq 8.3 \times 10^4$                          | <b><math>2.3 \times 10^{-2}</math></b>  | $\leq 2.9$           | $1.3 \times 10^{-2}$                   | $9.0 \times 10^{-1}$ | N/A | $7.8 \times 10^{-2}$                   | $\geq 1.1 \times 10^2$ | $5.7 \times 10^{-1}$                   |
| V75G    | $2.0 \times 10^{-1}$      | <b><math>1.0 \times 10^{-3}</math></b> | $1.1 \times 10^6$                               | $1.5 \times 10^{-1}$                    | -                    | -                                      | $3.4 \times 10^{-1}$ | N/A | <b><math>1. \times 10^{-4}</math></b>  | $6.0 \times 10^1$      | $2.5 \times 10^{-1}$                   |
| P76V    | $5.1 \times 10^{-2}$      | <b>0</b>                               | $1.1 \times 10^5$                               | $7.1 \times 10^{-2}$                    | -                    | -                                      | $4.1 \times 10^{-1}$ | N/A | <b><math>1. \times 10^{-4}</math></b>  | $6.6 \times 10^1$      | $1.5 \times 10^{-1}$                   |
| T77G    | $1.8 \times 10^{-1}$      | <b>0</b>                               | $1.5 \times 10^6$                               | <b><math>1.1 \times 10^{-2}</math></b>  | 1.4                  | $2.4 \times 10^{-1}$                   | $1.5 \times 10^{-1}$ | N/A | <b><math>3.0 \times 10^{-4}</math></b> | $1.4 \times 10^2$      | $9.8 \times 10^{-1}$                   |
| T77V    | $6.4 \times 10^{-1}$      | $7.3 \times 10^{-2}$                   | $3.9 \times 10^5$                               | $2.7 \times 10^{-1}$                    | 3.2                  | <b><math>1.9 \times 10^{-3}</math></b> | $4.1 \times 10^{-1}$ | N/A | <b><math>1.9 \times 10^{-3}</math></b> | $1.1 \times 10^2$      | $5.7 \times 10^{-1}$                   |
| V78A    | 2.0                       | <b><math>4.0 \times 10^{-3}</math></b> | $2.6 \times 10^4$                               | <b><math>9.0 \times 10^{-3}</math></b>  | -                    | -                                      | 1.0                  | N/A | $9.8 \times 10^{-1}$                   | $3.3 \times 10^1$      | <b><math>3.1 \times 10^{-2}</math></b> |
| V78G    | $4.6 \times 10^{-1}$      | <b><math>5.0 \times 10^{-3}</math></b> | $2.1 \times 10^5$                               | $9.3 \times 10^{-2}$                    | -                    | -                                      | $4.7 \times 10^{-1}$ | N/A | <b>0</b>                               | $4.0 \times 10^1$      | $7.3 \times 10^{-2}$                   |
| T79G    | -                         | -                                      | -                                               | -                                       | -                    | -                                      | -                    | -   | -                                      | -                      | -                                      |
| T79V    | -                         | -                                      | -                                               | -                                       | -                    | -                                      | -                    | -   | -                                      | -                      | -                                      |
| A80G    | $3.2 \times 10^{-1}$      | <b><math>1.0 \times 10^{-3}</math></b> | $7.2 \times 10^5$                               | $6.0 \times 10^{-1}$                    | 1.3                  | $3.8 \times 10^{-1}$                   | $7.2 \times 10^{-1}$ | N/A | <b><math>1. \times 10^{-4}</math></b>  | $1.3 \times 10^2$      | $8.5 \times 10^{-1}$                   |
| A80V    | $1.4 \times 10^{-1}$      | <b>0</b>                               | $1.0 \times 10^5$                               | <b><math>1.8 \times 10^{-2}</math></b>  | 2.2                  | $2.1 \times 10^{-2}$                   | N/A                  | 1.7 | <b>0</b>                               | $3.7 \times 10^1$      | <b><math>3.2 \times 10^{-2}</math></b> |
| I81G    | $6.6 \times 10^{-1}$      | $1.1 \times 10^{-1}$                   | $1.2 \times 10^6$                               | <b><math>2.9 \times 10^{-2}</math></b>  | $8.2 \times 10^{-1}$ | $5.0 \times 10^{-1}$                   | $1.1 \times 10^{-1}$ | N/A | <b><math>4.0 \times 10^{-4}</math></b> | $5.5 \times 10^1$      | $1.1 \times 10^{-1}$                   |
| I81V    | $9.5 \times 10^{-1}$      | $7.7 \times 10^{-1}$                   | $5.3 \times 10^5$                               | $6.3 \times 10^{-1}$                    | 1.3                  | $3.6 \times 10^{-1}$                   | $6.7 \times 10^{-1}$ | N/A | <b>0</b>                               | $1.4 \times 10^2$      | $9.9 \times 10^{-1}$                   |
| G82A    | $\geq 6.9 \times 10^{-2}$ | <b>0</b>                               | $\geq 1.3 \times 10^5$                          | <b><math>1.4 \times 10^{-2}</math></b>  | $1.1 \times 10^1$    | <b><math>1.5 \times 10^{-4}</math></b> | $3.4 \times 10^{-2}$ | N/A | <b>0</b>                               | $\leq 6.4 \times 10^1$ | $1.0 \times 10^{-1}$                   |
| G82V    | -                         | -                                      | -                                               | -                                       | -                    | -                                      | -                    | -   | -                                      | -                      | -                                      |
| H83G    | $\geq 2.2 \times 10^{-1}$ | <b>0</b>                               | $\geq 4.4 \times 10^5$                          | $2.8 \times 10^{-1}$                    | $2.3 \times 10^{-1}$ | <b><math>2.7 \times 10^{-3}</math></b> | $1.4 \times 10^{-2}$ | N/A | <b>0</b>                               | $\leq 2.7 \times 10^1$ | <b><math>2.9 \times 10^{-2}</math></b> |
| H83V    | 1.3                       | $2.7 \times 10^{-1}$                   | $2.0 \times 10^5$                               | $8.3 \times 10^{-2}$                    | $6.2 \times 10^{-1}$ | $1.7 \times 10^{-1}$                   | $1.5 \times 10^{-1}$ | N/A | <b>0</b>                               | $3.0 \times 10^1$      | <b><math>4.1 \times 10^{-2}</math></b> |
| T84G    | 1.4                       | $2.8 \times 10^{-1}$                   | $2.4 \times 10^5$                               | $1.5 \times 10^{-1}$                    | 2.0                  | $5.1 \times 10^{-2}$                   | N/A                  | 1.3 | <b><math>6.0 \times 10^{-4}</math></b> | $9.8 \times 10^1$      | $4.2 \times 10^{-1}$                   |
| S85G    | $7.9 \times 10^{-1}$      | $4.2 \times 10^{-1}$                   | $9.5 \times 10^5$                               | $1.2 \times 10^{-1}$                    | $5.2 \times 10^{-1}$ | $1.4 \times 10^{-2}$                   | $7.8 \times 10^{-1}$ | N/A | <b><math>1. \times 10^{-4}</math></b>  | $1.2 \times 10^2$      | $6.3 \times 10^{-1}$                   |
| S85V    | $1.9 \times 10^{-1}$      | <b>0</b>                               | $6.2 \times 10^4$                               | <b><math>2.4 \times 10^{-2}</math></b>  | 7.8                  | <b><math>3.1 \times 10^{-4}</math></b> | $7.1 \times 10^{-1}$ | N/A | <b>0</b>                               | $1.1 \times 10^2$      | $5.3 \times 10^{-1}$                   |
| I86G    | $1.3 \times 10^{-1}$      | <b>0</b>                               | $1.4 \times 10^6$                               | <b><math>3.2 \times 10^{-2}</math></b>  | 1.1                  | $7.3 \times 10^{-1}$                   | $6.1 \times 10^{-1}$ | N/A | <b>0</b>                               | $6.8 \times 10^1$      | $2.0 \times 10^{-1}$                   |
| I86V    | 1.2                       | $4.8 \times 10^{-1}$                   | $3.1 \times 10^5$                               | $1.4 \times 10^{-1}$                    | $7.8 \times 10^{-1}$ | $5.0 \times 10^{-1}$                   | $9.4 \times 10^{-1}$ | N/A | $1.7 \times 10^{-1}$                   | $1.3 \times 10^2$      | $7.4 \times 10^{-1}$                   |
| F87G    | 1.4                       | $2.4 \times 10^{-1}$                   | $4.7 \times 10^5$                               | $5.6 \times 10^{-1}$                    | $8.6 \times 10^{-1}$ | $5.2 \times 10^{-1}$                   | $5.6 \times 10^{-1}$ | N/A | <b><math>1. \times 10^{-4}</math></b>  | $8.2 \times 10^1$      | $2.2 \times 10^{-1}$                   |
| F87V    | 1.2                       | $5.3 \times 10^{-1}$                   | $3.1 \times 10^5$                               | $1.6 \times 10^{-1}$                    | 1.7                  | $1.3 \times 10^{-1}$                   | $4.7 \times 10^{-1}$ | N/A | <b>0</b>                               | $1.0 \times 10^2$      | $3.6 \times 10^{-1}$                   |
| T88G    | $1.8 \times 10^{-1}$      | <b><math>2.0 \times 10^{-3}</math></b> | $1.2 \times 10^6$                               | $8.8 \times 10^{-2}$                    | 1.0                  | $9.0 \times 10^{-1}$                   | $2.8 \times 10^{-1}$ | N/A | <b><math>4.0 \times 10^{-4}</math></b> | $6.9 \times 10^1$      | $3.5 \times 10^{-1}$                   |
| T88V    | $5.4 \times 10^{-1}$      | $2.2 \times 10^{-2}$                   | $1.3 \times 10^5$                               | <b><math>4.4 \times 10^{-2}</math></b>  | 1.7                  | $1.5 \times 10^{-1}$                   | $5.9 \times 10^{-1}$ | N/A | <b>0</b>                               | $1.1 \times 10^2$      | $5.4 \times 10^{-1}$                   |
| G89A    | $5.4 \times 10^{-1}$      | <b><math>9.0 \times 10^{-3}</math></b> | $6.5 \times 10^5$                               | $8.5 \times 10^{-1}$                    | 1.5                  | $2.3 \times 10^{-1}$                   | N/A                  | 1.1 | $1.4 \times 10^{-1}$                   | $1.1 \times 10^2$      | $5.1 \times 10^{-1}$                   |
| G89V    | -                         | -                                      | -                                               | -                                       | -                    | -                                      | -                    | -   | -                                      | -                      | -                                      |
| S90G    | $7.8 \times 10^{-1}$      | $2.3 \times 10^{-1}$                   | $6.5 \times 10^5$                               | $7.8 \times 10^{-1}$                    | $6.2 \times 10^{-1}$ | $1.2 \times 10^{-1}$                   | $6.3 \times 10^{-1}$ | N/A | <b>0</b>                               | $7.6 \times 10^1$      | $1.6 \times 10^{-1}$                   |
| S90V    | $1.9 \times 10^{-1}$      | <b>0</b>                               | $4.5 \times 10^5$                               | $5.9 \times 10^{-1}$                    | -                    | -                                      | $7.7 \times 10^{-1}$ | N/A | $3.8 \times 10^{-2}$                   | $1.3 \times 10^2$      | $8.3 \times 10^{-1}$                   |
| V91A    | $\leq 7.4 \times 10^{-1}$ | $1.6 \times 10^{-1}$                   | $\leq 1.1 \times 10^5$                          | <b><math>3.4 \times 10^{-2}</math></b>  | $\leq 2.9$           | $1.5 \times 10^{-2}$                   | $7.6 \times 10^{-1}$ | N/A | <b><math>3.0 \times 10^{-4}</math></b> | $\geq 9.9 \times 10^1$ | $3.1 \times 10^{-1}$                   |
| V91G    | $6.7 \times 10^{-2}$      | <b>0</b>                               | $2.8 \times 10^5$                               | $8.2 \times 10^{-2}$                    | -                    | -                                      | $5.6 \times 10^{-1}$ | N/A | <b>0</b>                               | $8.0 \times 10^1$      | $1.7 \times 10^{-1}$                   |
| P92G    | $1.6 \times 10^{-1}$      | <b>0</b>                               | $5.8 \times 10^5$                               | $8.7 \times 10^{-1}$                    | 1.2                  | $6.1 \times 10^{-1}$                   | $5.9 \times 10^{-1}$ | N/A | <b>0</b>                               | $8.3 \times 10^1$      | $1.8 \times 10^{-1}$                   |
| P92V    | $\leq 8.6 \times 10^{-2}$ | <b>0</b>                               |                                                 |                                         |                      |                                        |                      |     |                                        |                        |                                        |

| Variant | $f_a$                     | $f_a$ p-value                          | $(k_{cat}/K_M)_{chem}^{MEP}$ ( $M^{-1}s^{-1}$ ) | $(k_{cat}/K_M)_{chem}^{MEP}$ p-value   | FC1                    | FC1 p-value                            | FC2                       | FC3        | FC2/3 p-value                          | FC4 ( $s^{-1}$ )       | FC4 p-value                            |
|---------|---------------------------|----------------------------------------|-------------------------------------------------|----------------------------------------|------------------------|----------------------------------------|---------------------------|------------|----------------------------------------|------------------------|----------------------------------------|
| I97G    | -                         | -                                      | -                                               | -                                      | -                      | -                                      | -                         | -          | -                                      | -                      | -                                      |
| I97V    | 1.2                       | $4.2 \times 10^{-1}$                   | $3.6 \times 10^5$                               | $1.2 \times 10^{-1}$                   | 1.3                    | $4.2 \times 10^{-1}$                   | $9.3 \times 10^{-1}$      | N/A        | $2.3 \times 10^{-1}$                   | $1.5 \times 10^2$      | $8.1 \times 10^{-1}$                   |
| A98G    | $5.7 \times 10^{-1}$      | $8.2 \times 10^{-2}$                   | $4.3 \times 10^5$                               | $4.8 \times 10^{-1}$                   | 1.5                    | $1.2 \times 10^{-1}$                   | $8.6 \times 10^{-1}$      | N/A        | $1.2 \times 10^{-2}$                   | $1.0 \times 10^2$      | $5.4 \times 10^{-1}$                   |
| A98V    | $8.8 \times 10^{-1}$      | $6.7 \times 10^{-1}$                   | $5.0 \times 10^5$                               | $5.5 \times 10^{-1}$                   | 1.1                    | $7.8 \times 10^{-1}$                   | $8.1 \times 10^{-1}$      | N/A        | <b><math>7.0 \times 10^{-4}</math></b> | $1.6 \times 10^2$      | $6.5 \times 10^{-1}$                   |
| G99A    | $7.2 \times 10^{-1}$      | $2.4 \times 10^{-1}$                   | $3.8 \times 10^5$                               | $3.4 \times 10^{-1}$                   | 1.5                    | $1.8 \times 10^{-1}$                   | N/A                       | 1.4        | <b><math>2.0 \times 10^{-4}</math></b> | $1.7 \times 10^2$      | $5.5 \times 10^{-1}$                   |
| G99V    | $\leq 1.1 \times 10^{-1}$ | <b>0</b>                               | $\leq 1.9 \times 10^4$                          | <b><math>9.0 \times 10^{-3}</math></b> | $\leq 3.2 \times 10^1$ | <b><math>2.0 \times 10^{-4}</math></b> | $1.6 \times 10^{-1}$      | N/A        | <b>0</b>                               | $\geq 1.3 \times 10^1$ | <b><math>3.6 \times 10^{-2}</math></b> |
| N100G   | $2.3 \times 10^{-1}$      | <b>0</b>                               | $7.6 \times 10^3$                               | <b><math>1.0 \times 10^{-2}</math></b> | $2.6 \times 10^1$      | <b><math>1.2 \times 10^{-3}</math></b> | $\leq 5.9 \times 10^{-1}$ | N/A        | <b>0</b>                               | $\geq 5.8$             | <b><math>1.8 \times 10^{-2}</math></b> |
| N100V   | $\leq 3.4 \times 10^{-1}$ | <b><math>1.0 \times 10^{-3}</math></b> | $\leq 4.8 \times 10^3$                          | <b><math>1.6 \times 10^{-2}</math></b> | -                      | -                                      | N/A                       | $\leq 1.3$ | <b>0</b>                               | $\geq 5.2$             | <b><math>2.1 \times 10^{-2}</math></b> |
| D101G   | $9.4 \times 10^{-1}$      | $8.0 \times 10^{-1}$                   | $1.2 \times 10^5$                               | $7.8 \times 10^{-2}$                   | 8.7                    | <b><math>1.0 \times 10^{-5}</math></b> | N/A                       | 1.2        | <b><math>6.8 \times 10^{-3}</math></b> | $4.5 \times 10^1$      | $1.2 \times 10^{-1}$                   |
| D101V   | 1.6                       | $1.0 \times 10^{-2}$                   | $1.0 \times 10^5$                               | <b><math>3.0 \times 10^{-3}</math></b> | 3.6                    | <b><math>1.4 \times 10^{-4}</math></b> | N/A                       | 1.6        | <b>0</b>                               | $9.1 \times 10^1$      | $1.3 \times 10^{-1}$                   |
| W102G   | -                         | -                                      | -                                               | -                                      | -                      | -                                      | -                         | -          | -                                      | -                      | -                                      |
| W102V   | $4.1 \times 10^{-2}$      | <b>0</b>                               | $9.1 \times 10^4$                               | <b><math>1.9 \times 10^{-2}</math></b> | -                      | -                                      | N/A                       | 1.2        | <b><math>4.0 \times 10^{-4}</math></b> | $4.5 \times 10^1$      | $5.8 \times 10^{-2}$                   |
| Y103G   | $2.0 \times 10^{-1}$      | <b>0</b>                               | $1.3 \times 10^5$                               | <b><math>3.4 \times 10^{-2}</math></b> | 2.7                    | $1.1 \times 10^{-2}$                   | $6.2 \times 10^{-1}$      | N/A        | <b><math>1. \times 10^{-4}</math></b>  | $5.3 \times 10^1$      | $7.2 \times 10^{-2}$                   |
| Y103V   | $7.6 \times 10^{-1}$      | $2.6 \times 10^{-1}$                   | $1.7 \times 10^5$                               | $5.3 \times 10^{-2}$                   | 1.6                    | $1.9 \times 10^{-1}$                   | $7.6 \times 10^{-1}$      | N/A        | <b>0</b>                               | $1.5 \times 10^2$      | $9.3 \times 10^{-1}$                   |
| D104G   | $4.8 \times 10^{-1}$      | $1.5 \times 10^{-2}$                   | $3.7 \times 10^5$                               | $2.7 \times 10^{-1}$                   | 2.2                    | $2.3 \times 10^{-2}$                   | $8.0 \times 10^{-1}$      | N/A        | <b><math>1. \times 10^{-4}</math></b>  | $1.1 \times 10^2$      | $5.1 \times 10^{-1}$                   |
| D104V   | 1.1                       | $7.9 \times 10^{-1}$                   | $1.0 \times 10^5$                               | <b><math>3.1 \times 10^{-2}</math></b> | -                      | -                                      | N/A                       | 1.4        | <b>0</b>                               | $1.4 \times 10^2$      | $9.2 \times 10^{-1}$                   |
| K105G   | 1.5                       | $1.1 \times 10^{-1}$                   | $3.6 \times 10^5$                               | $1.5 \times 10^{-1}$                   | 1.8                    | $4.5 \times 10^{-2}$                   | N/A                       | 1.1        | $3.4 \times 10^{-1}$                   | $1.4 \times 10^2$      | $9.7 \times 10^{-1}$                   |
| K105V   | 1.9                       | $1.4 \times 10^{-2}$                   | $3.6 \times 10^5$                               | $1.8 \times 10^{-1}$                   | $9.7 \times 10^{-1}$   | $9.5 \times 10^{-1}$                   | N/A                       | 1.0        | $7.9 \times 10^{-1}$                   | $1.3 \times 10^2$      | $9.1 \times 10^{-1}$                   |
| E106G   | $9.5 \times 10^{-1}$      | $8.2 \times 10^{-1}$                   | $2.6 \times 10^5$                               | $8.9 \times 10^{-2}$                   | 2.8                    | <b><math>1.5 \times 10^{-3}</math></b> | $8.7 \times 10^{-1}$      | N/A        | $4.2 \times 10^{-2}$                   | $1.4 \times 10^2$      | $9.6 \times 10^{-1}$                   |
| E106V   | $4.2 \times 10^{-1}$      | <b><math>2.0 \times 10^{-3}</math></b> | $1.1 \times 10^6$                               | <b><math>3.3 \times 10^{-2}</math></b> | $8.5 \times 10^{-1}$   | $6.8 \times 10^{-1}$                   | $8.7 \times 10^{-1}$      | N/A        | <b><math>7.1 \times 10^{-3}</math></b> | $1.4 \times 10^2$      | $9.9 \times 10^{-1}$                   |
| L107G   | 1.5                       | $1.4 \times 10^{-1}$                   | $2.9 \times 10^5$                               | $1.2 \times 10^{-1}$                   | 2.3                    | <b><math>4.9 \times 10^{-3}</math></b> | $7.3 \times 10^{-1}$      | N/A        | <b><math>2.0 \times 10^{-4}</math></b> | $8.2 \times 10^1$      | $2.6 \times 10^{-1}$                   |
| L107V   | 1.0                       | $8.6 \times 10^{-1}$                   | $6.1 \times 10^5$                               | $9.9 \times 10^{-1}$                   | $8.1 \times 10^{-1}$   | $4.5 \times 10^{-1}$                   | N/A                       | 1.1        | $1.5 \times 10^{-1}$                   | $1.7 \times 10^2$      | $5.5 \times 10^{-1}$                   |
| G108A   | $9.4 \times 10^{-1}$      | $7.5 \times 10^{-1}$                   | $2.8 \times 10^5$                               | $1.7 \times 10^{-1}$                   | 1.1                    | $8.3 \times 10^{-1}$                   | $8.7 \times 10^{-1}$      | N/A        | $1.5 \times 10^{-2}$                   | $8.5 \times 10^1$      | $2.9 \times 10^{-1}$                   |
| G108V   | $9.9 \times 10^{-1}$      | $9.0 \times 10^{-1}$                   | $3.9 \times 10^5$                               | $1.6 \times 10^{-1}$                   | $8.8 \times 10^{-1}$   | $7.1 \times 10^{-1}$                   | N/A                       | 1.1        | $2.2 \times 10^{-1}$                   | $1.6 \times 10^2$      | $6.0 \times 10^{-1}$                   |
| K109G   | 1.8                       | $2.5 \times 10^{-2}$                   | $4.0 \times 10^5$                               | $2.8 \times 10^{-1}$                   | 1.1                    | $5.4 \times 10^{-1}$                   | N/A                       | 1.3        | <b><math>7.0 \times 10^{-4}</math></b> | $1.5 \times 10^2$      | $8.9 \times 10^{-1}$                   |
| K109V   | 1.4                       | $1.4 \times 10^{-1}$                   | $4.2 \times 10^5$                               | $2.5 \times 10^{-1}$                   | 1.0                    | $9.2 \times 10^{-1}$                   | $9.7 \times 10^{-1}$      | N/A        | $4.4 \times 10^{-1}$                   | $1.3 \times 10^2$      | $7.3 \times 10^{-1}$                   |
| S110G   | 1.2                       | $4.2 \times 10^{-1}$                   | $5.4 \times 10^5$                               | $6.8 \times 10^{-1}$                   | 1.2                    | $5.5 \times 10^{-1}$                   | $7.4 \times 10^{-1}$      | N/A        | <b><math>1. \times 10^{-4}</math></b>  | $1.4 \times 10^2$      | $9.4 \times 10^{-1}$                   |
| S110V   | 1.2                       | $5.3 \times 10^{-1}$                   | $3.5 \times 10^5$                               | $1.9 \times 10^{-1}$                   | 1.1                    | $6.6 \times 10^{-1}$                   | N/A                       | 1.9        | <b>0</b>                               | $8.4 \times 10^1$      | $1.5 \times 10^{-1}$                   |
| V111A   | 1.2                       | $4.7 \times 10^{-1}$                   | $1.5 \times 10^5$                               | <b><math>1.8 \times 10^{-2}</math></b> | 2.8                    | <b><math>1.1 \times 10^{-3}</math></b> | N/A                       | 1.2        | <b><math>2.1 \times 10^{-3}</math></b> | $1.4 \times 10^2$      | $9.0 \times 10^{-1}$                   |
| V111G   | $7.4 \times 10^{-2}$      | <b>0</b>                               | $1.4 \times 10^6$                               | <b><math>2.8 \times 10^{-2}</math></b> | 2.0                    | $4.7 \times 10^{-2}$                   | N/A                       | 3.6        | <b>0</b>                               | $1.3 \times 10^2$      | $8.7 \times 10^{-1}$                   |
| Y112G   | $4.8 \times 10^{-1}$      | <b>0</b>                               | $5.4 \times 10^4$                               | <b><math>7.0 \times 10^{-3}</math></b> | $4.7 \times 10^1$      | <b>0</b>                               | N/A                       | 3.7        | <b>0</b>                               | $3.9 \times 10^1$      | <b><math>2.7 \times 10^{-2}</math></b> |
| Y112V   | $3.2 \times 10^{-1}$      | <b>0</b>                               | $4.6 \times 10^4$                               | <b><math>1.8 \times 10^{-2}</math></b> | $2.3 \times 10^1$      | <b><math>1.4 \times 10^{-4}</math></b> | N/A                       | 7.4        | <b>0</b>                               | $1.1 \times 10^2$      | $5.3 \times 10^{-1}$                   |
| C113G   | $9.1 \times 10^{-1}$      | $7.7 \times 10^{-1}$                   | $2.3 \times 10^5$                               | $1.2 \times 10^{-1}$                   | 2.5                    | <b><math>3.9 \times 10^{-3}</math></b> | N/A                       | 1.2        | <b><math>8.4 \times 10^{-3}</math></b> | $1.1 \times 10^2$      | $5.8 \times 10^{-1}$                   |
| C113V   | 1.8                       | $1.0 \times 10^{-2}$                   | $3.1 \times 10^5$                               | $9.2 \times 10^{-2}$                   | 1.4                    | $2.8 \times 10^{-1}$                   | $7.6 \times 10^{-1}$      | N/A        | <b><math>4.8 \times 10^{-3}</math></b> | $2.1 \times 10^2$      | $1.0 \times 10^{-1}$                   |
| T114G   | $\leq 2.3 \times 10^{-1}$ | <b>0</b>                               | $\leq 6.4 \times 10^3$                          | <b><math>8.0 \times 10^{-3}</math></b> | $\leq 9.1 \times 10^1$ | <b>0</b>                               | $\leq 9.6 \times 10^{-1}$ | N/A        | $2.9 \times 10^{-1}$                   | $\geq 5.8$             | <b><math>2.1 \times 10^{-2}</math></b> |
| T114V   | $9.7 \times 10^{-1}$      | $8.4 \times 10^{-1}$                   | $5.5 \times 10^5$                               | $7.4 \times 10^{-1}$                   | 3.0                    | <b><math>3.5 \times 10^{-4}</math></b> | $5.9 \times 10^{-1}$      | N/A        | <b><math>6.0 \times 10^{-4}</math></b> | $1.3 \times 10^2$      | $7.4 \times 10^{-1}$                   |
| S115G   | 1.1                       | $7.3 \times 10^{-1}$                   | $4.1 \times 10^5$                               | $3.1 \times 10^{-1}$                   | 1.7                    | $1.2 \times 10^{-1}$                   | $9.4 \times 10^{-1}$      | N/A        | $1.9 \times 10^{-1}$                   | $9.0 \times 10^1$      | $2.7 \times 10^{-1}$                   |
| S115V   | $7.4 \times 10^{-1}$      | $2.4 \times 10^{-1}$                   | $5.8 \times 10^5$                               | $8.6 \times 10^{-1}$                   | 1.1                    | $7.6 \times 10^{-1}$                   | N/A                       | 3.0        | <b>0</b>                               | $1.6 \times 10^2$      | $6.4 \times 10^{-1}$                   |
| D116G   | $\leq 1.3 \times 10^{-2}$ | <b>0</b>                               | $\leq 9.2 \times 10^4$                          | $5.5 \times 10^{-2}$                   | -                      | -                                      | $\leq 8.6 \times 10^{-1}$ | N/A        | $2.1 \times 10^{-1}$                   | $\geq 7.0$             | $8.5 \times 10^{-2}$                   |
| D116V   | $\leq 1.5 \times 10^{-1}$ | <b>0</b>                               | $\leq 6.1 \times 10^4$                          | <b><math>4.1 \times 10^{-2}</math></b> | -                      | -                                      | -                         | -          | -                                      | -                      | -                                      |
| E117G   | 1.3                       | $2.7 \times 10^{-1}$                   | $2.9 \times 10^5$                               | $9.6 \times 10^{-2}$                   | 1.8                    | $3.9 \times 10^{-2}$                   | $9.2 \times 10^{-1}$      | N/A        | $6.8 \times 10^{-2}$                   | $5.7 \times 10^1$      | $9.2 \times 10^{-2}$                   |
| E117V   | 1.2                       | $4.5 \times 10^{-1}$                   | $4.4 \times 10^5$                               | $3.3 \times 10^{-1}$                   | $9.0 \times 10^{-1}$   | $8.2 \times 10^{-1}$                   | N/A                       | 1.1        | $2.4 \times 10^{-1}$                   | $1.5 \times 10^2$      | $7.7 \times 10^{-1}$                   |
| T118G   | 1.4                       | $1.8 \times 10^{-1}$                   | $3.5 \times 10^5$                               | $1.3 \times 10^{-1}$                   | 1.0                    | $8.5 \times 10^{-1}$                   | $8.8 \times 10^{-1}$      | N/A        | $1.2 \times 10^{-1}$                   | $8.3 \times 10^1$      | $2.2 \times 10^{-1}$                   |
| T118V   | 1.1                       | $5.9 \times 10^{-1}$                   | $4.4 \times 10^5$                               | $3.3 \times 10^{-1}$                   | 1.1                    | $8.4 \times 10^{-1}$                   | $9.8 \times 10^{-1}$      | N/A        | $6.6 \times 10^{-1}$                   | $1.6 \times 10^2$      | $6.5 \times 10^{-1}$                   |
| V119A   | 1.3                       | $3.1 \times 10^{-1}$                   | $4.7 \times 10^5$                               | $4.6 \times 10^{-1}$                   | 1.4                    | $3.3 \times 10^{-1}$                   | N/A                       | 1.2        | $1.4 \times 10^{-2}$                   | $2.1 \times 10^2$      | $1.3 \times 10^{-1}$                   |
| V119G   | $7.1 \times 10^{-2}$      | <b>0</b>                               | $1.2 \times 10^6$                               | $5.7 \times 10^{-2}$                   | 3.0                    | <b><math>4.0 \times 10^{-3}</math></b> | N/A                       | 1.2        | $1.5 \times 10^{-2}$                   | $1.2 \times 10^2$      | $7.6 \times 10^{-1}$                   |
| Q120G   | 1.4                       | $1.4 \times 10^{-1}$                   | $3.7 \times 10^5$                               | $2.3 \times 10^{-1}$                   | 1.5                    | $1.5 \times 10^{-1}$                   | $9.2 \times 10^{-1}$      | N/A        | $1.1 \times 10^{-1}$                   | $8.8 \times 10^1$      | $2.8 \times 10^{-1}$                   |
| Q120V   | 1.1                       | $7.0 \times 10^{-1}$                   | $4.9 \times 10^5$                               | $3.3 \times 10^{-1}$                   | $8.5 \times 10^{-1}$   | $5.5 \times 10^{-1}$                   | N/A                       | 1.1        | $1.4 \times 10^{-2}$                   | $1.8 \times 10^2$      | $2.9 \times 10^{-1}$                   |
| P121G   | 1.2                       | $5.5 \times 10^{-1}$                   | $9.5 \times 10^5$                               | $1.4 \times 10^{-1}$                   | $4.5 \times 10^{-1}$   | $2.0 \times 10^{-2}$                   | $9.0 \times 10^{-1}$      | N/A        | $2.0 \times 10^{-1}$                   | $8.2 \times 10^1$      | $3.4 \times 10^{-1}$                   |
| P121V   | $7.3 \times 10^{-1}$      | $1.1 \times 10^{-1}$                   | $7.4 \times 10^5$                               | $3.7 \times 10^{-1}$                   | 1.0                    | $8.9 \times 10^{-1}$                   | N/A                       | 1.0        | $5.9 \times 10^{-1}$                   | $1.4 \times 10^2$      | $9.8 \times 10^{-1}$                   |
| V122A   | 1.1                       | $6.7 \times 10^{-1}$                   | $2.0 \times 10^5$                               | $6.7 \times 10^{-2}$                   | 1.9                    | $5.7 \times 10^{-2}$                   | $9.8 \times 10^{-1}$      | N/A        | $6.2 \times 10^{-1}$                   | $1.6 \times 10^2$      | $7.5 \times 10^{-1}$                   |
| V122G   | $2.8 \times 10^{-1}$      | <b>0</b>                               | $1.1 \times 10^5$                               | <b><math>1.7 \times 10^{-2}</math></b> | 3.2                    | <b><math>1.6 \times 10^{-3}</math></b> | $3.9 \times 10^{-1}$      | N/A        | <b>0</b>                               | 8.8                    | <b><math>1.9 \times 10^{-2}</math></b> |
| G123A   | $9.3 \times 10^{-1}$      | $7.9 \times 10^{-1}$                   | $3.1 \times 10^5$                               | $1.6 \times 10^{-1}$                   | 2.3                    | <b><math>5.2 \times 10^{-3}</math></b> | $9.7 \times 10^{-1}$      | N/A        | $4.7 \times 10^{-1}$                   | $1.1 \times 10^2$      | $6.2 \times 10^{-1}$                   |
| G123V   | 1.4                       | $2.3 \times 10^{-1}$                   | $1.2 \times 10^5$                               | <b><math>3.2 \times 10^{-2}</math></b> | 2.3                    | $2.9 \times 10^{-2}$                   | $9.3 \times 10^{-1}$      | N/A        | $1.4 \times 10^{-1}$                   | $7.7 \times 10^1$      | $2.1 \times 10^{-1}$                   |
| T124G   | 1.2                       | $4.3 \times 10^{-1}$                   | $2.5 \times 10^5$                               | $1.3 \times 10^{-1}$                   | 2.6                    | <b><math>2.3 \times 10^{-3}</math></b> | N/A                       | 1.0        | $6.7 \times 10^{-1}$                   | $7.6 \times 10^1$      | $2.0 \times 10^{-1}$                   |
| T124V   | 1.4                       | $1.8 \times 10^{-1}$                   | $2.6 \times 10^5$                               | $7.8 \times 10^{-2}$                   | 1.3                    | $3.8 \times 10^{-1}$                   | $8.5 \times 10^{-1}$      | N/A        | $1.5 \times 10^{-2}$                   | $1.1 \times 10^2$      | $4.9 \times 10^{-1}$                   |
| T125G   | 1.6                       | $1.2 \times 10^{-1}$                   | $2.7 \times 10^5$                               | $1.2 \times 10^{-1}$                   | 2.0                    | $2.1 \times 10^{-2}$                   | $9.0 \times 10^{-1}$      | N/A        | $8.4 \times 10^{-2}$                   | $8.2 \times 10^1$      | $3.2 \times 10^{-1}$                   |
| T125V   | $8.9 \times 10^{-1}$      | $6.7 \times 10^{-1}$                   | $7.2 \times 10^5$                               | $5.3 \times 10^{-1}$                   | $6.0 \times 10^{-1}$   | $1.4 \times 10^{-1}$                   | N/A                       | 1.1        | $2.4 \times 10^{-1}$                   | $1.7 \times 10^2$      | $5.1 \times 10^{-1}$                   |
| S126G   | $5.8 \times 10^{-1}$      | $4.1 \times 10^{-2}$                   | $6.6 \times 10^5$                               | $7.8 \times 10^{-1}$                   | 2.3                    | <b><math>4.6 \times 10^{-3}</math></b> | $9.6 \times 10^{-1}$      | N/A        | $4.8 \times 10^{-1}$                   | $1.5 \times 10^2$      | $7.9 \times 10^{-1}$                   |
| S126V   | $9.9 \times 10^{-1}$      | $9.5 \times 10^{-1}$                   | $7.9 \times 10^5$                               | $3.9 \times 10^{-1}$                   | $7.9 \times 10^{-1}$   | $5.4 \times 10^{-1}$                   | N/A                       | 1.1        | $1.3 \times 10^{-1}$                   | $1.9 \times 10^2$      | $2.7 \times 10^{-1}$                   |
| N127G   | 1.1                       | $7.6 \times 10^{-1}$                   | $4.8 \times 10^5$                               | $5.2 \times 10^{-1}$                   | 1.5                    | $1.1 \times 10^{-1}$                   | N/A                       | 1.3        | <b><math>7.0 \times 10^{-4}</math></b> | $1.0 \times 10^2$      | $4.5 \times 10^{-1}$                   |
| N127V   | 1.1                       | $8.5 \times 10^{-1}$                   | $6.4 \times 10^5$                               | $9.1 \times 10^{-1}$                   | $7.5 \times 10^{-1}$   | $4.2 \times 10^{-1}$                   | N/A                       | 1.0        | $5.9 \times 10^{-1}$                   | $1.7 \times 10^2$      | $5.2 \times 10^{-1}$                   |
| S128G   | 1.4                       | $2.4 \times 10^{-1}$                   | $2.9 \times 10^5$                               | $1.3 \times 10^{-1}$                   | 2.0                    | $1.5 \times 10^{-2}$                   | N/A                       | 1.0        | $6.7 \times 10^{-1}$                   | $1.2 \times 10^2$      | $7.0 \times 10^{-1}$                   |
| S128V   | $8.6 \times 10^{-1}$      | $5.6 \times 10^{-1}$                   | $4.4 \times 10^5$                               | $4.1 \times 10^{-1}$                   | 1.1                    | $8.3 \times 10^{-1}$                   | N/A                       | 1.1        | $3.0 \times 10^{-2}$                   | $1.1 \times 10^2$      | $4.8 \times 10^{-1}$                   |
| V129A   | 1.2                       | $4.9 \times 10^{-1}$                   | $3.0 \times 10^5$                               | $1.0 \times 10^{-1}$                   | 2.7                    | <b><math>1.9 \times 10^{-3}</math></b> | N/A                       | 1.1        | $3.7 \times 10^{-2}$                   | $1.9 \times 10^2$      | $2.4 \times 10^{-1}$                   |
| V129G   | $4.8 \times 10^{-1}$      | $1.8 \times 10^{-2}$                   | $1.0 \times 10^6$                               | $9.4 \times 10^{-2}$                   | 1.0                    | $8.7 \times 10^{-1}$                   | $9.6 \times 10^{-1}$      | N/A        |                                        |                        |                                        |

| Variant | $f_a$                  | $f_a$ $p$ -value           | $(k_{cat}/K_M)_{chem}^{MEP}$ ( $M^{-1}s^{-1}$ ) | $(k_{cat}/K_M)_{chem}^{MEP}$ $p$ -value | FC1                   | FC1 $p$ -value             | FC2                  | FC3                   | FC2/3 $p$ -value           | FC4 ( $s^{-1}$ )      | FC4 $p$ -value             |
|---------|------------------------|----------------------------|-------------------------------------------------|-----------------------------------------|-----------------------|----------------------------|----------------------|-----------------------|----------------------------|-----------------------|----------------------------|
| R135G   | 2.3                    | <b>2.0×10<sup>-3</sup></b> | 2.4×10 <sup>5</sup>                             | 7.4×10 <sup>-2</sup>                    | 2.6                   | <b>1.8×10<sup>-3</sup></b> | 9.6×10 <sup>-1</sup> | N/A                   | 3.7×10 <sup>-1</sup>       | 1.2×10 <sup>2</sup>   | 7.5×10 <sup>-1</sup>       |
| R135V   | 1.4                    | 2.1×10 <sup>-1</sup>       | 6.2×10 <sup>5</sup>                             | 9.6×10 <sup>-1</sup>                    | 1.0                   | 8.9×10 <sup>-1</sup>       | N/A                  | 1.1                   | 3.4×10 <sup>-2</sup>       | 2.1×10 <sup>2</sup>   | 1.6×10 <sup>-1</sup>       |
| N136G   | 6.1×10 <sup>-1</sup>   | 3.5×10 <sup>-2</sup>       | 5.6×10 <sup>5</sup>                             | 7.9×10 <sup>-1</sup>                    | 1.2                   | 5.5×10 <sup>-1</sup>       | 9.4×10 <sup>-1</sup> | N/A                   | 3.2×10 <sup>-1</sup>       | 8.5×10 <sup>1</sup>   | 2.5×10 <sup>-1</sup>       |
| N136V   | 3.4×10 <sup>-1</sup>   | <b>5.0×10<sup>-3</sup></b> | 5.4×10 <sup>5</sup>                             | 7.0×10 <sup>-1</sup>                    | 1.2                   | 7.6×10 <sup>-1</sup>       | N/A                  | 1.1                   | 4.3×10 <sup>-2</sup>       | 7.3×10 <sup>1</sup>   | 2.0×10 <sup>-1</sup>       |
| L137G   | 2.6×10 <sup>-1</sup>   | <b>0</b>                   | 2.8×10 <sup>5</sup>                             | 1.6×10 <sup>-1</sup>                    | 4.2                   | <b>4.8×10<sup>-3</sup></b> | 7.7×10 <sup>-1</sup> | N/A                   | <b>3.8×10<sup>-3</sup></b> | 9.3×10 <sup>1</sup>   | 4.5×10 <sup>-1</sup>       |
| L137V   | 1.1                    | 7.5×10 <sup>-1</sup>       | 4.6×10 <sup>5</sup>                             | 4.2×10 <sup>-1</sup>                    | 1.2                   | 4.8×10 <sup>-1</sup>       | N/A                  | 1.1                   | 1.1×10 <sup>-2</sup>       | 1.7×10 <sup>2</sup>   | 5.1×10 <sup>-1</sup>       |
| W138G   | 3.3×10 <sup>-1</sup>   | <b>0</b>                   | 3.1×10 <sup>5</sup>                             | 1.1×10 <sup>-1</sup>                    | 1.7                   | 4.5×10 <sup>-2</sup>       | 7.0×10 <sup>-1</sup> | N/A                   | <b>0</b>                   | 5.1×10 <sup>1</sup>   | 5.9×10 <sup>-2</sup>       |
| W138V   | 3.6×10 <sup>-1</sup>   | <b>0</b>                   | 2.7×10 <sup>5</sup>                             | 9.9×10 <sup>-2</sup>                    | 1.8                   | 7.7×10 <sup>-2</sup>       | 8.6×10 <sup>-1</sup> | N/A                   | 1.3×10 <sup>-2</sup>       | 1.1×10 <sup>2</sup>   | 5.8×10 <sup>-1</sup>       |
| S139G   | 3.4×10 <sup>-1</sup>   | <b>3.0×10<sup>-3</sup></b> | 7.2×10 <sup>5</sup>                             | 6.4×10 <sup>-1</sup>                    | 1.5                   | 1.4×10 <sup>-1</sup>       | 6.4×10 <sup>-1</sup> | N/A                   | <b>1.0×10<sup>-3</sup></b> | 1.4×10 <sup>2</sup>   | 9.3×10 <sup>-1</sup>       |
| S139V   | 1.2                    | 4.7×10 <sup>-1</sup>       | 3.4×10 <sup>5</sup>                             | 1.1×10 <sup>-1</sup>                    | 1.1                   | 7.7×10 <sup>-1</sup>       | 9.6×10 <sup>-1</sup> | N/A                   | 3.5×10 <sup>-1</sup>       | 1.4×10 <sup>2</sup>   | 9.0×10 <sup>-1</sup>       |
| T140G   | 3.8×10 <sup>-1</sup>   | <b>4.0×10<sup>-3</sup></b> | 3.5×10 <sup>5</sup>                             | 2.1×10 <sup>-1</sup>                    | 1.9                   | 4.0×10 <sup>-2</sup>       | 7.2×10 <sup>-1</sup> | N/A                   | <b>2.0×10<sup>-4</sup></b> | 5.7×10 <sup>1</sup>   | 1.4×10 <sup>-1</sup>       |
| T140V   | 3.7×10 <sup>-1</sup>   | <b>0</b>                   | 6.0×10 <sup>5</sup>                             | 9.5×10 <sup>-1</sup>                    | 1.8                   | 1.2×10 <sup>-1</sup>       | 8.1×10 <sup>-1</sup> | N/A                   | <b>1.9×10<sup>-3</sup></b> | 1.4×10 <sup>2</sup>   | 9.8×10 <sup>-1</sup>       |
| T141G   | 5.5×10 <sup>-1</sup>   | 1.1×10 <sup>-2</sup>       | 3.7×10 <sup>5</sup>                             | 2.2×10 <sup>-1</sup>                    | 1.5                   | 1.7×10 <sup>-1</sup>       | 7.5×10 <sup>-1</sup> | N/A                   | <b>3.0×10<sup>-4</sup></b> | 5.0×10 <sup>1</sup>   | 9.7×10 <sup>-2</sup>       |
| T141V   | 1.1                    | 6.4×10 <sup>-1</sup>       | 8.4×10 <sup>4</sup>                             | <b>2.5×10<sup>-2</sup></b>              | 3.1                   | 1.7×10 <sup>-2</sup>       | 9.0×10 <sup>-1</sup> | N/A                   | 8.9×10 <sup>-2</sup>       | 1.2×10 <sup>2</sup>   | 6.1×10 <sup>-1</sup>       |
| V142A   | 1.0                    | 8.7×10 <sup>-1</sup>       | 1.9×10 <sup>5</sup>                             | <b>2.4×10<sup>-2</sup></b>              | 2.2                   | <b>2.5×10<sup>-3</sup></b> | 9.1×10 <sup>-1</sup> | N/A                   | 2.9×10 <sup>-2</sup>       | 1.6×10 <sup>2</sup>   | 6.6×10 <sup>-1</sup>       |
| V142G   | 1.6×10 <sup>-1</sup>   | <b>0</b>                   | 6.5×10 <sup>5</sup>                             | 8.6×10 <sup>-1</sup>                    | 9.6×10 <sup>-1</sup>  | 8.4×10 <sup>-1</sup>       | 7.6×10 <sup>-1</sup> | N/A                   | <b>0</b>                   | 8.0×10 <sup>1</sup>   | 2.1×10 <sup>-1</sup>       |
| T143G   | 6.0×10 <sup>-1</sup>   | 5.1×10 <sup>-2</sup>       | 5.9×10 <sup>5</sup>                             | 9.5×10 <sup>-1</sup>                    | 1.3                   | 2.7×10 <sup>-1</sup>       | N/A                  | 1.0                   | 8.4×10 <sup>-1</sup>       | 1.2×10 <sup>2</sup>   | 6.8×10 <sup>-1</sup>       |
| T143V   | 8.5×10 <sup>-1</sup>   | 5.1×10 <sup>-1</sup>       | 3.3×10 <sup>5</sup>                             | 1.5×10 <sup>-1</sup>                    | 1.1                   | 7.9×10 <sup>-1</sup>       | N/A                  | 1.0                   | 5.5×10 <sup>-1</sup>       | 1.1×10 <sup>2</sup>   | 5.9×10 <sup>-1</sup>       |
| D144G   | 1.7×10 <sup>-1</sup>   | <b>0</b>                   | 2.5×10 <sup>5</sup>                             | 5.4×10 <sup>-2</sup>                    | -                     | -                          | 8.7×10 <sup>-1</sup> | N/A                   | <b>1.8×10<sup>-3</sup></b> | 1.0×10 <sup>2</sup>   | 3.5×10 <sup>-1</sup>       |
| D144V   | ≤ 6.7×10 <sup>-3</sup> | <b>0</b>                   | ≤ 1.9×10 <sup>5</sup>                           | 7.6×10 <sup>-2</sup>                    | -                     | -                          | 6.0×10 <sup>-1</sup> | N/A                   | <b>1.×10<sup>-4</sup></b>  | ≥ 1.1×10 <sup>2</sup> | 6.3×10 <sup>-1</sup>       |
| Q145G   | 1.3                    | 3.9×10 <sup>-1</sup>       | 3.2×10 <sup>5</sup>                             | 2.3×10 <sup>-1</sup>                    | 9.5×10 <sup>-1</sup>  | 8.8×10 <sup>-1</sup>       | 5.5×10 <sup>-1</sup> | N/A                   | 1.4×10 <sup>-2</sup>       | 6.2×10 <sup>1</sup>   | 2.0×10 <sup>-1</sup>       |
| Q145V   | 1.1                    | 6.8×10 <sup>-1</sup>       | 2.9×10 <sup>5</sup>                             | 1.8×10 <sup>-1</sup>                    | 1.0                   | 9.4×10 <sup>-1</sup>       | 8.3×10 <sup>-1</sup> | N/A                   | <b>2.9×10<sup>-3</sup></b> | 1.2×10 <sup>2</sup>   | 8.0×10 <sup>-1</sup>       |
| L146G   | 9.7×10 <sup>-2</sup>   | <b>0</b>                   | 1.6×10 <sup>5</sup>                             | <b>2.8×10<sup>-2</sup></b>              | -                     | -                          | 6.5×10 <sup>-1</sup> | N/A                   | <b>0</b>                   | 7.8×10 <sup>1</sup>   | 1.5×10 <sup>-1</sup>       |
| L146V   | 1.6                    | 3.9×10 <sup>-2</sup>       | 2.4×10 <sup>5</sup>                             | 5.1×10 <sup>-2</sup>                    | 1.1                   | 7.8×10 <sup>-1</sup>       | N/A                  | 1.1                   | 1.2×10 <sup>-1</sup>       | 1.2×10 <sup>2</sup>   | 6.6×10 <sup>-1</sup>       |
| G147A   | 6.9×10 <sup>-1</sup>   | 1.8×10 <sup>-1</sup>       | 5.1×10 <sup>5</sup>                             | 6.6×10 <sup>-1</sup>                    | 1.8                   | 3.1×10 <sup>-2</sup>       | 8.3×10 <sup>-1</sup> | N/A                   | 3.2×10 <sup>-2</sup>       | 1.6×10 <sup>2</sup>   | 7.3×10 <sup>-1</sup>       |
| G147V   | 8.1×10 <sup>-1</sup>   | 4.9×10 <sup>-1</sup>       | 3.8×10 <sup>5</sup>                             | 2.6×10 <sup>-1</sup>                    | 1.0                   | 9.8×10 <sup>-1</sup>       | N/A                  | 1.0                   | 6.5×10 <sup>-1</sup>       | 1.6×10 <sup>2</sup>   | 6.9×10 <sup>-1</sup>       |
| L148G   | 1.4×10 <sup>-1</sup>   | <b>0</b>                   | 7.4×10 <sup>5</sup>                             | 5.6×10 <sup>-1</sup>                    | -                     | -                          | 6.3×10 <sup>-1</sup> | N/A                   | <b>0</b>                   | 1.3×10 <sup>2</sup>   | 8.0×10 <sup>-1</sup>       |
| L148V   | 5.4×10 <sup>-1</sup>   | 1.4×10 <sup>-2</sup>       | 2.9×10 <sup>5</sup>                             | 1.2×10 <sup>-1</sup>                    | 1.7                   | 1.5×10 <sup>-1</sup>       | N/A                  | 1.0                   | 4.4×10 <sup>-1</sup>       | 1.3×10 <sup>2</sup>   | 8.0×10 <sup>-1</sup>       |
| A149G   | 1.2                    | 4.8×10 <sup>-1</sup>       | 2.3×10 <sup>5</sup>                             | 9.6×10 <sup>-2</sup>                    | 2.5                   | 1.1×10 <sup>-2</sup>       | N/A                  | 1.0                   | 6.4×10 <sup>-1</sup>       | 1.1×10 <sup>2</sup>   | 5.2×10 <sup>-1</sup>       |
| A149V   | 3.7×10 <sup>-1</sup>   | <b>1.0×10<sup>-3</sup></b> | 9.1×10 <sup>5</sup>                             | 1.4×10 <sup>-1</sup>                    | 7.7×10 <sup>-1</sup>  | 4.5×10 <sup>-1</sup>       | 7.4×10 <sup>-1</sup> | N/A                   | <b>7.0×10<sup>-4</sup></b> | 1.2×10 <sup>2</sup>   | 7.0×10 <sup>-1</sup>       |
| T150G   | 1.0                    | 9.1×10 <sup>-1</sup>       | 3.1×10 <sup>5</sup>                             | 2.1×10 <sup>-1</sup>                    | 1.2                   | 5.9×10 <sup>-1</sup>       | 8.1×10 <sup>-1</sup> | N/A                   | <b>1.3×10<sup>-3</sup></b> | 6.8×10 <sup>1</sup>   | 2.1×10 <sup>-1</sup>       |
| T150V   | 8.1×10 <sup>-1</sup>   | 3.5×10 <sup>-1</sup>       | 3.1×10 <sup>5</sup>                             | 1.5×10 <sup>-1</sup>                    | 1.3                   | 4.4×10 <sup>-1</sup>       | 9.0×10 <sup>-1</sup> | N/A                   | 5.8×10 <sup>-2</sup>       | 1.3×10 <sup>2</sup>   | 8.2×10 <sup>-1</sup>       |
| N151G   | 1.2×10 <sup>-1</sup>   | <b>0</b>                   | 1.5×10 <sup>5</sup>                             | 8.1×10 <sup>-2</sup>                    | -                     | -                          | 6.0×10 <sup>-1</sup> | N/A                   | <b>1.6×10<sup>-3</sup></b> | 9.5×10 <sup>1</sup>   | 4.5×10 <sup>-1</sup>       |
| N151V   | 9.6×10 <sup>-1</sup>   | 8.3×10 <sup>-1</sup>       | 1.6×10 <sup>5</sup>                             | <b>2.4×10<sup>-2</sup></b>              | 3.0                   | <b>3.8×10<sup>-3</sup></b> | 9.9×10 <sup>-1</sup> | N/A                   | 9.1×10 <sup>-1</sup>       | 1.5×10 <sup>2</sup>   | 7.7×10 <sup>-1</sup>       |
| F152G   | 3.1×10 <sup>-1</sup>   | <b>0</b>                   | 4.9×10 <sup>5</sup>                             | 5.6×10 <sup>-1</sup>                    | 2.2                   | 2.6×10 <sup>-2</sup>       | 8.8×10 <sup>-1</sup> | N/A                   | 2.2×10 <sup>-2</sup>       | 1.4×10 <sup>2</sup>   | 9.7×10 <sup>-1</sup>       |
| F152V   | 6.9×10 <sup>-2</sup>   | <b>0</b>                   | 1.4×10 <sup>6</sup>                             | <b>2.5×10<sup>-2</sup></b>              | -                     | -                          | 8.3×10 <sup>-1</sup> | N/A                   | 1.5×10 <sup>-2</sup>       | 1.3×10 <sup>2</sup>   | 8.0×10 <sup>-1</sup>       |
| T153G   | 9.7×10 <sup>-1</sup>   | 8.3×10 <sup>-1</sup>       | 3.6×10 <sup>5</sup>                             | 2.1×10 <sup>-1</sup>                    | 2.1                   | 1.1×10 <sup>-2</sup>       | 8.6×10 <sup>-1</sup> | N/A                   | 1.5×10 <sup>-2</sup>       | 1.1×10 <sup>2</sup>   | 4.8×10 <sup>-1</sup>       |
| T153V   | 1.4                    | 1.1×10 <sup>-1</sup>       | 2.8×10 <sup>5</sup>                             | 7.5×10 <sup>-2</sup>                    | 1.7                   | 8.7×10 <sup>-2</sup>       | N/A                  | 1.1                   | 1.2×10 <sup>-1</sup>       | 1.6×10 <sup>2</sup>   | 6.9×10 <sup>-1</sup>       |
| S154G   | 1.1                    | 7.5×10 <sup>-1</sup>       | 4.7×10 <sup>5</sup>                             | 4.7×10 <sup>-1</sup>                    | 1.0                   | 9.2×10 <sup>-1</sup>       | 9.4×10 <sup>-1</sup> | N/A                   | 3.8×10 <sup>-1</sup>       | 8.9×10 <sup>1</sup>   | 3.5×10 <sup>-1</sup>       |
| S154V   | 3.3×10 <sup>-1</sup>   | <b>0</b>                   | 2.6×10 <sup>5</sup>                             | 1.1×10 <sup>-1</sup>                    | 1.7                   | 2.0×10 <sup>-1</sup>       | 8.6×10 <sup>-1</sup> | N/A                   | <b>8.5×10<sup>-3</sup></b> | 1.2×10 <sup>2</sup>   | 7.8×10 <sup>-1</sup>       |
| K155G   | 4.4×10 <sup>-1</sup>   | <b>2.0×10<sup>-3</sup></b> | 4.9×10 <sup>5</sup>                             | 5.6×10 <sup>-1</sup>                    | 1.1                   | 7.4×10 <sup>-1</sup>       | 8.7×10 <sup>-1</sup> | N/A                   | 3.0×10 <sup>-2</sup>       | 1.1×10 <sup>2</sup>   | 6.1×10 <sup>-1</sup>       |
| K155V   | 3.7×10 <sup>-1</sup>   | <b>1.0×10<sup>-3</sup></b> | 9.5×10 <sup>5</sup>                             | 9.0×10 <sup>-2</sup>                    | -                     | -                          | 9.6×10 <sup>-1</sup> | N/A                   | 3.7×10 <sup>-1</sup>       | 1.9×10 <sup>2</sup>   | 2.9×10 <sup>-1</sup>       |
| V156A   | 1.1                    | 7.3×10 <sup>-1</sup>       | 2.3×10 <sup>5</sup>                             | 1.1×10 <sup>-1</sup>                    | 1.8                   | 1.5×10 <sup>-1</sup>       | 9.7×10 <sup>-1</sup> | N/A                   | 5.4×10 <sup>-1</sup>       | 1.4×10 <sup>2</sup>   | 9.6×10 <sup>-1</sup>       |
| V156G   | 9.2×10 <sup>-1</sup>   | 7.8×10 <sup>-1</sup>       | 1.7×10 <sup>5</sup>                             | 1.0×10 <sup>-1</sup>                    | -                     | -                          | 8.1×10 <sup>-1</sup> | N/A                   | <b>4.5×10<sup>-3</sup></b> | 1.3×10 <sup>2</sup>   | 8.6×10 <sup>-1</sup>       |
| V157A   | 3.9×10 <sup>-1</sup>   | <b>2.0×10<sup>-3</sup></b> | 8.2×10 <sup>5</sup>                             | 2.7×10 <sup>-1</sup>                    | 1.2                   | 6.6×10 <sup>-1</sup>       | 9.3×10 <sup>-1</sup> | N/A                   | 1.4×10 <sup>-1</sup>       | 1.8×10 <sup>2</sup>   | 4.6×10 <sup>-1</sup>       |
| V157G   | 1.9×10 <sup>-1</sup>   | <b>0</b>                   | 1.9×10 <sup>5</sup>                             | <b>2.8×10<sup>-2</sup></b>              | 2.0                   | 3.1×10 <sup>-2</sup>       | 9.2×10 <sup>-1</sup> | N/A                   | 8.3×10 <sup>-2</sup>       | 9.5×10 <sup>1</sup>   | 2.8×10 <sup>-1</sup>       |
| G158A   | 5.7×10 <sup>-1</sup>   | 3.0×10 <sup>-2</sup>       | 8.0×10 <sup>5</sup>                             | 3.9×10 <sup>-1</sup>                    | 1.4                   | 3.0×10 <sup>-1</sup>       | 8.9×10 <sup>-1</sup> | N/A                   | 8.1×10 <sup>-2</sup>       | 2.3×10 <sup>2</sup>   | 1.3×10 <sup>-1</sup>       |
| G158V   | 1.6×10 <sup>-1</sup>   | <b>0</b>                   | 3.8×10 <sup>5</sup>                             | 2.3×10 <sup>-1</sup>                    | 6.8×10 <sup>-1</sup>  | 2.5×10 <sup>-1</sup>       | 6.4×10 <sup>-1</sup> | N/A                   | <b>0</b>                   | 1.2×10 <sup>2</sup>   | 6.5×10 <sup>-1</sup>       |
| V159A   | 1.2                    | 4.1×10 <sup>-1</sup>       | 7.6×10 <sup>4</sup>                             | <b>7.0×10<sup>-3</sup></b>              | 4.2                   | <b>7.0×10<sup>-4</sup></b> | 9.7×10 <sup>-1</sup> | N/A                   | 5.5×10 <sup>-1</sup>       | 1.3×10 <sup>2</sup>   | 8.9×10 <sup>-1</sup>       |
| V159G   | 6.9×10 <sup>-1</sup>   | 1.7×10 <sup>-1</sup>       | 4.8×10 <sup>5</sup>                             | 5.0×10 <sup>-1</sup>                    | 1.6                   | 1.5×10 <sup>-1</sup>       | 8.2×10 <sup>-1</sup> | N/A                   | 2.4×10 <sup>-2</sup>       | 1.1×10 <sup>2</sup>   | 6.5×10 <sup>-1</sup>       |
| S160G   | 8.0×10 <sup>-1</sup>   | 3.7×10 <sup>-1</sup>       | 1.1×10 <sup>6</sup>                             | <b>3.8×10<sup>-2</sup></b>              | 5.4×10 <sup>-1</sup>  | 5.7×10 <sup>-2</sup>       | 6.2×10 <sup>-1</sup> | N/A                   | <b>0</b>                   | 5.7×10 <sup>1</sup>   | 9.2×10 <sup>-2</sup>       |
| S160V   | -                      | -                          | -                                               | -                                       | -                     | -                          | -                    | -                     | -                          | -                     | -                          |
| L161G   | 1.9×10 <sup>-1</sup>   | <b>0</b>                   | 7.8×10 <sup>4</sup>                             | <b>1.7×10<sup>-2</sup></b>              | 9.9                   | <b>6.9×10<sup>-4</sup></b> | N/A                  | 2.5                   | <b>0</b>                   | 1.5×10 <sup>2</sup>   | 8.8×10 <sup>-1</sup>       |
| L161V   | 1.9                    | <b>9.0×10<sup>-3</sup></b> | 2.6×10 <sup>5</sup>                             | <b>4.5×10<sup>-2</sup></b>              | 1.6                   | 2.8×10 <sup>-2</sup>       | N/A                  | 1.2                   | <b>3.3×10<sup>-3</sup></b> | 1.7×10 <sup>2</sup>   | 4.6×10 <sup>-1</sup>       |
| K162G   | ≤ 1.0                  | 1.0                        | ≤ 2.8×10 <sup>2</sup>                           | <b>0</b>                                | ≤ 2.7×10 <sup>3</sup> | <b>0</b>                   | -                    | -                     | -                          | -                     | -                          |
| K162V   | ≤ 1.0                  | 1.0                        | ≤ 6.7×10 <sup>2</sup>                           | <b>0</b>                                | ≤ 1.7×10 <sup>4</sup> | <b>0</b>                   | N/A                  | 3.8                   | <b>1.×10<sup>-4</sup></b>  | ≥ 6.6×10 <sup>1</sup> | 1.8×10 <sup>-1</sup>       |
| D163G   | 2.2×10 <sup>-1</sup>   | <b>0</b>                   | 4.2×10 <sup>5</sup>                             | 4.2×10 <sup>-1</sup>                    | 4.2                   | <b>7.9×10<sup>-4</sup></b> | N/A                  | 3.8                   | <b>1.×10<sup>-4</sup></b>  | 4.9×10 <sup>1</sup>   | 1.5×10 <sup>-1</sup>       |
| D163V   | 1.0×10 <sup>-1</sup>   | <b>0</b>                   | 7.1×10 <sup>4</sup>                             | <b>3.7×10<sup>-2</sup></b>              | 2.6×10 <sup>1</sup>   | <b>2.0×10<sup>-4</sup></b> | N/A                  | ≥ 8.4                 | <b>0</b>                   | 3.5×10 <sup>1</sup>   | 8.0×10 <sup>-2</sup>       |
| R164G   | 3.5×10 <sup>-1</sup>   | <b>0</b>                   | 6.0×10 <sup>3</sup>                             | <b>2.1×10<sup>-2</sup></b>              | 2.0×10 <sup>3</sup>   | <b>0</b>                   | N/A                  | ≥ 3.3                 | <b>0</b>                   | 1.3×10 <sup>1</sup>   | <b>2.4×10<sup>-2</sup></b> |
| R164V   | 1.9×10 <sup>-1</sup>   | <b>0</b>                   | 1.5×10 <sup>4</sup>                             | <b>1.5×10<sup>-2</sup></b>              | 1.4×10 <sup>3</sup>   | <b>0</b>                   | N/A                  | ≥ 2.2×10 <sup>2</sup> | <b>1.×10<sup>-4</sup></b>  | 5.3×10 <sup>1</sup>   | 6.7×10 <sup>-2</sup>       |
| A165G   | 1.7                    | 8.3×10 <sup>-2</sup>       | 1.2×10 <sup>5</sup>                             | 6.2×10 <sup>-2</sup>                    | 1.2                   | 6.2×10 <sup>-1</sup>       | N/A                  | 1.4                   | <b>3.0×10<sup>-4</sup></b> | 1.7×10 <sup>2</sup>   | 6.1×10 <sup>-1</sup>       |
| A165V   | ≤ 4.4×10 <sup>-2</sup> | <b>0</b>                   | ≤ 2.6×10 <sup>4</sup>                           | <b>1.6×10<sup>-2</sup></b>              | -                     | -                          | N/A                  | 4.3                   | <b>1.×10<sup>-4</sup></b>  | ≥ 4.6×10 <sup>2</sup> | <b>0</b>                   |
| S166G   | 1.6                    | 1.3×10 <sup>-1</sup>       | 2.0×10 <sup>5</sup>                             | 1.0×10 <sup>-1</sup>                    | 2.8                   | <b>1.6×10<sup>-3</sup></b> | N/A                  | 1.1                   | 2.4×10 <sup>-1</sup>       | 1.1×10 <sup>2</sup>   | 6.6×10 <sup>-1</sup>       |
| S166V   | 1.8                    | 2.8×10 <sup>-2</sup>       | 2.1×10 <sup>5</sup>                             | 5.9×10 <sup>-2</sup>                    | 1.8                   | 8.9×10 <sup>-2</sup>       | 6.8×10 <sup>-1</sup> | N/A                   | <b>6.0×10<sup>-4</sup></b> | 1.2×10 <sup>2</sup>   | 7.9×10 <sup>-1</sup>       |
| I167G   | -                      | -                          | -                                               | -                                       | -                     | -                          | -                    | -                     | -                          | -                     | -                          |
| I167V   | 1.0                    | 9.7×10 <sup>-1</sup>       | 5.2×10 <sup>5</sup>                             | 5.9×10 <sup>-1</sup>                    | 8.8×10 <sup>-1</sup>  | 6.5×10 <sup>-1</sup>       | N/A                  | 1.2                   | <b>2.7×10<sup>-3</sup></b> | 1.5×10 <sup>2</sup>   | 8.7×10 <sup>-1</sup>       |
| L168G   | 7.1×10 <sup>-2</sup>   | <b>0</b>                   | 8.6×10 <sup>5</sup>                             | 1.8×10 <sup>-1</sup>                    | -                     | -                          | 4.2×10 <sup>-1</sup> | N/A                   | <b>0</b>                   | 1.8×10 <sup>2</sup>   | 4.9×10 <sup>-1</sup>       |
| L168V   | 4.6×10 <sup>-1</sup>   | <b>5.0×10<sup>-3</sup></b> | 4.5×10 <sup>5</sup>                             | 4.1×10 <sup>-1</sup>                    | 8.4×10 <sup>-1</sup>  | 5.5×10 <sup>-1</sup>       | 1.0                  | N/A                   | 9.5×10 <sup>-1</sup>       | 1.2×10 <sup>2</sup>   | 7.1×10 <sup>-1</sup>       |
| P169G   | ≥ 2.9×10 <sup>-1</sup> | <b>0</b>                   | ≥ 6.9×10 <sup>5</sup>                           | 6.5×10 <sup>-1</sup>                    | 1.1                   | 5.3×10 <sup>-1</sup>       | 1.6×10 <sup>-1</sup> | N/A                   | <b>0</b>                   | ≤ 1.6×10 <sup>2</sup> | 7.2×10 <sup>-1</sup>       |
| P169V   | 1.9×10 <sup>-1</sup>   | <b>0</b>                   | 1.5×10 <sup>6</sup>                             | <b>6.0×10<sup>-3</sup></b>              | -                     | -                          | 3.2×10 <sup>-1</sup> | N/A                   | <b>3.0×10<sup>-4</sup></b> | 1.1×10 <sup>2</sup>   | 6.1×10 <sup>-1</sup>       |
| A170G   | 1.0                    | 8.4×10 <sup>-1</sup>       | 1.5×10 <sup>5</sup>                             | 8.6×10 <sup>-2</sup>                    | 3.6                   | <b>1.8×10<sup>-3</sup></b> | 9.5×10 <sup>-1</sup> | N/A                   | 2.9×10 <sup>-1</sup>       | 1.1×10 <sup>2</sup>   | 5.9×10 <sup>-1</sup>       |
| A170V   | 8.1×10 <sup>-1</sup>   | 3.3×10 <sup>-1</sup>       | 3.3×10 <sup>5</sup> </                          |                                         |                       |                            |                      |                       |                            |                       |                            |



| Variant | $f_a$                     | $f_a$ p-value        | $(k_{cat}/K_M)_{chem}^{MEP}$ ( $M^{-1}s^{-1}$ ) | $(k_{cat}/K_M)_{chem}^{MEP}$ p-value | FC1                  | FC1 p-value          | FC2                  | FC3 | FC2/3 p-value        | FC4 ( $s^{-1}$ )       | FC4 p-value          |
|---------|---------------------------|----------------------|-------------------------------------------------|--------------------------------------|----------------------|----------------------|----------------------|-----|----------------------|------------------------|----------------------|
| N173G   | $5.1 \times 10^{-1}$      | $1.5 \times 10^{-2}$ | $4.5 \times 10^5$                               | $4.4 \times 10^{-1}$                 | 2.2                  | $8.6 \times 10^{-3}$ | $7.6 \times 10^{-1}$ | N/A | $1. \times 10^{-4}$  | $9.7 \times 10^1$      | $3.4 \times 10^{-1}$ |
| N173V   | $2.7 \times 10^{-1}$      | 0                    | $3.7 \times 10^5$                               | $2.0 \times 10^{-1}$                 | -                    | -                    | $8.8 \times 10^{-1}$ | N/A | $3.1 \times 10^{-2}$ | $1.2 \times 10^2$      | $7.4 \times 10^{-1}$ |
| P174G   | $1.6 \times 10^{-1}$      | 0                    | $4.6 \times 10^5$                               | $3.9 \times 10^{-1}$                 | 2.0                  | $1.1 \times 10^{-2}$ | $7.1 \times 10^{-1}$ | N/A | 0                    | $7.8 \times 10^1$      | $1.7 \times 10^{-1}$ |
| P174V   | $1.4 \times 10^{-1}$      | 0                    | $2.7 \times 10^5$                               | $8.5 \times 10^{-2}$                 | 1.8                  | $9.8 \times 10^{-2}$ | $7.3 \times 10^{-1}$ | N/A | 0                    | $8.9 \times 10^1$      | $2.5 \times 10^{-1}$ |
| T175G   | $4.8 \times 10^{-1}$      | $1.0 \times 10^{-2}$ | $4.4 \times 10^5$                               | $4.1 \times 10^{-1}$                 | 2.5                  | $4.3 \times 10^{-3}$ | $8.9 \times 10^{-1}$ | N/A | $2.6 \times 10^{-2}$ | $1.2 \times 10^2$      | $7.0 \times 10^{-1}$ |
| T175V   | 1.3                       | $3.2 \times 10^{-1}$ | $4.9 \times 10^5$                               | $5.0 \times 10^{-1}$                 | $8.4 \times 10^{-1}$ | $4.3 \times 10^{-1}$ | N/A                  | 1.1 | $4.5 \times 10^{-2}$ | $1.7 \times 10^2$      | $5.4 \times 10^{-1}$ |
| G176A   | $\leq 1.1$                | $7.4 \times 10^{-1}$ | $\leq 2.8 \times 10^5$                          | $1.4 \times 10^{-1}$                 | $\leq 2.2$           | $1.5 \times 10^{-2}$ | $8.4 \times 10^{-1}$ | N/A | $1.5 \times 10^{-2}$ | $\geq 8.6 \times 10^1$ | $2.7 \times 10^{-1}$ |
| G176V   | $3.2 \times 10^{-1}$      | 0                    | $7.4 \times 10^5$                               | $5.3 \times 10^{-1}$                 | -                    | -                    | $8.1 \times 10^{-1}$ | N/A | $6.7 \times 10^{-3}$ | $1.3 \times 10^2$      | $8.6 \times 10^{-1}$ |
| A177G   | $2.8 \times 10^{-1}$      | $1.0 \times 10^{-3}$ | $3.6 \times 10^5$                               | $2.8 \times 10^{-1}$                 | 2.1                  | $2.3 \times 10^{-2}$ | $9.8 \times 10^{-1}$ | N/A | $5.7 \times 10^{-1}$ | $1.1 \times 10^2$      | $5.7 \times 10^{-1}$ |
| A177V   | $8.9 \times 10^{-1}$      | $5.4 \times 10^{-1}$ | $3.9 \times 10^5$                               | $1.4 \times 10^{-1}$                 | $8.3 \times 10^{-1}$ | $5.8 \times 10^{-1}$ | N/A                  | 1.1 | $2.0 \times 10^{-1}$ | $1.4 \times 10^2$      | $9.4 \times 10^{-1}$ |
| F178G   | $\leq 1.3 \times 10^{-2}$ | 0                    | $\leq 4.4 \times 10^5$                          | $3.4 \times 10^{-1}$                 | -                    | -                    | $9.3 \times 10^{-1}$ | N/A | $1.2 \times 10^{-1}$ | $\geq 1.6 \times 10^2$ | $7.5 \times 10^{-1}$ |
| F178V   | $8.3 \times 10^{-1}$      | $3.5 \times 10^{-1}$ | $4.4 \times 10^5$                               | $3.3 \times 10^{-1}$                 | 1.3                  | $4.2 \times 10^{-1}$ | $9.3 \times 10^{-1}$ | N/A | $1.4 \times 10^{-1}$ | $1.4 \times 10^2$      | $9.8 \times 10^{-1}$ |
| W179G   | -                         | -                    | -                                               | -                                    | -                    | -                    | -                    | -   | -                    | -                      | -                    |
| W179V   | $\leq 3.2 \times 10^{-2}$ | $5.0 \times 10^{-3}$ | $\leq 4.2 \times 10^5$                          | $5.5 \times 10^{-1}$                 | -                    | -                    | $9.3 \times 10^{-1}$ | N/A | $5.1 \times 10^{-1}$ | $\geq 9.4 \times 10^1$ | $6.9 \times 10^{-1}$ |
| F180G   | $7.7 \times 10^{-1}$      | $2.9 \times 10^{-1}$ | $4.8 \times 10^4$                               | $1.2 \times 10^{-2}$                 | 6.5                  | $1. \times 10^{-4}$  | $8.9 \times 10^{-1}$ | N/A | $6.7 \times 10^{-2}$ | $5.4 \times 10^1$      | $1.0 \times 10^{-1}$ |
| F180V   | 1.4                       | $4.2 \times 10^{-1}$ | $7.3 \times 10^4$                               | $1.1 \times 10^{-1}$                 | 5.3                  | $7.4 \times 10^{-4}$ | $6.8 \times 10^{-1}$ | N/A | $4.0 \times 10^{-4}$ | $1.2 \times 10^2$      | $7.5 \times 10^{-1}$ |
| D181G   | $2.4 \times 10^{-1}$      | 0                    | $1.6 \times 10^5$                               | $3.1 \times 10^{-2}$                 | 1.9                  | $7.3 \times 10^{-2}$ | N/A                  | 1.2 | $5.0 \times 10^{-4}$ | $1.4 \times 10^2$      | 1.0                  |
| D181V   | $6.3 \times 10^{-1}$      | $7.4 \times 10^{-2}$ | $4.0 \times 10^4$                               | $1.0 \times 10^{-2}$                 | $1.6 \times 10^1$    | $9.0 \times 10^{-5}$ | -                    | -   | -                    | -                      | -                    |
| D182G   | 1.1                       | $7.9 \times 10^{-1}$ | $5.5 \times 10^4$                               | $4.2 \times 10^{-2}$                 | 5.2                  | $2.3 \times 10^{-4}$ | N/A                  | 1.7 | 0                    | $6.0 \times 10^1$      | $1.9 \times 10^{-1}$ |
| D182V   | 3.0                       | 0                    | $4.6 \times 10^4$                               | $2.4 \times 10^{-2}$                 | 5.8                  | $1. \times 10^{-4}$  | $9.2 \times 10^{-1}$ | N/A | $1.3 \times 10^{-1}$ | $9.9 \times 10^1$      | $3.9 \times 10^{-1}$ |
| T183G   | $9.5 \times 10^{-1}$      | $7.5 \times 10^{-1}$ | $5.0 \times 10^5$                               | $6.3 \times 10^{-1}$                 | 1.3                  | $5.0 \times 10^{-1}$ | $7.0 \times 10^{-1}$ | N/A | $1.3 \times 10^{-3}$ | $1.1 \times 10^2$      | $5.7 \times 10^{-1}$ |
| T183V   | 1.5                       | $1.1 \times 10^{-1}$ | $3.7 \times 10^5$                               | $1.1 \times 10^{-1}$                 | 1.3                  | $4.4 \times 10^{-1}$ | $9.1 \times 10^{-1}$ | N/A | $1.6 \times 10^{-1}$ | $1.7 \times 10^2$      | $5.0 \times 10^{-1}$ |
| T184G   | $9.9 \times 10^{-1}$      | $9.0 \times 10^{-1}$ | $3.0 \times 10^5$                               | $1.2 \times 10^{-1}$                 | 1.3                  | $3.0 \times 10^{-1}$ | $7.3 \times 10^{-1}$ | N/A | 0                    | $8.1 \times 10^1$      | $2.3 \times 10^{-1}$ |
| T184V   | $7.1 \times 10^{-1}$      | $1.7 \times 10^{-1}$ | $5.1 \times 10^5$                               | $6.3 \times 10^{-1}$                 | 1.1                  | $6.7 \times 10^{-1}$ | $9.4 \times 10^{-1}$ | N/A | $1.7 \times 10^{-1}$ | $1.3 \times 10^2$      | $7.6 \times 10^{-1}$ |
| G185A   | 1.5                       | $1.5 \times 10^{-1}$ | $4.1 \times 10^5$                               | $3.1 \times 10^{-1}$                 | 1.4                  | $2.2 \times 10^{-1}$ | $8.5 \times 10^{-1}$ | N/A | $1.8 \times 10^{-2}$ | $1.3 \times 10^2$      | $9.1 \times 10^{-1}$ |
| G185V   | $5.5 \times 10^{-1}$      | $3.1 \times 10^{-2}$ | $5.0 \times 10^4$                               | $2.3 \times 10^{-2}$                 | $1.4 \times 10^1$    | $1.8 \times 10^{-4}$ | $5.7 \times 10^{-1}$ | N/A | $5.0 \times 10^{-4}$ | $1.2 \times 10^2$      | $7.0 \times 10^{-1}$ |
| K186G   | 1.2                       | $4.3 \times 10^{-1}$ | $2.4 \times 10^5$                               | $7.2 \times 10^{-2}$                 | 2.2                  | $9.3 \times 10^{-3}$ | $9.5 \times 10^{-1}$ | N/A | $3.0 \times 10^{-1}$ | $9.8 \times 10^1$      | $3.2 \times 10^{-1}$ |
| K186V   | 1.4                       | $1.6 \times 10^{-1}$ | $1.2 \times 10^5$                               | $1.7 \times 10^{-2}$                 | 2.7                  | $4.4 \times 10^{-3}$ | N/A                  | 1.0 | $4.3 \times 10^{-1}$ | $1.5 \times 10^2$      | $8.2 \times 10^{-1}$ |
| F187G   | $1.2 \times 10^{-1}$      | 0                    | $1.3 \times 10^5$                               | $6.7 \times 10^{-2}$                 | -                    | -                    | N/A                  | 1.0 | $8.6 \times 10^{-1}$ | $9.5 \times 10^1$      | $3.3 \times 10^{-1}$ |
| F187V   | $3.5 \times 10^{-1}$      | 0                    | $2.9 \times 10^5$                               | $1.4 \times 10^{-1}$                 | -                    | -                    | $9.8 \times 10^{-1}$ | N/A | $4.5 \times 10^{-1}$ | $1.1 \times 10^2$      | $5.9 \times 10^{-1}$ |
| I188V   | 1.3                       | $2.1 \times 10^{-1}$ | $2.9 \times 10^5$                               | $8.3 \times 10^{-2}$                 | 1.9                  | $4.2 \times 10^{-2}$ | N/A                  | 1.0 | $8.1 \times 10^{-1}$ | $2.0 \times 10^2$      | $2.2 \times 10^{-1}$ |
| T189G   | $2.0 \times 10^{-1}$      | 0                    | $3.5 \times 10^5$                               | $1.8 \times 10^{-1}$                 | 1.1                  | $7.3 \times 10^{-1}$ | $8.7 \times 10^{-1}$ | N/A | $4.2 \times 10^{-2}$ | $1.1 \times 10^2$      | $5.3 \times 10^{-1}$ |
| S190G   | $2.8 \times 10^{-1}$      | 0                    | $2.8 \times 10^5$                               | $1.4 \times 10^{-1}$                 | 1.6                  | $1.1 \times 10^{-1}$ | N/A                  | 1.7 | 0                    | $4.0 \times 10^1$      | $7.3 \times 10^{-2}$ |
| S190V   | -                         | -                    | -                                               | -                                    | -                    | -                    | $3.1 \times 10^{-1}$ | N/A | $9.0 \times 10^{-4}$ | -                      | -                    |
| T191G   | 1.5                       | $1.8 \times 10^{-1}$ | $3.6 \times 10^5$                               | $2.7 \times 10^{-1}$                 | 1.6                  | $1.5 \times 10^{-1}$ | $9.1 \times 10^{-1}$ | N/A | $8.9 \times 10^{-2}$ | $1.2 \times 10^2$      | $7.1 \times 10^{-1}$ |
| T191V   | $2.1 \times 10^{-1}$      | 0                    | $3.5 \times 10^5$                               | $2.6 \times 10^{-1}$                 | -                    | -                    | $9.9 \times 10^{-1}$ | N/A | $8.2 \times 10^{-1}$ | $1.0 \times 10^2$      | $4.6 \times 10^{-1}$ |
| Y192V   | $\leq 7.8 \times 10^{-2}$ | 0                    | $\leq 4.5 \times 10^5$                          | $5.3 \times 10^{-1}$                 | -                    | -                    | -                    | -   | -                    | -                      | -                    |
| Y193G   | -                         | -                    | -                                               | -                                    | -                    | -                    | -                    | -   | -                    | -                      | -                    |
| Y193V   | $2.8 \times 10^{-1}$      | 0                    | $1.4 \times 10^5$                               | $4.4 \times 10^{-2}$                 | -                    | -                    | $8.4 \times 10^{-1}$ | N/A | $4.2 \times 10^{-2}$ | $1.1 \times 10^2$      | $5.2 \times 10^{-1}$ |
| T194G   | 1.5                       | $1.8 \times 10^{-1}$ | $4.6 \times 10^5$                               | $4.9 \times 10^{-1}$                 | 1.0                  | $9.9 \times 10^{-1}$ | $9.8 \times 10^{-1}$ | N/A | $6.4 \times 10^{-1}$ | $9.3 \times 10^1$      | $3.5 \times 10^{-1}$ |
| T194V   | $7.9 \times 10^{-1}$      | $2.8 \times 10^{-1}$ | $9.2 \times 10^5$                               | $6.8 \times 10^{-2}$                 | $6.8 \times 10^{-1}$ | $1.7 \times 10^{-1}$ | N/A                  | 1.0 | $3.0 \times 10^{-1}$ | $2.0 \times 10^2$      | $1.5 \times 10^{-1}$ |
| K195G   | 1.5                       | $1.2 \times 10^{-1}$ | $3.7 \times 10^5$                               | $2.2 \times 10^{-1}$                 | 1.2                  | $4.5 \times 10^{-1}$ | $9.8 \times 10^{-1}$ | N/A | $7.2 \times 10^{-1}$ | $1.3 \times 10^2$      | $8.4 \times 10^{-1}$ |
| K195V   | 1.4                       | $9.4 \times 10^{-2}$ | $2.6 \times 10^5$                               | $4.3 \times 10^{-2}$                 | 1.6                  | $1.3 \times 10^{-1}$ | N/A                  | 1.1 | $1.4 \times 10^{-1}$ | $1.5 \times 10^2$      | $8.6 \times 10^{-1}$ |
| E196G   | 1.4                       | $2.1 \times 10^{-1}$ | $3.2 \times 10^5$                               | $1.8 \times 10^{-1}$                 | 1.1                  | $7.6 \times 10^{-1}$ | $8.9 \times 10^{-1}$ | N/A | $4.3 \times 10^{-2}$ | $1.1 \times 10^2$      | $5.1 \times 10^{-1}$ |
| E196V   | 1.5                       | $1.1 \times 10^{-1}$ | $2.8 \times 10^5$                               | $7.5 \times 10^{-2}$                 | 1.3                  | $3.0 \times 10^{-1}$ | N/A                  | 1.1 | $1.0 \times 10^{-1}$ | $1.6 \times 10^2$      | $6.1 \times 10^{-1}$ |
| L197G   | $2.2 \times 10^{-1}$      | 0                    | $6.4 \times 10^5$                               | $9.0 \times 10^{-1}$                 | 1.6                  | $1.7 \times 10^{-1}$ | $8.0 \times 10^{-1}$ | N/A | $1.3 \times 10^{-3}$ | $1.7 \times 10^2$      | $5.9 \times 10^{-1}$ |
| L197V   | $9.2 \times 10^{-1}$      | $6.6 \times 10^{-1}$ | $5.2 \times 10^5$                               | $5.2 \times 10^{-1}$                 | $8.4 \times 10^{-1}$ | $6.0 \times 10^{-1}$ | $9.8 \times 10^{-1}$ | N/A | $7.3 \times 10^{-1}$ | $1.5 \times 10^2$      | $8.1 \times 10^{-1}$ |
| P198G   | $5.3 \times 10^{-1}$      | $2.4 \times 10^{-2}$ | $2.0 \times 10^5$                               | $8.9 \times 10^{-2}$                 | 3.2                  | $2.5 \times 10^{-3}$ | $8.9 \times 10^{-1}$ | N/A | $3.4 \times 10^{-2}$ | $1.4 \times 10^2$      | $9.3 \times 10^{-1}$ |
| P198V   | 1.3                       | $2.9 \times 10^{-1}$ | $8.7 \times 10^4$                               | $4.3 \times 10^{-2}$                 | 3.1                  | $2.4 \times 10^{-3}$ | $9.8 \times 10^{-1}$ | N/A | $6.9 \times 10^{-1}$ | $1.5 \times 10^2$      | $8.1 \times 10^{-1}$ |
| K199G   | 1.4                       | $2.4 \times 10^{-1}$ | $4.8 \times 10^5$                               | $5.6 \times 10^{-1}$                 | $9.4 \times 10^{-1}$ | $8.1 \times 10^{-1}$ | $9.5 \times 10^{-1}$ | N/A | $3.2 \times 10^{-1}$ | $1.3 \times 10^2$      | $8.4 \times 10^{-1}$ |
| K199V   | 1.2                       | $5.0 \times 10^{-1}$ | $4.6 \times 10^5$                               | $4.1 \times 10^{-1}$                 | 1.2                  | $5.9 \times 10^{-1}$ | N/A                  | 1.1 | $2.2 \times 10^{-1}$ | $1.5 \times 10^2$      | $8.5 \times 10^{-1}$ |
| W200G   | $\leq 4.4 \times 10^{-2}$ | 0                    | $\leq 1.2 \times 10^5$                          | $4.1 \times 10^{-2}$                 | -                    | -                    | $8.9 \times 10^{-1}$ | N/A | $1.4 \times 10^{-2}$ | $\geq 9.7 \times 10^1$ | $3.8 \times 10^{-1}$ |
| W200V   | $1.5 \times 10^{-1}$      | 0                    | $1.6 \times 10^5$                               | $5.9 \times 10^{-2}$                 | -                    | -                    | $7.2 \times 10^{-1}$ | N/A | $9.0 \times 10^{-4}$ | $1.4 \times 10^2$      | 1.0                  |
| V201A   | 1.3                       | $3.6 \times 10^{-1}$ | $2.6 \times 10^5$                               | $1.5 \times 10^{-1}$                 | 1.6                  | $1.6 \times 10^{-1}$ | N/A                  | 1.1 | $1.7 \times 10^{-1}$ | $1.9 \times 10^2$      | $3.9 \times 10^{-1}$ |
| V201G   | $2.6 \times 10^{-1}$      | 0                    | $2.7 \times 10^5$                               | $6.1 \times 10^{-2}$                 | 1.6                  | $1.5 \times 10^{-1}$ | $8.4 \times 10^{-1}$ | N/A | $4.1 \times 10^{-3}$ | $1.3 \times 10^2$      | $8.4 \times 10^{-1}$ |
| N202G   | 1.2                       | $3.5 \times 10^{-1}$ | $2.5 \times 10^5$                               | $6.6 \times 10^{-2}$                 | 2.3                  | $6.1 \times 10^{-3}$ | $9.4 \times 10^{-1}$ | N/A | $1.5 \times 10^{-1}$ | $1.1 \times 10^2$      | $5.7 \times 10^{-1}$ |
| N202V   | 1.2                       | $3.9 \times 10^{-1}$ | $4.2 \times 10^5$                               | $2.5 \times 10^{-1}$                 | $8.3 \times 10^{-1}$ | $6.6 \times 10^{-1}$ | N/A                  | 1.1 | $1.3 \times 10^{-1}$ | $1.4 \times 10^2$      | $9.2 \times 10^{-1}$ |
| D203G   | $\leq 1.2$                | $4.1 \times 10^{-1}$ | $\leq 1.4 \times 10^5$                          | $4.2 \times 10^{-2}$                 | $\leq 3.2$           | $7.6 \times 10^{-3}$ | N/A                  | 1.1 | $3.6 \times 10^{-2}$ | $\geq 8.5 \times 10^1$ | $2.1 \times 10^{-1}$ |
| D203V   | $9.3 \times 10^{-1}$      | $6.9 \times 10^{-1}$ | $4.5 \times 10^5$                               | $3.6 \times 10^{-1}$                 | 1.3                  | $4.7 \times 10^{-1}$ | N/A                  | 1.1 | $6.7 \times 10^{-2}$ | $1.8 \times 10^2$      | $3.8 \times 10^{-1}$ |
| F204G   | $2.1 \times 10^{-2}$      | 0                    | $2.1 \times 10^5$                               | $1.4 \times 10^{-1}$                 | -                    | -                    | $9.4 \times 10^{-1}$ | N/A | $3.0 \times 10^{-1}$ | $1.2 \times 10^2$      | $6.9 \times 10^{-1}$ |
| F204V   | $\leq 6.9 \times 10^{-1}$ | $9.9 \times 10^{-2}$ | $\leq 1.2 \times 10^5$                          | $2.3 \times 10^{-2}$                 | $\leq 4.5$           | $9.7 \times 10^{-4}$ | $9.7 \times 10^{-1}$ | N/A | $5.0 \times 10^{-1}$ | $\geq 1.4 \times 10^2$ | $9.9 \times 10^{-1}$ |
| N205V   | $3.8 \times 10^{-1}$      | 0                    | $8.1 \times 10^4$                               | $2.3 \times 10^{-2}$                 | 4.9                  | $1.2 \times 10^{-3}$ | $7.7 \times 10^{-1}$ | N/A | $2.0 \times 10^{-3}$ | $1.3 \times 10^2$      | $8.5 \times 10^{-1}$ |
| N206G   | $7.8 \times 10^{-1}$      | $2.6 \times 10^{-1}$ | $1.9 \times 10^6$                               | $1.0 \times 10^{-3}$                 | $4.7 \times 10^{-1}$ | $3.0 \times 10^{-2}$ | $8.9 \times 10^{-1}$ | N/A | $3.1 \times 10^{-2}$ | $1.1 \times 10^2$      | $5.7 \times 10^{-1}$ |
| N206V   | 1.0                       | $9.8 \times 10^{-1}$ | $4.3 \times 10^5$                               | $1.4 \times 10^{-1}$                 | 1.0                  | $8.6 \times 10^{-1}$ | N/A                  | 1.0 | $2.3 \times 10^{-1}$ | $1.5 \times 10^2$      | $7.7 \times 10^{-1}$ |
| K207G   | 1.4                       | $1.2 \times 10^{-1}$ | $3.3 \times 10^5$                               | $2.0 \times 10^{-1}$                 | 1.2                  | $4.9 \times 10^{-1}$ | $9.6 \times 10^{-1}$ | N/A | $3.7 \times 10^{-1}$ | $1.1 \times 10^2$      | $5.8 \times 10^{-1}$ |
| K207V   | $9.5 \times 10^{-1}$      | $8.3 \times 10^{-1}$ | $4.3 \times 10^5$                               | $3.2 \times 10^{-1}$                 | -                    | -                    | N/A                  | 1.0 | $4.3 \times 10^{-1}$ | $1.4 \times 10^2$      | $9.4 \times 10^{-1}$ |
| N208G   | 1.3                       | $3.5 \times 10^{-1}$ | $2.9 \times 10^5$                               | $1.8 \times 10^{-1}$                 | 1.8                  | $2.7 \times 10^{-2}$ | $9.0 \times 10^{-1}$ | N/A | $3.3 \times 10^{-1}$ | $1.2 \times 10^2$      | $7.8 \times 10^{-1}$ |
| N208V   | 1.7                       | $2.5 \times 10^{-2}$ | $1.5 \times 10^5$                               | $3.9 \times 10^{-2}$                 | 2.4                  | $6.5 \times 10^{-3}$ | N/A                  | 1.0 | $6.0 \times 10^{-1}$ | $1.5 \times 10^2$      | $8.3 \times 10^{-1$  |



| Variant | $f_a$                     | $f_a$ $p$ -value                       | $(k_{cat}/K_M)_{chem}^{MEP}$ ( $M^{-1}s^{-1}$ ) | $(k_{cat}/K_M)_{chem}^{MEP}$ $p$ -value | FC1                  | FC1 $p$ -value                         | FC2                  | FC3 | FC2/3 $p$ -value                       | FC4 ( $s^{-1}$ )       | FC4 $p$ -value                         |
|---------|---------------------------|----------------------------------------|-------------------------------------------------|-----------------------------------------|----------------------|----------------------------------------|----------------------|-----|----------------------------------------|------------------------|----------------------------------------|
| Q212V   | 1.3                       | $1.7 \times 10^{-1}$                   | $3.2 \times 10^5$                               | $1.1 \times 10^{-1}$                    | 1.1                  | $8.6 \times 10^{-1}$                   | N/A                  | 1.0 | $4.4 \times 10^{-1}$                   | $1.4 \times 10^2$      | $9.0 \times 10^{-1}$                   |
| L213G   | 1.9                       | $3.6 \times 10^{-2}$                   | $1.8 \times 10^5$                               | $8.2 \times 10^{-2}$                    | 1.7                  | $5.4 \times 10^{-2}$                   | $9.1 \times 10^{-1}$ | N/A | $8.7 \times 10^{-2}$                   | $9.5 \times 10^1$      | $4.2 \times 10^{-1}$                   |
| L213V   | 1.1                       | $7.2 \times 10^{-1}$                   | $3.4 \times 10^5$                               | $1.1 \times 10^{-1}$                    | 1.5                  | $1.9 \times 10^{-1}$                   | $9.1 \times 10^{-1}$ | N/A | $8.0 \times 10^{-2}$                   | $1.4 \times 10^2$      | $9.1 \times 10^{-1}$                   |
| V214A   | 1.1                       | $5.4 \times 10^{-1}$                   | $4.5 \times 10^5$                               | $1.9 \times 10^{-1}$                    | 1.1                  | $7.9 \times 10^{-1}$                   | $9.3 \times 10^{-1}$ | N/A | $7.1 \times 10^{-2}$                   | $1.5 \times 10^2$      | $7.6 \times 10^{-1}$                   |
| V214G   | 1.1                       | $6.2 \times 10^{-1}$                   | $1.9 \times 10^5$                               | $6.1 \times 10^{-2}$                    | 2.7                  | <b><math>2.0 \times 10^{-3}</math></b> | $6.8 \times 10^{-1}$ | N/A | <b>0</b>                               | $7.1 \times 10^1$      | $1.6 \times 10^{-1}$                   |
| A215G   | 1.6                       | $2.1 \times 10^{-1}$                   | $3.3 \times 10^5$                               | $3.4 \times 10^{-1}$                    | 1.3                  | $3.4 \times 10^{-1}$                   | $9.0 \times 10^{-1}$ | N/A | $1.1 \times 10^{-1}$                   | $9.9 \times 10^1$      | $4.8 \times 10^{-1}$                   |
| A215V   | 1.7                       | $4.2 \times 10^{-2}$                   | $3.0 \times 10^5$                               | $1.2 \times 10^{-1}$                    | 1.1                  | $7.7 \times 10^{-1}$                   | $9.9 \times 10^{-1}$ | N/A | $7.3 \times 10^{-1}$                   | $1.2 \times 10^2$      | $6.6 \times 10^{-1}$                   |
| N216G   | 1.5                       | $9.6 \times 10^{-2}$                   | $3.9 \times 10^5$                               | $2.5 \times 10^{-1}$                    | 1.2                  | $5.3 \times 10^{-1}$                   | $8.7 \times 10^{-1}$ | N/A | $2.3 \times 10^{-2}$                   | $1.5 \times 10^2$      | $9.2 \times 10^{-1}$                   |
| N216V   | $7.0 \times 10^{-1}$      | $4.3 \times 10^{-1}$                   | $1.8 \times 10^5$                               | $1.5 \times 10^{-1}$                    | -                    | -                                      | -                    | -   | -                                      | -                      | -                                      |
| G217A   | $1.6 \times 10^{-1}$      | <b>0</b>                               | $1.3 \times 10^5$                               | <b><math>4.7 \times 10^{-2}</math></b>  | 2.6                  | $4.7 \times 10^{-2}$                   | $9.5 \times 10^{-1}$ | N/A | $4.9 \times 10^{-1}$                   | $1.2 \times 10^2$      | $6.7 \times 10^{-1}$                   |
| G217V   | 1.3                       | $2.2 \times 10^{-1}$                   | $2.3 \times 10^5$                               | $5.8 \times 10^{-2}$                    | 2.5                  | <b><math>7.5 \times 10^{-3}</math></b> | N/A                  | 1.0 | $6.8 \times 10^{-1}$                   | $1.5 \times 10^2$      | $7.7 \times 10^{-1}$                   |
| W218G   | $1.5 \times 10^{-1}$      | <b>0</b>                               | $1.4 \times 10^5$                               | <b><math>3.1 \times 10^{-2}</math></b>  | 3.7                  | <b><math>5.0 \times 10^{-3}</math></b> | $4.9 \times 10^{-1}$ | N/A | <b>0</b>                               | $5.5 \times 10^1$      | $8.4 \times 10^{-2}$                   |
| W218V   | $3.1 \times 10^{-1}$      | <b>0</b>                               | $7.8 \times 10^4$                               | <b><math>2.0 \times 10^{-2}</math></b>  | 4.1                  | <b><math>2.3 \times 10^{-3}</math></b> | $4.2 \times 10^{-1}$ | N/A | <b>0</b>                               | $6.3 \times 10^1$      | $9.9 \times 10^{-2}$                   |
| N219G   | $9.7 \times 10^{-1}$      | $8.8 \times 10^{-1}$                   | $3.5 \times 10^5$                               | $1.4 \times 10^{-1}$                    | 2.0                  | $1.4 \times 10^{-2}$                   | $9.6 \times 10^{-1}$ | N/A | $3.0 \times 10^{-1}$                   | $1.1 \times 10^2$      | $4.4 \times 10^{-1}$                   |
| N219V   | $9.6 \times 10^{-1}$      | $7.3 \times 10^{-1}$                   | $4.7 \times 10^5$                               | $3.8 \times 10^{-1}$                    | 1.4                  | $3.0 \times 10^{-1}$                   | $9.9 \times 10^{-1}$ | N/A | $8.5 \times 10^{-1}$                   | $1.9 \times 10^2$      | $2.0 \times 10^{-1}$                   |
| T220G   | $4.4 \times 10^{-1}$      | <b><math>8.0 \times 10^{-3}</math></b> | $5.4 \times 10^5$                               | $7.7 \times 10^{-1}$                    | $8.5 \times 10^{-1}$ | $6.8 \times 10^{-1}$                   | $7.9 \times 10^{-1}$ | N/A | <b><math>3.0 \times 10^{-4}</math></b> | $1.5 \times 10^2$      | $8.5 \times 10^{-1}$                   |
| T220V   | 1.0                       | $9.0 \times 10^{-1}$                   | $3.6 \times 10^5$                               | $1.5 \times 10^{-1}$                    | 1.4                  | $3.1 \times 10^{-1}$                   | N/A                  | 1.0 | $4.3 \times 10^{-1}$                   | $1.4 \times 10^2$      | $9.7 \times 10^{-1}$                   |
| L221G   | $9.8 \times 10^{-1}$      | $9.5 \times 10^{-1}$                   | $1.9 \times 10^5$                               | $1.1 \times 10^{-1}$                    | 2.3                  | $2.4 \times 10^{-2}$                   | $8.9 \times 10^{-1}$ | N/A | $5.2 \times 10^{-2}$                   | $9.5 \times 10^1$      | $4.4 \times 10^{-1}$                   |
| L221V   | 1.1                       | $7.3 \times 10^{-1}$                   | $4.0 \times 10^5$                               | $3.4 \times 10^{-1}$                    | 1.6                  | $1.5 \times 10^{-1}$                   | N/A                  | 1.0 | $7.7 \times 10^{-1}$                   | $1.6 \times 10^2$      | $8.3 \times 10^{-1}$                   |
| L222G   | $8.2 \times 10^{-1}$      | $4.7 \times 10^{-1}$                   | $3.3 \times 10^5$                               | $2.3 \times 10^{-1}$                    | 1.6                  | $6.3 \times 10^{-2}$                   | $8.4 \times 10^{-1}$ | N/A | $1.6 \times 10^{-2}$                   | $1.1 \times 10^2$      | $5.0 \times 10^{-1}$                   |
| L222V   | $8.0 \times 10^{-1}$      | $3.3 \times 10^{-1}$                   | $4.5 \times 10^5$                               | $3.4 \times 10^{-1}$                    | $9.7 \times 10^{-1}$ | $8.5 \times 10^{-1}$                   | N/A                  | 1.1 | $1.4 \times 10^{-1}$                   | $1.7 \times 10^2$      | $5.1 \times 10^{-1}$                   |
| P223G   | $9.9 \times 10^{-1}$      | $9.6 \times 10^{-1}$                   | $3.7 \times 10^5$                               | $2.8 \times 10^{-1}$                    | 1.5                  | $1.9 \times 10^{-1}$                   | $8.2 \times 10^{-1}$ | N/A | <b><math>2.2 \times 10^{-3}</math></b> | $1.1 \times 10^2$      | $4.8 \times 10^{-1}$                   |
| P223V   | 1.1                       | $6.7 \times 10^{-1}$                   | $1.4 \times 10^5$                               | <b><math>3.4 \times 10^{-2}</math></b>  | 2.5                  | <b><math>6.7 \times 10^{-3}</math></b> | $9.7 \times 10^{-1}$ | N/A | $5.7 \times 10^{-1}$                   | $1.2 \times 10^2$      | $6.3 \times 10^{-1}$                   |
| I224G   | 1.0                       | $9.8 \times 10^{-1}$                   | $5.1 \times 10^5$                               | $6.5 \times 10^{-1}$                    | $8.6 \times 10^{-1}$ | $6.4 \times 10^{-1}$                   | $8.8 \times 10^{-1}$ | N/A | $4.8 \times 10^{-2}$                   | $1.2 \times 10^2$      | $6.1 \times 10^{-1}$                   |
| I224V   | $5.2 \times 10^{-1}$      | $2.4 \times 10^{-2}$                   | $5.7 \times 10^5$                               | $8.3 \times 10^{-1}$                    | $9.4 \times 10^{-1}$ | $7.9 \times 10^{-1}$                   | N/A                  | 1.2 | <b><math>1.1 \times 10^{-3}</math></b> | $1.3 \times 10^2$      | $8.2 \times 10^{-1}$                   |
| N225G   | 1.8                       | $7.2 \times 10^{-2}$                   | $2.2 \times 10^5$                               | $1.2 \times 10^{-1}$                    | 1.8                  | $8.6 \times 10^{-2}$                   | $9.9 \times 10^{-1}$ | N/A | $7.9 \times 10^{-1}$                   | $1.3 \times 10^2$      | $8.8 \times 10^{-1}$                   |
| N225V   | 1.1                       | $6.3 \times 10^{-1}$                   | $5.0 \times 10^5$                               | $5.2 \times 10^{-1}$                    | 1.0                  | $8.9 \times 10^{-1}$                   | N/A                  | 1.1 | <b><math>5.7 \times 10^{-3}</math></b> | $1.8 \times 10^2$      | $2.9 \times 10^{-1}$                   |
| Q226G   | $9.2 \times 10^{-1}$      | $8.0 \times 10^{-1}$                   | $3.0 \times 10^5$                               | $2.1 \times 10^{-1}$                    | 1.9                  | $6.8 \times 10^{-2}$                   | $7.2 \times 10^{-1}$ | N/A | <b><math>2.0 \times 10^{-4}</math></b> | $9.3 \times 10^1$      | $4.0 \times 10^{-1}$                   |
| Q226V   | 1.3                       | $1.2 \times 10^{-1}$                   | $3.7 \times 10^5$                               | $6.5 \times 10^{-2}$                    | 1.0                  | $9.2 \times 10^{-1}$                   | N/A                  | 1.1 | $1.5 \times 10^{-1}$                   | $1.4 \times 10^2$      | $9.8 \times 10^{-1}$                   |
| Y227G   | $3.5 \times 10^{-1}$      | <b><math>1.0 \times 10^{-3}</math></b> | $4.0 \times 10^5$                               | $3.6 \times 10^{-1}$                    | $7.3 \times 10^{-1}$ | $5.2 \times 10^{-1}$                   | $4.9 \times 10^{-1}$ | N/A | <b><math>2.0 \times 10^{-4}</math></b> | $8.7 \times 10^1$      | $2.9 \times 10^{-1}$                   |
| Y227V   | $5.2 \times 10^{-1}$      | $2.2 \times 10^{-2}$                   | $3.7 \times 10^5$                               | $2.4 \times 10^{-1}$                    | 1.1                  | $9.0 \times 10^{-1}$                   | $6.9 \times 10^{-1}$ | N/A | <b><math>4.0 \times 10^{-4}</math></b> | $1.0 \times 10^2$      | $4.8 \times 10^{-1}$                   |
| T228G   | $5.3 \times 10^{-1}$      | $1.8 \times 10^{-2}$                   | $2.3 \times 10^5$                               | <b><math>4.4 \times 10^{-2}</math></b>  | 4.2                  | <b><math>1. \times 10^{-4}</math></b>  | N/A                  | 1.0 | $4.8 \times 10^{-1}$                   | $1.7 \times 10^2$      | $6.0 \times 10^{-1}$                   |
| T228V   | $8.1 \times 10^{-1}$      | $2.7 \times 10^{-1}$                   | $5.3 \times 10^5$                               | $5.7 \times 10^{-1}$                    | $9.2 \times 10^{-1}$ | $8.3 \times 10^{-1}$                   | N/A                  | 1.1 | $7.7 \times 10^{-2}$                   | $1.5 \times 10^2$      | $7.5 \times 10^{-1}$                   |
| E229G   | $6.3 \times 10^{-1}$      | $5.0 \times 10^{-2}$                   | $2.6 \times 10^5$                               | $8.0 \times 10^{-2}$                    | 1.4                  | $2.1 \times 10^{-1}$                   | $8.6 \times 10^{-1}$ | N/A | <b><math>8.7 \times 10^{-3}</math></b> | $8.7 \times 10^1$      | $2.4 \times 10^{-1}$                   |
| E229V   | $5.8 \times 10^{-1}$      | $1.5 \times 10^{-2}$                   | $2.4 \times 10^5$                               | $1.2 \times 10^{-1}$                    | 2.2                  | $3.7 \times 10^{-2}$                   | $9.5 \times 10^{-1}$ | N/A | $2.7 \times 10^{-1}$                   | $1.1 \times 10^2$      | $5.5 \times 10^{-1}$                   |
| S230G   | $\leq 5.2 \times 10^{-1}$ | $1.4 \times 10^{-2}$                   | $\leq 5.5 \times 10^5$                          | $7.6 \times 10^{-1}$                    | $\leq 1.1$           | $8.2 \times 10^{-1}$                   | $8.0 \times 10^{-1}$ | N/A | <b><math>1.0 \times 10^{-3}</math></b> | $\geq 8.4 \times 10^1$ | $2.3 \times 10^{-1}$                   |
| S230V   | $3.7 \times 10^{-1}$      | <b><math>1.0 \times 10^{-3}</math></b> | $5.6 \times 10^5$                               | $7.8 \times 10^{-1}$                    | $9.1 \times 10^{-1}$ | $7.9 \times 10^{-1}$                   | $5.8 \times 10^{-1}$ | N/A | <b><math>1. \times 10^{-4}</math></b>  | $1.1 \times 10^2$      | $4.3 \times 10^{-1}$                   |
| S231G   | $9.3 \times 10^{-1}$      | $7.5 \times 10^{-1}$                   | $4.2 \times 10^5$                               | $3.6 \times 10^{-1}$                    | $8.8 \times 10^{-1}$ | $6.9 \times 10^{-1}$                   | $7.9 \times 10^{-1}$ | N/A | <b><math>7.0 \times 10^{-4}</math></b> | $5.9 \times 10^1$      | $1.9 \times 10^{-1}$                   |
| S231V   | $7.0 \times 10^{-1}$      | $1.4 \times 10^{-1}$                   | $4.9 \times 10^5$                               | $5.4 \times 10^{-1}$                    | 1.2                  | $5.9 \times 10^{-1}$                   | $9.4 \times 10^{-1}$ | N/A | $2.4 \times 10^{-1}$                   | $1.2 \times 10^2$      | $6.3 \times 10^{-1}$                   |
| E232G   | $8.6 \times 10^{-1}$      | $5.5 \times 10^{-1}$                   | $4.1 \times 10^5$                               | $3.4 \times 10^{-1}$                    | 1.6                  | $7.9 \times 10^{-2}$                   | N/A                  | 1.0 | $8.9 \times 10^{-1}$                   | $1.5 \times 10^2$      | $8.7 \times 10^{-1}$                   |
| E232V   | $6.5 \times 10^{-1}$      | $1.1 \times 10^{-1}$                   | $7.9 \times 10^5$                               | $3.9 \times 10^{-1}$                    | $8.2 \times 10^{-1}$ | $5.7 \times 10^{-1}$                   | $9.3 \times 10^{-1}$ | N/A | $2.2 \times 10^{-1}$                   | $1.4 \times 10^2$      | $9.7 \times 10^{-1}$                   |
| D233G   | $3.2 \times 10^{-1}$      | <b>0</b>                               | $9.1 \times 10^4$                               | <b><math>1.9 \times 10^{-2}</math></b>  | 4.5                  | <b><math>1.1 \times 10^{-3}</math></b> | $2.7 \times 10^{-1}$ | N/A | <b>0</b>                               | $4.1 \times 10^1$      | $5.0 \times 10^{-2}$                   |
| D233V   | $5.8 \times 10^{-1}$      | $1.3 \times 10^{-2}$                   | $1.5 \times 10^5$                               | <b><math>2.8 \times 10^{-2}</math></b>  | 3.3                  | <b><math>3.7 \times 10^{-3}</math></b> | $3.4 \times 10^{-1}$ | N/A | <b>0</b>                               | $5.9 \times 10^1$      | $9.2 \times 10^{-2}$                   |
| N234G   | $9.6 \times 10^{-1}$      | $8.9 \times 10^{-1}$                   | $4.4 \times 10^5$                               | $4.4 \times 10^{-1}$                    | 1.3                  | $3.9 \times 10^{-1}$                   | $9.1 \times 10^{-1}$ | N/A | $1.3 \times 10^{-1}$                   | $1.0 \times 10^2$      | $5.1 \times 10^{-1}$                   |
| N234V   | $9.4 \times 10^{-1}$      | $8.0 \times 10^{-1}$                   | $2.2 \times 10^5$                               | $6.0 \times 10^{-2}$                    | 3.0                  | <b><math>2.3 \times 10^{-3}</math></b> | $9.9 \times 10^{-1}$ | N/A | $6.7 \times 10^{-1}$                   | $1.3 \times 10^2$      | $8.8 \times 10^{-1}$                   |
| V235A   | 1.5                       | $7.1 \times 10^{-2}$                   | $2.7 \times 10^5$                               | $9.7 \times 10^{-2}$                    | 2.0                  | $3.8 \times 10^{-2}$                   | N/A                  | 1.0 | $7.3 \times 10^{-1}$                   | $1.3 \times 10^2$      | $8.9 \times 10^{-1}$                   |
| V235G   | $4.4 \times 10^{-1}$      | <b><math>4.0 \times 10^{-3}</math></b> | $6.5 \times 10^5$                               | $8.5 \times 10^{-1}$                    | 1.7                  | $1.1 \times 10^{-1}$                   | $9.7 \times 10^{-1}$ | N/A | $4.5 \times 10^{-1}$                   | $1.6 \times 10^2$      | $6.7 \times 10^{-1}$                   |
| E236G   | $7.7 \times 10^{-1}$      | $3.1 \times 10^{-1}$                   | $5.2 \times 10^5$                               | $5.3 \times 10^{-1}$                    | 1.2                  | $5.0 \times 10^{-1}$                   | $8.3 \times 10^{-1}$ | N/A | <b><math>8.9 \times 10^{-3}</math></b> | $1.2 \times 10^2$      | $6.9 \times 10^{-1}$                   |
| E236V   | $8.5 \times 10^{-1}$      | $4.4 \times 10^{-1}$                   | $6.8 \times 10^5$                               | $6.6 \times 10^{-1}$                    | $9.1 \times 10^{-1}$ | $7.0 \times 10^{-1}$                   | N/A                  | 1.0 | $6.2 \times 10^{-1}$                   | $1.8 \times 10^2$      | $3.7 \times 10^{-1}$                   |
| W237G   | $7.7 \times 10^{-1}$      | $2.4 \times 10^{-1}$                   | $9.5 \times 10^4$                               | <b><math>1.5 \times 10^{-2}</math></b>  | 3.3                  | <b><math>6.1 \times 10^{-4}</math></b> | $2.9 \times 10^{-1}$ | N/A | <b>0</b>                               | $4.4 \times 10^1$      | $5.5 \times 10^{-2}$                   |
| W237V   | $\leq 3.6 \times 10^{-1}$ | <b>0</b>                               | $\leq 7.5 \times 10^4$                          | <b><math>1.6 \times 10^{-2}</math></b>  | $\leq 3.4$           | <b><math>5.4 \times 10^{-3}</math></b> | $3.6 \times 10^{-1}$ | N/A | <b>0</b>                               | $\geq 3.1 \times 10^1$ | $5.3 \times 10^{-2}$                   |
| E238G   | $2.9 \times 10^{-1}$      | <b>0</b>                               | $1.7 \times 10^5$                               | <b><math>3.2 \times 10^{-2}</math></b>  | 1.9                  | $1.7 \times 10^{-2}$                   | $3.1 \times 10^{-1}$ | N/A | <b>0</b>                               | $4.5 \times 10^1$      | $5.8 \times 10^{-2}$                   |
| E238V   | $7.4 \times 10^{-1}$      | $3.2 \times 10^{-1}$                   | $9.5 \times 10^4$                               | $9.5 \times 10^{-2}$                    | 2.4                  | $2.9 \times 10^{-2}$                   | $3.5 \times 10^{-1}$ | N/A | <b><math>2.0 \times 10^{-4}</math></b> | $5.5 \times 10^1$      | $1.7 \times 10^{-1}$                   |
| G239A   | $6.6 \times 10^{-1}$      | $9.4 \times 10^{-2}$                   | $6.4 \times 10^5$                               | $8.8 \times 10^{-1}$                    | 1.7                  | $7.2 \times 10^{-2}$                   | $9.0 \times 10^{-1}$ | N/A | $1.4 \times 10^{-1}$                   | $9.9 \times 10^1$      | $3.6 \times 10^{-1}$                   |
| G239V   | $7.8 \times 10^{-1}$      | $2.7 \times 10^{-1}$                   | $4.3 \times 10^5$                               | $2.7 \times 10^{-1}$                    | 1.1                  | $6.2 \times 10^{-1}$                   | $9.8 \times 10^{-1}$ | N/A | $6.4 \times 10^{-1}$                   | $1.4 \times 10^2$      | $9.3 \times 10^{-1}$                   |
| L240G   | 1.7                       | $9.4 \times 10^{-2}$                   | $4.5 \times 10^5$                               | $4.6 \times 10^{-1}$                    | $8.9 \times 10^{-1}$ | $6.8 \times 10^{-1}$                   | $7.9 \times 10^{-1}$ | N/A | <b><math>6.0 \times 10^{-3}</math></b> | $7.9 \times 10^1$      | $3.0 \times 10^{-1}$                   |
| L240V   | $5.6 \times 10^{-1}$      | $3.1 \times 10^{-2}$                   | $6.7 \times 10^5$                               | $7.3 \times 10^{-1}$                    | $9.6 \times 10^{-1}$ | $8.6 \times 10^{-1}$                   | N/A                  | 1.1 | $1.3 \times 10^{-2}$                   | $1.3 \times 10^2$      | $9.0 \times 10^{-1}$                   |
| L241G   | $3.8 \times 10^{-1}$      | <b>0</b>                               | $2.0 \times 10^5$                               | <b><math>4.0 \times 10^{-2}</math></b>  | 1.9                  | $1.7 \times 10^{-2}$                   | $3.4 \times 10^{-1}$ | N/A | <b>0</b>                               | $3.9 \times 10^1$      | <b><math>4.8 \times 10^{-2}</math></b> |
| L241V   | 1.0                       | $9.9 \times 10^{-1}$                   | $3.5 \times 10^5$                               | $1.4 \times 10^{-1}$                    | 1.3                  | $4.2 \times 10^{-1}$                   | $9.5 \times 10^{-1}$ | N/A | $4.3 \times 10^{-1}$                   | $1.1 \times 10^2$      | $4.7 \times 10^{-1}$                   |
| G242A   | $6.5 \times 10^{-1}$      | $1.3 \times 10^{-1}$                   | $5.8 \times 10^5$                               | $8.9 \times 10^{-1}$                    | $8.9 \times 10^{-1}$ | $7.3 \times 10^{-1}$                   | $6.9 \times 10^{-1}$ | N/A | <b><math>6.0 \times 10^{-4}</math></b> | $1.4 \times 10^2$      | $9.4 \times 10^{-1}$                   |
| G242V   | $7.3 \times 10^{-1}$      | $1.6 \times 10^{-1}$                   | $2.6 \times 10^5$                               | $7.2 \times 10^{-2}$                    | 1.9                  | $6.5 \times 10^{-2}$                   | $7.9 \times 10^{-1}$ | N/A | <b><math>6.0 \times 10^{-4}</math></b> | $1.1 \times 10^2$      | $4.8 \times 10^{-1}$                   |
| S243G   | $9.2 \times 10^{-1}$      | $8.2 \times 10^{-1}$                   | $4.3 \times 10^5$                               | $3.2 \times 10^{-1}$                    | 1.1                  | $8.7 \times 10^{-1}$                   | $8.6 \times 10^{-1}$ | N/A | <b><math>8.2 \times 10^{-3}</math></b> | $9.5 \times 10^1$      | $3.2 \times 10^{-1}$                   |
| S243V   | $7.8 \times 10^{-1}$      |                                        |                                                 |                                         |                      |                                        |                      |     |                                        |                        |                                        |

| Variant | $f_a$                | $f_a$ $p$ -value                       | $(k_{cat}/K_M)_{chem}^{MEP}$ ( $M^{-1}s^{-1}$ ) | $(k_{cat}/K_M)_{chem}^{MEP}$ $p$ -value | FC1                  | FC1 $p$ -value                         | FC2                  | FC3 | FC2/3 $p$ -value                       | FC4 ( $s^{-1}$ )       | FC4 $p$ -value                         |
|---------|----------------------|----------------------------------------|-------------------------------------------------|-----------------------------------------|----------------------|----------------------------------------|----------------------|-----|----------------------------------------|------------------------|----------------------------------------|
| P250G   | $5.4 \times 10^{-1}$ | $2.8 \times 10^{-2}$                   | $7.1 \times 10^4$                               | <b><math>1.6 \times 10^{-2}</math></b>  | 5.4                  | <b><math>4.6 \times 10^{-4}</math></b> | $8.4 \times 10^{-1}$ | N/A | $1.8 \times 10^{-2}$                   | $7.6 \times 10^1$      | $2.1 \times 10^{-1}$                   |
| P250V   | $5.3 \times 10^{-1}$ | $2.2 \times 10^{-2}$                   | $7.9 \times 10^5$                               | $4.2 \times 10^{-1}$                    | $6.8 \times 10^{-1}$ | $3.6 \times 10^{-1}$                   | $9.2 \times 10^{-1}$ | N/A | $1.7 \times 10^{-1}$                   | $1.3 \times 10^2$      | $8.9 \times 10^{-1}$                   |
| Y251G   | $2.0 \times 10^{-1}$ | <b>0</b>                               | $1.2 \times 10^5$                               | <b><math>1.9 \times 10^{-2}</math></b>  | 4.0                  | <b><math>1.1 \times 10^{-3}</math></b> | $2.7 \times 10^{-1}$ | N/A | <b>0</b>                               | $4.4 \times 10^1$      | <b><math>4.4 \times 10^{-2}</math></b> |
| Y251V   | $4.0 \times 10^{-1}$ | <b><math>1.0 \times 10^{-3}</math></b> | $6.5 \times 10^5$                               | $8.4 \times 10^{-1}$                    | $7.4 \times 10^{-1}$ | $3.9 \times 10^{-1}$                   | $8.3 \times 10^{-1}$ | N/A | <b><math>9.6 \times 10^{-3}</math></b> | $1.2 \times 10^2$      | $7.5 \times 10^{-1}$                   |
| T252G   | 1.4                  | $2.0 \times 10^{-1}$                   | $3.9 \times 10^5$                               | $2.4 \times 10^{-1}$                    | $9.6 \times 10^{-1}$ | $8.7 \times 10^{-1}$                   | $9.6 \times 10^{-1}$ | N/A | $4.9 \times 10^{-1}$                   | $1.4 \times 10^2$      | 1.0                                    |
| T252V   | 1.0                  | $8.4 \times 10^{-1}$                   | $4.2 \times 10^5$                               | $3.9 \times 10^{-1}$                    | $8.9 \times 10^{-1}$ | $7.6 \times 10^{-1}$                   | N/A                  | 1.1 | $3.4 \times 10^{-1}$                   | $1.7 \times 10^2$      | $5.2 \times 10^{-1}$                   |
| D253G   | $8.7 \times 10^{-1}$ | $4.9 \times 10^{-1}$                   | $4.3 \times 10^5$                               | $2.5 \times 10^{-1}$                    | 1.7                  | $7.4 \times 10^{-2}$                   | $8.7 \times 10^{-1}$ | N/A | $1.0 \times 10^{-2}$                   | $1.2 \times 10^2$      | $5.5 \times 10^{-1}$                   |
| D253V   | $9.2 \times 10^{-1}$ | $6.8 \times 10^{-1}$                   | $5.1 \times 10^5$                               | $6.2 \times 10^{-1}$                    | $8.4 \times 10^{-1}$ | $5.1 \times 10^{-1}$                   | $9.7 \times 10^{-1}$ | N/A | $5.3 \times 10^{-1}$                   | $9.6 \times 10^1$      | $3.3 \times 10^{-1}$                   |
| L254G   | 1.0                  | $9.8 \times 10^{-1}$                   | $3.8 \times 10^5$                               | $2.5 \times 10^{-1}$                    | $8.6 \times 10^{-1}$ | $6.1 \times 10^{-1}$                   | $7.0 \times 10^{-1}$ | N/A | <b><math>1. \times 10^{-4}</math></b>  | $5.7 \times 10^1$      | $1.6 \times 10^{-1}$                   |
| L254V   | 1.2                  | $4.6 \times 10^{-1}$                   | $7.4 \times 10^5$                               | $3.8 \times 10^{-1}$                    | $6.2 \times 10^{-1}$ | $2.3 \times 10^{-1}$                   | $9.9 \times 10^{-1}$ | N/A | $7.7 \times 10^{-1}$                   | $1.2 \times 10^2$      | $7.3 \times 10^{-1}$                   |
| A255G   | 1.0                  | $8.2 \times 10^{-1}$                   | $2.3 \times 10^5$                               | $8.2 \times 10^{-2}$                    | 3.3                  | <b><math>3.3 \times 10^{-3}</math></b> | $8.5 \times 10^{-1}$ | N/A | <b><math>5.6 \times 10^{-3}</math></b> | $1.0 \times 10^2$      | $3.8 \times 10^{-1}$                   |
| A255V   | $9.0 \times 10^{-1}$ | $4.3 \times 10^{-1}$                   | $4.9 \times 10^5$                               | $3.9 \times 10^{-1}$                    | 1.0                  | $9.4 \times 10^{-1}$                   | $8.9 \times 10^{-1}$ | N/A | $1.4 \times 10^{-2}$                   | $1.3 \times 10^2$      | $7.6 \times 10^{-1}$                   |
| K256G   | 1.1                  | $6.3 \times 10^{-1}$                   | $3.9 \times 10^5$                               | $3.4 \times 10^{-1}$                    | 1.6                  | $1.1 \times 10^{-1}$                   | $8.7 \times 10^{-1}$ | N/A | $1.7 \times 10^{-2}$                   | $1.1 \times 10^2$      | $4.8 \times 10^{-1}$                   |
| K256V   | $3.0 \times 10^{-1}$ | <b><math>1.0 \times 10^{-3}</math></b> | $3.7 \times 10^5$                               | $2.1 \times 10^{-1}$                    | -                    | -                                      | N/A                  | 1.1 | $4.7 \times 10^{-1}$                   | $1.5 \times 10^2$      | $8.3 \times 10^{-1}$                   |
| D257G   | 1.6                  | $1.3 \times 10^{-1}$                   | $2.1 \times 10^5$                               | $1.2 \times 10^{-1}$                    | 2.1                  | $2.4 \times 10^{-2}$                   | $6.8 \times 10^{-1}$ | N/A | <b><math>1.9 \times 10^{-3}</math></b> | $4.1 \times 10^1$      | $1.3 \times 10^{-1}$                   |
| D257V   | 1.2                  | $3.6 \times 10^{-1}$                   | $1.2 \times 10^5$                               | <b><math>4.9 \times 10^{-2}</math></b>  | 3.5                  | <b><math>2.7 \times 10^{-3}</math></b> | $8.3 \times 10^{-1}$ | N/A | <b><math>7.3 \times 10^{-3}</math></b> | $1.1 \times 10^2$      | $5.2 \times 10^{-1}$                   |
| Y258G   | 1.3                  | $2.7 \times 10^{-1}$                   | $2.9 \times 10^5$                               | $1.2 \times 10^{-1}$                    | 1.3                  | $3.1 \times 10^{-1}$                   | $8.1 \times 10^{-1}$ | N/A | <b><math>6.0 \times 10^{-3}</math></b> | $1.1 \times 10^2$      | $5.8 \times 10^{-1}$                   |
| Y258V   | 1.3                  | $1.8 \times 10^{-1}$                   | $6.4 \times 10^5$                               | $8.3 \times 10^{-1}$                    | $8.0 \times 10^{-1}$ | $6.3 \times 10^{-1}$                   | $8.4 \times 10^{-1}$ | N/A | $1.1 \times 10^{-2}$                   | $1.3 \times 10^2$      | $8.8 \times 10^{-1}$                   |
| E259G   | 1.3                  | $2.8 \times 10^{-1}$                   | $1.7 \times 10^5$                               | <b><math>4.3 \times 10^{-2}</math></b>  | 3.8                  | <b><math>2.3 \times 10^{-4}</math></b> | $7.2 \times 10^{-1}$ | N/A | <b>0</b>                               | $1.2 \times 10^2$      | $5.7 \times 10^{-1}$                   |
| E259V   | 1.2                  | $5.6 \times 10^{-1}$                   | $4.3 \times 10^5$                               | $3.4 \times 10^{-1}$                    | 1.4                  | $3.4 \times 10^{-1}$                   | $9.4 \times 10^{-1}$ | N/A | $2.7 \times 10^{-1}$                   | $1.7 \times 10^2$      | $5.0 \times 10^{-1}$                   |
| A260G   | 1.4                  | $3.0 \times 10^{-1}$                   | $3.0 \times 10^5$                               | $1.5 \times 10^{-1}$                    | 1.9                  | $2.2 \times 10^{-2}$                   | $9.4 \times 10^{-1}$ | N/A | $1.8 \times 10^{-1}$                   | $6.5 \times 10^1$      | $2.1 \times 10^{-1}$                   |
| A260V   | 1.4                  | $9.3 \times 10^{-2}$                   | $3.3 \times 10^5$                               | $9.9 \times 10^{-2}$                    | 1.1                  | $6.8 \times 10^{-1}$                   | N/A                  | 1.1 | $9.2 \times 10^{-2}$                   | $1.4 \times 10^2$      | 1.0                                    |
| K261G   | $6.2 \times 10^{-1}$ | $1.0 \times 10^{-1}$                   | $1.0 \times 10^6$                               | $1.1 \times 10^{-1}$                    | 1.1                  | $8.9 \times 10^{-1}$                   | N/A                  | 1.0 | $5.1 \times 10^{-1}$                   | $1.3 \times 10^2$      | $8.1 \times 10^{-1}$                   |
| K261V   | $9.6 \times 10^{-1}$ | $8.5 \times 10^{-1}$                   | $4.5 \times 10^5$                               | $4.2 \times 10^{-1}$                    | 1.0                  | $9.9 \times 10^{-1}$                   | N/A                  | 1.0 | $7.9 \times 10^{-1}$                   | $1.2 \times 10^2$      | $7.1 \times 10^{-1}$                   |
| K262G   | 1.1                  | $7.0 \times 10^{-1}$                   | $4.1 \times 10^5$                               | $2.8 \times 10^{-1}$                    | 2.1                  | $1.4 \times 10^{-2}$                   | $7.5 \times 10^{-1}$ | N/A | <b>0</b>                               | $1.1 \times 10^2$      | $4.4 \times 10^{-1}$                   |
| K262V   | $9.2 \times 10^{-1}$ | $6.6 \times 10^{-1}$                   | $4.7 \times 10^5$                               | $3.9 \times 10^{-1}$                    | 1.6                  | $1.1 \times 10^{-1}$                   | $8.7 \times 10^{-1}$ | N/A | $1.6 \times 10^{-2}$                   | $1.3 \times 10^2$      | $8.3 \times 10^{-1}$                   |
| G263A   | $7.6 \times 10^{-1}$ | $2.2 \times 10^{-1}$                   | $5.2 \times 10^5$                               | $6.6 \times 10^{-1}$                    | 1.9                  | $5.9 \times 10^{-2}$                   | $9.2 \times 10^{-1}$ | N/A | $7.9 \times 10^{-2}$                   | $1.3 \times 10^2$      | $8.1 \times 10^{-1}$                   |
| G263V   | $7.5 \times 10^{-1}$ | $1.2 \times 10^{-1}$                   | $8.3 \times 10^5$                               | $1.5 \times 10^{-1}$                    | $9.7 \times 10^{-1}$ | $9.5 \times 10^{-1}$                   | $8.7 \times 10^{-1}$ | N/A | $2.4 \times 10^{-2}$                   | $1.6 \times 10^2$      | $7.3 \times 10^{-1}$                   |
| L264G   | $7.2 \times 10^{-1}$ | $1.3 \times 10^{-1}$                   | $4.6 \times 10^5$                               | $3.9 \times 10^{-1}$                    | 1.2                  | $5.0 \times 10^{-1}$                   | $6.5 \times 10^{-1}$ | N/A | <b>0</b>                               | $1.1 \times 10^2$      | $4.6 \times 10^{-1}$                   |
| L264V   | $4.1 \times 10^{-1}$ | $1.0 \times 10^{-2}$                   | $1.3 \times 10^6$                               | <b><math>2.7 \times 10^{-2}</math></b>  | -                    | -                                      | N/A                  | 1.1 | $5.1 \times 10^{-2}$                   | $1.8 \times 10^2$      | $5.7 \times 10^{-1}$                   |
| I265G   | $5.3 \times 10^{-1}$ | <b><math>3.0 \times 10^{-3}</math></b> | $1.4 \times 10^5$                               | <b><math>3.6 \times 10^{-2}</math></b>  | 3.5                  | <b><math>1.8 \times 10^{-3}</math></b> | $4.9 \times 10^{-1}$ | N/A | <b>0</b>                               | $6.3 \times 10^1$      | $1.1 \times 10^{-1}$                   |
| I265V   | $6.6 \times 10^{-1}$ | $1.9 \times 10^{-1}$                   | $1.1 \times 10^6$                               | $1.2 \times 10^{-1}$                    | $4.3 \times 10^{-1}$ | $1.2 \times 10^{-2}$                   | $9.0 \times 10^{-1}$ | N/A | $5.1 \times 10^{-2}$                   | $1.0 \times 10^2$      | $4.8 \times 10^{-1}$                   |
| R266G   | $\leq 1.6$           | $3.3 \times 10^{-2}$                   | $\leq 8.4 \times 10^4$                          | <b><math>2.9 \times 10^{-2}</math></b>  | $\leq 7.7$           | <b>0</b>                               | N/A                  | 1.1 | $2.6 \times 10^{-1}$                   | $\geq 8.4 \times 10^1$ | $2.2 \times 10^{-1}$                   |
| R266V   | 1.2                  | $4.3 \times 10^{-1}$                   | $7.6 \times 10^4$                               | <b><math>7.0 \times 10^{-3}</math></b>  | $1.8 \times 10^1$    | <b>0</b>                               | N/A                  | 2.8 | <b>0</b>                               | $2.1 \times 10^2$      | $1.2 \times 10^{-1}$                   |
| T267G   | 1.9                  | $2.3 \times 10^{-2}$                   | $3.0 \times 10^5$                               | $1.6 \times 10^{-1}$                    | 1.6                  | $1.3 \times 10^{-1}$                   | $7.3 \times 10^{-1}$ | N/A | <b><math>3.0 \times 10^{-4}</math></b> | $6.1 \times 10^1$      | $1.3 \times 10^{-1}$                   |
| T267V   | 1.5                  | $6.6 \times 10^{-2}$                   | $3.1 \times 10^5$                               | $7.1 \times 10^{-2}$                    | $9.6 \times 10^{-1}$ | $9.3 \times 10^{-1}$                   | $9.8 \times 10^{-1}$ | N/A | $6.4 \times 10^{-1}$                   | $1.4 \times 10^2$      | $9.3 \times 10^{-1}$                   |
| T268V   | 1.5                  | $6.1 \times 10^{-2}$                   | $3.1 \times 10^5$                               | $5.6 \times 10^{-2}$                    | 1.2                  | $4.6 \times 10^{-1}$                   | $8.8 \times 10^{-1}$ | N/A | <b><math>6.0 \times 10^{-3}</math></b> | $1.1 \times 10^2$      | $4.4 \times 10^{-1}$                   |
| P269G   | 1.0                  | $9.6 \times 10^{-1}$                   | $2.2 \times 10^5$                               | $7.7 \times 10^{-2}$                    | 1.1                  | $7.5 \times 10^{-1}$                   | N/A                  | 1.2 | <b><math>4.0 \times 10^{-3}</math></b> | $1.3 \times 10^2$      | $8.3 \times 10^{-1}$                   |
| P269V   | 1.6                  | $4.3 \times 10^{-2}$                   | $1.5 \times 10^5$                               | <b><math>4.2 \times 10^{-2}</math></b>  | 1.5                  | $1.1 \times 10^{-1}$                   | $9.3 \times 10^{-1}$ | N/A | $1.2 \times 10^{-1}$                   | $1.2 \times 10^2$      | $6.6 \times 10^{-1}$                   |
| F270G   | 1.0                  | $9.4 \times 10^{-1}$                   | $3.6 \times 10^5$                               | $2.1 \times 10^{-1}$                    | 1.4                  | $1.1 \times 10^{-1}$                   | $7.8 \times 10^{-1}$ | N/A | <b><math>2.0 \times 10^{-4}</math></b> | $5.6 \times 10^1$      | $1.8 \times 10^{-1}$                   |
| F270V   | 1.7                  | $1.5 \times 10^{-2}$                   | $1.8 \times 10^5$                               | <b><math>2.4 \times 10^{-2}</math></b>  | 1.8                  | $5.8 \times 10^{-2}$                   | $9.8 \times 10^{-1}$ | N/A | $6.5 \times 10^{-1}$                   | $1.5 \times 10^2$      | $9.3 \times 10^{-1}$                   |
| G271A   | 1.4                  | $1.9 \times 10^{-1}$                   | $2.1 \times 10^5$                               | $6.7 \times 10^{-2}$                    | 1.2                  | $5.9 \times 10^{-1}$                   | $8.1 \times 10^{-1}$ | N/A | <b><math>5.0 \times 10^{-4}</math></b> | $6.7 \times 10^1$      | $1.3 \times 10^{-1}$                   |
| G271V   | $8.6 \times 10^{-1}$ | $5.4 \times 10^{-1}$                   | $1.1 \times 10^5$                               | <b><math>2.5 \times 10^{-2}</math></b>  | $1.0 \times 10^1$    | <b><math>1.0 \times 10^{-5}</math></b> | $6.7 \times 10^{-1}$ | N/A | <b><math>5.0 \times 10^{-4}</math></b> | $4.8 \times 10^1$      | $6.1 \times 10^{-2}$                   |
| N272G   | $7.8 \times 10^{-1}$ | $3.3 \times 10^{-1}$                   | $1.4 \times 10^5$                               | <b><math>4.6 \times 10^{-2}</math></b>  | 2.8                  | <b><math>4.5 \times 10^{-3}</math></b> | N/A                  | 1.1 | $1.5 \times 10^{-1}$                   | $1.1 \times 10^2$      | $6.0 \times 10^{-1}$                   |
| N272V   | $3.2 \times 10^{-1}$ | <b><math>3.0 \times 10^{-3}</math></b> | $6.4 \times 10^5$                               | $9.0 \times 10^{-1}$                    | -                    | -                                      | $7.4 \times 10^{-1}$ | N/A | <b>0</b>                               | $1.6 \times 10^2$      | $7.8 \times 10^{-1}$                   |
| T273G   | $7.7 \times 10^{-1}$ | $2.8 \times 10^{-1}$                   | $2.1 \times 10^5$                               | $9.1 \times 10^{-2}$                    | 3.1                  | $1.0 \times 10^{-2}$                   | $8.6 \times 10^{-1}$ | N/A | <b><math>3.0 \times 10^{-3}</math></b> | $7.9 \times 10^1$      | $1.9 \times 10^{-1}$                   |
| T273V   | 1.8                  | <b><math>6.0 \times 10^{-3}</math></b> | $9.0 \times 10^4$                               | <b><math>1.5 \times 10^{-2}</math></b>  | 3.5                  | <b><math>4.3 \times 10^{-4}</math></b> | N/A                  | 1.2 | <b><math>2.4 \times 10^{-3}</math></b> | $1.5 \times 10^2$      | $8.6 \times 10^{-1}$                   |
| L274G   | $1.2 \times 10^{-1}$ | <b>0</b>                               | $1.8 \times 10^5$                               | $1.0 \times 10^{-1}$                    | -                    | -                                      | $9.7 \times 10^{-1}$ | N/A | $7.5 \times 10^{-1}$                   | $1.1 \times 10^2$      | $6.6 \times 10^{-1}$                   |
| L274V   | 1.0                  | 1.0                                    | $4.7 \times 10^5$                               | $4.4 \times 10^{-1}$                    | $9.1 \times 10^{-1}$ | $7.4 \times 10^{-1}$                   | N/A                  | 1.1 | $3.1 \times 10^{-1}$                   | $2.0 \times 10^2$      | $2.7 \times 10^{-1}$                   |
| T275G   | $5.9 \times 10^{-1}$ | $2.4 \times 10^{-2}$                   | $1.7 \times 10^5$                               | <b><math>3.3 \times 10^{-2}</math></b>  | 2.5                  | <b><math>2.3 \times 10^{-3}</math></b> | N/A                  | 1.0 | $7.5 \times 10^{-1}$                   | $1.0 \times 10^2$      | $3.6 \times 10^{-1}$                   |
| T275V   | 1.3                  | $3.4 \times 10^{-1}$                   | $2.3 \times 10^5$                               | $6.4 \times 10^{-2}$                    | 2.2                  | $2.3 \times 10^{-2}$                   | 1.0                  | N/A | $8.7 \times 10^{-1}$                   | $1.1 \times 10^2$      | $5.2 \times 10^{-1}$                   |
| L276G   | $2.3 \times 10^{-2}$ | <b>0</b>                               | $2.6 \times 10^5$                               | $1.3 \times 10^{-1}$                    | -                    | -                                      | $6.2 \times 10^{-1}$ | N/A | $2.2 \times 10^{-2}$                   | $1.5 \times 10^2$      | $9.2 \times 10^{-1}$                   |
| L276V   | $9.9 \times 10^{-1}$ | $9.3 \times 10^{-1}$                   | $2.7 \times 10^5$                               | $8.0 \times 10^{-2}$                    | 1.7                  | $1.0 \times 10^{-1}$                   | $9.9 \times 10^{-1}$ | N/A | $8.1 \times 10^{-1}$                   | $1.6 \times 10^2$      | $5.5 \times 10^{-1}$                   |
| Q277G   | 1.2                  | $5.0 \times 10^{-1}$                   | $1.4 \times 10^5$                               | $5.4 \times 10^{-2}$                    | 3.6                  | <b><math>7.1 \times 10^{-4}</math></b> | $9.9 \times 10^{-1}$ | N/A | $6.0 \times 10^{-1}$                   | $1.5 \times 10^2$      | $8.9 \times 10^{-1}$                   |
| Q277V   | $9.7 \times 10^{-1}$ | $8.2 \times 10^{-1}$                   | $3.6 \times 10^5$                               | $1.9 \times 10^{-1}$                    | 1.2                  | $6.6 \times 10^{-1}$                   | N/A                  | 1.0 | $4.3 \times 10^{-1}$                   | $1.7 \times 10^2$      | $5.5 \times 10^{-1}$                   |
| M278G   | $2.3 \times 10^{-1}$ | <b>0</b>                               | $2.8 \times 10^5$                               | $1.6 \times 10^{-1}$                    | -                    | -                                      | $7.9 \times 10^{-1}$ | N/A | <b><math>2.1 \times 10^{-3}</math></b> | $7.4 \times 10^1$      | $2.8 \times 10^{-1}$                   |
| M278V   | $8.4 \times 10^{-1}$ | $3.0 \times 10^{-1}$                   | $4.0 \times 10^5$                               | $1.6 \times 10^{-1}$                    | 1.2                  | $5.9 \times 10^{-1}$                   | N/A                  | 1.1 | $1.4 \times 10^{-1}$                   | $1.4 \times 10^2$      | $9.6 \times 10^{-1}$                   |
| A279G   | $6.4 \times 10^{-1}$ | $1.1 \times 10^{-1}$                   | $2.6 \times 10^5$                               | $1.4 \times 10^{-1}$                    | 1.9                  | $4.0 \times 10^{-2}$                   | $7.7 \times 10^{-1}$ | N/A | <b><math>1.1 \times 10^{-3}</math></b> | $1.2 \times 10^2$      | $7.3 \times 10^{-1}$                   |
| A279V   | $9.8 \times 10^{-1}$ | $9.1 \times 10^{-1}$                   | $2.9 \times 10^5$                               | $9.6 \times 10^{-2}$                    | 1.4                  | $3.0 \times 10^{-1}$                   | $9.9 \times 10^{-1}$ | N/A | $8.8 \times 10^{-1}$                   | $1.5 \times 10^2$      | $7.5 \times 10^{-1}$                   |
| D280G   | 1.3                  | $4.1 \times 10^{-1}$                   | $4.6 \times 10^5$                               | $5.1 \times 10^{-1}$                    | 1.1                  | $6.8 \times 10^{-1}$                   | N/A                  | 1.2 | $4.2 \times 10^{-2}$                   | $1.0 \times 10^2$      | $4.7 \times 10^{-1}$                   |
| D280V   | $4.8 \times 10^{-1}$ | <b><math>4.0 \times 10^{-3}</math></b> | $8.6 \times 10^5$                               | $1.4 \times 10^{-1}$                    | $6.3 \times 10^{-1}$ | $1.3 \times 10^{-1}$                   | $9.3 \times 10^{-1}$ | N/A | $1.1 \times 10^{-1}$                   | $1.6 \times 10^2$      | $7.4 \times 10^{-1}$                   |
| A281G   | 1.2                  | $5.2 \times 10^{-1}$                   | $1.9 \times 10^5$                               | $6.2 \times 10^{-2}$                    | 1.6                  | $1.9 \times 10^{-1}$                   | N/A                  | 1.0 | $4.8 \times 10^{-1}$                   | $1.7 \times 10^2$      | $6.5 \times 10^{-1}$                   |
| A281V   | $6.5 \times 10^{-1}$ | $1.3 \times 10^{-1}$                   | $3.2 \times 10^5$                               | $1.7 \times 10^{-1}$                    | 1.9                  | $5.9 \times 10^{-2}$                   | $9.9 \times 10^{-1}$ | N/A | $8.2 \times 10^{-1}$                   | $1.4 \times 10^2$      | $9.5 \times 10^{-1}$                   |
| A282G   |                      |                                        |                                                 |                                         |                      |                                        |                      |     |                                        |                        |                                        |

| Variant | $f_a$                     | $f_a$ $p$ -value                       | $(k_{cat}/K_M)_{chem}^{MEP}$ ( $M^{-1}s^{-1}$ ) | $(k_{cat}/K_M)_{chem}^{MEP}$ $p$ -value | FC1                  | FC1 $p$ -value                         | FC2                       | FC3 | FC2/3 $p$ -value                       | FC4 ( $s^{-1}$ )       | FC4 $p$ -value                         |
|---------|---------------------------|----------------------------------------|-------------------------------------------------|-----------------------------------------|----------------------|----------------------------------------|---------------------------|-----|----------------------------------------|------------------------|----------------------------------------|
| M288G   | $1.4 \times 10^{-1}$      | <b>0</b>                               | $1.6 \times 10^5$                               | <b><math>4.1 \times 10^{-2}</math></b>  | -                    | -                                      | $9.9 \times 10^{-1}$      | N/A | $4.9 \times 10^{-1}$                   | $1.0 \times 10^2$      | $4.6 \times 10^{-1}$                   |
| M288V   | -                         | -                                      | -                                               | -                                       | -                    | -                                      | $9.3 \times 10^{-1}$      | N/A | $3.4 \times 10^{-1}$                   | -                      | -                                      |
| G289A   | $8.0 \times 10^{-1}$      | $5.4 \times 10^{-1}$                   | $2.2 \times 10^5$                               | $1.2 \times 10^{-1}$                    | 2.5                  | <b><math>4.7 \times 10^{-3}</math></b> | $9.7 \times 10^{-1}$      | N/A | $4.7 \times 10^{-1}$                   | $8.9 \times 10^1$      | $3.4 \times 10^{-1}$                   |
| V290A   | 1.1                       | $5.3 \times 10^{-1}$                   | $4.9 \times 10^5$                               | $3.0 \times 10^{-1}$                    | 1.1                  | $6.7 \times 10^{-1}$                   | N/A                       | 1.1 | $7.5 \times 10^{-2}$                   | $1.5 \times 10^2$      | $8.8 \times 10^{-1}$                   |
| V290G   | 1.1                       | $7.4 \times 10^{-1}$                   | $1.5 \times 10^6$                               | <b><math>1.4 \times 10^{-2}</math></b>  | $3.1 \times 10^{-1}$ | <b><math>6.5 \times 10^{-4}</math></b> | N/A                       | 1.0 | $6.7 \times 10^{-1}$                   | $1.1 \times 10^2$      | $5.9 \times 10^{-1}$                   |
| D291G   | 1.3                       | $3.3 \times 10^{-1}$                   | $3.1 \times 10^5$                               | $3.1 \times 10^{-1}$                    | 1.9                  | $6.3 \times 10^{-2}$                   | $9.0 \times 10^{-1}$      | N/A | $2.6 \times 10^{-1}$                   | $1.2 \times 10^2$      | $6.6 \times 10^{-1}$                   |
| D291V   | 1.1                       | $7.3 \times 10^{-1}$                   | $6.0 \times 10^4$                               | <b><math>3.4 \times 10^{-2}</math></b>  | 4.5                  | <b><math>4.7 \times 10^{-3}</math></b> | $9.4 \times 10^{-1}$      | N/A | $3.4 \times 10^{-1}$                   | $1.4 \times 10^2$      | 1.0                                    |
| D292G   | 1.3                       | $2.1 \times 10^{-1}$                   | $6.1 \times 10^5$                               | $9.8 \times 10^{-1}$                    | $8.9 \times 10^{-1}$ | $7.2 \times 10^{-1}$                   | N/A                       | 1.0 | $7.3 \times 10^{-1}$                   | $1.2 \times 10^2$      | $5.8 \times 10^{-1}$                   |
| D292V   | $8.9 \times 10^{-1}$      | $6.8 \times 10^{-1}$                   | $3.5 \times 10^5$                               | $1.9 \times 10^{-1}$                    | -                    | -                                      | N/A                       | 1.1 | $2.1 \times 10^{-1}$                   | $1.3 \times 10^2$      | $9.2 \times 10^{-1}$                   |
| I293G   | 1.2                       | $5.2 \times 10^{-1}$                   | $3.8 \times 10^5$                               | $1.7 \times 10^{-1}$                    | 1.6                  | $1.1 \times 10^{-1}$                   | $9.9 \times 10^{-1}$      | N/A | $7.9 \times 10^{-1}$                   | $1.1 \times 10^2$      | $5.1 \times 10^{-1}$                   |
| I293V   | $6.3 \times 10^{-1}$      | $5.6 \times 10^{-2}$                   | $9.5 \times 10^5$                               | $7.3 \times 10^{-2}$                    | $6.1 \times 10^{-1}$ | $7.7 \times 10^{-2}$                   | N/A                       | 1.0 | $8.9 \times 10^{-1}$                   | $1.6 \times 10^2$      | $7.1 \times 10^{-1}$                   |
| T294G   | $4.6 \times 10^{-1}$      | $4.7 \times 10^{-2}$                   | $2.6 \times 10^5$                               | $2.1 \times 10^{-1}$                    | 2.0                  | $6.7 \times 10^{-2}$                   | $8.6 \times 10^{-1}$      | N/A | $2.4 \times 10^{-2}$                   | $9.3 \times 10^1$      | $5.3 \times 10^{-1}$                   |
| T294V   | 1.3                       | $2.4 \times 10^{-1}$                   | $2.9 \times 10^5$                               | $1.1 \times 10^{-1}$                    | 1.9                  | $5.5 \times 10^{-2}$                   | N/A                       | 1.1 | $2.9 \times 10^{-2}$                   | $1.6 \times 10^2$      | $5.8 \times 10^{-1}$                   |
| D295G   | $4.7 \times 10^{-1}$      | $2.2 \times 10^{-2}$                   | $3.6 \times 10^5$                               | $3.1 \times 10^{-1}$                    | 1.4                  | $3.4 \times 10^{-1}$                   | $8.0 \times 10^{-1}$      | N/A | <b><math>5.3 \times 10^{-3}</math></b> | $8.3 \times 10^1$      | $3.4 \times 10^{-1}$                   |
| D295V   | $1.2 \times 10^{-1}$      | <b>0</b>                               | $1.5 \times 10^5$                               | <b><math>3.3 \times 10^{-2}</math></b>  | -                    | -                                      | $8.1 \times 10^{-1}$      | N/A | <b><math>1. \times 10^{-4}</math></b>  | $1.1 \times 10^2$      | $5.0 \times 10^{-1}$                   |
| F296G   | $1.1 \times 10^{-1}$      | <b>0</b>                               | $1.6 \times 10^5$                               | <b><math>4.4 \times 10^{-2}</math></b>  | 3.1                  | $2.9 \times 10^{-2}$                   | $7.0 \times 10^{-1}$      | N/A | <b>0</b>                               | $1.0 \times 10^2$      | $4.2 \times 10^{-1}$                   |
| F296V   | $6.9 \times 10^{-1}$      | $2.1 \times 10^{-1}$                   | $6.3 \times 10^5$                               | $9.4 \times 10^{-1}$                    | -                    | -                                      | $7.8 \times 10^{-1}$      | N/A | <b><math>9.0 \times 10^{-4}</math></b> | $1.1 \times 10^2$      | $6.3 \times 10^{-1}$                   |
| L297G   | $\leq 5.4 \times 10^{-3}$ | <b>0</b>                               | $\leq 4.0 \times 10^5$                          | $2.9 \times 10^{-1}$                    | -                    | -                                      | $7.4 \times 10^{-1}$      | N/A | $2.8 \times 10^{-2}$                   | $\geq 8.5 \times 10^1$ | $3.8 \times 10^{-1}$                   |
| L297V   | 1.2                       | $4.9 \times 10^{-1}$                   | $3.0 \times 10^5$                               | $6.7 \times 10^{-2}$                    | 1.5                  | $2.1 \times 10^{-1}$                   | N/A                       | 1.0 | $7.2 \times 10^{-1}$                   | $1.8 \times 10^2$      | $4.4 \times 10^{-1}$                   |
| T298G   | $8.3 \times 10^{-1}$      | $4.0 \times 10^{-1}$                   | $3.9 \times 10^5$                               | $3.1 \times 10^{-1}$                    | 1.4                  | $3.0 \times 10^{-1}$                   | $8.0 \times 10^{-1}$      | N/A | <b><math>6.0 \times 10^{-4}</math></b> | $1.1 \times 10^2$      | $4.8 \times 10^{-1}$                   |
| T298V   | 1.8                       | $1.3 \times 10^{-2}$                   | $5.3 \times 10^5$                               | $6.7 \times 10^{-1}$                    | $7.3 \times 10^{-1}$ | $3.7 \times 10^{-1}$                   | $9.4 \times 10^{-1}$      | N/A | $2.8 \times 10^{-1}$                   | $1.2 \times 10^2$      | $6.5 \times 10^{-1}$                   |
| V299A   | $7.2 \times 10^{-1}$      | $2.2 \times 10^{-1}$                   | $1.4 \times 10^5$                               | $6.3 \times 10^{-2}$                    | 4.0                  | <b><math>6.0 \times 10^{-3}</math></b> | $8.2 \times 10^{-1}$      | N/A | $4.6 \times 10^{-2}$                   | $1.4 \times 10^2$      | $9.3 \times 10^{-1}$                   |
| V299G   | $9.7 \times 10^{-3}$      | <b>0</b>                               | $1.3 \times 10^6$                               | <b><math>4.5 \times 10^{-2}</math></b>  | -                    | -                                      | $6.3 \times 10^{-1}$      | N/A | <b>0</b>                               | $1.2 \times 10^2$      | $6.4 \times 10^{-1}$                   |
| N300G   | 2.5                       | <b><math>3.0 \times 10^{-3}</math></b> | $2.6 \times 10^5$                               | $1.5 \times 10^{-1}$                    | $3.9 \times 10^{-1}$ | $1.1 \times 10^{-2}$                   | $4.1 \times 10^{-1}$      | N/A | <b><math>2.0 \times 10^{-4}</math></b> | $6.4 \times 10^1$      | $1.3 \times 10^{-1}$                   |
| N300V   | $9.8 \times 10^{-2}$      | <b>0</b>                               | $2.8 \times 10^4$                               | <b><math>4.5 \times 10^{-2}</math></b>  | $1.9 \times 10^1$    | <b><math>4.0 \times 10^{-4}</math></b> | $8.3 \times 10^{-1}$      | N/A | <b><math>3.6 \times 10^{-3}</math></b> | $3.0 \times 10^1$      | $5.7 \times 10^{-2}$                   |
| L301G   | $1.1 \times 10^{-1}$      | <b>0</b>                               | $1.4 \times 10^5$                               | <b><math>2.8 \times 10^{-2}</math></b>  | -                    | -                                      | $9.8 \times 10^{-1}$      | N/A | $7.2 \times 10^{-1}$                   | $9.8 \times 10^1$      | $3.4 \times 10^{-1}$                   |
| L301V   | $4.3 \times 10^{-1}$      | $1.4 \times 10^{-2}$                   | $7.6 \times 10^5$                               | $5.1 \times 10^{-1}$                    | $6.4 \times 10^{-1}$ | $3.2 \times 10^{-1}$                   | N/A                       | 1.3 | <b><math>3.2 \times 10^{-3}</math></b> | $2.2 \times 10^2$      | $1.7 \times 10^{-1}$                   |
| A302G   | 1.2                       | $5.4 \times 10^{-1}$                   | $9.1 \times 10^4$                               | $6.9 \times 10^{-2}$                    | 3.9                  | $1.1 \times 10^{-2}$                   | N/A                       | 1.6 | <b><math>4.0 \times 10^{-4}</math></b> | $7.2 \times 10^1$      | $2.4 \times 10^{-1}$                   |
| A302V   | $2.2 \times 10^{-1}$      | <b>0</b>                               | $2.9 \times 10^4$                               | <b><math>2.9 \times 10^{-2}</math></b>  | $2.1 \times 10^2$    | <b>0</b>                               | N/A                       | 1.3 | <b>0</b>                               | $1.2 \times 10^2$      | $7.0 \times 10^{-1}$                   |
| S303G   | 1.2                       | $5.8 \times 10^{-1}$                   | $2.9 \times 10^5$                               | $1.1 \times 10^{-1}$                    | 1.7                  | $1.1 \times 10^{-1}$                   | N/A                       | 1.2 | $3.2 \times 10^{-2}$                   | $1.6 \times 10^2$      | $8.2 \times 10^{-1}$                   |
| S303V   | $6.4 \times 10^{-1}$      | $4.6 \times 10^{-2}$                   | $1.3 \times 10^5$                               | <b><math>3.4 \times 10^{-2}</math></b>  | 1.3                  | $3.4 \times 10^{-1}$                   | N/A                       | 1.1 | $8.2 \times 10^{-2}$                   | $8.9 \times 10^1$      | $2.1 \times 10^{-1}$                   |
| T304G   | $\leq 2.0$                | $1.3 \times 10^{-2}$                   | $\leq 1.6 \times 10^5$                          | $5.2 \times 10^{-2}$                    | $\leq 2.2$           | $1.1 \times 10^{-2}$                   | $7.0 \times 10^{-1}$      | N/A | <b><math>4.0 \times 10^{-4}</math></b> | $\geq 8.9 \times 10^1$ | $2.9 \times 10^{-1}$                   |
| T304V   | $8.4 \times 10^{-2}$      | <b>0</b>                               | $1.2 \times 10^6$                               | <b><math>2.3 \times 10^{-2}</math></b>  | -                    | -                                      | N/A                       | 1.2 | <b><math>1. \times 10^{-4}</math></b>  | $1.4 \times 10^2$      | 1.0                                    |
| D305G   | $\leq 7.3 \times 10^{-2}$ | <b>0</b>                               | $\leq 4.0 \times 10^4$                          | <b><math>2.2 \times 10^{-2}</math></b>  | -                    | -                                      | $\leq 3.3 \times 10^{-3}$ | N/A | <b><math>4.0 \times 10^{-4}</math></b> | -                      | -                                      |
| D305V   | -                         | -                                      | -                                               | -                                       | -                    | -                                      | -                         | -   | -                                      | -                      | -                                      |
| Y306G   | 4.1                       | <b>0</b>                               | $1.9 \times 10^4$                               | <b><math>1.2 \times 10^{-2}</math></b>  | $4.5 \times 10^1$    | <b>0</b>                               | $2.3 \times 10^{-1}$      | N/A | <b>0</b>                               | $1.2 \times 10^1$      | $5.5 \times 10^{-2}$                   |
| Y306V   | $6.2 \times 10^{-1}$      | $5.0 \times 10^{-2}$                   | $9.1 \times 10^4$                               | <b><math>8.0 \times 10^{-3}</math></b>  | $1.1 \times 10^1$    | <b>0</b>                               | $8.4 \times 10^{-1}$      | N/A | <b><math>6.6 \times 10^{-3}</math></b> | $1.1 \times 10^2$      | $4.7 \times 10^{-1}$                   |
| V307A   | 1.5                       | $5.4 \times 10^{-2}$                   | $1.8 \times 10^5$                               | <b><math>3.1 \times 10^{-2}</math></b>  | 2.1                  | $1.9 \times 10^{-2}$                   | N/A                       | 1.4 | <b><math>2.0 \times 10^{-4}</math></b> | $1.6 \times 10^2$      | $7.1 \times 10^{-1}$                   |
| V307G   | 1.4                       | $2.0 \times 10^{-1}$                   | $1.0 \times 10^5$                               | $6.4 \times 10^{-2}$                    | 2.4                  | $2.5 \times 10^{-2}$                   | N/A                       | 1.4 | <b><math>8.0 \times 10^{-4}</math></b> | $8.3 \times 10^1$      | $2.6 \times 10^{-1}$                   |
| G308A   | $4.5 \times 10^{-1}$      | <b><math>8.0 \times 10^{-3}</math></b> | $6.3 \times 10^5$                               | $9.2 \times 10^{-1}$                    | 1.7                  | $8.6 \times 10^{-2}$                   | $8.4 \times 10^{-1}$      | N/A | <b><math>1.2 \times 10^{-3}</math></b> | $1.2 \times 10^2$      | $7.3 \times 10^{-1}$                   |
| G308V   | $1.6 \times 10^{-1}$      | <b>0</b>                               | $4.5 \times 10^5$                               | $3.6 \times 10^{-1}$                    | -                    | -                                      | $7.7 \times 10^{-1}$      | N/A | <b>0</b>                               | $1.1 \times 10^2$      | $5.0 \times 10^{-1}$                   |
| H309G   | $2.2 \times 10^{-1}$      | <b>0</b>                               | $4.6 \times 10^5$                               | $4.9 \times 10^{-1}$                    | -                    | -                                      | N/A                       | 1.3 | <b>0</b>                               | $2.3 \times 10^2$      | $6.3 \times 10^{-2}$                   |
| H309V   | $\leq 3.7 \times 10^{-3}$ | <b>0</b>                               | $\leq 2.8 \times 10^5$                          | $7.1 \times 10^{-2}$                    | -                    | -                                      | N/A                       | 1.6 | <b>0</b>                               | $\geq 2.0 \times 10^3$ | <b>0</b>                               |
| N310G   | $9.1 \times 10^{-1}$      | $7.1 \times 10^{-1}$                   | $2.7 \times 10^5$                               | $1.1 \times 10^{-1}$                    | 2.6                  | <b><math>3.3 \times 10^{-3}</math></b> | $9.7 \times 10^{-1}$      | N/A | $5.0 \times 10^{-1}$                   | $1.2 \times 10^2$      | $7.6 \times 10^{-1}$                   |
| N310V   | $9.9 \times 10^{-1}$      | $8.9 \times 10^{-1}$                   | $4.4 \times 10^5$                               | $3.0 \times 10^{-1}$                    | $8.5 \times 10^{-1}$ | $6.7 \times 10^{-1}$                   | $7.7 \times 10^{-1}$      | N/A | <b><math>2.0 \times 10^{-4}</math></b> | $9.2 \times 10^1$      | $2.5 \times 10^{-1}$                   |
| F311G   | $3.7 \times 10^{-1}$      | <b><math>2.0 \times 10^{-3}</math></b> | $8.2 \times 10^5$                               | $2.9 \times 10^{-1}$                    | $6.8 \times 10^{-1}$ | $3.3 \times 10^{-1}$                   | $6.6 \times 10^{-1}$      | N/A | <b><math>1. \times 10^{-4}</math></b>  | $1.0 \times 10^2$      | $4.6 \times 10^{-1}$                   |
| F311V   | $5.6 \times 10^{-1}$      | $1.4 \times 10^{-2}$                   | $5.5 \times 10^5$                               | $7.7 \times 10^{-1}$                    | $8.2 \times 10^{-1}$ | $6.1 \times 10^{-1}$                   | $9.7 \times 10^{-1}$      | N/A | $3.8 \times 10^{-1}$                   | $1.4 \times 10^2$      | $9.9 \times 10^{-1}$                   |
| G312A   | $7.3 \times 10^{-1}$      | $2.0 \times 10^{-1}$                   | $4.1 \times 10^5$                               | $3.7 \times 10^{-1}$                    | 1.5                  | $1.8 \times 10^{-1}$                   | $9.1 \times 10^{-1}$      | N/A | $6.6 \times 10^{-2}$                   | $8.6 \times 10^1$      | $3.1 \times 10^{-1}$                   |
| G312V   | -                         | -                                      | -                                               | -                                       | -                    | -                                      | -                         | -   | -                                      | -                      | -                                      |
| P313G   | $7.2 \times 10^{-1}$      | $2.8 \times 10^{-1}$                   | $4.4 \times 10^5$                               | $5.1 \times 10^{-1}$                    | 1.8                  | $3.3 \times 10^{-2}$                   | $8.8 \times 10^{-1}$      | N/A | $2.3 \times 10^{-2}$                   | $7.1 \times 10^1$      | $1.8 \times 10^{-1}$                   |
| P313V   | 1.2                       | $4.2 \times 10^{-1}$                   | $6.0 \times 10^5$                               | $9.8 \times 10^{-1}$                    | $6.6 \times 10^{-1}$ | $1.9 \times 10^{-1}$                   | N/A                       | 1.1 | $4.2 \times 10^{-2}$                   | $1.7 \times 10^2$      | $5.8 \times 10^{-1}$                   |
| N314G   | $7.4 \times 10^{-1}$      | $1.5 \times 10^{-1}$                   | $3.8 \times 10^5$                               | $1.7 \times 10^{-1}$                    | 1.2                  | $6.1 \times 10^{-1}$                   | $6.6 \times 10^{-1}$      | N/A | <b><math>1. \times 10^{-4}</math></b>  | $6.6 \times 10^1$      | $1.3 \times 10^{-1}$                   |
| N314V   | 1.4                       | $1.9 \times 10^{-1}$                   | $9.3 \times 10^4$                               | <b><math>2.4 \times 10^{-2}</math></b>  | 7.1                  | <b>0</b>                               | $7.2 \times 10^{-1}$      | N/A | <b><math>2.0 \times 10^{-4}</math></b> | $8.2 \times 10^1$      | $1.8 \times 10^{-1}$                   |
| S315G   | $5.4 \times 10^{-1}$      | $2.2 \times 10^{-2}$                   | $3.2 \times 10^5$                               | $1.9 \times 10^{-1}$                    | 1.0                  | $8.8 \times 10^{-1}$                   | $7.5 \times 10^{-1}$      | N/A | <b>0</b>                               | $1.1 \times 10^2$      | $5.0 \times 10^{-1}$                   |
| S315V   | $3.0 \times 10^{-1}$      | <b><math>1.0 \times 10^{-3}</math></b> | $4.6 \times 10^4$                               | $9.4 \times 10^{-2}$                    | 7.9                  | $1.1 \times 10^{-2}$                   | $3.4 \times 10^{-1}$      | N/A | <b>0</b>                               | $6.0 \times 10^1$      | $1.5 \times 10^{-1}$                   |
| I316G   | $4.6 \times 10^{-1}$      | $1.2 \times 10^{-2}$                   | $3.3 \times 10^5$                               | $2.0 \times 10^{-1}$                    | -                    | -                                      | $6.1 \times 10^{-1}$      | N/A | <b><math>1. \times 10^{-4}</math></b>  | $9.1 \times 10^1$      | $3.4 \times 10^{-1}$                   |
| I316V   | 1.2                       | $4.6 \times 10^{-1}$                   | $4.1 \times 10^5$                               | $2.7 \times 10^{-1}$                    | $8.8 \times 10^{-1}$ | $7.4 \times 10^{-1}$                   | N/A                       | 1.1 | $2.1 \times 10^{-1}$                   | $1.5 \times 10^2$      | $9.0 \times 10^{-1}$                   |
| E317G   | $2.4 \times 10^{-1}$      | <b>0</b>                               | $8.6 \times 10^4$                               | <b><math>8.0 \times 10^{-3}</math></b>  | 3.9                  | <b><math>1.1 \times 10^{-3}</math></b> | $3.8 \times 10^{-1}$      | N/A | <b>0</b>                               | $4.6 \times 10^1$      | $6.2 \times 10^{-2}$                   |
| E317V   | $4.0 \times 10^{-1}$      | <b>0</b>                               | $4.5 \times 10^4$                               | <b><math>1.3 \times 10^{-2}</math></b>  | 6.0                  | <b><math>8.7 \times 10^{-4}</math></b> | $2.5 \times 10^{-1}$      | N/A | <b>0</b>                               | $3.0 \times 10^1$      | <b><math>2.2 \times 10^{-2}</math></b> |
| V318A   | 1.5                       | $1.1 \times 10^{-1}$                   | $1.3 \times 10^5$                               | <b><math>2.5 \times 10^{-2}</math></b>  | 2.9                  | <b><math>4.3 \times 10^{-3}</math></b> | N/A                       | 1.2 | $1.5 \times 10^{-2}$                   | $1.7 \times 10^2$      | $5.5 \times 10^{-1}$                   |
| V318G   | $8.6 \times 10^{-1}$      | $5.5 \times 10^{-1}$                   | $2.9 \times 10^5$                               | $1.3 \times 10^{-1}$                    | $8.5 \times 10^{-1}$ | $6.5 \times 10^{-1}$                   | $8.9 \times 10^{-1}$      | N/A | $3.6 \times 10^{-2}$                   | $1.1 \times 10^2$      | $5.5 \times 10^{-1}$                   |
| E319G   | $3.7 \times 10^{-1}$      | <b>0</b>                               | $3.6 \times 10^5$                               | $2.8 \times 10^{-1}$                    | 1.6                  | $1.7 \times 10^{-1}$                   | $7.8 \times 10^{-1}$      | N/A | <b><math>2.0 \times 10^{-4}</math></b> | $1.2 \times 10^2$      | $6.6 \times 10^{-1}$                   |
| E319V   | $4.7 \times 10^{-1}$      | <b><math>7.0 \times 10^{-3}</math></b> | $4.2 \times 10^5$                               | $3.7 \times 10^{-1}$                    | 1.6                  | $2.2 \times 10^{-1}$                   | $8.4 \times 10^{-1}$      | N/A | $2.0 \times 10^{-2}$                   | $1.4 \times 10^2$      | $9.8 \times 10^{-1}$                   |
| D320G   | $1.5 \times 10^{-1}$      | <b>0</b>                               | $1.9 \times 10^5$                               | <b><math>3.6 \times 10^{-2}</math></b>  | 2.2                  | $2.3 \times 10^{-2}$                   | $5.9 \times 10^{-1}$      | N/A | <b>0</b>                               | $7.7 \times 10^1$      | $1.1 \times 10^{-1}$                   |
| D320V   | $1.1 \times 10^{-1}$      | <b>0</b>                               | $5.5 \times 10^4$                               | <b><math>1.9 \times 10^{-2}</math></b>  | 7.7                  | <b><math>2.7 \times 10^{-3}</math></b> | $5.0 \times 10^{-1}$      | N/A | <b>0</b>                               | $6.0 \times 10^1$      | $1.3 \times 10^{-1}$                   |
| T321G   | 1.3                       | $3.1 \times 10^{-1}$                   | $2.0 \times 10^5$                               | $1.8 \times 10^{-1}$                    | 1.8                  | $6.5 \times 10^{-2}$                   | $6.5 \times 10^{-1}$      | N/A | $1.9 \times 10^{-2}$                   | $9.0 \times 10^$       |                                        |

| Variant | $f_a$                     | $f_a$ $p$ -value                       | $(k_{cat}/K_M)_{chem}^{MEP}$ ( $M^{-1}s^{-1}$ ) | $(k_{cat}/K_M)_{chem}^{MEP}$ $p$ -value | FC1                  | FC1 $p$ -value                         | FC2                  | FC3 | FC2/3 $p$ -value                       | FC4 ( $s^{-1}$ )       | FC4 $p$ -value                         |
|---------|---------------------------|----------------------------------------|-------------------------------------------------|-----------------------------------------|----------------------|----------------------------------------|----------------------|-----|----------------------------------------|------------------------|----------------------------------------|
| D326G   | $\leq 1.2 \times 10^{-2}$ | <b>0</b>                               | $\leq 1.7 \times 10^5$                          | <b><math>4.7 \times 10^{-2}</math></b>  | -                    | -                                      | $9.9 \times 10^{-1}$ | N/A | $6.6 \times 10^{-1}$                   | $\geq 1.0 \times 10^2$ | $4.1 \times 10^{-1}$                   |
| D326V   | -                         | -                                      | -                                               | -                                       | -                    | -                                      | -                    | -   | -                                      | -                      | -                                      |
| R327G   | 1.3                       | $3.3 \times 10^{-1}$                   | $1.7 \times 10^5$                               | $7.6 \times 10^{-2}$                    | 3.3                  | <b><math>6.0 \times 10^{-4}</math></b> | $9.4 \times 10^{-1}$ | N/A | $2.5 \times 10^{-1}$                   | $9.1 \times 10^1$      | $4.0 \times 10^{-1}$                   |
| R327V   | 1.5                       | $5.7 \times 10^{-2}$                   | $2.1 \times 10^5$                               | <b><math>4.6 \times 10^{-2}</math></b>  | 2.2                  | $1.8 \times 10^{-2}$                   | N/A                  | 1.1 | $1.8 \times 10^{-1}$                   | $1.8 \times 10^2$      | $3.4 \times 10^{-1}$                   |
| D328G   | $7.2 \times 10^{-1}$      | $1.4 \times 10^{-1}$                   | $2.2 \times 10^5$                               | $6.3 \times 10^{-2}$                    | 2.8                  | <b><math>2.9 \times 10^{-3}</math></b> | $9.7 \times 10^{-1}$ | N/A | $5.2 \times 10^{-1}$                   | $1.1 \times 10^2$      | $4.9 \times 10^{-1}$                   |
| D328V   | $4.5 \times 10^{-1}$      | <b><math>6.0 \times 10^{-3}</math></b> | $3.0 \times 10^5$                               | $1.8 \times 10^{-1}$                    | 2.8                  | <b><math>6.9 \times 10^{-3}</math></b> | N/A                  | 1.0 | $7.6 \times 10^{-1}$                   | $1.3 \times 10^2$      | $9.0 \times 10^{-1}$                   |
| L329G   | $\leq 2.0 \times 10^{-3}$ | <b>0</b>                               | $\leq 1.0 \times 10^6$                          | $1.3 \times 10^{-1}$                    | -                    | -                                      | -                    | -   | -                                      | -                      | -                                      |
| L329V   | 1.1                       | $5.2 \times 10^{-1}$                   | $3.2 \times 10^5$                               | $7.8 \times 10^{-2}$                    | 1.6                  | $1.3 \times 10^{-1}$                   | N/A                  | 1.0 | $5.8 \times 10^{-1}$                   | $1.3 \times 10^2$      | <b><math>8.8 \times 10^{-1}</math></b> |
| A330G   | 1.6                       | $6.3 \times 10^{-2}$                   | $2.6 \times 10^5$                               | $8.8 \times 10^{-2}$                    | 1.3                  | $3.2 \times 10^{-1}$                   | $8.9 \times 10^{-1}$ | N/A | $4.9 \times 10^{-2}$                   | $1.3 \times 10^2$      | $9.0 \times 10^{-1}$                   |
| A330V   | 1.2                       | $4.9 \times 10^{-1}$                   | $2.5 \times 10^5$                               | $7.5 \times 10^{-2}$                    | 1.5                  | $2.3 \times 10^{-1}$                   | N/A                  | 1.1 | $1.4 \times 10^{-1}$                   | $1.7 \times 10^2$      | $5.3 \times 10^{-1}$                   |
| D331G   | 1.1                       | $7.6 \times 10^{-1}$                   | $2.7 \times 10^5$                               | $1.4 \times 10^{-1}$                    | 2.3                  | <b><math>5.0 \times 10^{-3}</math></b> | $9.5 \times 10^{-1}$ | N/A | $6.0 \times 10^{-1}$                   | $1.2 \times 10^2$      | $7.0 \times 10^{-1}$                   |
| D331V   | $6.5 \times 10^{-1}$      | $6.7 \times 10^{-2}$                   | $8.2 \times 10^5$                               | $2.6 \times 10^{-1}$                    | $7.3 \times 10^{-1}$ | $2.7 \times 10^{-1}$                   | $9.8 \times 10^{-1}$ | N/A | $5.9 \times 10^{-1}$                   | $1.7 \times 10^2$      | $5.6 \times 10^{-1}$                   |
| F332G   | $\leq 5.3 \times 10^{-3}$ | <b>0</b>                               | $\leq 1.0 \times 10^6$                          | <b><math>4.6 \times 10^{-2}</math></b>  | -                    | -                                      | $9.3 \times 10^{-1}$ | N/A | $1.1 \times 10^{-1}$                   | $\geq 1.0 \times 10^2$ | $4.3 \times 10^{-1}$                   |
| F332V   | 1.1                       | $7.6 \times 10^{-1}$                   | $5.6 \times 10^4$                               | <b><math>2.4 \times 10^{-2}</math></b>  | 5.7                  | <b><math>1.1 \times 10^{-4}</math></b> | $9.0 \times 10^{-1}$ | N/A | $1.0 \times 10^{-1}$                   | $1.0 \times 10^2$      | $5.0 \times 10^{-1}$                   |
| F333G   | $\leq 4.7 \times 10^{-2}$ | <b>0</b>                               | $\leq 1.3 \times 10^5$                          | $5.7 \times 10^{-2}$                    | -                    | -                                      | $7.3 \times 10^{-1}$ | N/A | <b>0</b>                               | $\geq 1.2 \times 10^2$ | $7.1 \times 10^{-1}$                   |
| F333V   | 1.4                       | $2.1 \times 10^{-1}$                   | $7.1 \times 10^4$                               | <b><math>2.6 \times 10^{-2}</math></b>  | 3.9                  | <b><math>1.2 \times 10^{-3}</math></b> | N/A                  | 1.0 | $5.7 \times 10^{-1}$                   | $1.5 \times 10^2$      | $8.7 \times 10^{-1}$                   |
| N334G   | $8.6 \times 10^{-1}$      | $5.0 \times 10^{-1}$                   | $5.5 \times 10^5$                               | $7.2 \times 10^{-1}$                    | 1.4                  | $2.9 \times 10^{-1}$                   | $8.5 \times 10^{-1}$ | N/A | <b><math>7.3 \times 10^{-3}</math></b> | $1.4 \times 10^2$      | $9.3 \times 10^{-1}$                   |
| N334V   | $9.6 \times 10^{-1}$      | $8.2 \times 10^{-1}$                   | $8.7 \times 10^5$                               | $1.4 \times 10^{-1}$                    | $5.1 \times 10^{-1}$ | $2.2 \times 10^{-2}$                   | N/A                  | 1.0 | $6.2 \times 10^{-1}$                   | $1.7 \times 10^2$      | $5.0 \times 10^{-1}$                   |
| N335G   | 1.0                       | $8.9 \times 10^{-1}$                   | $5.9 \times 10^5$                               | $8.9 \times 10^{-1}$                    | 1.1                  | $6.3 \times 10^{-1}$                   | $9.9 \times 10^{-1}$ | N/A | $9.2 \times 10^{-1}$                   | $9.2 \times 10^1$      | $3.6 \times 10^{-1}$                   |
| N335V   | 1.5                       | $7.4 \times 10^{-2}$                   | $4.1 \times 10^5$                               | $2.3 \times 10^{-1}$                    | $9.9 \times 10^{-1}$ | $9.7 \times 10^{-1}$                   | N/A                  | 1.1 | $7.4 \times 10^{-2}$                   | $1.6 \times 10^2$      | $6.9 \times 10^{-1}$                   |
| L336G   | $\leq 3.2 \times 10^{-3}$ | <b>0</b>                               | $\leq 7.1 \times 10^5$                          | $6.4 \times 10^{-1}$                    | -                    | -                                      | N/A                  | 1.1 | $4.5 \times 10^{-1}$                   | $\geq 8.0 \times 10^1$ | $2.7 \times 10^{-1}$                   |
| L336V   | $5.5 \times 10^{-1}$      | $5.4 \times 10^{-2}$                   | $8.4 \times 10^5$                               | $2.4 \times 10^{-1}$                    | $8.8 \times 10^{-1}$ | $7.0 \times 10^{-1}$                   | $9.1 \times 10^{-1}$ | N/A | $1.4 \times 10^{-1}$                   | $2.2 \times 10^2$      | $1.6 \times 10^{-1}$                   |
| D337G   | $9.7 \times 10^{-2}$      | <b>0</b>                               | $2.4 \times 10^5$                               | <b><math>4.2 \times 10^{-2}</math></b>  | -                    | -                                      | $9.5 \times 10^{-1}$ | N/A | $2.0 \times 10^{-1}$                   | $1.2 \times 10^2$      | $7.2 \times 10^{-1}$                   |
| D337V   | $1.8 \times 10^{-1}$      | <b>0</b>                               | $5.4 \times 10^4$                               | $5.0 \times 10^{-2}$                    | -                    | -                                      | $7.3 \times 10^{-1}$ | N/A | <b><math>8.0 \times 10^{-4}</math></b> | $1.4 \times 10^2$      | $9.7 \times 10^{-1}$                   |
| K338G   | $9.3 \times 10^{-1}$      | $7.2 \times 10^{-1}$                   | $2.4 \times 10^5$                               | $9.1 \times 10^{-2}$                    | 2.6                  | $1.6 \times 10^{-2}$                   | $9.2 \times 10^{-1}$ | N/A | $9.0 \times 10^{-2}$                   | $9.6 \times 10^1$      | $3.1 \times 10^{-1}$                   |
| K338V   | 1.3                       | $3.3 \times 10^{-1}$                   | $2.8 \times 10^5$                               | $8.6 \times 10^{-2}$                    | 1.9                  | $4.3 \times 10^{-2}$                   | N/A                  | 1.1 | $2.6 \times 10^{-1}$                   | $2.0 \times 10^2$      | $2.4 \times 10^{-1}$                   |
| K339G   | $6.7 \times 10^{-1}$      | $2.6 \times 10^{-1}$                   | $3.3 \times 10^5$                               | $2.8 \times 10^{-1}$                    | 1.4                  | $2.5 \times 10^{-1}$                   | $8.2 \times 10^{-1}$ | N/A | <b><math>7.2 \times 10^{-3}</math></b> | $8.9 \times 10^1$      | $4.3 \times 10^{-1}$                   |
| K339V   | $7.8 \times 10^{-1}$      | $2.9 \times 10^{-1}$                   | $5.0 \times 10^5$                               | $5.3 \times 10^{-1}$                    | 1.0                  | $9.9 \times 10^{-1}$                   | $9.6 \times 10^{-1}$ | N/A | $3.9 \times 10^{-1}$                   | $1.4 \times 10^2$      | $9.5 \times 10^{-1}$                   |
| V340A   | 1.3                       | $3.4 \times 10^{-1}$                   | $8.5 \times 10^4$                               | <b><math>4.3 \times 10^{-2}</math></b>  | 5.2                  | <b><math>1.9 \times 10^{-3}</math></b> | $9.0 \times 10^{-1}$ | N/A | $1.3 \times 10^{-1}$                   | $1.5 \times 10^2$      | $8.0 \times 10^{-1}$                   |
| V340G   | $8.6 \times 10^{-2}$      | <b>0</b>                               | $2.5 \times 10^5$                               | $8.1 \times 10^{-2}$                    | -                    | -                                      | N/A                  | 1.2 | <b>0</b>                               | $1.4 \times 10^2$      | 1.0                                    |
| G341A   | $4.4 \times 10^{-1}$      | <b><math>3.0 \times 10^{-3}</math></b> | $5.5 \times 10^5$                               | $7.7 \times 10^{-1}$                    | $8.3 \times 10^{-1}$ | $6.0 \times 10^{-1}$                   | $9.4 \times 10^{-1}$ | N/A | $3.0 \times 10^{-1}$                   | $9.5 \times 10^1$      | $4.0 \times 10^{-1}$                   |
| G341V   | $7.4 \times 10^{-1}$      | $2.0 \times 10^{-1}$                   | $6.2 \times 10^4$                               | <b><math>8.0 \times 10^{-3}</math></b>  | 4.6                  | <b><math>7.4 \times 10^{-4}</math></b> | $9.9 \times 10^{-1}$ | N/A | $8.7 \times 10^{-1}$                   | $1.3 \times 10^2$      | $8.4 \times 10^{-1}$                   |
| K342G   | 1.0                       | $9.9 \times 10^{-1}$                   | $3.3 \times 10^5$                               | $1.9 \times 10^{-1}$                    | 1.5                  | $1.1 \times 10^{-1}$                   | $8.8 \times 10^{-1}$ | N/A | $1.1 \times 10^{-1}$                   | $8.8 \times 10^1$      | $3.7 \times 10^{-1}$                   |
| K342V   | 1.3                       | $1.2 \times 10^{-1}$                   | $3.6 \times 10^5$                               | $1.4 \times 10^{-1}$                    | 1.3                  | $3.4 \times 10^{-1}$                   | N/A                  | 1.1 | $1.9 \times 10^{-1}$                   | $1.5 \times 10^2$      | $8.8 \times 10^{-1}$                   |
| G343A   | 1.4                       | $3.1 \times 10^{-1}$                   | $6.2 \times 10^5$                               | $9.6 \times 10^{-1}$                    | $8.0 \times 10^{-1}$ | $5.9 \times 10^{-1}$                   | 1.0                  | N/A | $9.8 \times 10^{-1}$                   | $1.0 \times 10^2$      | $5.1 \times 10^{-1}$                   |
| G343V   | 1.4                       | $1.6 \times 10^{-1}$                   | $1.5 \times 10^5$                               | <b><math>3.1 \times 10^{-2}</math></b>  | 2.5                  | $1.3 \times 10^{-2}$                   | N/A                  | 1.0 | $6.8 \times 10^{-1}$                   | $1.6 \times 10^2$      | $7.1 \times 10^{-1}$                   |
| N344G   | $9.4 \times 10^{-1}$      | $7.6 \times 10^{-1}$                   | $3.4 \times 10^5$                               | $1.6 \times 10^{-1}$                    | 1.4                  | $2.0 \times 10^{-1}$                   | $8.2 \times 10^{-1}$ | N/A | $1.2 \times 10^{-2}$                   | $9.0 \times 10^1$      | $3.0 \times 10^{-1}$                   |
| N344V   | $2.4 \times 10^{-1}$      | <b>0</b>                               | $6.8 \times 10^5$                               | $7.3 \times 10^{-1}$                    | -                    | -                                      | $8.6 \times 10^{-1}$ | N/A | $2.0 \times 10^{-2}$                   | $1.3 \times 10^2$      | $9.2 \times 10^{-1}$                   |
| Y345G   | $6.2 \times 10^{-2}$      | <b>0</b>                               | $4.9 \times 10^5$                               | $5.7 \times 10^{-1}$                    | -                    | -                                      | $8.3 \times 10^{-1}$ | N/A | <b><math>8.0 \times 10^{-4}</math></b> | $1.0 \times 10^2$      | $4.7 \times 10^{-1}$                   |
| Y345V   | 1.0                       | $9.9 \times 10^{-1}$                   | $2.4 \times 10^5$                               | $6.4 \times 10^{-2}$                    | 2.0                  | $2.7 \times 10^{-2}$                   | N/A                  | 1.1 | $1.8 \times 10^{-1}$                   | $1.6 \times 10^2$      | $5.8 \times 10^{-1}$                   |
| L346G   | $3.3 \times 10^{-1}$      | <b>0</b>                               | $3.5 \times 10^5$                               | $3.0 \times 10^{-1}$                    | 1.6                  | $1.5 \times 10^{-1}$                   | $7.9 \times 10^{-1}$ | N/A | <b><math>2.6 \times 10^{-3}</math></b> | $1.2 \times 10^2$      | $6.5 \times 10^{-1}$                   |
| L346V   | 1.4                       | $1.7 \times 10^{-1}$                   | $3.8 \times 10^5$                               | $2.6 \times 10^{-1}$                    | 1.2                  | $6.5 \times 10^{-1}$                   | N/A                  | 1.0 | $4.0 \times 10^{-1}$                   | $1.5 \times 10^2$      | $7.4 \times 10^{-1}$                   |
| V347A   | 1.6                       | $6.7 \times 10^{-2}$                   | $4.2 \times 10^5$                               | $3.0 \times 10^{-1}$                    | $7.1 \times 10^{-1}$ | $3.3 \times 10^{-1}$                   | N/A                  | 1.0 | $6.0 \times 10^{-1}$                   | $1.5 \times 10^2$      | $8.5 \times 10^{-1}$                   |
| V347G   | $\leq 8.8 \times 10^{-1}$ | $6.4 \times 10^{-1}$                   | $\leq 9.7 \times 10^4$                          | <b><math>3.4 \times 10^{-2}</math></b>  | $\leq 2.3$           | $1.3 \times 10^{-2}$                   | $8.8 \times 10^{-1}$ | N/A | $2.8 \times 10^{-2}$                   | $\geq 1.2 \times 10^2$ | $6.3 \times 10^{-1}$                   |
| F348G   | $1.0 \times 10^{-1}$      | <b>0</b>                               | $2.8 \times 10^5$                               | $9.6 \times 10^{-2}$                    | -                    | -                                      | $9.5 \times 10^{-1}$ | N/A | $1.8 \times 10^{-1}$                   | $9.0 \times 10^1$      | $2.9 \times 10^{-1}$                   |
| F348V   | $4.8 \times 10^{-1}$      | <b><math>7.0 \times 10^{-3}</math></b> | $4.7 \times 10^5$                               | $4.1 \times 10^{-1}$                    | $6.5 \times 10^{-1}$ | $1.7 \times 10^{-1}$                   | N/A                  | 1.0 | $9.7 \times 10^{-1}$                   | $1.4 \times 10^2$      | $9.5 \times 10^{-1}$                   |
| L349G   | $8.0 \times 10^{-2}$      | <b>0</b>                               | $2.4 \times 10^5$                               | $6.3 \times 10^{-2}$                    | -                    | -                                      | N/A                  | 1.2 | <b><math>1. \times 10^{-4}</math></b>  | $1.3 \times 10^2$      | $8.2 \times 10^{-1}$                   |
| L349V   | $4.7 \times 10^{-1}$      | <b><math>3.0 \times 10^{-3}</math></b> | $5.6 \times 10^5$                               | $7.9 \times 10^{-1}$                    | -                    | -                                      | $8.7 \times 10^{-1}$ | N/A | <b><math>7.6 \times 10^{-3}</math></b> | $1.7 \times 10^2$      | $5.6 \times 10^{-1}$                   |
| S350G   | $3.6 \times 10^{-1}$      | <b><math>1.0 \times 10^{-3}</math></b> | $4.5 \times 10^5$                               | $4.4 \times 10^{-1}$                    | 1.5                  | $1.8 \times 10^{-1}$                   | N/A                  | 1.2 | <b><math>1. \times 10^{-4}</math></b>  | $1.3 \times 10^2$      | $8.8 \times 10^{-1}$                   |
| S350V   | $6.3 \times 10^{-1}$      | $2.5 \times 10^{-2}$                   | $2.5 \times 10^5$                               | $6.2 \times 10^{-2}$                    | $9.2 \times 10^{-1}$ | $7.9 \times 10^{-1}$                   | N/A                  | 1.3 | <b><math>9.0 \times 10^{-4}</math></b> | $1.6 \times 10^2$      | $6.5 \times 10^{-1}$                   |
| A351G   | $7.6 \times 10^{-1}$      | $3.3 \times 10^{-1}$                   | $2.1 \times 10^5$                               | $1.1 \times 10^{-1}$                    | -                    | -                                      | $6.6 \times 10^{-1}$ | N/A | <b><math>1. \times 10^{-4}</math></b>  | $1.5 \times 10^2$      | $9.2 \times 10^{-1}$                   |
| A351V   | $7.2 \times 10^{-1}$      | $1.3 \times 10^{-1}$                   | $6.4 \times 10^4$                               | <b><math>5.0 \times 10^{-3}</math></b>  | -                    | -                                      | $7.4 \times 10^{-1}$ | N/A | <b><math>1. \times 10^{-4}</math></b>  | $8.5 \times 10^1$      | $1.8 \times 10^{-1}$                   |
| D352G   | $8.7 \times 10^{-2}$      | <b>0</b>                               | $5.9 \times 10^6$                               | <b>0</b>                                | 1.6                  | $1.2 \times 10^{-1}$                   | $3.8 \times 10^{-2}$ | N/A | <b>0</b>                               | -                      | -                                      |
| D352V   | -                         | -                                      | -                                               | -                                       | -                    | -                                      | -                    | -   | -                                      | -                      | -                                      |
| H353G   | -                         | -                                      | -                                               | -                                       | -                    | -                                      | -                    | -   | -                                      | -                      | -                                      |
| H353V   | $6.6 \times 10^{-1}$      | $9.0 \times 10^{-2}$                   | $1.2 \times 10^5$                               | <b><math>3.1 \times 10^{-2}</math></b>  | 1.0                  | $9.0 \times 10^{-1}$                   | $8.1 \times 10^{-1}$ | N/A | <b><math>6.9 \times 10^{-3}</math></b> | $8.5 \times 10^1$      | $2.3 \times 10^{-1}$                   |
| G354A   | $2.4 \times 10^{-1}$      | <b>0</b>                               | $4.4 \times 10^5$                               | $5.0 \times 10^{-1}$                    | 4.7                  | <b><math>1.4 \times 10^{-3}</math></b> | $9.7 \times 10^{-1}$ | N/A | $4.6 \times 10^{-1}$                   | $7.4 \times 10^1$      | $2.2 \times 10^{-1}$                   |
| G354V   | -                         | -                                      | -                                               | -                                       | -                    | -                                      | -                    | -   | -                                      | -                      | -                                      |
| A355G   | 1.4                       | $2.4 \times 10^{-1}$                   | $3.3 \times 10^5$                               | $2.1 \times 10^{-1}$                    | 2.1                  | $1.3 \times 10^{-2}$                   | $9.4 \times 10^{-1}$ | N/A | $3.7 \times 10^{-1}$                   | $1.1 \times 10^2$      | $5.9 \times 10^{-1}$                   |
| A355V   | $3.0 \times 10^{-1}$      | <b>0</b>                               | $6.2 \times 10^5$                               | $9.6 \times 10^{-1}$                    | -                    | -                                      | $8.6 \times 10^{-1}$ | N/A | $1.5 \times 10^{-2}$                   | $1.6 \times 10^2$      | $6.8 \times 10^{-1}$                   |
| A356G   | 1.3                       | $4.1 \times 10^{-1}$                   | $4.1 \times 10^5$                               | $2.6 \times 10^{-1}$                    | 2.5                  | <b><math>2.3 \times 10^{-3}</math></b> | $7.7 \times 10^{-1}$ | N/A | <b>0</b>                               | $1.1 \times 10^2$      | $5.0 \times 10^{-1}$                   |
| A356V   | $7.4 \times 10^{-1}$      | $9.0 \times 10^{-2}$                   | $4.8 \times 10^5$                               | $3.6 \times 10^{-1}$                    | $9.5 \times 10^{-1}$ | $8.1 \times 10^{-1}$                   | $7.5 \times 10^{-1}$ | N/A | <b>0</b>                               | $1.1 \times 10^2$      | $3.6 \times 10^{-1}$                   |
| H357G   | 3.4                       | <b><math>3.0 \times 10^{-3}</math></b> | $6.3 \times 10^5$                               | $9.2 \times 10^{-1}$                    | $3.0 \times 10^{-1}$ | <b><math>7.0 \times 10^{-3}</math></b> | $5.1 \times 10^{-1}$ | N/A | <b><math>9.0 \times 10^{-4}</math></b> | $5.3 \times 10^1$      | $2.3 \times 10^{-1}$                   |
| H357V   | $5.7 \times 10^{-1}$      | $2.0 \times 10^{-2}$                   | $3.6 \times 10^5$                               | $1.9 \times 10^{-1}$                    | 1.5                  | $2.2 \times 10^{-1}$                   | $7.7 \times 10^{-1}$ | N/A | <b><math>1.9 \times 10^{-3}</math></b> | $6.7 \times 10^1$      | $1.4 \times 10^{-1}$                   |
| S358G   | $6.7 \times 10^{-1}$      | $1.0 \times 10^{-1}$                   | $5.1 \times 10^5$                               | $6.7 \times 10^{-1}$                    | 1.0                  | $9.9 \times 10^{-1}$                   | $7.5 \times 10^{-1}$ | N/A | <b>0</b>                               | $5.1 \times 10^1$      | $8.9 \times 10^{-2}$                   |
| S358V   | $4.8 \times 10^{-1}$      | $1.6 \times 10^{-2}$                   | $2.4 \times 10^5$                               | $1.2 \times 10^{-1}$                    | 1.9                  | $9.2 \times 10^{-2}$                   | $8.1 \times 10^{-1}$ | N/A | <b><math>5.7 \times 10^{-3}</math></b> | $1.2 \times 10^2$      | $6.6 \times 10^{-1}$                   |
| V359A   | $6.6 \times 10^{-1}$      | $6.7 \times 10^{-2}$                   | $2.4 \times 10^5$                               | $8.2 \times 10^{-2}$                    | 2.1                  | $3.9 \times 10^{-2}$                   | $9.2 \times 10^{-1}$ | N/A | $1.6 \times 10^{-1}$                   | $1.6 \times 10^2$      | $6.9 \times 10^{-1}$                   |
| V359G</ |                           |                                        |                                                 |                                         |                      |                                        |                      |     |                                        |                        |                                        |

| Variant | $f_a$                     | $f_a$ $p$ -value                       | $(k_{cat}/K_M)_{chem}^{MEP}$ ( $M^{-1}s^{-1}$ ) | $(k_{cat}/K_M)_{chem}^{MEP}$ $p$ -value | FC1                  | FC1 $p$ -value                         | FC2                  | FC3 | FC2/3 $p$ -value                       | FC4 ( $s^{-1}$ )       | FC4 $p$ -value                         |
|---------|---------------------------|----------------------------------------|-------------------------------------------------|-----------------------------------------|----------------------|----------------------------------------|----------------------|-----|----------------------------------------|------------------------|----------------------------------------|
| Q363V   | 1.5                       | $4.3 \times 10^{-2}$                   | $2.1 \times 10^5$                               | <b><math>3.5 \times 10^{-2}</math></b>  | 2.1                  | $2.7 \times 10^{-2}$                   | N/A                  | 1.0 | $4.0 \times 10^{-1}$                   | $1.2 \times 10^2$      | $7.0 \times 10^{-1}$                   |
| A364V   | 1.2                       | $4.7 \times 10^{-1}$                   | $1.8 \times 10^5$                               | <b><math>3.8 \times 10^{-2}</math></b>  | 2.7                  | <b><math>1.5 \times 10^{-3}</math></b> | N/A                  | 1.1 | $4.9 \times 10^{-2}$                   | $1.6 \times 10^2$      | $7.0 \times 10^{-1}$                   |
| H365G   | $3.8 \times 10^{-1}$      | <b>0</b>                               | $7.7 \times 10^5$                               | $4.3 \times 10^{-1}$                    | $7.2 \times 10^{-1}$ | $2.7 \times 10^{-1}$                   | $9.5 \times 10^{-1}$ | N/A | $3.1 \times 10^{-1}$                   | $1.1 \times 10^2$      | $5.9 \times 10^{-1}$                   |
| H365V   | $9.2 \times 10^{-1}$      | $7.6 \times 10^{-1}$                   | $2.3 \times 10^5$                               | $7.1 \times 10^{-2}$                    | 2.8                  | <b><math>5.1 \times 10^{-3}</math></b> | N/A                  | 1.0 | $2.5 \times 10^{-1}$                   | $1.5 \times 10^2$      | $7.9 \times 10^{-1}$                   |
| K366G   | $\leq 3.8 \times 10^{-1}$ | <b><math>4.0 \times 10^{-3}</math></b> | $\leq 6.0 \times 10^5$                          | $9.7 \times 10^{-1}$                    | $\leq 1.4$           | $3.3 \times 10^{-1}$                   | $8.1 \times 10^{-1}$ | N/A | <b><math>6.0 \times 10^{-4}</math></b> | $\geq 9.7 \times 10^1$ | $4.2 \times 10^{-1}$                   |
| K366V   | $4.3 \times 10^{-1}$      | <b><math>4.0 \times 10^{-3}</math></b> | $5.3 \times 10^4$                               | <b><math>2.0 \times 10^{-2}</math></b>  | 8.4                  | <b><math>1.8 \times 10^{-4}</math></b> | N/A                  | 1.0 | $3.2 \times 10^{-1}$                   | $1.6 \times 10^2$      | $7.4 \times 10^{-1}$                   |
| M367G   | $1.0 \times 10^{-1}$      | <b>0</b>                               | $3.6 \times 10^5$                               | $1.6 \times 10^{-1}$                    | 2.0                  | $6.1 \times 10^{-2}$                   | $5.8 \times 10^{-1}$ | N/A | <b>0</b>                               | $7.5 \times 10^1$      | $1.6 \times 10^{-1}$                   |
| M367V   | $4.8 \times 10^{-1}$      | <b><math>3.0 \times 10^{-3}</math></b> | $2.0 \times 10^5$                               | <b><math>4.2 \times 10^{-2}</math></b>  | 2.5                  | $1.2 \times 10^{-2}$                   | N/A                  | 1.1 | $4.0 \times 10^{-2}$                   | $1.5 \times 10^2$      | $7.8 \times 10^{-1}$                   |
| P368G   | $2.4 \times 10^{-1}$      | <b>0</b>                               | $2.2 \times 10^5$                               | $1.1 \times 10^{-1}$                    | 3.1                  | <b><math>4.2 \times 10^{-3}</math></b> | $8.1 \times 10^{-1}$ | N/A | <b><math>3.0 \times 10^{-4}</math></b> | $9.7 \times 10^1$      | $3.9 \times 10^{-1}$                   |
| P368V   | $8.4 \times 10^{-1}$      | $4.9 \times 10^{-1}$                   | $1.7 \times 10^5$                               | <b><math>3.7 \times 10^{-2}</math></b>  | 3.7                  | <b><math>2.8 \times 10^{-4}</math></b> | $9.4 \times 10^{-1}$ | N/A | $1.6 \times 10^{-1}$                   | $1.4 \times 10^2$      | $9.5 \times 10^{-1}$                   |
| T369G   | 1.7                       | $3.6 \times 10^{-2}$                   | $2.8 \times 10^5$                               | $1.0 \times 10^{-1}$                    | 1.1                  | $7.0 \times 10^{-1}$                   | $8.6 \times 10^{-1}$ | N/A | <b><math>8.9 \times 10^{-3}</math></b> | $1.2 \times 10^2$      | $7.1 \times 10^{-1}$                   |
| T369V   | 1.2                       | $5.4 \times 10^{-1}$                   | $3.2 \times 10^5$                               | $1.3 \times 10^{-1}$                    | 1.1                  | $8.6 \times 10^{-1}$                   | $9.0 \times 10^{-1}$ | N/A | $1.1 \times 10^{-1}$                   | $1.4 \times 10^2$      | $9.9 \times 10^{-1}$                   |
| G370A   | $3.0 \times 10^{-1}$      | <b>0</b>                               | $8.6 \times 10^5$                               | $2.2 \times 10^{-1}$                    | $6.6 \times 10^{-1}$ | $2.0 \times 10^{-1}$                   | $9.2 \times 10^{-1}$ | N/A | $8.1 \times 10^{-2}$                   | $1.1 \times 10^2$      | $4.8 \times 10^{-1}$                   |
| G370V   | $8.2 \times 10^{-2}$      | <b>0</b>                               | $6.3 \times 10^4$                               | <b><math>3.8 \times 10^{-2}</math></b>  | -                    | -                                      | -                    | -   | -                                      | -                      | -                                      |
| F371G   | $1.7 \times 10^{-1}$      | <b>0</b>                               | $1.5 \times 10^6$                               | <b><math>4.0 \times 10^{-3}</math></b>  | $3.9 \times 10^{-1}$ | <b><math>8.2 \times 10^{-3}</math></b> | $9.0 \times 10^{-1}$ | N/A | $5.3 \times 10^{-2}$                   | $2.1 \times 10^2$      | $1.6 \times 10^{-1}$                   |
| F371V   | $9.3 \times 10^{-1}$      | $6.2 \times 10^{-1}$                   | $6.1 \times 10^5$                               | $9.9 \times 10^{-1}$                    | $5.3 \times 10^{-1}$ | $6.1 \times 10^{-2}$                   | N/A                  | 1.0 | $9.4 \times 10^{-1}$                   | $3.2 \times 10^2$      | <b><math>7.0 \times 10^{-3}</math></b> |
| F372G   | $6.5 \times 10^{-1}$      | $5.9 \times 10^{-2}$                   | $8.0 \times 10^5$                               | $2.9 \times 10^{-1}$                    | 1.3                  | $4.5 \times 10^{-1}$                   | $9.6 \times 10^{-1}$ | N/A | $4.1 \times 10^{-1}$                   | $1.6 \times 10^2$      | $7.0 \times 10^{-1}$                   |
| F372V   | $9.8 \times 10^{-1}$      | $9.6 \times 10^{-1}$                   | $5.3 \times 10^5$                               | $6.1 \times 10^{-1}$                    | $7.9 \times 10^{-1}$ | $4.0 \times 10^{-1}$                   | N/A                  | 1.1 | $4.4 \times 10^{-2}$                   | $1.9 \times 10^2$      | $2.8 \times 10^{-1}$                   |
| V373A   | $8.5 \times 10^{-1}$      | $5.7 \times 10^{-1}$                   | $6.3 \times 10^5$                               | $9.1 \times 10^{-1}$                    | $5.2 \times 10^{-1}$ | $2.6 \times 10^{-2}$                   | N/A                  | 1.2 | <b><math>6.6 \times 10^{-3}</math></b> | $1.6 \times 10^2$      | $6.6 \times 10^{-1}$                   |
| V373G   | $7.1 \times 10^{-1}$      | $2.7 \times 10^{-1}$                   | $9.2 \times 10^5$                               | $2.0 \times 10^{-1}$                    | $7.3 \times 10^{-1}$ | $4.1 \times 10^{-1}$                   | $8.8 \times 10^{-1}$ | N/A | $3.4 \times 10^{-2}$                   | $9.5 \times 10^1$      | $4.7 \times 10^{-1}$                   |
| E374G   | 1.5                       | $9.2 \times 10^{-2}$                   | $3.1 \times 10^5$                               | $1.4 \times 10^{-1}$                    | 1.9                  | $2.9 \times 10^{-2}$                   | $8.2 \times 10^{-1}$ | N/A | <b><math>6.7 \times 10^{-3}</math></b> | $1.1 \times 10^2$      | $6.0 \times 10^{-1}$                   |
| E374V   | 1.5                       | $9.2 \times 10^{-2}$                   | $3.8 \times 10^5$                               | $2.3 \times 10^{-1}$                    | 1.6                  | $1.1 \times 10^{-1}$                   | $9.1 \times 10^{-1}$ | N/A | $1.1 \times 10^{-1}$                   | $1.7 \times 10^2$      | $5.2 \times 10^{-1}$                   |
| D375G   | $6.2 \times 10^{-1}$      | $5.3 \times 10^{-2}$                   | $3.6 \times 10^5$                               | $2.2 \times 10^{-1}$                    | 2.1                  | $2.0 \times 10^{-2}$                   | $7.9 \times 10^{-1}$ | N/A | <b><math>3.0 \times 10^{-4}</math></b> | $1.1 \times 10^2$      | $5.6 \times 10^{-1}$                   |
| D375V   | $7.6 \times 10^{-1}$      | $2.4 \times 10^{-1}$                   | $1.3 \times 10^5$                               | $5.1 \times 10^{-2}$                    | 3.8                  | <b><math>6.4 \times 10^{-3}</math></b> | 1.0                  | N/A | $8.7 \times 10^{-1}$                   | $1.5 \times 10^2$      | $7.8 \times 10^{-1}$                   |
| M376G   | $3.2 \times 10^{-1}$      | <b><math>4.0 \times 10^{-3}</math></b> | $9.0 \times 10^5$                               | $2.1 \times 10^{-1}$                    | 1.1                  | $6.7 \times 10^{-1}$                   | $9.3 \times 10^{-1}$ | N/A | $1.7 \times 10^{-1}$                   | $1.8 \times 10^2$      | $5.7 \times 10^{-1}$                   |
| M376V   | 1.1                       | $6.6 \times 10^{-1}$                   | $7.0 \times 10^5$                               | $6.0 \times 10^{-1}$                    | $6.0 \times 10^{-1}$ | $1.4 \times 10^{-1}$                   | N/A                  | 1.0 | $6.8 \times 10^{-1}$                   | $1.2 \times 10^2$      | $7.2 \times 10^{-1}$                   |
| K377G   | 1.3                       | $4.5 \times 10^{-1}$                   | $4.5 \times 10^5$                               | $4.5 \times 10^{-1}$                    | $9.3 \times 10^{-1}$ | $7.6 \times 10^{-1}$                   | $9.9 \times 10^{-1}$ | N/A | $7.8 \times 10^{-1}$                   | $1.3 \times 10^2$      | $9.2 \times 10^{-1}$                   |
| K377V   | $9.8 \times 10^{-1}$      | $8.4 \times 10^{-1}$                   | $6.2 \times 10^5$                               | $9.7 \times 10^{-1}$                    | $6.5 \times 10^{-1}$ | $2.7 \times 10^{-1}$                   | $9.3 \times 10^{-1}$ | N/A | $1.5 \times 10^{-1}$                   | $1.9 \times 10^2$      | $2.1 \times 10^{-1}$                   |
| K378G   | $9.5 \times 10^{-1}$      | $7.9 \times 10^{-1}$                   | $7.5 \times 10^5$                               | $4.6 \times 10^{-1}$                    | 1.3                  | $3.8 \times 10^{-1}$                   | $9.6 \times 10^{-1}$ | N/A | $3.5 \times 10^{-1}$                   | $1.1 \times 10^2$      | $4.3 \times 10^{-1}$                   |
| K378V   | 1.2                       | $5.2 \times 10^{-1}$                   | $2.6 \times 10^5$                               | $9.3 \times 10^{-2}$                    | 2.1                  | $3.2 \times 10^{-2}$                   | N/A                  | 1.1 | $2.5 \times 10^{-2}$                   | $2.3 \times 10^2$      | $1.0 \times 10^{-1}$                   |
| E379G   | 1.4                       | $2.3 \times 10^{-1}$                   | $3.0 \times 10^5$                               | $1.2 \times 10^{-1}$                    | 1.4                  | $1.5 \times 10^{-1}$                   | $9.1 \times 10^{-1}$ | N/A | $7.4 \times 10^{-2}$                   | $1.0 \times 10^2$      | $4.6 \times 10^{-1}$                   |
| E379V   | 1.5                       | $1.1 \times 10^{-1}$                   | $4.5 \times 10^5$                               | $4.5 \times 10^{-1}$                    | 1.3                  | $5.4 \times 10^{-1}$                   | N/A                  | 1.1 | $3.7 \times 10^{-1}$                   | $1.8 \times 10^2$      | $3.2 \times 10^{-1}$                   |
| M380G   | 1.0                       | $9.8 \times 10^{-1}$                   | $3.2 \times 10^5$                               | $6.2 \times 10^{-2}$                    | 1.4                  | $1.6 \times 10^{-1}$                   | $8.9 \times 10^{-1}$ | N/A | <b><math>3.3 \times 10^{-3}</math></b> | $1.3 \times 10^2$      | $8.3 \times 10^{-1}$                   |
| M380V   | $9.9 \times 10^{-1}$      | $9.4 \times 10^{-1}$                   | $3.7 \times 10^5$                               | $1.7 \times 10^{-1}$                    | 1.9                  | $6.0 \times 10^{-2}$                   | N/A                  | 1.0 | $5.8 \times 10^{-1}$                   | $1.7 \times 10^2$      | $5.4 \times 10^{-1}$                   |
| N381G   | $9.7 \times 10^{-1}$      | $8.4 \times 10^{-1}$                   | $5.7 \times 10^5$                               | $8.5 \times 10^{-1}$                    | $9.7 \times 10^{-1}$ | $9.5 \times 10^{-1}$                   | N/A                  | 1.0 | $4.5 \times 10^{-1}$                   | $8.3 \times 10^1$      | $2.5 \times 10^{-1}$                   |
| N381V   | $4.1 \times 10^{-1}$      | <b><math>3.0 \times 10^{-3}</math></b> | $4.2 \times 10^5$                               | $3.5 \times 10^{-1}$                    | 1.2                  | $5.9 \times 10^{-1}$                   | $8.9 \times 10^{-1}$ | N/A | $3.1 \times 10^{-2}$                   | $1.5 \times 10^2$      | $7.5 \times 10^{-1}$                   |
| A382G   | $9.5 \times 10^{-1}$      | $8.4 \times 10^{-1}$                   | $1.2 \times 10^6$                               | <b><math>3.8 \times 10^{-2}</math></b>  | $6.6 \times 10^{-1}$ | $1.3 \times 10^{-1}$                   | N/A                  | 1.0 | $7.0 \times 10^{-1}$                   | $1.3 \times 10^2$      | $8.4 \times 10^{-1}$                   |
| A382V   | 1.3                       | $1.9 \times 10^{-1}$                   | $4.2 \times 10^5$                               | $2.9 \times 10^{-1}$                    | 1.0                  | $9.1 \times 10^{-1}$                   | N/A                  | 1.1 | $3.8 \times 10^{-2}$                   | $1.8 \times 10^2$      | $3.5 \times 10^{-1}$                   |
| K383G   | $8.1 \times 10^{-1}$      | $4.4 \times 10^{-1}$                   | $6.9 \times 10^5$                               | $7.3 \times 10^{-1}$                    | $6.4 \times 10^{-1}$ | $1.1 \times 10^{-1}$                   | $8.5 \times 10^{-1}$ | N/A | $1.3 \times 10^{-2}$                   | $8.9 \times 10^1$      | $3.9 \times 10^{-1}$                   |
| K383V   | 1.1                       | $5.7 \times 10^{-1}$                   | $2.3 \times 10^5$                               | <b><math>4.6 \times 10^{-2}</math></b>  | 1.8                  | $2.9 \times 10^{-2}$                   | N/A                  | 1.1 | <b><math>7.0 \times 10^{-3}</math></b> | $1.7 \times 10^2$      | $4.2 \times 10^{-1}$                   |
| L384G   | $8.2 \times 10^{-1}$      | $4.9 \times 10^{-1}$                   | $2.6 \times 10^5$                               | $1.7 \times 10^{-1}$                    | 2.6                  | <b><math>2.9 \times 10^{-3}</math></b> | $8.0 \times 10^{-1}$ | N/A | <b><math>4.7 \times 10^{-3}</math></b> | $7.7 \times 10^1$      | $2.2 \times 10^{-1}$                   |
| L384V   | $8.8 \times 10^{-1}$      | $6.4 \times 10^{-1}$                   | $4.7 \times 10^5$                               | $5.5 \times 10^{-1}$                    | 1.2                  | $6.5 \times 10^{-1}$                   | N/A                  | 1.1 | $4.7 \times 10^{-1}$                   | $1.5 \times 10^2$      | $8.9 \times 10^{-1}$                   |
| K385G   | 1.1                       | $8.0 \times 10^{-1}$                   | $4.2 \times 10^5$                               | $2.9 \times 10^{-1}$                    | 1.0                  | $9.4 \times 10^{-1}$                   | N/A                  | 1.2 | <b><math>3.9 \times 10^{-3}</math></b> | $1.8 \times 10^2$      | $4.4 \times 10^{-1}$                   |
| K385V   | 1.5                       | $4.0 \times 10^{-2}$                   | $2.9 \times 10^5$                               | <b><math>4.2 \times 10^{-2}</math></b>  | 1.8                  | $7.4 \times 10^{-2}$                   | N/A                  | 1.2 | <b><math>1.7 \times 10^{-3}</math></b> | $1.4 \times 10^2$      | $9.4 \times 10^{-1}$                   |
| Q386G   | $8.1 \times 10^{-2}$      | <b>0</b>                               | $1.1 \times 10^6$                               | $8.8 \times 10^{-2}$                    | -                    | -                                      | $7.3 \times 10^{-1}$ | N/A | <b><math>3.0 \times 10^{-4}</math></b> | $1.1 \times 10^2$      | $6.4 \times 10^{-1}$                   |
| Q386V   | 1.5                       | $1.7 \times 10^{-1}$                   | $3.1 \times 10^5$                               | $2.8 \times 10^{-1}$                    | 1.8                  | $5.3 \times 10^{-2}$                   | N/A                  | 1.0 | $6.3 \times 10^{-1}$                   | $1.4 \times 10^2$      | $9.7 \times 10^{-1}$                   |
| K387G   | $5.9 \times 10^{-1}$      | $3.2 \times 10^{-2}$                   | $6.8 \times 10^5$                               | $7.1 \times 10^{-1}$                    | 1.2                  | $4.7 \times 10^{-1}$                   | $9.0 \times 10^{-1}$ | N/A | $6.6 \times 10^{-2}$                   | $1.3 \times 10^2$      | $8.3 \times 10^{-1}$                   |
| K387V   | 1.3                       | $2.4 \times 10^{-1}$                   | $3.2 \times 10^5$                               | $1.1 \times 10^{-1}$                    | 1.4                  | $2.3 \times 10^{-1}$                   | N/A                  | 1.1 | $2.4 \times 10^{-2}$                   | $2.2 \times 10^2$      | $7.5 \times 10^{-2}$                   |
| F388G   | $2.9 \times 10^{-1}$      | <b>0</b>                               | $5.2 \times 10^5$                               | $7.0 \times 10^{-1}$                    | -                    | -                                      | $9.6 \times 10^{-1}$ | N/A | $4.1 \times 10^{-1}$                   | $1.3 \times 10^2$      | $8.3 \times 10^{-1}$                   |
| F388V   | 1.2                       | $4.4 \times 10^{-1}$                   | $1.4 \times 10^5$                               | <b><math>4.0 \times 10^{-2}</math></b>  | 3.6                  | <b><math>1.0 \times 10^{-3}</math></b> | N/A                  | 1.1 | $1.7 \times 10^{-1}$                   | $1.5 \times 10^2$      | $8.9 \times 10^{-1}$                   |
| G389A   | 1.3                       | $3.4 \times 10^{-1}$                   | $6.4 \times 10^5$                               | $9.0 \times 10^{-1}$                    | $7.0 \times 10^{-1}$ | $1.9 \times 10^{-1}$                   | N/A                  | 1.0 | $6.3 \times 10^{-1}$                   | $1.1 \times 10^2$      | $5.3 \times 10^{-1}$                   |
| G389V   | $8.1 \times 10^{-1}$      | $3.5 \times 10^{-1}$                   | $4.1 \times 10^5$                               | $2.9 \times 10^{-1}$                    | 1.5                  | $2.7 \times 10^{-1}$                   | N/A                  | 1.1 | $2.5 \times 10^{-1}$                   | $1.4 \times 10^2$      | $9.6 \times 10^{-1}$                   |
| A390G   | 1.1                       | $7.7 \times 10^{-1}$                   | $5.1 \times 10^5$                               | $6.8 \times 10^{-1}$                    | 1.1                  | $7.0 \times 10^{-1}$                   | $9.5 \times 10^{-1}$ | N/A | $2.3 \times 10^{-1}$                   | $1.0 \times 10^2$      | $4.5 \times 10^{-1}$                   |
| A390V   | 1.5                       | $9.6 \times 10^{-2}$                   | $2.7 \times 10^5$                               | $9.2 \times 10^{-2}$                    | 2.0                  | $7.7 \times 10^{-2}$                   | N/A                  | 1.2 | $1.6 \times 10^{-2}$                   | $1.6 \times 10^2$      | $6.8 \times 10^{-1}$                   |
| D391G   | $8.6 \times 10^{-1}$      | $5.5 \times 10^{-1}$                   | $4.9 \times 10^5$                               | $5.6 \times 10^{-1}$                    | 1.1                  | $8.0 \times 10^{-1}$                   | $8.1 \times 10^{-1}$ | N/A | $3.0 \times 10^{-2}$                   | $1.5 \times 10^2$      | $9.3 \times 10^{-1}$                   |
| D391V   | $9.3 \times 10^{-1}$      | $7.3 \times 10^{-1}$                   | $2.7 \times 10^5$                               | $5.4 \times 10^{-2}$                    | 1.5                  | $1.6 \times 10^{-1}$                   | $9.9 \times 10^{-1}$ | N/A | $7.3 \times 10^{-1}$                   | $1.6 \times 10^2$      | $7.2 \times 10^{-1}$                   |
| N392G   | 1.0                       | $9.0 \times 10^{-1}$                   | $1.7 \times 10^6$                               | <b><math>4.0 \times 10^{-3}</math></b>  | $2.4 \times 10^{-1}$ | <b><math>2.2 \times 10^{-4}</math></b> | N/A                  | 1.1 | $1.6 \times 10^{-1}$                   | $1.0 \times 10^2$      | $4.7 \times 10^{-1}$                   |
| N392V   | $3.7 \times 10^{-1}$      | <b>0</b>                               | $7.3 \times 10^5$                               | $4.4 \times 10^{-1}$                    | 1.1                  | $8.5 \times 10^{-1}$                   | N/A                  | 1.0 | $4.5 \times 10^{-1}$                   | $1.4 \times 10^2$      | $9.4 \times 10^{-1}$                   |
| I393G   | 1.0                       | $8.4 \times 10^{-1}$                   | $3.1 \times 10^5$                               | $1.9 \times 10^{-1}$                    | 1.4                  | $2.7 \times 10^{-1}$                   | $8.9 \times 10^{-1}$ | N/A | $6.7 \times 10^{-2}$                   | $7.6 \times 10^1$      | $2.7 \times 10^{-1}$                   |
| I394G   | $\leq 2.4 \times 10^{-1}$ | <b>0</b>                               | $\leq 3.4 \times 10^5$                          | $2.3 \times 10^{-1}$                    | $\leq 4.7$           | <b><math>2.1 \times 10^{-3}</math></b> | $9.2 \times 10^{-1}$ | N/A | $1.6 \times 10^{-1}$                   | $\geq 1.5 \times 10^2$ | $8.0 \times 10^{-1}$                   |
| I394V   | 1.4                       | $8.1 \times 10^{-2}$                   | $3.2 \times 10^5$                               | $6.6 \times 10^{-2}$                    | 1.6                  | $1.0 \times 10^{-1}$                   | N/A                  | 1.1 | $7.5 \times 10^{-2}$                   | $1.5 \times 10^2$      | $8.1 \times 10^{-1}$                   |
| A395G   | 1.0                       | $9.8 \times 10^{-1}$                   | $9.5 \times 10^5$                               | $1.2 \times 10^{-1}$                    | $5.6 \times 10^{-1}$ | $1.4 \times 10^{-1}$                   | $9.4 \times 10^{-1}$ | N/A | $2.3 \times 10^{-1}$                   | $8.2 \times 10^1$      | $3.2 \times 10^{-1}$                   |
| A395V   | 1.9                       | <b><math>6.0 \times 10^{-3}</math></b> | $2.0 \times 10^5$                               | <b><math>4.3 \times 10^{-2}</math></b>  | 3.1                  | <b><math>2.0 \times 10^{-3}</math></b> | N/A                  | 1.1 | $2.5 \times 10^{-2}$                   | $1.4 \times 10^2$      | $9.4 \times 10^{-1}$                   |
| A396G   | $8.7 \times 10^{-1}$      | $7.1 \times 10^{-1}$                   |                                                 |                                         |                      |                                        |                      |     |                                        |                        |                                        |

| Variant | $f_a$                     | $f_a$ p-value                          | $(k_{cat}/K_M)_{chem}^{MEP}$ ( $M^{-1}s^{-1}$ ) | $(k_{cat}/K_M)_{chem}^{MEP}$ p-value   | FC1                  | FC1 p-value                            | FC2                  | FC3        | FC2/3 p-value                          | FC4 ( $s^{-1}$ )       | FC4 p-value          |
|---------|---------------------------|----------------------------------------|-------------------------------------------------|----------------------------------------|----------------------|----------------------------------------|----------------------|------------|----------------------------------------|------------------------|----------------------|
| V402A   | 1.6                       | $4.0 \times 10^{-2}$                   | $1.4 \times 10^5$                               | <b><math>2.5 \times 10^{-2}</math></b> | 2.4                  | <b><math>7.9 \times 10^{-3}</math></b> | N/A                  | 1.0        | $4.4 \times 10^{-1}$                   | $1.4 \times 10^2$      | $9.6 \times 10^{-1}$ |
| V402G   | $6.0 \times 10^{-1}$      | $3.5 \times 10^{-2}$                   | $2.8 \times 10^5$                               | $1.1 \times 10^{-1}$                   | 2.0                  | $2.5 \times 10^{-2}$                   | $8.9 \times 10^{-1}$ | N/A        | $1.3 \times 10^{-2}$                   | $9.3 \times 10^1$      | $3.4 \times 10^{-1}$ |
| Y403G   | $3.0 \times 10^{-1}$      | <b><math>1.0 \times 10^{-3}</math></b> | $7.9 \times 10^5$                               | $4.3 \times 10^{-1}$                   | -                    | -                                      | $7.0 \times 10^{-1}$ | N/A        | <b><math>1. \times 10^{-4}</math></b>  | $5.1 \times 10^1$      | $1.5 \times 10^{-1}$ |
| Y403V   | $9.5 \times 10^{-1}$      | $8.2 \times 10^{-1}$                   | $1.7 \times 10^5$                               | <b><math>3.0 \times 10^{-2}</math></b> | 2.6                  | <b><math>4.5 \times 10^{-3}</math></b> | N/A                  | 1.1        | $1.4 \times 10^{-1}$                   | $1.2 \times 10^2$      | $7.2 \times 10^{-1}$ |
| F404G   | $5.1 \times 10^{-1}$      | $3.2 \times 10^{-2}$                   | $2.1 \times 10^5$                               | $1.0 \times 10^{-1}$                   | 1.4                  | $3.2 \times 10^{-1}$                   | $8.6 \times 10^{-1}$ | N/A        | $8.2 \times 10^{-2}$                   | $1.2 \times 10^2$      | $8.0 \times 10^{-1}$ |
| F404V   | 1.6                       | $3.6 \times 10^{-2}$                   | $1.5 \times 10^5$                               | <b><math>3.4 \times 10^{-2}</math></b> | 3.0                  | <b><math>2.2 \times 10^{-3}</math></b> | N/A                  | 1.2        | $1.4 \times 10^{-2}$                   | $1.3 \times 10^2$      | $8.6 \times 10^{-1}$ |
| D405G   | $5.7 \times 10^{-1}$      | $8.7 \times 10^{-2}$                   | $1.6 \times 10^5$                               | $1.1 \times 10^{-1}$                   | 3.8                  | <b><math>5.4 \times 10^{-3}</math></b> | $7.8 \times 10^{-1}$ | N/A        | <b><math>2.8 \times 10^{-3}</math></b> | $9.1 \times 10^1$      | $4.3 \times 10^{-1}$ |
| D405V   | $8.7 \times 10^{-1}$      | $5.6 \times 10^{-1}$                   | $1.7 \times 10^4$                               | <b><math>8.0 \times 10^{-3}</math></b> | $1.2 \times 10^1$    | <b><math>3.0 \times 10^{-4}</math></b> | N/A                  | 1.0        | $6.0 \times 10^{-1}$                   | $1.3 \times 10^2$      | $7.9 \times 10^{-1}$ |
| R406G   | $9.7 \times 10^{-1}$      | $8.7 \times 10^{-1}$                   | $2.8 \times 10^5$                               | $2.3 \times 10^{-1}$                   | 2.0                  | $6.3 \times 10^{-2}$                   | N/A                  | 1.2        | $2.2 \times 10^{-2}$                   | $1.5 \times 10^2$      | $8.9 \times 10^{-1}$ |
| R406V   | 1.5                       | $9.4 \times 10^{-2}$                   | $2.8 \times 10^5$                               | $6.9 \times 10^{-2}$                   | 1.6                  | $9.3 \times 10^{-2}$                   | N/A                  | 1.2        | $2.2 \times 10^{-2}$                   | $2.1 \times 10^2$      | $1.2 \times 10^{-1}$ |
| K407G   | 1.1                       | $6.3 \times 10^{-1}$                   | $7.5 \times 10^5$                               | $5.2 \times 10^{-1}$                   | $8.5 \times 10^{-1}$ | $6.6 \times 10^{-1}$                   | $9.4 \times 10^{-1}$ | N/A        | $1.9 \times 10^{-1}$                   | $1.3 \times 10^2$      | $8.7 \times 10^{-1}$ |
| K407V   | 1.3                       | $2.0 \times 10^{-1}$                   | $3.3 \times 10^5$                               | $9.8 \times 10^{-2}$                   | 1.2                  | $4.9 \times 10^{-1}$                   | N/A                  | 1.1        | $5.6 \times 10^{-2}$                   | $1.6 \times 10^2$      | $5.8 \times 10^{-1}$ |
| V408A   | 1.5                       | $1.2 \times 10^{-1}$                   | $5.9 \times 10^5$                               | $9.2 \times 10^{-1}$                   | $9.5 \times 10^{-1}$ | $8.6 \times 10^{-1}$                   | N/A                  | 1.1        | $1.1 \times 10^{-1}$                   | $1.7 \times 10^2$      | $5.6 \times 10^{-1}$ |
| V408G   | $9.8 \times 10^{-1}$      | $8.6 \times 10^{-1}$                   | $2.0 \times 10^5$                               | $7.9 \times 10^{-2}$                   | 2.6                  | $1.9 \times 10^{-2}$                   | N/A                  | 1.1        | $8.7 \times 10^{-2}$                   | $1.1 \times 10^2$      | $4.4 \times 10^{-1}$ |
| L409G   | $2.8 \times 10^{-1}$      | <b>0</b>                               | $3.3 \times 10^5$                               | $1.7 \times 10^{-1}$                   | 2.1                  | $1.3 \times 10^{-2}$                   | $9.6 \times 10^{-1}$ | N/A        | $4.2 \times 10^{-1}$                   | $9.9 \times 10^1$      | $3.6 \times 10^{-1}$ |
| L409V   | $9.3 \times 10^{-1}$      | $7.4 \times 10^{-1}$                   | $1.4 \times 10^5$                               | $5.6 \times 10^{-2}$                   | 2.7                  | $2.0 \times 10^{-2}$                   | N/A                  | 1.2        | $1.2 \times 10^{-2}$                   | $1.6 \times 10^2$      | $7.3 \times 10^{-1}$ |
| A410G   | 1.3                       | $4.0 \times 10^{-1}$                   | $6.5 \times 10^5$                               | $8.6 \times 10^{-1}$                   | $7.4 \times 10^{-1}$ | $2.3 \times 10^{-1}$                   | $9.8 \times 10^{-1}$ | N/A        | $6.4 \times 10^{-1}$                   | $1.2 \times 10^2$      | $6.9 \times 10^{-1}$ |
| A410V   | 1.2                       | $4.4 \times 10^{-1}$                   | $3.0 \times 10^5$                               | $1.2 \times 10^{-1}$                   | 1.4                  | $2.4 \times 10^{-1}$                   | N/A                  | 1.1        | $2.7 \times 10^{-1}$                   | $1.3 \times 10^2$      | $7.9 \times 10^{-1}$ |
| D411G   | 1.0                       | $9.4 \times 10^{-1}$                   | $4.2 \times 10^5$                               | $3.5 \times 10^{-1}$                   | 1.2                  | $5.0 \times 10^{-1}$                   | N/A                  | 1.1        | $2.5 \times 10^{-1}$                   | $1.4 \times 10^2$      | $9.9 \times 10^{-1}$ |
| D411V   | 1.2                       | $1.9 \times 10^{-1}$                   | $2.7 \times 10^5$                               | <b><math>4.0 \times 10^{-3}</math></b> | 1.5                  | $1.1 \times 10^{-1}$                   | N/A                  | <b>1.0</b> | $2.4 \times 10^{-1}$                   | $1.6 \times 10^2$      | $5.9 \times 10^{-1}$ |
| S412G   | $9.4 \times 10^{-1}$      | $8.1 \times 10^{-1}$                   | $3.2 \times 10^5$                               | $1.4 \times 10^{-1}$                   | 1.6                  | $1.2 \times 10^{-1}$                   | $9.5 \times 10^{-1}$ | N/A        | $2.4 \times 10^{-1}$                   | $1.1 \times 10^2$      | $5.3 \times 10^{-1}$ |
| S412V   | 1.3                       | $1.7 \times 10^{-1}$                   | $4.1 \times 10^5$                               | $2.2 \times 10^{-1}$                   | 1.2                  | $5.0 \times 10^{-1}$                   | N/A                  | 1.1        | $6.9 \times 10^{-2}$                   | $2.1 \times 10^2$      | $9.8 \times 10^{-2}$ |
| K413G   | 1.1                       | $5.7 \times 10^{-1}$                   | $3.5 \times 10^5$                               | $2.3 \times 10^{-1}$                   | 2.3                  | $1.8 \times 10^{-2}$                   | $9.4 \times 10^{-1}$ | N/A        | $1.4 \times 10^{-1}$                   | $1.2 \times 10^2$      | $7.0 \times 10^{-1}$ |
| K413V   | 1.5                       | $7.2 \times 10^{-2}$                   | $2.0 \times 10^5$                               | <b><math>4.0 \times 10^{-2}</math></b> | 1.9                  | $2.7 \times 10^{-2}$                   | N/A                  | 1.1        | $2.1 \times 10^{-1}$                   | $1.6 \times 10^2$      | $7.3 \times 10^{-1}$ |
| L414G   | $3.8 \times 10^{-1}$      | <b><math>3.0 \times 10^{-3}</math></b> | $2.4 \times 10^5$                               | $1.1 \times 10^{-1}$                   | 2.7                  | <b><math>5.8 \times 10^{-3}</math></b> | $9.8 \times 10^{-1}$ | N/A        | $5.3 \times 10^{-1}$                   | $9.8 \times 10^1$      | $4.2 \times 10^{-1}$ |
| L414V   | $6.5 \times 10^{-1}$      | $8.8 \times 10^{-2}$                   | $4.2 \times 10^5$                               | $3.0 \times 10^{-1}$                   | 1.6                  | $9.3 \times 10^{-2}$                   | N/A                  | 1.0        | $5.5 \times 10^{-1}$                   | $1.7 \times 10^2$      | $5.5 \times 10^{-1}$ |
| E415G   | $4.9 \times 10^{-1}$      | $1.3 \times 10^{-2}$                   | $4.1 \times 10^5$                               | $3.2 \times 10^{-1}$                   | 3.2                  | <b><math>8.7 \times 10^{-4}</math></b> | $9.6 \times 10^{-1}$ | N/A        | $3.6 \times 10^{-1}$                   | $2.1 \times 10^2$      | $2.2 \times 10^{-1}$ |
| E415V   | $9.2 \times 10^{-1}$      | $7.5 \times 10^{-1}$                   | $6.7 \times 10^5$                               | $7.3 \times 10^{-1}$                   | $6.0 \times 10^{-1}$ | $9.5 \times 10^{-2}$                   | N/A                  | 1.0        | $5.8 \times 10^{-1}$                   | $1.5 \times 10^2$      | $7.6 \times 10^{-1}$ |
| L416G   | $2.7 \times 10^{-1}$      | <b><math>1.0 \times 10^{-3}</math></b> | $2.1 \times 10^6$                               | <b><math>9.0 \times 10^{-3}</math></b> | -                    | -                                      | N/A                  | 1.1        | $1.8 \times 10^{-1}$                   | $1.3 \times 10^2$      | $9.1 \times 10^{-1}$ |
| L416V   | $3.6 \times 10^{-1}$      | <b><math>1.0 \times 10^{-3}</math></b> | $2.8 \times 10^5$                               | $7.7 \times 10^{-2}$                   | 2.8                  | <b><math>3.5 \times 10^{-3}</math></b> | N/A                  | 1.1        | $1.1 \times 10^{-1}$                   | $1.6 \times 10^2$      | $7.0 \times 10^{-1}$ |
| D417G   | $8.1 \times 10^{-1}$      | $3.8 \times 10^{-1}$                   | $3.9 \times 10^5$                               | $2.7 \times 10^{-1}$                   | 1.5                  | $1.6 \times 10^{-1}$                   | N/A                  | 1.0        | $5.8 \times 10^{-1}$                   | $9.9 \times 10^1$      | $4.3 \times 10^{-1}$ |
| D417V   | $8.8 \times 10^{-1}$      | $6.0 \times 10^{-1}$                   | $2.8 \times 10^5$                               | $8.7 \times 10^{-2}$                   | 1.7                  | $1.2 \times 10^{-1}$                   | N/A                  | 1.2        | $2.1 \times 10^{-2}$                   | $1.6 \times 10^2$      | $6.3 \times 10^{-1}$ |
| D418G   | $9.2 \times 10^{-1}$      | $7.0 \times 10^{-1}$                   | $2.8 \times 10^5$                               | $1.5 \times 10^{-1}$                   | 2.5                  | <b><math>3.9 \times 10^{-3}</math></b> | N/A                  | 1.1        | $1.6 \times 10^{-1}$                   | $1.1 \times 10^2$      | $6.5 \times 10^{-1}$ |
| D418V   | 1.6                       | $8.9 \times 10^{-2}$                   | $2.0 \times 10^5$                               | $5.9 \times 10^{-2}$                   | 2.7                  | <b><math>3.9 \times 10^{-3}</math></b> | N/A                  | 1.1        | $1.2 \times 10^{-1}$                   | $1.6 \times 10^2$      | $7.6 \times 10^{-1}$ |
| V419A   | 1.1                       | $7.5 \times 10^{-1}$                   | $3.1 \times 10^5$                               | $1.1 \times 10^{-1}$                   | 1.6                  | $1.3 \times 10^{-1}$                   | N/A                  | 1.1        | $1.6 \times 10^{-1}$                   | $1.5 \times 10^2$      | $8.2 \times 10^{-1}$ |
| V419G   | $3.7 \times 10^{-1}$      | <b><math>4.0 \times 10^{-3}</math></b> | $2.0 \times 10^5$                               | $1.0 \times 10^{-1}$                   | 3.3                  | <b><math>2.7 \times 10^{-3}</math></b> | $7.9 \times 10^{-1}$ | N/A        | <b><math>8.5 \times 10^{-3}</math></b> | $8.3 \times 10^1$      | $3.3 \times 10^{-1}$ |
| R420G   | $3.3 \times 10^{-1}$      | <b>0</b>                               | $3.0 \times 10^5$                               | $1.9 \times 10^{-1}$                   | 1.9                  | $5.8 \times 10^{-2}$                   | $9.7 \times 10^{-1}$ | N/A        | $4.1 \times 10^{-1}$                   | $9.1 \times 10^1$      | $3.2 \times 10^{-1}$ |
| R420V   | $6.5 \times 10^{-1}$      | $4.4 \times 10^{-2}$                   | $3.4 \times 10^5$                               | $1.5 \times 10^{-1}$                   | -                    | -                                      | N/A                  | 1.2        | <b><math>1.0 \times 10^{-3}</math></b> | $1.6 \times 10^2$      | $6.1 \times 10^{-1}$ |
| D421G   | $9.6 \times 10^{-1}$      | $8.5 \times 10^{-1}$                   | $3.4 \times 10^5$                               | $2.5 \times 10^{-1}$                   | 1.8                  | $5.5 \times 10^{-2}$                   | N/A                  | 1.0        | $7.9 \times 10^{-1}$                   | $1.5 \times 10^2$      | $8.7 \times 10^{-1}$ |
| D421V   | $6.8 \times 10^{-1}$      | $1.1 \times 10^{-1}$                   | $3.1 \times 10^5$                               | $1.2 \times 10^{-1}$                   | 1.6                  | $1.4 \times 10^{-1}$                   | $9.7 \times 10^{-1}$ | N/A        | $5.1 \times 10^{-1}$                   | $1.4 \times 10^2$      | $9.1 \times 10^{-1}$ |
| Y422G   | $6.2 \times 10^{-1}$      | $6.9 \times 10^{-2}$                   | $2.0 \times 10^5$                               | $8.7 \times 10^{-2}$                   | 3.1                  | <b><math>2.1 \times 10^{-3}</math></b> | $9.7 \times 10^{-1}$ | N/A        | $3.3 \times 10^{-1}$                   | $7.0 \times 10^1$      | $2.0 \times 10^{-1}$ |
| Y422V   | 1.1                       | $7.1 \times 10^{-1}$                   | $4.5 \times 10^5$                               | $4.6 \times 10^{-1}$                   | 1.4                  | $2.7 \times 10^{-1}$                   | N/A                  | 1.1        | $3.8 \times 10^{-1}$                   | $1.7 \times 10^2$      | $5.8 \times 10^{-1}$ |
| V423A   | 1.1                       | $5.9 \times 10^{-1}$                   | $3.4 \times 10^5$                               | $1.2 \times 10^{-1}$                   | 1.3                  | $4.9 \times 10^{-1}$                   | N/A                  | 1.0        | $4.6 \times 10^{-1}$                   | $1.4 \times 10^2$      | $9.9 \times 10^{-1}$ |
| V423G   | $4.5 \times 10^{-1}$      | <b><math>2.0 \times 10^{-3}</math></b> | $3.3 \times 10^5$                               | $1.9 \times 10^{-1}$                   | 2.3                  | $2.4 \times 10^{-2}$                   | $9.3 \times 10^{-1}$ | N/A        | $1.9 \times 10^{-1}$                   | $1.0 \times 10^2$      | $5.1 \times 10^{-1}$ |
| M424G   | $3.1 \times 10^{-1}$      | <b>0</b>                               | $8.2 \times 10^5$                               | $3.0 \times 10^{-1}$                   | $8.5 \times 10^{-1}$ | $6.4 \times 10^{-1}$                   | $7.3 \times 10^{-1}$ | N/A        | <b><math>2.0 \times 10^{-4}</math></b> | $8.6 \times 10^1$      | $3.2 \times 10^{-1}$ |
| M424V   | $8.1 \times 10^{-1}$      | $4.1 \times 10^{-1}$                   | $9.7 \times 10^5$                               | $5.9 \times 10^{-2}$                   | $5.9 \times 10^{-1}$ | $9.7 \times 10^{-2}$                   | $9.8 \times 10^{-1}$ | N/A        | $5.5 \times 10^{-1}$                   | $1.7 \times 10^2$      | $5.4 \times 10^{-1}$ |
| T425V   | $9.2 \times 10^{-1}$      | $7.4 \times 10^{-1}$                   | $5.9 \times 10^5$                               | $9.0 \times 10^{-1}$                   | $8.2 \times 10^{-1}$ | $5.9 \times 10^{-1}$                   | N/A                  | 1.0        | $5.4 \times 10^{-1}$                   | $2.0 \times 10^2$      | $2.3 \times 10^{-1}$ |
| E426G   | $8.9 \times 10^{-1}$      | $6.3 \times 10^{-1}$                   | $2.4 \times 10^5$                               | $8.8 \times 10^{-2}$                   | 1.5                  | $3.1 \times 10^{-1}$                   | $8.7 \times 10^{-1}$ | N/A        | <b><math>6.2 \times 10^{-3}</math></b> | $1.3 \times 10^2$      | $7.6 \times 10^{-1}$ |
| E426V   | 1.3                       | $2.9 \times 10^{-1}$                   | $2.3 \times 10^5$                               | $5.3 \times 10^{-2}$                   | 1.6                  | $1.8 \times 10^{-1}$                   | N/A                  | 1.1        | $3.2 \times 10^{-1}$                   | $1.5 \times 10^2$      | $8.8 \times 10^{-1}$ |
| L427G   | $\leq 1.7 \times 10^{-1}$ | <b>0</b>                               | $\leq 5.3 \times 10^5$                          | $7.1 \times 10^{-1}$                   | $\leq 1.6$           | $1.6 \times 10^{-1}$                   | $8.2 \times 10^{-1}$ | N/A        | <b><math>2.4 \times 10^{-3}</math></b> | $\geq 8.9 \times 10^1$ | $3.2 \times 10^{-1}$ |
| L427V   | $9.8 \times 10^{-1}$      | $9.1 \times 10^{-1}$                   | $2.2 \times 10^5$                               | <b><math>3.8 \times 10^{-2}</math></b> | 1.8                  | $9.1 \times 10^{-2}$                   | N/A                  | 1.1        | $1.5 \times 10^{-1}$                   | $1.4 \times 10^2$      | $9.8 \times 10^{-1}$ |
| K428G   | $4.0 \times 10^{-1}$      | <b><math>5.0 \times 10^{-3}</math></b> | $6.4 \times 10^5$                               | $8.8 \times 10^{-1}$                   | 1.8                  | $8.0 \times 10^{-2}$                   | N/A                  | 1.0        | $6.6 \times 10^{-1}$                   | $2.0 \times 10^2$      | $2.7 \times 10^{-1}$ |
| K428V   | $6.2 \times 10^{-1}$      | $2.1 \times 10^{-2}$                   | $2.4 \times 10^5$                               | <b><math>3.2 \times 10^{-2}</math></b> | 2.6                  | <b><math>9.0 \times 10^{-4}</math></b> | $9.2 \times 10^{-1}$ | N/A        | $3.3 \times 10^{-2}$                   | $1.4 \times 10^2$      | $9.6 \times 10^{-1}$ |
| K429G   | 1.0                       | 1.0                                    | $4.3 \times 10^5$                               | $3.7 \times 10^{-1}$                   | 1.3                  | $3.4 \times 10^{-1}$                   | $9.2 \times 10^{-1}$ | N/A        | $1.2 \times 10^{-1}$                   | $1.6 \times 10^2$      | $7.0 \times 10^{-1}$ |
| K429V   | 1.4                       | $9.4 \times 10^{-2}$                   | $1.5 \times 10^5$                               | <b><math>1.5 \times 10^{-2}</math></b> | 3.0                  | <b><math>2.6 \times 10^{-3}</math></b> | N/A                  | 1.2        | $2.7 \times 10^{-2}$                   | $1.5 \times 10^2$      | $8.3 \times 10^{-1}$ |
| E430G   | $6.6 \times 10^{-1}$      | $3.7 \times 10^{-2}$                   | $1.8 \times 10^5$                               | <b><math>4.5 \times 10^{-2}</math></b> | 2.1                  | $1.2 \times 10^{-2}$                   | N/A                  | 1.3        | <b>0</b>                               | $1.3 \times 10^2$      | $6.9 \times 10^{-1}$ |
| E430V   | $9.6 \times 10^{-1}$      | $8.3 \times 10^{-1}$                   | $4.5 \times 10^5$                               | $4.6 \times 10^{-1}$                   | 1.1                  | $7.3 \times 10^{-1}$                   | N/A                  | 1.3        | <b><math>5.0 \times 10^{-4}</math></b> | $1.4 \times 10^2$      | $9.9 \times 10^{-1}$ |
| P431G   | $7.8 \times 10^{-1}$      | $3.5 \times 10^{-1}$                   | $2.4 \times 10^5$                               | $7.4 \times 10^{-2}$                   | 2.0                  | $3.8 \times 10^{-2}$                   | N/A                  | 1.0        | $4.9 \times 10^{-1}$                   | $1.0 \times 10^2$      | $4.7 \times 10^{-1}$ |
| P431V   | 1.5                       | $7.7 \times 10^{-2}$                   | $1.3 \times 10^5$                               | <b><math>4.3 \times 10^{-2}</math></b> | 3.8                  | <b><math>2.9 \times 10^{-3}</math></b> | N/A                  | 1.1        | $7.2 \times 10^{-2}$                   | $1.5 \times 10^2$      | $8.2 \times 10^{-1}$ |
| S432G   | $8.2 \times 10^{-1}$      | $4.1 \times 10^{-1}$                   | $5.7 \times 10^5$                               | $8.5 \times 10^{-1}$                   | $6.5 \times 10^{-1}$ | $1.4 \times 10^{-1}$                   | N/A                  | 1.2        | $1.0 \times 10^{-2}$                   | $1.3 \times 10^2$      | $8.3 \times 10^{-1}$ |
| S432V   | $2.6 \times 10^{-1}$      | <b>0</b>                               | $6.1 \times 10^5$                               | $9.7 \times 10^{-1}$                   | -                    | -                                      | N/A                  | 1.1        | <b><math>4.3 \times 10^{-3}</math></b> | $1.6 \times 10^2$      | $7.3 \times 10^{-1}$ |
| V433A   | $7.5 \times 10^{-1}$      | $2.7 \times 10^{-1}$                   | $4.1 \times 10^5$                               | $3.6 \times 10^{-1}$                   | 1.1                  | $7.1 \times 10^{-1}$                   | N/A                  | 1.2        | <b><math>4.6 \times 10^{-3}</math></b> | $1.7 \times 10^2$      | $4.9 \times 10^{-1}$ |
| V433G   | $1.1 \times 10^{-1}$      | <b>0</b>                               | $3.1 \times 10^5$                               | $9.0 \times 10^{-2}$                   | 1.3                  | $4.4 \times 10^{-1}$                   | N/A                  | 1.2        | <b><math>4.0 \times 10^{-4}</math></b> | $1.3 \times 10^2$      | $8.9 \times 10^{-1}$ |
| L434G   | $2.5 \times 10^{-1}$      | <b>0</b>                               | $1.4 \times 10^5$                               | <b><math>2.5 \times 10^{-2}</math></b> | 4.1                  | <b><math>3.1 \times 10^{-4}</math></b> | $5.5 \times 10^{-1}$ | N/A        | <b>0</b>                               | $$                     |                      |

| Variant | $f_a$                     | $f_a$ $p$ -value                       | $(k_{cat}/K_M)_{chem}^{MEP}$ ( $M^{-1}s^{-1}$ ) | $(k_{cat}/K_M)_{chem}^{MEP}$ $p$ -value | FC1                  | FC1 $p$ -value                         | FC2                  | FC3 | FC2/3 $p$ -value                       | FC4 ( $s^{-1}$ )       | FC4 $p$ -value                         |
|---------|---------------------------|----------------------------------------|-------------------------------------------------|-----------------------------------------|----------------------|----------------------------------------|----------------------|-----|----------------------------------------|------------------------|----------------------------------------|
| D440G   | 1.1                       | $5.4 \times 10^{-1}$                   | $2.7 \times 10^5$                               | $1.2 \times 10^{-1}$                    | 1.2                  | $4.4 \times 10^{-1}$                   | $8.8 \times 10^{-1}$ | N/A | $1.7 \times 10^{-2}$                   | $1.1 \times 10^2$      | $5.1 \times 10^{-1}$                   |
| D440V   | $2.1 \times 10^{-1}$      | <b>0</b>                               | $5.6 \times 10^5$                               | $8.2 \times 10^{-1}$                    | 1.6                  | $3.3 \times 10^{-1}$                   | N/A                  | 1.0 | $8.3 \times 10^{-1}$                   | $1.2 \times 10^2$      | $6.9 \times 10^{-1}$                   |
| E441G   | $8.7 \times 10^{-1}$      | $5.3 \times 10^{-1}$                   | $3.9 \times 10^5$                               | $2.4 \times 10^{-1}$                    | 1.7                  | $4.8 \times 10^{-2}$                   | $8.6 \times 10^{-1}$ | N/A | $2.5 \times 10^{-2}$                   | $1.1 \times 10^2$      | $5.6 \times 10^{-1}$                   |
| E441V   | $9.6 \times 10^{-1}$      | $6.5 \times 10^{-1}$                   | $4.2 \times 10^5$                               | $1.8 \times 10^{-1}$                    | $9.9 \times 10^{-1}$ | $9.5 \times 10^{-1}$                   | N/A                  | 1.1 | $2.6 \times 10^{-2}$                   | $1.4 \times 10^2$      | $8.8 \times 10^{-1}$                   |
| I442G   | $1.1 \times 10^{-1}$      | <b>0</b>                               | $4.1 \times 10^5$                               | $3.1 \times 10^{-1}$                    | -                    | -                                      | $7.7 \times 10^{-1}$ | N/A | <b>0</b>                               | $6.8 \times 10^1$      | $1.3 \times 10^{-1}$                   |
| I442V   | $8.0 \times 10^{-1}$      | $3.4 \times 10^{-1}$                   | $4.1 \times 10^5$                               | $2.7 \times 10^{-1}$                    | -                    | -                                      | N/A                  | 1.1 | $4.6 \times 10^{-1}$                   | $1.5 \times 10^2$      | $8.7 \times 10^{-1}$                   |
| W443G   | 1.0                       | $9.1 \times 10^{-1}$                   | $4.9 \times 10^5$                               | $6.0 \times 10^{-1}$                    | 1.5                  | $1.3 \times 10^{-1}$                   | N/A                  | 1.1 | $1.8 \times 10^{-1}$                   | $1.4 \times 10^2$      | $9.7 \times 10^{-1}$                   |
| W443V   | 1.4                       | $1.5 \times 10^{-1}$                   | $2.4 \times 10^5$                               | $6.4 \times 10^{-2}$                    | 1.7                  | $1.1 \times 10^{-1}$                   | N/A                  | 1.1 | $1.3 \times 10^{-1}$                   | $1.8 \times 10^2$      | $4.6 \times 10^{-1}$                   |
| E444G   | 1.0                       | $9.2 \times 10^{-1}$                   | $4.2 \times 10^5$                               | $3.5 \times 10^{-1}$                    | 1.7                  | $1.3 \times 10^{-1}$                   | N/A                  | 1.2 | <b><math>7.0 \times 10^{-4}</math></b> | $1.5 \times 10^2$      | $8.1 \times 10^{-1}$                   |
| E444V   | 1.0                       | $7.8 \times 10^{-1}$                   | $3.8 \times 10^5$                               | $2.2 \times 10^{-1}$                    | $7.3 \times 10^{-1}$ | $3.1 \times 10^{-1}$                   | N/A                  | 1.2 | <b><math>2.1 \times 10^{-3}</math></b> | $1.7 \times 10^2$      | $5.8 \times 10^{-1}$                   |
| S445G   | $1.6 \times 10^{-1}$      | <b>0</b>                               | $6.1 \times 10^5$                               | 1.0                                     | 1.4                  | $2.9 \times 10^{-1}$                   | N/A                  | 1.0 | $8.2 \times 10^{-1}$                   | $1.3 \times 10^2$      | $8.3 \times 10^{-1}$                   |
| S445V   | 1.0                       | $8.7 \times 10^{-1}$                   | $3.4 \times 10^5$                               | $4.0 \times 10^{-1}$                    | 1.5                  | $2.2 \times 10^{-1}$                   | N/A                  | 1.0 | $4.5 \times 10^{-1}$                   | $1.5 \times 10^2$      | $8.4 \times 10^{-1}$                   |
| S446G   | $3.6 \times 10^{-1}$      | <b><math>2.0 \times 10^{-3}</math></b> | $4.0 \times 10^5$                               | $3.3 \times 10^{-1}$                    | 1.2                  | $6.5 \times 10^{-1}$                   | $7.4 \times 10^{-1}$ | N/A | <b>0</b>                               | $1.1 \times 10^2$      | $5.1 \times 10^{-1}$                   |
| S446V   | 1.5                       | $4.8 \times 10^{-2}$                   | $2.9 \times 10^5$                               | $8.5 \times 10^{-2}$                    | 1.8                  | $7.1 \times 10^{-2}$                   | $9.7 \times 10^{-1}$ | N/A | $5.4 \times 10^{-1}$                   | $1.5 \times 10^2$      | $7.5 \times 10^{-1}$                   |
| I447G   | $\leq 8.1 \times 10^{-3}$ | <b>0</b>                               | $\leq 1.9 \times 10^5$                          | <b><math>4.3 \times 10^{-2}</math></b>  | -                    | -                                      | $5.6 \times 10^{-1}$ | N/A | <b>0</b>                               | $\geq 1.0 \times 10^2$ | $4.8 \times 10^{-1}$                   |
| I447V   | 1.1                       | $7.8 \times 10^{-1}$                   | $5.5 \times 10^5$                               | $7.2 \times 10^{-1}$                    | $7.4 \times 10^{-1}$ | $3.9 \times 10^{-1}$                   | N/A                  | 1.1 | $1.4 \times 10^{-1}$                   | $1.3 \times 10^2$      | $8.0 \times 10^{-1}$                   |
| P448G   | $5.4 \times 10^{-2}$      | <b>0</b>                               | $2.9 \times 10^5$                               | $1.0 \times 10^{-1}$                    | -                    | -                                      | $7.9 \times 10^{-1}$ | N/A | <b>0</b>                               | $1.1 \times 10^2$      | $4.7 \times 10^{-1}$                   |
| E449G   | $7.5 \times 10^{-1}$      | $1.8 \times 10^{-1}$                   | $4.4 \times 10^5$                               | $3.1 \times 10^{-1}$                    | 1.4                  | $1.8 \times 10^{-1}$                   | $6.3 \times 10^{-1}$ | N/A | <b><math>1. \times 10^{-4}</math></b>  | $1.1 \times 10^2$      | $5.0 \times 10^{-1}$                   |
| E449V   | $7.9 \times 10^{-1}$      | $3.5 \times 10^{-1}$                   | $2.1 \times 10^5$                               | $1.2 \times 10^{-1}$                    | 3.2                  | $1.5 \times 10^{-2}$                   | $8.4 \times 10^{-1}$ | N/A | <b><math>5.0 \times 10^{-3}</math></b> | $1.2 \times 10^2$      | $6.4 \times 10^{-1}$                   |
| P450G   | 1.4                       | $2.5 \times 10^{-1}$                   | $2.7 \times 10^5$                               | $1.3 \times 10^{-1}$                    | 1.6                  | $8.5 \times 10^{-2}$                   | N/A                  | 1.0 | $4.7 \times 10^{-1}$                   | $8.8 \times 10^1$      | $4.2 \times 10^{-1}$                   |
| P450V   | 1.3                       | $3.4 \times 10^{-1}$                   | $4.9 \times 10^5$                               | $5.2 \times 10^{-1}$                    | $8.7 \times 10^{-1}$ | $7.0 \times 10^{-1}$                   | $9.1 \times 10^{-1}$ | N/A | $8.7 \times 10^{-2}$                   | $1.4 \times 10^2$      | $9.9 \times 10^{-1}$                   |
| I451G   | $8.4 \times 10^{-2}$      | <b>0</b>                               | $1.3 \times 10^5$                               | <b><math>4.2 \times 10^{-2}</math></b>  | $1.0 \times 10^1$    | <b><math>2.6 \times 10^{-3}</math></b> | $4.6 \times 10^{-1}$ | N/A | <b>0</b>                               | $7.7 \times 10^1$      | $1.5 \times 10^{-1}$                   |
| I451V   | $7.1 \times 10^{-1}$      | $1.5 \times 10^{-1}$                   | $6.6 \times 10^5$                               | $7.7 \times 10^{-1}$                    | $6.8 \times 10^{-1}$ | $2.2 \times 10^{-1}$                   | $9.2 \times 10^{-1}$ | N/A | $5.6 \times 10^{-2}$                   | $1.4 \times 10^2$      | $9.4 \times 10^{-1}$                   |
| K452G   | $1.4 \times 10^{-1}$      | <b>0</b>                               | $2.2 \times 10^5$                               | $6.4 \times 10^{-2}$                    | 2.3                  | $2.6 \times 10^{-2}$                   | $7.6 \times 10^{-1}$ | N/A | <b>0</b>                               | $1.1 \times 10^2$      | $6.0 \times 10^{-1}$                   |
| K452V   | $1.1 \times 10^{-1}$      | <b>0</b>                               | $2.3 \times 10^5$                               | <b><math>4.3 \times 10^{-2}</math></b>  | -                    | -                                      | $8.2 \times 10^{-1}$ | N/A | <b><math>6.6 \times 10^{-3}</math></b> | $1.3 \times 10^2$      | $9.3 \times 10^{-1}$                   |
| S453G   | 1.0                       | $9.5 \times 10^{-1}$                   | $7.2 \times 10^5$                               | $6.2 \times 10^{-1}$                    | $6.8 \times 10^{-1}$ | $1.7 \times 10^{-1}$                   | $7.2 \times 10^{-1}$ | N/A | <b><math>1. \times 10^{-4}</math></b>  | $1.0 \times 10^2$      | $3.5 \times 10^{-1}$                   |
| S453V   | 1.1                       | $7.5 \times 10^{-1}$                   | $1.3 \times 10^5$                               | <b><math>2.0 \times 10^{-2}</math></b>  | 4.1                  | <b><math>7.9 \times 10^{-4}</math></b> | $9.2 \times 10^{-1}$ | N/A | $1.2 \times 10^{-1}$                   | $1.3 \times 10^2$      | $7.3 \times 10^{-1}$                   |
| R454G   | $5.9 \times 10^{-2}$      | <b>0</b>                               | $1.1 \times 10^5$                               | <b><math>2.6 \times 10^{-2}</math></b>  | -                    | -                                      | $8.5 \times 10^{-1}$ | N/A | <b><math>7.0 \times 10^{-4}</math></b> | $9.6 \times 10^1$      | $3.0 \times 10^{-1}$                   |
| R454V   | $5.7 \times 10^{-2}$      | <b>0</b>                               | $2.0 \times 10^5$                               | <b><math>3.7 \times 10^{-2}</math></b>  | -                    | -                                      | $5.8 \times 10^{-1}$ | N/A | <b>0</b>                               | $1.3 \times 10^2$      | $7.0 \times 10^{-1}$                   |
| V455A   | 1.2                       | $4.6 \times 10^{-1}$                   | $1.3 \times 10^5$                               | <b><math>2.7 \times 10^{-2}</math></b>  | 2.0                  | $3.7 \times 10^{-2}$                   | N/A                  | 1.1 | $5.3 \times 10^{-2}$                   | $1.2 \times 10^2$      | $7.1 \times 10^{-1}$                   |
| V455G   | $1.4 \times 10^{-1}$      | <b>0</b>                               | $1.5 \times 10^5$                               | <b><math>4.2 \times 10^{-2}</math></b>  | 2.0                  | $2.9 \times 10^{-2}$                   | $8.5 \times 10^{-1}$ | N/A | <b><math>2.0 \times 10^{-4}</math></b> | $1.0 \times 10^2$      | $4.3 \times 10^{-1}$                   |
| I456G   | $1.7 \times 10^{-1}$      | <b>0</b>                               | $2.0 \times 10^5$                               | <b><math>4.2 \times 10^{-2}</math></b>  | 1.8                  | $4.7 \times 10^{-2}$                   | $5.7 \times 10^{-1}$ | N/A | <b>0</b>                               | $8.6 \times 10^1$      | $2.1 \times 10^{-1}$                   |
| I456V   | $8.1 \times 10^{-1}$      | $2.6 \times 10^{-1}$                   | $6.4 \times 10^5$                               | $8.6 \times 10^{-1}$                    | $6.4 \times 10^{-1}$ | $1.7 \times 10^{-1}$                   | N/A                  | 1.0 | $2.6 \times 10^{-1}$                   | $1.7 \times 10^2$      | $4.7 \times 10^{-1}$                   |
| N457G   | $3.8 \times 10^{-1}$      | <b>0</b>                               | $3.3 \times 10^5$                               | $1.7 \times 10^{-1}$                    | 1.5                  | $1.8 \times 10^{-1}$                   | $8.9 \times 10^{-1}$ | N/A | $1.8 \times 10^{-2}$                   | $9.8 \times 10^1$      | $3.4 \times 10^{-1}$                   |
| N457V   | $1.3 \times 10^{-1}$      | <b>0</b>                               | $6.7 \times 10^4$                               | <b><math>2.6 \times 10^{-2}</math></b>  | $1.0 \times 10^1$    | <b><math>1.2 \times 10^{-3}</math></b> | $6.6 \times 10^{-1}$ | N/A | <b>0</b>                               | $1.2 \times 10^2$      | $6.0 \times 10^{-1}$                   |
| G458A   | $1.8 \times 10^{-1}$      | <b>0</b>                               | $7.8 \times 10^5$                               | $4.7 \times 10^{-1}$                    | 2.1                  | $5.1 \times 10^{-2}$                   | $4.8 \times 10^{-1}$ | N/A | <b><math>1. \times 10^{-4}</math></b>  | $9.2 \times 10^1$      | $3.7 \times 10^{-1}$                   |
| G458V   | $2.3 \times 10^{-1}$      | <b>0</b>                               | $9.1 \times 10^4$                               | $6.2 \times 10^{-2}$                    | 4.2                  | <b><math>5.5 \times 10^{-3}</math></b> | $3.3 \times 10^{-1}$ | N/A | <b>0</b>                               | $4.8 \times 10^1$      | <b><math>4.6 \times 10^{-2}</math></b> |
| Y459G   | $\leq 1.6 \times 10^{-2}$ | <b>0</b>                               | $\leq 1.2 \times 10^5$                          | <b><math>3.7 \times 10^{-2}</math></b>  | -                    | -                                      | $8.8 \times 10^{-1}$ | N/A | $1.7 \times 10^{-2}$                   | $\geq 1.0 \times 10^2$ | $4.5 \times 10^{-1}$                   |
| Y459V   | $4.0 \times 10^{-1}$      | <b><math>5.0 \times 10^{-3}</math></b> | $2.3 \times 10^5$                               | $9.2 \times 10^{-2}$                    | 1.6                  | $2.0 \times 10^{-1}$                   | $9.7 \times 10^{-1}$ | N/A | $6.0 \times 10^{-1}$                   | $1.1 \times 10^2$      | $5.6 \times 10^{-1}$                   |
| N460V   | $2.2 \times 10^{-1}$      | <b>0</b>                               | $6.2 \times 10^5$                               | $9.7 \times 10^{-1}$                    | -                    | -                                      | $9.4 \times 10^{-1}$ | N/A | $2.1 \times 10^{-1}$                   | $1.7 \times 10^2$      | $6.8 \times 10^{-1}$                   |
| W461G   | $1.3 \times 10^{-1}$      | <b>0</b>                               | $1.0 \times 10^6$                               | $7.9 \times 10^{-2}$                    | 1.5                  | $2.5 \times 10^{-1}$                   | $6.8 \times 10^{-1}$ | N/A | <b><math>6.0 \times 10^{-4}</math></b> | $9.7 \times 10^1$      | $4.4 \times 10^{-1}$                   |
| W461V   | $1.2 \times 10^{-1}$      | <b>0</b>                               | $1.1 \times 10^6$                               | $5.9 \times 10^{-2}$                    | 1.1                  | $8.3 \times 10^{-1}$                   | $7.2 \times 10^{-1}$ | N/A | <b>0</b>                               | $1.0 \times 10^2$      | $5.4 \times 10^{-1}$                   |
| K462G   | 1.3                       | $4.4 \times 10^{-1}$                   | $2.4 \times 10^5$                               | $1.5 \times 10^{-1}$                    | 2.5                  | <b><math>2.6 \times 10^{-3}</math></b> | N/A                  | 1.0 | $2.4 \times 10^{-1}$                   | $9.7 \times 10^1$      | $3.3 \times 10^{-1}$                   |
| K462V   | $6.5 \times 10^{-1}$      | $1.2 \times 10^{-1}$                   | $6.8 \times 10^5$                               | $7.3 \times 10^{-1}$                    | $7.0 \times 10^{-1}$ | $2.8 \times 10^{-1}$                   | N/A                  | 1.0 | $8.6 \times 10^{-1}$                   | $1.3 \times 10^2$      | $8.3 \times 10^{-1}$                   |
| R463G   | $1.8 \times 10^{-1}$      | <b>0</b>                               | $1.5 \times 10^5$                               | <b><math>1.7 \times 10^{-2}</math></b>  | 2.2                  | $3.8 \times 10^{-2}$                   | N/A                  | 1.1 | $9.9 \times 10^{-2}$                   | $3.6 \times 10^1$      | <b><math>2.8 \times 10^{-2}</math></b> |
| R463V   | $3.2 \times 10^{-1}$      | <b>0</b>                               | $3.9 \times 10^5$                               | $2.4 \times 10^{-1}$                    | $9.9 \times 10^{-1}$ | $9.9 \times 10^{-1}$                   | $8.4 \times 10^{-1}$ | N/A | <b><math>3.8 \times 10^{-3}</math></b> | $1.3 \times 10^2$      | $8.5 \times 10^{-1}$                   |
| S464G   | 1.1                       | $7.7 \times 10^{-1}$                   | $5.2 \times 10^5$                               | $6.4 \times 10^{-1}$                    | $9.4 \times 10^{-1}$ | $8.5 \times 10^{-1}$                   | $7.3 \times 10^{-1}$ | N/A | <b><math>1.7 \times 10^{-3}</math></b> | $8.0 \times 10^1$      | $4.1 \times 10^{-1}$                   |
| S464V   | -                         | -                                      | -                                               | -                                       | -                    | -                                      | -                    | -   | -                                      | -                      | -                                      |
| G465A   | $1.7 \times 10^{-1}$      | <b>0</b>                               | $5.1 \times 10^5$                               | $6.2 \times 10^{-1}$                    | 1.2                  | $4.8 \times 10^{-1}$                   | $6.8 \times 10^{-1}$ | N/A | <b>0</b>                               | $8.0 \times 10^1$      | $2.8 \times 10^{-1}$                   |
| G465V   | $\leq 4.6 \times 10^{-3}$ | <b>0</b>                               | $\leq 1.3 \times 10^5$                          | $6.4 \times 10^{-2}$                    | -                    | -                                      | $1.0 \times 10^{-1}$ | N/A | <b><math>4.0 \times 10^{-4}</math></b> | $\geq 1.9 \times 10^1$ | $6.4 \times 10^{-2}$                   |
| D466G   | $3.7 \times 10^{-1}$      | <b><math>1.0 \times 10^{-3}</math></b> | $1.9 \times 10^5$                               | $6.8 \times 10^{-2}$                    | 2.9                  | <b><math>4.7 \times 10^{-3}</math></b> | N/A                  | 1.1 | $5.7 \times 10^{-2}$                   | $9.6 \times 10^1$      | $3.8 \times 10^{-1}$                   |
| D466V   | $7.4 \times 10^{-1}$      | $2.0 \times 10^{-1}$                   | $5.0 \times 10^4$                               | <b><math>1.3 \times 10^{-2}</math></b>  | 5.2                  | <b><math>4.1 \times 10^{-4}</math></b> | N/A                  | 1.2 | <b><math>5.1 \times 10^{-3}</math></b> | $1.3 \times 10^2$      | $8.3 \times 10^{-1}$                   |
| I467G   | $2.2 \times 10^{-1}$      | <b>0</b>                               | $2.2 \times 10^5$                               | $6.9 \times 10^{-2}$                    | 1.4                  | $4.5 \times 10^{-1}$                   | N/A                  | 1.0 | $7.9 \times 10^{-1}$                   | $1.2 \times 10^2$      | $6.4 \times 10^{-1}$                   |
| I467V   | $6.6 \times 10^{-1}$      | $6.7 \times 10^{-2}$                   | $7.4 \times 10^5$                               | $4.4 \times 10^{-1}$                    | $5.9 \times 10^{-1}$ | $1.1 \times 10^{-1}$                   | N/A                  | 1.0 | $9.6 \times 10^{-1}$                   | $1.3 \times 10^2$      | $7.7 \times 10^{-1}$                   |
| Q468G   | 1.6                       | $7.2 \times 10^{-2}$                   | $2.5 \times 10^5$                               | $8.4 \times 10^{-2}$                    | 1.6                  | $1.1 \times 10^{-1}$                   | N/A                  | 1.1 | $1.2 \times 10^{-1}$                   | $1.5 \times 10^2$      | $9.1 \times 10^{-1}$                   |
| Q468V   | $4.2 \times 10^{-1}$      | <b>0</b>                               | $9.2 \times 10^5$                               | $1.0 \times 10^{-1}$                    | $4.9 \times 10^{-1}$ | $3.1 \times 10^{-2}$                   | N/A                  | 1.3 | <b><math>2.8 \times 10^{-3}</math></b> | $1.3 \times 10^2$      | $8.7 \times 10^{-1}$                   |
| I469G   | $9.6 \times 10^{-1}$      | $8.3 \times 10^{-1}$                   | $1.1 \times 10^5$                               | $7.6 \times 10^{-2}$                    | 2.6                  | $1.6 \times 10^{-2}$                   | N/A                  | 1.0 | $3.7 \times 10^{-1}$                   | $1.2 \times 10^2$      | $7.7 \times 10^{-1}$                   |
| I469V   | $5.7 \times 10^{-1}$      | $2.5 \times 10^{-2}$                   | $9.9 \times 10^5$                               | $6.7 \times 10^{-2}$                    | $7.4 \times 10^{-1}$ | $2.8 \times 10^{-1}$                   | 1.0                  | N/A | $9.5 \times 10^{-1}$                   | $1.5 \times 10^2$      | $9.2 \times 10^{-1}$                   |
| I470G   | $1.3 \times 10^{-1}$      | <b>0</b>                               | $1.7 \times 10^5$                               | $6.9 \times 10^{-2}$                    | 3.3                  | <b><math>8.1 \times 10^{-3}</math></b> | $7.0 \times 10^{-1}$ | N/A | <b><math>4.0 \times 10^{-4}</math></b> | $5.9 \times 10^1$      | $1.4 \times 10^{-1}$                   |
| I470V   | $3.3 \times 10^{-1}$      | <b>0</b>                               | $1.6 \times 10^6$                               | <b><math>4.0 \times 10^{-3}</math></b>  | $5.2 \times 10^{-1}$ | $5.8 \times 10^{-2}$                   | $9.8 \times 10^{-1}$ | N/A | $4.4 \times 10^{-1}$                   | $1.5 \times 10^2$      | $8.3 \times 10^{-1}$                   |
| S471G   | 1.6                       | $5.6 \times 10^{-2}$                   | $4.0 \times 10^5$                               | $3.0 \times 10^{-1}$                    | 1.1                  | $8.4 \times 10^{-1}$                   | $8.2 \times 10^{-1}$ | N/A | <b><math>1.3 \times 10^{-3}</math></b> | $1.2 \times 10^2$      | $6.7 \times 10^{-1}$                   |
| S471V   | 1.1                       | $8.1 \times 10^{-1}$                   | $1.1 \times 10^6$                               | $1.1 \times 10^{-1}$                    | $3.5 \times 10^{-1}$ | <b><math>3.3 \times 10^{-3}</math></b> | $9.9 \times 10^{-1}$ | N/A | $7.1 \times 10^{-1}$                   | $1.4 \times 10^2$      | $9.9 \times 10^{-1}$                   |
| K472G   | $4.3 \times 10^{-1}$      | <b><math>7.0 \times 10^{-3}</math></b> | $6.7 \times 10^5$                               | $7.6 \times 10^{-1}$                    | $9.7 \times 10^{-1}$ | $9.3 \times 10^{-1}$                   | $7.6 \times 10^{-1}$ | N/A | <b><math>1. \times 10^{-4}</math></b>  | $7.4 \times 10^1$      | $2.1 \times 10^{-1}$                   |
| K472V   | $2.6 \times 10^{-1}$      | <b>0</b>                               | $1.4 \times 10^6$                               | <b><math>1.2 \times 10^{-2}</math></b>  | -                    | -                                      | $8.2 \times 10^{-1}$ | N/A | <b><math>3.0 \times 10^{-4}</math></b> | $1.2 \times 10^2$      | $6.2 \times 10^{-1}$                   |
| D473G   | 1.3                       | $3.6 \times 10^{-1}$                   | $4.4 \times 10^5$                               | $3.8 \times 10^{-1}$                    | 1.5                  | $2.3 \times 10^{-1}$                   | $9.2 \times 10^{-1}$ | N/A | $1.4 \times 10$                        |                        |                                        |



| Variant | $f_a$                     | $f_a$ p-value                          | $(k_{cat}/K_M)_{chem}^{MEP}$ ( $M^{-1}s^{-1}$ ) | $(k_{cat}/K_M)_{chem}^{MEP}$ p-value   | FC1                  | FC1 p-value                            | FC2                  | FC3 | FC2/3 p-value                          | FC4 ( $s^{-1}$ )       | FC4 p-value                            |
|---------|---------------------------|----------------------------------------|-------------------------------------------------|----------------------------------------|----------------------|----------------------------------------|----------------------|-----|----------------------------------------|------------------------|----------------------------------------|
| A478V   | $7.8 \times 10^{-1}$      | $3.4 \times 10^{-1}$                   | $4.0 \times 10^5$                               | $2.7 \times 10^{-1}$                   | $7.5 \times 10^{-1}$ | $4.1 \times 10^{-1}$                   | N/A                  | 1.1 | $1.2 \times 10^{-1}$                   | $1.5 \times 10^2$      | $8.4 \times 10^{-1}$                   |
| Y479G   | 1.7                       | $1.3 \times 10^{-1}$                   | $6.4 \times 10^5$                               | $9.2 \times 10^{-1}$                   | $4.1 \times 10^{-1}$ | $1.1 \times 10^{-2}$                   | $8.7 \times 10^{-1}$ | N/A | $1.4 \times 10^{-2}$                   | $1.1 \times 10^2$      | $7.3 \times 10^{-1}$                   |
| Y479V   | $8.0 \times 10^{-1}$      | $2.6 \times 10^{-1}$                   | $8.8 \times 10^5$                               | $8.7 \times 10^{-2}$                   | $2.8 \times 10^{-1}$ | <b><math>3.0 \times 10^{-5}</math></b> | N/A                  | 1.0 | $2.8 \times 10^{-1}$                   | $2.0 \times 10^2$      | $1.5 \times 10^{-1}$                   |
| S480G   | 1.2                       | $6.1 \times 10^{-1}$                   | $4.1 \times 10^5$                               | $3.6 \times 10^{-1}$                   | 2.0                  | $2.1 \times 10^{-2}$                   | $6.6 \times 10^{-1}$ | N/A | <b><math>3.0 \times 10^{-4}</math></b> | $1.1 \times 10^2$      | $5.1 \times 10^{-1}$                   |
| S480V   | $6.7 \times 10^{-1}$      | $9.2 \times 10^{-2}$                   | $1.1 \times 10^6$                               | <b><math>2.8 \times 10^{-2}</math></b> | $2.8 \times 10^{-1}$ | $1.1 \times 10^{-2}$                   | N/A                  | 1.2 | <b><math>8.7 \times 10^{-3}</math></b> | $2.6 \times 10^2$      | <b><math>4.1 \times 10^{-2}</math></b> |
| K481G   | 1.3                       | $3.2 \times 10^{-1}$                   | $4.9 \times 10^5$                               | $5.4 \times 10^{-1}$                   | $9.3 \times 10^{-1}$ | $8.1 \times 10^{-1}$                   | $9.8 \times 10^{-1}$ | N/A | $5.7 \times 10^{-1}$                   | $9.6 \times 10^1$      | $3.4 \times 10^{-1}$                   |
| K481V   | $9.2 \times 10^{-1}$      | $8.1 \times 10^{-1}$                   | $5.6 \times 10^5$                               | $8.2 \times 10^{-1}$                   | $7.8 \times 10^{-1}$ | $4.7 \times 10^{-1}$                   | N/A                  | 1.1 | $7.4 \times 10^{-2}$                   | $1.6 \times 10^2$      | $7.4 \times 10^{-1}$                   |
| K482G   | $8.0 \times 10^{-1}$      | $3.0 \times 10^{-1}$                   | $4.3 \times 10^5$                               | $3.2 \times 10^{-1}$                   | $7.7 \times 10^{-1}$ | $3.1 \times 10^{-1}$                   | $7.8 \times 10^{-1}$ | N/A | <b>0</b>                               | $1.1 \times 10^2$      | $5.6 \times 10^{-1}$                   |
| K482V   | $9.9 \times 10^{-1}$      | $9.3 \times 10^{-1}$                   | $5.8 \times 10^5$                               | $9.2 \times 10^{-1}$                   | $7.6 \times 10^{-1}$ | $2.7 \times 10^{-1}$                   | N/A                  | 1.0 | $4.7 \times 10^{-1}$                   | $1.5 \times 10^2$      | $7.9 \times 10^{-1}$                   |
| G483A   | $3.3 \times 10^{-1}$      | <b>0</b>                               | $3.3 \times 10^5$                               | $1.2 \times 10^{-1}$                   | 2.6                  | <b><math>1.1 \times 10^{-3}</math></b> | $5.0 \times 10^{-1}$ | N/A | <b><math>1. \times 10^{-4}</math></b>  | $1.5 \times 10^2$      | $9.3 \times 10^{-1}$                   |
| G483V   | $6.7 \times 10^{-1}$      | $1.7 \times 10^{-1}$                   | $2.3 \times 10^5$                               | $1.1 \times 10^{-1}$                   | $8.7 \times 10^{-1}$ | $5.9 \times 10^{-1}$                   | $3.2 \times 10^{-1}$ | N/A | <b><math>2.0 \times 10^{-4}</math></b> | $5.6 \times 10^1$      | $2.6 \times 10^{-1}$                   |
| T484G   | 1.1                       | $6.8 \times 10^{-1}$                   | $2.4 \times 10^5$                               | $8.7 \times 10^{-2}$                   | 1.1                  | $8.7 \times 10^{-1}$                   | $4.5 \times 10^{-1}$ | N/A | <b>0</b>                               | $7.3 \times 10^1$      | $1.8 \times 10^{-1}$                   |
| T484V   | $5.9 \times 10^{-1}$      | <b><math>9.0 \times 10^{-3}</math></b> | $5.9 \times 10^5$                               | $9.2 \times 10^{-1}$                   | $9.7 \times 10^{-1}$ | $9.6 \times 10^{-1}$                   | $9.1 \times 10^{-1}$ | N/A | $6.7 \times 10^{-2}$                   | $1.8 \times 10^2$      | $3.3 \times 10^{-1}$                   |
| T485G   | $8.8 \times 10^{-1}$      | $6.3 \times 10^{-1}$                   | $5.0 \times 10^5$                               | $5.4 \times 10^{-1}$                   | 1.7                  | $8.8 \times 10^{-2}$                   | $6.5 \times 10^{-1}$ | N/A | <b><math>1. \times 10^{-4}</math></b>  | $1.3 \times 10^2$      | $8.9 \times 10^{-1}$                   |
| T485V   | $4.7 \times 10^{-1}$      | <b><math>6.0 \times 10^{-3}</math></b> | $1.1 \times 10^6$                               | <b><math>3.4 \times 10^{-2}</math></b> | -                    | -                                      | $6.5 \times 10^{-1}$ | N/A | <b>0</b>                               | $2.1 \times 10^2$      | $1.7 \times 10^{-1}$                   |
| H486G   | $\leq 3.2 \times 10^{-2}$ | <b>0</b>                               | $\leq 3.7 \times 10^4$                          | <b><math>7.0 \times 10^{-3}</math></b> | -                    | -                                      | -                    | -   | -                                      | -                      | -                                      |
| H486V   | $\leq 4.9 \times 10^{-3}$ | <b><math>1.0 \times 10^{-3}</math></b> | $\leq 2.0 \times 10^5$                          | $1.7 \times 10^{-1}$                   | -                    | -                                      | -                    | -   | -                                      | -                      | -                                      |
| S487G   | $\leq 9.1 \times 10^{-1}$ | $8.2 \times 10^{-1}$                   | $\leq 4.6 \times 10^5$                          | $5.5 \times 10^{-1}$                   | $\leq 4.5$           | <b><math>2.5 \times 10^{-4}</math></b> | $6.3 \times 10^{-1}$ | N/A | <b><math>2.0 \times 10^{-4}</math></b> | $\geq 1.2 \times 10^2$ | $7.4 \times 10^{-1}$                   |
| S487V   | 1.2                       | $3.4 \times 10^{-1}$                   | $1.5 \times 10^5$                               | <b><math>2.2 \times 10^{-2}</math></b> | -                    | -                                      | N/A                  | 1.7 | <b><math>1. \times 10^{-4}</math></b>  | $1.5 \times 10^2$      | $9.0 \times 10^{-1}$                   |
| V488A   | 2.3                       | <b><math>9.0 \times 10^{-3}</math></b> | $3.7 \times 10^5$                               | $2.0 \times 10^{-1}$                   | 1.3                  | $3.8 \times 10^{-1}$                   | $9.2 \times 10^{-1}$ | N/A | $3.3 \times 10^{-1}$                   | $1.3 \times 10^2$      | $8.0 \times 10^{-1}$                   |
| V488G   | 2.0                       | <b><math>8.0 \times 10^{-3}</math></b> | $2.5 \times 10^5$                               | $7.6 \times 10^{-2}$                   | 4.8                  | <b><math>2.0 \times 10^{-5}</math></b> | $5.9 \times 10^{-1}$ | N/A | <b>0</b>                               | $9.3 \times 10^1$      | $2.9 \times 10^{-1}$                   |
| W489G   | $2.5 \times 10^{-1}$      | <b>0</b>                               | $2.7 \times 10^5$                               | $6.6 \times 10^{-2}$                   | 4.3                  | <b><math>3.2 \times 10^{-4}</math></b> | $2.0 \times 10^{-1}$ | N/A | <b>0</b>                               | $3.5 \times 10^1$      | <b><math>4.6 \times 10^{-2}</math></b> |
| W489V   | $4.6 \times 10^{-1}$      | <b><math>7.0 \times 10^{-3}</math></b> | $3.0 \times 10^4$                               | <b><math>1.4 \times 10^{-2}</math></b> | -                    | -                                      | $4.9 \times 10^{-1}$ | N/A | <b><math>2.0 \times 10^{-4}</math></b> | $9.3 \times 10^1$      | $3.1 \times 10^{-1}$                   |
| N490G   | 1.3                       | $3.2 \times 10^{-1}$                   | $1.6 \times 10^5$                               | $5.3 \times 10^{-2}$                   | 3.7                  | <b><math>2.5 \times 10^{-4}</math></b> | $7.2 \times 10^{-1}$ | N/A | <b><math>1. \times 10^{-4}</math></b>  | $9.1 \times 10^1$      | $3.0 \times 10^{-1}$                   |
| N490V   | $7.1 \times 10^{-1}$      | $8.5 \times 10^{-2}$                   | $2.6 \times 10^5$                               | <b><math>4.6 \times 10^{-2}</math></b> | 2.1                  | <b><math>8.8 \times 10^{-3}</math></b> | $7.9 \times 10^{-1}$ | N/A | <b>0</b>                               | $1.0 \times 10^2$      | $3.7 \times 10^{-1}$                   |
| S491G   | $6.3 \times 10^{-1}$      | $1.1 \times 10^{-1}$                   | $4.2 \times 10^5$                               | $5.2 \times 10^{-1}$                   | 1.1                  | $7.4 \times 10^{-1}$                   | $8.7 \times 10^{-1}$ | N/A | <b><math>6.5 \times 10^{-3}</math></b> | $1.0 \times 10^2$      | $4.5 \times 10^{-1}$                   |
| S491V   | $7.1 \times 10^{-1}$      | $1.2 \times 10^{-1}$                   | $4.0 \times 10^5$                               | $2.4 \times 10^{-1}$                   | $7.1 \times 10^{-1}$ | $2.9 \times 10^{-1}$                   | $8.2 \times 10^{-1}$ | N/A | <b><math>1. \times 10^{-4}</math></b>  | $8.8 \times 10^1$      | $2.3 \times 10^{-1}$                   |
| Y492G   | $9.1 \times 10^{-1}$      | $7.1 \times 10^{-1}$                   | $2.4 \times 10^5$                               | $9.0 \times 10^{-2}$                   | 2.2                  | $1.1 \times 10^{-2}$                   | $4.1 \times 10^{-1}$ | N/A | <b><math>1. \times 10^{-4}</math></b>  | $5.3 \times 10^1$      | $1.1 \times 10^{-1}$                   |
| Y492V   | $5.3 \times 10^{-1}$      | $1.3 \times 10^{-2}$                   | $5.1 \times 10^5$                               | $5.9 \times 10^{-1}$                   | -                    | -                                      | $9.8 \times 10^{-1}$ | N/A | $5.7 \times 10^{-1}$                   | $9.2 \times 10^1$      | $3.2 \times 10^{-1}$                   |
| D493G   | $5.4 \times 10^{-1}$      | $1.2 \times 10^{-2}$                   | $6.9 \times 10^4$                               | <b><math>2.2 \times 10^{-2}</math></b> | 2.1                  | $1.1 \times 10^{-1}$                   | $2.2 \times 10^{-1}$ | N/A | <b><math>1. \times 10^{-4}</math></b>  | $4.1 \times 10^1$      | $6.5 \times 10^{-2}$                   |
| D493V   | $8.8 \times 10^{-1}$      | $5.4 \times 10^{-1}$                   | $9.4 \times 10^4$                               | <b><math>1.8 \times 10^{-2}</math></b> | 1.7                  | $1.4 \times 10^{-1}$                   | $3.5 \times 10^{-1}$ | N/A | <b>0</b>                               | $8.4 \times 10^1$      | $1.8 \times 10^{-1}$                   |
| S494G   | $5.9 \times 10^{-1}$      | $3.9 \times 10^{-2}$                   | $3.4 \times 10^5$                               | $1.8 \times 10^{-1}$                   | 2.1                  | $2.7 \times 10^{-2}$                   | $6.8 \times 10^{-1}$ | N/A | <b><math>1. \times 10^{-4}</math></b>  | $1.0 \times 10^2$      | $4.9 \times 10^{-1}$                   |
| S494V   | $2.0 \times 10^{-1}$      | <b>0</b>                               | $3.6 \times 10^5$                               | $1.3 \times 10^{-1}$                   | 1.0                  | $9.5 \times 10^{-1}$                   | $3.9 \times 10^{-1}$ | N/A | <b>0</b>                               | $1.1 \times 10^2$      | $5.1 \times 10^{-1}$                   |
| H495G   | -                         | -                                      | -                                               | -                                      | -                    | -                                      | -                    | -   | -                                      | -                      | -                                      |
| H495V   | $1.5 \times 10^{-1}$      | <b>0</b>                               | $1.0 \times 10^6$                               | $1.6 \times 10^{-1}$                   | -                    | -                                      | $8.2 \times 10^{-1}$ | N/A | $1.9 \times 10^{-2}$                   | $1.6 \times 10^2$      | $8.1 \times 10^{-1}$                   |
| I496G   | $\leq 5.3 \times 10^{-3}$ | <b>0</b>                               | $\leq 2.5 \times 10^5$                          | $1.1 \times 10^{-1}$                   | -                    | -                                      | $6.4 \times 10^{-1}$ | N/A | <b><math>1.1 \times 10^{-3}</math></b> | $\geq 1.4 \times 10^2$ | $9.3 \times 10^{-1}$                   |
| I496V   | $2.9 \times 10^{-1}$      | <b>0</b>                               | $1.2 \times 10^6$                               | <b><math>3.9 \times 10^{-2}</math></b> | $6.8 \times 10^{-1}$ | $2.4 \times 10^{-1}$                   | $8.5 \times 10^{-1}$ | N/A | <b><math>8.1 \times 10^{-3}</math></b> | $1.5 \times 10^2$      | $8.3 \times 10^{-1}$                   |
| P497G   | $1.5 \times 10^{-1}$      | <b>0</b>                               | $6.4 \times 10^5$                               | $8.7 \times 10^{-1}$                   | -                    | -                                      | $9.2 \times 10^{-1}$ | N/A | $2.8 \times 10^{-1}$                   | $1.3 \times 10^2$      | $9.3 \times 10^{-1}$                   |
| L498G   | $\leq 6.0 \times 10^{-1}$ | $9.5 \times 10^{-2}$                   | $\leq 2.3 \times 10^5$                          | $1.1 \times 10^{-1}$                   | $\leq 5.4$           | <b><math>5.0 \times 10^{-5}</math></b> | $7.5 \times 10^{-1}$ | N/A | <b><math>4.0 \times 10^{-4}</math></b> | $\geq 8.8 \times 10^1$ | $3.8 \times 10^{-1}$                   |
| L498V   | $4.0 \times 10^{-1}$      | <b><math>3.0 \times 10^{-3}</math></b> | $6.9 \times 10^5$                               | $6.5 \times 10^{-1}$                   | $6.8 \times 10^{-1}$ | $2.1 \times 10^{-1}$                   | N/A                  | 1.1 | $1.1 \times 10^{-1}$                   | $1.7 \times 10^2$      | $6.4 \times 10^{-1}$                   |
| L499G   | $8.0 \times 10^{-1}$      | $4.6 \times 10^{-1}$                   | $1.7 \times 10^5$                               | $7.8 \times 10^{-2}$                   | 2.1                  | $5.6 \times 10^{-2}$                   | $9.7 \times 10^{-1}$ | N/A | $6.3 \times 10^{-1}$                   | $1.3 \times 10^2$      | $8.7 \times 10^{-1}$                   |
| L499V   | $6.9 \times 10^{-1}$      | $1.2 \times 10^{-1}$                   | $7.1 \times 10^5$                               | $5.3 \times 10^{-1}$                   | $7.3 \times 10^{-1}$ | $3.3 \times 10^{-1}$                   | N/A                  | 1.1 | $6.9 \times 10^{-2}$                   | $1.5 \times 10^2$      | $7.6 \times 10^{-1}$                   |
| F500G   | $\leq 5.1 \times 10^{-4}$ | <b>0</b>                               | $\leq 2.2 \times 10^6$                          | <b><math>1.0 \times 10^{-3}</math></b> | -                    | -                                      | -                    | -   | -                                      | -                      | -                                      |
| F500V   | $3.2 \times 10^{-1}$      | <b><math>1.0 \times 10^{-3}</math></b> | $3.3 \times 10^5$                               | $2.3 \times 10^{-1}$                   | -                    | -                                      | $6.8 \times 10^{-1}$ | N/A | <b>0</b>                               | $1.2 \times 10^2$      | $7.2 \times 10^{-1}$                   |
| M501G   | $5.5 \times 10^{-1}$      | $5.6 \times 10^{-2}$                   | $6.0 \times 10^4$                               | <b><math>4.9 \times 10^{-2}</math></b> | 3.3                  | <b><math>5.3 \times 10^{-3}</math></b> | $9.5 \times 10^{-1}$ | N/A | $3.5 \times 10^{-1}$                   | $1.1 \times 10^2$      | $6.7 \times 10^{-1}$                   |
| M501V   | $7.8 \times 10^{-1}$      | $3.4 \times 10^{-1}$                   | $2.4 \times 10^5$                               | $2.5 \times 10^{-1}$                   | -                    | -                                      | $9.6 \times 10^{-1}$ | N/A | $3.8 \times 10^{-1}$                   | $1.4 \times 10^2$      | 1.0                                    |
| G502A   | $1.6 \times 10^{-1}$      | <b><math>2.0 \times 10^{-3}</math></b> | $4.9 \times 10^5$                               | $6.4 \times 10^{-1}$                   | -                    | -                                      | $9.0 \times 10^{-1}$ | N/A | $2.1 \times 10^{-1}$                   | $1.3 \times 10^2$      | $9.2 \times 10^{-1}$                   |
| G502V   | $\leq 1.1 \times 10^{-3}$ | <b>0</b>                               | $\leq 1.0 \times 10^7$                          | <b><math>1.0 \times 10^{-3}</math></b> | -                    | -                                      | -                    | -   | -                                      | -                      | -                                      |
| W503G   | $4.0 \times 10^{-1}$      | <b><math>5.0 \times 10^{-3}</math></b> | $3.5 \times 10^5$                               | $2.3 \times 10^{-1}$                   | 1.5                  | $2.7 \times 10^{-1}$                   | $9.8 \times 10^{-1}$ | N/A | $5.6 \times 10^{-1}$                   | $8.4 \times 10^1$      | $2.5 \times 10^{-1}$                   |
| W503V   | $3.0 \times 10^{-1}$      | <b>0</b>                               | $3.3 \times 10^5$                               | $2.3 \times 10^{-1}$                   | 2.4                  | $3.9 \times 10^{-2}$                   | $9.7 \times 10^{-1}$ | N/A | $5.4 \times 10^{-1}$                   | $1.8 \times 10^2$      | $3.8 \times 10^{-1}$                   |
| G504A   | $8.7 \times 10^{-1}$      | $5.4 \times 10^{-1}$                   | $3.1 \times 10^5$                               | $1.4 \times 10^{-1}$                   | 1.3                  | $3.7 \times 10^{-1}$                   | $9.9 \times 10^{-1}$ | N/A | $6.7 \times 10^{-1}$                   | $1.2 \times 10^2$      | $6.6 \times 10^{-1}$                   |
| G504V   | $2.6 \times 10^{-1}$      | <b>0</b>                               | $8.1 \times 10^5$                               | $3.0 \times 10^{-1}$                   | -                    | -                                      | N/A                  | 1.0 | $3.7 \times 10^{-1}$                   | $1.6 \times 10^2$      | $6.9 \times 10^{-1}$                   |
| I505G   | $1.3 \times 10^{-1}$      | <b>0</b>                               | $1.9 \times 10^5$                               | $5.2 \times 10^{-2}$                   | -                    | -                                      | N/A                  | 1.0 | $3.6 \times 10^{-1}$                   | $1.1 \times 10^2$      | $4.8 \times 10^{-1}$                   |
| I505V   | 1.3                       | $2.6 \times 10^{-1}$                   | $4.6 \times 10^5$                               | $3.3 \times 10^{-1}$                   | $8.2 \times 10^{-1}$ | $5.0 \times 10^{-1}$                   | N/A                  | 1.1 | $6.2 \times 10^{-2}$                   | $1.4 \times 10^2$      | $9.8 \times 10^{-1}$                   |
| K506G   | 1.6                       | $7.4 \times 10^{-2}$                   | $2.7 \times 10^5$                               | $1.1 \times 10^{-1}$                   | 1.6                  | $8.6 \times 10^{-2}$                   | $9.6 \times 10^{-1}$ | N/A | $3.9 \times 10^{-1}$                   | $1.3 \times 10^2$      | $7.8 \times 10^{-1}$                   |
| K506V   | $8.4 \times 10^{-1}$      | $4.4 \times 10^{-1}$                   | $4.3 \times 10^5$                               | $3.7 \times 10^{-1}$                   | 1.0                  | $9.6 \times 10^{-1}$                   | N/A                  | 1.1 | $1.7 \times 10^{-2}$                   | $1.6 \times 10^2$      | $5.8 \times 10^{-1}$                   |
| Q507G   | 1.1                       | $5.9 \times 10^{-1}$                   | $4.5 \times 10^5$                               | $3.6 \times 10^{-1}$                   | 1.0                  | $9.5 \times 10^{-1}$                   | $8.6 \times 10^{-1}$ | N/A | <b><math>9.2 \times 10^{-3}</math></b> | $1.1 \times 10^2$      | $5.6 \times 10^{-1}$                   |
| Q507V   | 1.2                       | $4.9 \times 10^{-1}$                   | $5.8 \times 10^5$                               | $8.6 \times 10^{-1}$                   | $7.0 \times 10^{-1}$ | $2.7 \times 10^{-1}$                   | N/A                  | 1.0 | $6.7 \times 10^{-1}$                   | $1.8 \times 10^2$      | $5.1 \times 10^{-1}$                   |
| G508A   | $4.9 \times 10^{-1}$      | <b><math>6.0 \times 10^{-3}</math></b> | $5.1 \times 10^5$                               | $6.3 \times 10^{-1}$                   | 1.3                  | $3.6 \times 10^{-1}$                   | $8.4 \times 10^{-1}$ | N/A | <b><math>6.3 \times 10^{-3}</math></b> | $1.2 \times 10^2$      | $6.7 \times 10^{-1}$                   |
| G508V   | $1.7 \times 10^{-1}$      | <b>0</b>                               | $7.1 \times 10^5$                               | $5.9 \times 10^{-1}$                   | $7.0 \times 10^{-1}$ | $2.9 \times 10^{-1}$                   | $8.1 \times 10^{-1}$ | N/A | <b>0</b>                               | $1.2 \times 10^2$      | $5.9 \times 10^{-1}$                   |
| E509G   | $1.5 \times 10^{-1}$      | <b>0</b>                               | $1.1 \times 10^6$                               | $1.0 \times 10^{-1}$                   | $6.2 \times 10^{-1}$ | $2.4 \times 10^{-1}$                   | $7.0 \times 10^{-1}$ | N/A | <b>0</b>                               | $9.6 \times 10^1$      | $3.8 \times 10^{-1}$                   |
| E509V   | $4.0 \times 10^{-1}$      | <b><math>5.0 \times 10^{-3}</math></b> | $5.1 \times 10^5$                               | $6.5 \times 10^{-1}$                   | $8.6 \times 10^{-1}$ | $7.0 \times 10^{-1}$                   | $8.9 \times 10^{-1}$ | N/A | $4.5 \times 10^{-2}$                   | $1.2 \times 10^2$      | $7.3 \times 10^{-1}$                   |
| S510G   | $8.8 \times 10^{-1}$      | $6.0 \times 10^{-1}$                   | $3.0 \times 10^5$                               | $2.0 \times 10^{-1}$                   | 1.5                  | $2.1 \times 10^{-1}$                   | $8.8 \times 10^{-1}$ | N/A | $3.4 \times 10^{-2}$                   | $9.4 \times 10^1$      | $3.2 \times 10^{-1}$                   |
| S510V   | $1.3 \times 10^{-1}$      | <b>0</b>                               | $2.6 \times 10^5$                               | $1.1 \times 10^{-1}$                   | -                    | -                                      | $7.4 \times 10^{-1}$ | N/A | <b><math>3.2 \times 10^{-3}</math></b> | $1.4 \times 10^2$      | $9.6 \times 10^{-1}$                   |
| N511G   | 1.2                       | $4.7 \times 10^{-1}$                   | $2.2 \times 10^5$                               | $9.7 \times 10^{-2}$                   | 2.2                  | $2.6 \times 10^{-2}$                   | $9.9 \$              |     |                                        |                        |                                        |

| Variant | $f_a$                     | $f_a$ $p$ -value                       | $(k_{cat}/K_M)_{chem}^{MeP}$ ( $M^{-1}s^{-1}$ ) | $(k_{cat}/K_M)_{chem}^{MeP}$ $p$ -value | FC1                  | FC1 $p$ -value                         | FC2                  | FC3 | FC2/3 $p$ -value                       | FC4 ( $s^{-1}$ )       | FC4 $p$ -value       |
|---------|---------------------------|----------------------------------------|-------------------------------------------------|-----------------------------------------|----------------------|----------------------------------------|----------------------|-----|----------------------------------------|------------------------|----------------------|
| M516V   | $4.5 \times 10^{-1}$      | <b><math>6.0 \times 10^{-3}</math></b> | $6.9 \times 10^5$                               | $6.9 \times 10^{-1}$                    | $7.8 \times 10^{-1}$ | $5.1 \times 10^{-1}$                   | $8.4 \times 10^{-1}$ | N/A | <b><math>4.4 \times 10^{-3}</math></b> | $1.4 \times 10^2$      | $9.5 \times 10^{-1}$ |
| T517G   | $3.3 \times 10^{-1}$      | <b><math>1.0 \times 10^{-3}</math></b> | $4.4 \times 10^5$                               | $4.0 \times 10^{-1}$                    | –                    | –                                      | $8.4 \times 10^{-1}$ | N/A | <b><math>5.3 \times 10^{-3}</math></b> | $9.7 \times 10^1$      | $4.2 \times 10^{-1}$ |
| T517V   | $1.3 \times 10^{-1}$      | <b>0</b>                               | $9.2 \times 10^5$                               | $8.3 \times 10^{-2}$                    | $7.6 \times 10^{-1}$ | $4.5 \times 10^{-1}$                   | $6.1 \times 10^{-1}$ | N/A | <b>0</b>                               | $1.2 \times 10^2$      | $6.0 \times 10^{-1}$ |
| D518G   | $1.9 \times 10^{-1}$      | <b>0</b>                               | $4.2 \times 10^5$                               | $3.8 \times 10^{-1}$                    | 1.6                  | $2.6 \times 10^{-1}$                   | $6.2 \times 10^{-1}$ | N/A | <b>0</b>                               | $1.2 \times 10^2$      | $7.3 \times 10^{-1}$ |
| D518V   | $\leq 1.3 \times 10^{-2}$ | <b>0</b>                               | $\leq 1.3 \times 10^6$                          | <b><math>3.3 \times 10^{-2}</math></b>  | –                    | –                                      | $7.0 \times 10^{-1}$ | N/A | <b><math>6.0 \times 10^{-4}</math></b> | $\geq 8.2 \times 10^1$ | $2.8 \times 10^{-1}$ |
| I519G   | $1.1 \times 10^{-1}$      | <b>0</b>                               | $1.2 \times 10^5$                               | $6.2 \times 10^{-2}$                    | –                    | –                                      | $5.7 \times 10^{-1}$ | N/A | <b><math>7.0 \times 10^{-4}</math></b> | $1.1 \times 10^2$      | $5.4 \times 10^{-1}$ |
| I519V   | $6.4 \times 10^{-1}$      | $6.5 \times 10^{-2}$                   | $5.3 \times 10^5$                               | $7.0 \times 10^{-1}$                    | $9.6 \times 10^{-1}$ | $8.7 \times 10^{-1}$                   | $9.5 \times 10^{-1}$ | N/A | $2.3 \times 10^{-1}$                   | $1.4 \times 10^2$      | $9.5 \times 10^{-1}$ |
| A520G   | 1.3                       | $3.8 \times 10^{-1}$                   | $2.8 \times 10^5$                               | $1.6 \times 10^{-1}$                    | 1.3                  | $3.7 \times 10^{-1}$                   | $7.1 \times 10^{-1}$ | N/A | <b><math>1. \times 10^{-4}</math></b>  | $1.1 \times 10^2$      | $4.9 \times 10^{-1}$ |
| A520V   | $4.8 \times 10^{-1}$      | <b><math>6.0 \times 10^{-3}</math></b> | $7.8 \times 10^5$                               | $4.1 \times 10^{-1}$                    | –                    | –                                      | N/A                  | 1.0 | $5.6 \times 10^{-1}$                   | $1.3 \times 10^2$      | $9.1 \times 10^{-1}$ |
| P521G   | $5.8 \times 10^{-1}$      | $7.7 \times 10^{-2}$                   | $3.4 \times 10^5$                               | $2.3 \times 10^{-1}$                    | 1.9                  | $2.9 \times 10^{-2}$                   | $7.5 \times 10^{-1}$ | N/A | <b><math>7.0 \times 10^{-4}</math></b> | $8.2 \times 10^1$      | $3.3 \times 10^{-1}$ |
| P521V   | 1.5                       | $1.1 \times 10^{-1}$                   | $3.4 \times 10^5$                               | $1.3 \times 10^{-1}$                    | 1.0                  | $9.6 \times 10^{-1}$                   | $9.8 \times 10^{-1}$ | N/A | $7.0 \times 10^{-1}$                   | $1.3 \times 10^2$      | $8.0 \times 10^{-1}$ |
| T522G   | $2.0 \times 10^{-2}$      | <b>0</b>                               | $2.5 \times 10^5$                               | $1.0 \times 10^{-1}$                    | –                    | –                                      | $9.4 \times 10^{-1}$ | N/A | $2.4 \times 10^{-1}$                   | $1.2 \times 10^2$      | $6.3 \times 10^{-1}$ |
| T522V   | $1.6 \times 10^{-1}$      | <b>0</b>                               | $1.7 \times 10^5$                               | $9.8 \times 10^{-2}$                    | 2.6                  | $4.9 \times 10^{-2}$                   | $5.6 \times 10^{-1}$ | N/A | <b><math>1.3 \times 10^{-3}</math></b> | $7.5 \times 10^1$      | $2.7 \times 10^{-1}$ |
| V523A   | $8.0 \times 10^{-1}$      | $3.7 \times 10^{-1}$                   | $1.0 \times 10^5$                               | <b><math>4.5 \times 10^{-2}</math></b>  | 4.0                  | <b><math>5.3 \times 10^{-3}</math></b> | $8.9 \times 10^{-1}$ | N/A | $3.3 \times 10^{-2}$                   | $1.5 \times 10^2$      | $8.2 \times 10^{-1}$ |
| V523G   | $\leq 1.0 \times 10^{-3}$ | <b>0</b>                               | $\leq 1.3 \times 10^6$                          | <b><math>1.6 \times 10^{-2}</math></b>  | –                    | –                                      | –                    | –   | –                                      | –                      | –                    |
| S524G   | 1.0                       | $8.5 \times 10^{-1}$                   | $4.0 \times 10^5$                               | $2.5 \times 10^{-1}$                    | 1.5                  | $2.7 \times 10^{-1}$                   | $8.4 \times 10^{-1}$ | N/A | <b><math>5.5 \times 10^{-3}</math></b> | $8.7 \times 10^1$      | $2.4 \times 10^{-1}$ |
| S524V   | $7.1 \times 10^{-1}$      | $1.3 \times 10^{-1}$                   | $6.4 \times 10^5$                               | $8.4 \times 10^{-1}$                    | 1.1                  | $8.5 \times 10^{-1}$                   | $9.8 \times 10^{-1}$ | N/A | $5.4 \times 10^{-1}$                   | $1.4 \times 10^2$      | $9.6 \times 10^{-1}$ |
| S525G   | $\leq 6.0 \times 10^{-1}$ | $4.0 \times 10^{-2}$                   | $\leq 3.8 \times 10^5$                          | $2.5 \times 10^{-1}$                    | $\leq 2.0$           | $3.0 \times 10^{-2}$                   | $9.4 \times 10^{-1}$ | N/A | $2.7 \times 10^{-1}$                   | $\geq 1.5 \times 10^2$ | $9.0 \times 10^{-1}$ |
| S525V   | $6.7 \times 10^{-1}$      | $1.3 \times 10^{-1}$                   | $9.3 \times 10^5$                               | $1.1 \times 10^{-1}$                    | $5.9 \times 10^{-1}$ | $1.4 \times 10^{-1}$                   | N/A                  | 1.0 | $5.0 \times 10^{-1}$                   | $1.6 \times 10^2$      | $7.1 \times 10^{-1}$ |
| L526G   | $1.6 \times 10^{-1}$      | <b>0</b>                               | $3.4 \times 10^5$                               | $1.4 \times 10^{-1}$                    | 1.5                  | $1.9 \times 10^{-1}$                   | $8.4 \times 10^{-1}$ | N/A | <b><math>5.0 \times 10^{-4}</math></b> | $8.4 \times 10^1$      | $2.2 \times 10^{-1}$ |
| L526V   | 1.1                       | $6.2 \times 10^{-1}$                   | $6.2 \times 10^5$                               | $9.8 \times 10^{-1}$                    | $8.4 \times 10^{-1}$ | $4.8 \times 10^{-1}$                   | N/A                  | 1.0 | $7.8 \times 10^{-1}$                   | $1.8 \times 10^2$      | $4.9 \times 10^{-1}$ |
| L527G   | $1.0 \times 10^{-1}$      | <b>0</b>                               | $1.2 \times 10^5$                               | <b><math>2.8 \times 10^{-2}</math></b>  | –                    | –                                      | $8.5 \times 10^{-1}$ | N/A | <b><math>3.6 \times 10^{-3}</math></b> | $9.9 \times 10^1$      | $3.9 \times 10^{-1}$ |
| L527V   | 1.1                       | $6.6 \times 10^{-1}$                   | $2.8 \times 10^5$                               | <b><math>4.4 \times 10^{-2}</math></b>  | $9.3 \times 10^{-1}$ | $8.3 \times 10^{-1}$                   | $9.7 \times 10^{-1}$ | N/A | $4.8 \times 10^{-1}$                   | $1.2 \times 10^2$      | $5.7 \times 10^{-1}$ |
| K528G   | $1.1 \times 10^{-1}$      | <b>0</b>                               | $1.8 \times 10^5$                               | <b><math>4.0 \times 10^{-2}</math></b>  | 3.1                  | <b><math>4.2 \times 10^{-3}</math></b> | $7.0 \times 10^{-1}$ | N/A | <b>0</b>                               | $7.6 \times 10^1$      | $1.3 \times 10^{-1}$ |
| K528V   | $1.8 \times 10^{-1}$      | <b>0</b>                               | $9.1 \times 10^5$                               | $1.5 \times 10^{-1}$                    | –                    | –                                      | $6.8 \times 10^{-1}$ | N/A | <b><math>6.0 \times 10^{-4}</math></b> | $1.2 \times 10^2$      | $7.3 \times 10^{-1}$ |
| I529G   | $1.5 \times 10^{-1}$      | <b>0</b>                               | $4.1 \times 10^5$                               | $2.6 \times 10^{-1}$                    | $9.1 \times 10^{-1}$ | $8.2 \times 10^{-1}$                   | $6.2 \times 10^{-1}$ | N/A | <b>0</b>                               | $8.1 \times 10^1$      | $2.0 \times 10^{-1}$ |
| I529V   | $9.4 \times 10^{-1}$      | $8.4 \times 10^{-1}$                   | $6.1 \times 10^5$                               | $9.9 \times 10^{-1}$                    | $8.1 \times 10^{-1}$ | $5.6 \times 10^{-1}$                   | $9.9 \times 10^{-1}$ | N/A | $6.9 \times 10^{-1}$                   | $9.7 \times 10^1$      | $3.8 \times 10^{-1}$ |
| Q530G   | 1.2                       | $3.3 \times 10^{-1}$                   | $5.0 \times 10^4$                               | $5.6 \times 10^{-2}$                    | 6.0                  | $1.2 \times 10^{-2}$                   | $7.6 \times 10^{-1}$ | N/A | <b><math>1. \times 10^{-4}</math></b>  | $8.8 \times 10^1$      | $2.6 \times 10^{-1}$ |
| Q530V   | $5.6 \times 10^{-1}$      | $1.1 \times 10^{-2}$                   | $6.8 \times 10^5$                               | $6.5 \times 10^{-1}$                    | $3.9 \times 10^{-1}$ | <b><math>3.4 \times 10^{-3}</math></b> | $7.0 \times 10^{-1}$ | N/A | <b>0</b>                               | $1.1 \times 10^2$      | $4.6 \times 10^{-1}$ |
| F531G   | 1.5                       | $1.3 \times 10^{-1}$                   | $2.6 \times 10^5$                               | $1.5 \times 10^{-1}$                    | 1.4                  | $2.2 \times 10^{-1}$                   | $8.2 \times 10^{-1}$ | N/A | <b><math>2.0 \times 10^{-3}</math></b> | $8.9 \times 10^1$      | $2.9 \times 10^{-1}$ |
| F531V   | $6.8 \times 10^{-1}$      | $1.2 \times 10^{-1}$                   | $5.2 \times 10^5$                               | $7.0 \times 10^{-1}$                    | $7.8 \times 10^{-1}$ | $4.7 \times 10^{-1}$                   | $9.4 \times 10^{-1}$ | N/A | $2.3 \times 10^{-1}$                   | $1.3 \times 10^2$      | $8.2 \times 10^{-1}$ |
| P532G   | 1.3                       | $4.2 \times 10^{-1}$                   | $1.6 \times 10^5$                               | $6.3 \times 10^{-2}$                    | 3.0                  | <b><math>1.2 \times 10^{-3}</math></b> | $6.6 \times 10^{-1}$ | N/A | <b><math>1. \times 10^{-4}</math></b>  | $7.9 \times 10^1$      | $2.1 \times 10^{-1}$ |
| P532V   | $2.6 \times 10^{-1}$      | <b>0</b>                               | $3.4 \times 10^5$                               | $2.4 \times 10^{-1}$                    | –                    | –                                      | $5.7 \times 10^{-1}$ | N/A | <b>0</b>                               | $1.3 \times 10^2$      | $7.7 \times 10^{-1}$ |
| S533G   | 1.1                       | $8.1 \times 10^{-1}$                   | $2.4 \times 10^5$                               | $9.1 \times 10^{-2}$                    | 2.3                  | <b><math>6.6 \times 10^{-3}</math></b> | $5.9 \times 10^{-1}$ | N/A | <b><math>3.0 \times 10^{-4}</math></b> | $9.3 \times 10^1$      | $3.5 \times 10^{-1}$ |
| S533V   | $\leq 4.2 \times 10^{-2}$ | <b>0</b>                               | $\leq 8.0 \times 10^4$                          | <b><math>1.7 \times 10^{-2}</math></b>  | –                    | –                                      | –                    | –   | –                                      | –                      | –                    |
| G534A   | 1.5                       | $6.1 \times 10^{-2}$                   | $2.5 \times 10^5$                               | $7.9 \times 10^{-2}$                    | 2.9                  | <b><math>4.6 \times 10^{-3}</math></b> | $7.3 \times 10^{-1}$ | N/A | <b>0</b>                               | $9.8 \times 10^1$      | $3.4 \times 10^{-1}$ |
| G534V   | $3.3 \times 10^{-1}$      | <b>0</b>                               | $6.1 \times 10^5$                               | $9.9 \times 10^{-1}$                    | 1.4                  | $3.0 \times 10^{-1}$                   | $3.9 \times 10^{-1}$ | N/A | <b><math>1. \times 10^{-4}</math></b>  | $9.7 \times 10^1$      | $3.9 \times 10^{-1}$ |
| A535G   | 1.5                       | $1.5 \times 10^{-1}$                   | $2.7 \times 10^5$                               | $1.3 \times 10^{-1}$                    | 2.4                  | <b><math>3.0 \times 10^{-3}</math></b> | $9.7 \times 10^{-1}$ | N/A | $6.6 \times 10^{-1}$                   | $8.5 \times 10^1$      | $2.6 \times 10^{-1}$ |
| A535V   | $7.9 \times 10^{-1}$      | $4.0 \times 10^{-1}$                   | $8.6 \times 10^5$                               | $2.2 \times 10^{-1}$                    | $7.2 \times 10^{-1}$ | $2.2 \times 10^{-1}$                   | N/A                  | 1.0 | $3.6 \times 10^{-1}$                   | $2.1 \times 10^2$      | $1.7 \times 10^{-1}$ |
| V536A   | $8.9 \times 10^{-1}$      | $6.5 \times 10^{-1}$                   | $1.2 \times 10^5$                               | $5.3 \times 10^{-2}$                    | 2.6                  | $2.4 \times 10^{-2}$                   | $8.6 \times 10^{-1}$ | N/A | $3.5 \times 10^{-2}$                   | $1.4 \times 10^2$      | $9.2 \times 10^{-1}$ |
| V536G   | $\leq 2.2 \times 10^{-1}$ | <b>0</b>                               | $\leq 2.8 \times 10^5$                          | $1.6 \times 10^{-1}$                    | $\leq 1.3$           | $4.6 \times 10^{-1}$                   | $6.5 \times 10^{-1}$ | N/A | <b><math>1. \times 10^{-4}</math></b>  | $\geq 7.9 \times 10^1$ | $2.5 \times 10^{-1}$ |
| G537A   | $8.1 \times 10^{-2}$      | <b>0</b>                               | $6.4 \times 10^5$                               | $8.5 \times 10^{-1}$                    | –                    | –                                      | $6.7 \times 10^{-1}$ | N/A | <b>0</b>                               | $1.4 \times 10^2$      | $9.4 \times 10^{-1}$ |
| G537V   | $\leq 6.2 \times 10^{-2}$ | <b>0</b>                               | $\leq 1.2 \times 10^5$                          | <b><math>2.7 \times 10^{-2}</math></b>  | –                    | –                                      | $4.3 \times 10^{-1}$ | N/A | <b>0</b>                               | $\geq 5.7 \times 10^1$ | $1.1 \times 10^{-1}$ |
| K538G   | 1.6                       | $1.0 \times 10^{-1}$                   | $1.5 \times 10^5$                               | $5.7 \times 10^{-2}$                    | 3.5                  | <b><math>4.8 \times 10^{-4}</math></b> | $7.7 \times 10^{-1}$ | N/A | <b><math>5.4 \times 10^{-3}</math></b> | $8.0 \times 10^1$      | $3.1 \times 10^{-1}$ |
| K538V   | 1.3                       | $3.7 \times 10^{-1}$                   | $3.3 \times 10^5$                               | $1.2 \times 10^{-1}$                    | $9.4 \times 10^{-1}$ | $8.3 \times 10^{-1}$                   | $9.6 \times 10^{-1}$ | N/A | $3.4 \times 10^{-1}$                   | $1.2 \times 10^2$      | $6.9 \times 10^{-1}$ |
| P539G   | 1.1                       | $6.4 \times 10^{-1}$                   | $4.9 \times 10^5$                               | $5.4 \times 10^{-1}$                    | $8.0 \times 10^{-1}$ | $4.1 \times 10^{-1}$                   | N/A                  | 1.0 | $4.3 \times 10^{-1}$                   | $1.4 \times 10^2$      | $9.8 \times 10^{-1}$ |
| P539V   | 1.3                       | $2.5 \times 10^{-1}$                   | $7.1 \times 10^5$                               | $6.0 \times 10^{-1}$                    | $5.6 \times 10^{-1}$ | $3.4 \times 10^{-2}$                   | N/A                  | 1.1 | $2.7 \times 10^{-1}$                   | $1.4 \times 10^2$      | $9.4 \times 10^{-1}$ |
| I540G   | $4.3 \times 10^{-2}$      | <b>0</b>                               | $1.6 \times 10^5$                               | $9.6 \times 10^{-2}$                    | –                    | –                                      | $5.8 \times 10^{-1}$ | N/A | <b><math>1.0 \times 10^{-3}</math></b> | $1.0 \times 10^2$      | $4.6 \times 10^{-1}$ |
| I540V   | $5.6 \times 10^{-1}$      | $2.2 \times 10^{-2}$                   | $7.2 \times 10^5$                               | $5.5 \times 10^{-1}$                    | $6.4 \times 10^{-1}$ | $1.6 \times 10^{-1}$                   | $9.7 \times 10^{-1}$ | N/A | $5.2 \times 10^{-1}$                   | $1.6 \times 10^2$      | $7.5 \times 10^{-1}$ |
| T541G   | $4.6 \times 10^{-1}$      | <b><math>2.0 \times 10^{-3}</math></b> | $5.1 \times 10^5$                               | $6.5 \times 10^{-1}$                    | 1.4                  | $4.2 \times 10^{-1}$                   | $8.4 \times 10^{-1}$ | N/A | <b><math>1.9 \times 10^{-3}</math></b> | $9.4 \times 10^1$      | $3.6 \times 10^{-1}$ |
| T541V   | $9.6 \times 10^{-1}$      | $7.5 \times 10^{-1}$                   | $5.7 \times 10^5$                               | $7.9 \times 10^{-1}$                    | $7.8 \times 10^{-1}$ | $4.8 \times 10^{-1}$                   | N/A                  | 1.1 | $1.2 \times 10^{-1}$                   | $1.5 \times 10^2$      | $9.1 \times 10^{-1}$ |
| E542G   | $3.6 \times 10^{-1}$      | <b>0</b>                               | $5.9 \times 10^5$                               | $9.5 \times 10^{-1}$                    | 1.4                  | $2.9 \times 10^{-1}$                   | N/A                  | 1.1 | $1.4 \times 10^{-1}$                   | $1.0 \times 10^2$      | $4.5 \times 10^{-1}$ |
| E542V   | $5.7 \times 10^{-1}$      | $4.3 \times 10^{-2}$                   | $4.4 \times 10^5$                               | $4.0 \times 10^{-1}$                    | 1.4                  | $4.0 \times 10^{-1}$                   | $8.6 \times 10^{-1}$ | N/A | $2.5 \times 10^{-2}$                   | $1.3 \times 10^2$      | $7.8 \times 10^{-1}$ |
| V543A   | 1.6                       | $4.8 \times 10^{-2}$                   | $3.6 \times 10^5$                               | $1.7 \times 10^{-1}$                    | 1.1                  | $6.5 \times 10^{-1}$                   | N/A                  | 1.1 | $1.6 \times 10^{-1}$                   | $1.9 \times 10^2$      | $3.1 \times 10^{-1}$ |
| V543G   | $6.2 \times 10^{-1}$      | $4.1 \times 10^{-2}$                   | $2.1 \times 10^5$                               | $5.9 \times 10^{-2}$                    | 2.1                  | $1.9 \times 10^{-2}$                   | $9.5 \times 10^{-1}$ | N/A | $2.7 \times 10^{-1}$                   | $1.2 \times 10^2$      | $5.9 \times 10^{-1}$ |
| I544G   | $6.0 \times 10^{-1}$      | $8.6 \times 10^{-2}$                   | $5.0 \times 10^5$                               | $6.4 \times 10^{-1}$                    | 1.0                  | $9.8 \times 10^{-1}$                   | $6.9 \times 10^{-1}$ | N/A | <b><math>8.0 \times 10^{-4}</math></b> | $7.7 \times 10^1$      | $2.9 \times 10^{-1}$ |
| I544V   | $4.4 \times 10^{-1}$      | <b><math>1.0 \times 10^{-3}</math></b> | $8.4 \times 10^5$                               | $2.4 \times 10^{-1}$                    | $7.6 \times 10^{-1}$ | $3.1 \times 10^{-1}$                   | $9.7 \times 10^{-1}$ | N/A | $5.8 \times 10^{-1}$                   | $1.4 \times 10^2$      | 1.0                  |
| G545A   | 1.6                       | $1.1 \times 10^{-1}$                   | $3.3 \times 10^5$                               | $1.4 \times 10^{-1}$                    | 1.5                  | $1.2 \times 10^{-1}$                   | $9.2 \times 10^{-1}$ | N/A | $2.0 \times 10^{-1}$                   | $8.7 \times 10^1$      | $2.9 \times 10^{-1}$ |
| G545V   | 1.4                       | $6.5 \times 10^{-2}$                   | $4.3 \times 10^5$                               | $2.4 \times 10^{-1}$                    | $8.6 \times 10^{-1}$ | $7.2 \times 10^{-1}$                   | N/A                  | 1.1 | $2.5 \times 10^{-1}$                   | $1.6 \times 10^2$      | $5.6 \times 10^{-1}$ |
| R546G   | 1.4                       | $2.3 \times 10^{-1}$                   | $3.1 \times 10^5$                               | $1.4 \times 10^{-1}$                    | 1.2                  | $6.4 \times 10^{-1}$                   | $9.7 \times 10^{-1}$ | N/A | $3.5 \times 10^{-1}$                   | $1.5 \times 10^2$      | $8.9 \times 10^{-1}$ |
| R546V   | $9.3 \times 10^{-1}$      | $6.9 \times 10^{-1}$                   | $5.7 \times 10^5$                               | $7.0 \times 10^{-1}$                    | $8.6 \times 10^{-1}$ | $6.7 \times 10^{-1}$                   | N/A                  | 1.0 | $4.3 \times 10^{-1}$                   | $1.5 \times 10^2$      | $8.4 \times 10^{-1}$ |
